# Supplementary material for: A comparative transcriptomic analysis of replicating and dormant liver stages of the relapsing malaria parasite Plasmodium cynomolgi
Source: eLife. 2017 Dec 7;6:e29605. doi: 10.7554/eLife.29605 (PMC5758109; doi:10.7554/eLife.29605)
Supplement: Figure 1—figure supplement 3—source data 1. [file elife-29605-fig1-figsupp3-data1.xlsx]

## Sheet: Plasmodium-selected-genes
Gene Name	Gene Id	Count type	GFPhigh_PAC22_F2_ampl	GFPhigh_PAC20_F1_ampl	GFPhigh_PAC20_F2_ampl	GFPlow_PAC22_F1_ampl	GFPlow_PAC22_F2_ampl	GFPlow_PAC20_F1_ampl	GFPlow_PAC20_F2_ampl	Mean Schizonts	Mean Hypnozoites
Ferrodoxin	PcyM_1419800	raw	450.553	229.448	153.233	0.446751	0.530938	0.619671	1.06722	277.745	0.666146
Ferrodoxin	PcyM_1419800	CPM	19.1153	4.89491	4.79703	0.00648284	0.0133476	0.0167138	0.0211451	9.60241	0.0144223
Ferrodoxin	PcyM_1419800	Group normalized	17.3727	6.05347	4.3219	0.0133649	0.0194141	0.00643245	0.0191854	9.24937	0.0145992
Ferrodoxin	PcyM_1419800	Host normalized	19.8805	6.92729	4.94577	0.0129287	0.0187804	0.00622249	0.0185592	10.5845	0.0141227
Ferrodoxin	PcyM_1419800	FPKM	111.623	38.8947	27.7691	0.0725907	0.105446	0.0349374	0.104204	59.429	0.0792947
HSP70	PcyM_0515400	raw	31227	51558	47080.1	2476.2	1219.28	6528	3276.03	43288.4	3374.88
HSP70	PcyM_0515400	CPM	1324.85	1099.91	1473.86	35.9323	30.6523	176.073	64.9086	1299.54	76.8916
HSP70	PcyM_0515400	Group normalized	1204.07	1360.24	1327.89	74.0775	44.5836	67.7634	58.893	1297.4	61.3294
HSP70	PcyM_0515400	Host normalized	1377.88	1556.59	1519.57	71.6595	43.1283	65.5515	56.9707	1484.68	59.3275
HSP70	PcyM_0515400	FPKM	852.619	963.201	940.291	44.3422	26.6873	40.5626	35.2529	918.704	36.7112
GAPDH	PcyM_1250000	raw	90112.1	74556.8	55682.6	3889.78	5755.85	13598.5	3808.61	73450.5	6763.18
GAPDH	PcyM_1250000	CPM	3823.13	1590.55	1743.17	56.4449	144.701	366.778	75.4608	2385.61	160.846
GAPDH	PcyM_1250000	Group normalized	3474.61	1967.01	1570.52	116.366	210.466	141.158	68.4673	2337.38	134.114
GAPDH	PcyM_1250000	Host normalized	3976.17	2250.95	1797.22	112.568	203.596	136.55	66.2324	2674.78	129.737
GAPDH	PcyM_1250000	FPKM	4666.5	2641.75	2109.25	132.111	238.944	160.258	77.7315	3139.16	152.261
GAP45	PcyM_1442700	raw	0.618695	5.56178	3.03277	3.83803	5.42557	10.3834	14.1215	3.07108	8.44211
GAP45	PcyM_1442700	CPM	0.026249	0.118652	0.0949421	0.055694	0.136397	0.28006	0.279792	0.0799476	0.187986
GAP45	PcyM_1442700	Group normalized	0.0238561	0.146735	0.0855386	0.114818	0.198389	0.107784	0.253861	0.0853765	0.168713
GAP45	PcyM_1442700	Host normalized	0.0272997	0.167916	0.0978861	0.11107	0.191914	0.104266	0.245575	0.0977006	0.163206
GAP45	PcyM_1442700	FPKM	0.0584616	0.359587	0.20962	0.237853	0.410978	0.223282	0.525892	0.209223	0.349501
ETRAMP	PcyM_0533600	raw	0.474136	7.72258	4.82515	108.184	50.5891	55.6794	86.1342	4.34062	75.1468
ETRAMP	PcyM_0533600	CPM	0.0201158	0.164749	0.151054	1.56987	1.2718	1.50178	1.70659	0.111973	1.51251
ETRAMP	PcyM_0533600	Group normalized	0.0182821	0.203743	0.136093	3.23643	1.84982	0.577976	1.54843	0.119372	1.80316
ETRAMP	PcyM_0533600	Host normalized	0.0209211	0.233153	0.155737	3.13078	1.78944	0.55911	1.49789	0.136604	1.74431
ETRAMP	PcyM_0533600	FPKM	0.0560493	0.624636	0.417234	8.38764	4.79406	1.4979	4.01297	0.365973	4.67314
