# Supplementary material for: A comparative transcriptomic analysis of replicating and dormant liver stages of the relapsing malaria parasite Plasmodium cynomolgi
Source: eLife. 2017 Dec 7;6:e29605. doi: 10.7554/eLife.29605 (PMC5758109; doi:10.7554/eLife.29605)
Supplement: Figure 4—source data 1. — Results of the three assays presented in Figure 4C. [file elife-29605-fig4-data1.xlsx]

## Sheet: Blad1
Test 1	WellName	Hepatocyte nuclei	# Small parasites (Hz)	# Large parasites (Sz)	# Total parasites	Neocuproine concentration (μM)	% Hep nuclei vs ctrl	% Small vs ctrl	% Large vs ctrl
	B2	32508	1	2	3	10	88.73	2	4
	B3	27968	5	4	9	10	76.3381	8	8
	C2	34821	17	6	23	1	95.0433	28	12
	C3	34978	33	31	64	1	95.4718	54	62
	D2	36813	58	36	94	0.1	100.48	94	72
	D3	34227	32	35	67	0.1	93.422	52	70
	E2	37588	62	34	96	DMSO control	102.596
	F2	37266	75	73	148	DMSO control	101.717
	G2	35056	48	43	91	DMSO control	95.6847
Test 2	WellName	Hepatocyte nuclei	# Small parasites (Hz)	# Large parasites (Sz)	# Total parasites	Neocuproine concentration (μM)	% Hep nuclei vs ctrl	% Small vs ctrl	% Large vs ctrl
	B4	41795	28	39	67	10	104	44	46
	C4	40233	25	23	48	10	100	40	27
	B3	40578	91	119	210	1	101	144	141
	C3	39785	75	103	178	1	99	119	122
	B2	42168	107	167	274	0.1	105	169	197
	C2	40564	86	122	208	0.1	101	136	144
	D2	41461	66	68	134	DMSO control	103.227
	D3	39958	72	114	186	DMSO control	99.4846
	D4	39777	69	104	173	DMSO control	99.034
	E2	40701	33	27	60	DMSO control	101.334
	E3	39397	60	111	171	DMSO control	98.0879
	E4	39694	79	84	163	DMSO control	98.8273
Test 3	WellName	Hepatocyte nuclei	# Small parasites (Hz)	# Large parasites (Sz)	# Total parasites	Neocuproine concentration (uM)	% Hep nuclei vs ctrl	% Small vs ctrl	% Large vs ctrl
	B3	67099	5	5	10	10	98.465	23	13
	C3	67611	5	11	16	10	99.2164	23	29
	D3	67310	5	13	18	10	98.7747	23	34
	B2	66791	24	54	78	1	98.0131	109	142
	C2	68372	31	61	92	1	100.333	141	161
	D2	67255	14	41	55	1	98.694	64	108
	E2	66777	24	58	82	0.1	97.9925	109	153
	F2	66656	21	48	69	0.1	97.815	95	126
	G2	67887	20	40	60	0.1	99.6214	91	105
	E3	69504	22	35	57	DMSO control	101.994
	F3	67186	21	43	64	DMSO control	98.5927
	G3	67744	23	36	59	DMSO control	99.4115
