# Supplementary material for: A comparative transcriptomic analysis of replicating and dormant liver stages of the relapsing malaria parasite Plasmodium cynomolgi
Source: eLife journal article supplement (doi:10.7554/elife.29605), 2017-12-07

Figure 3 - figure supplement 1

A

Mitochondrial electron flow

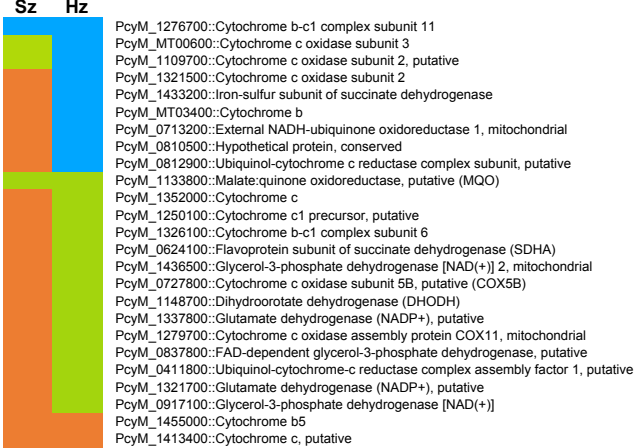

ATP synthase complex

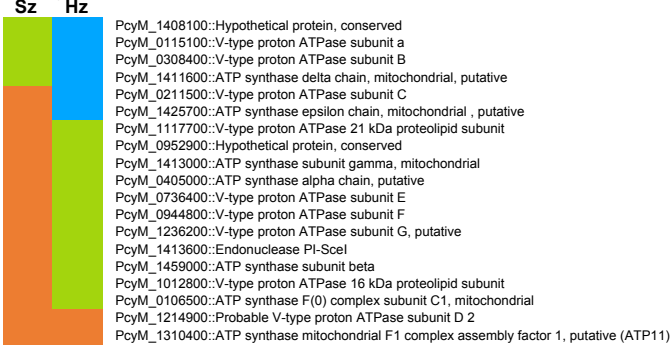

Transporters of the mitochondrial and apicoplast membranes

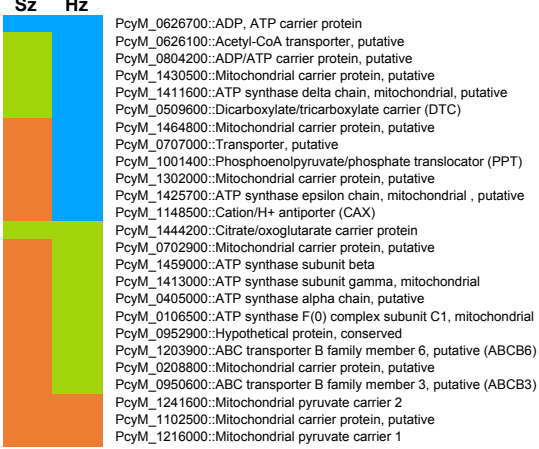

Mitochondrial antioxidant system

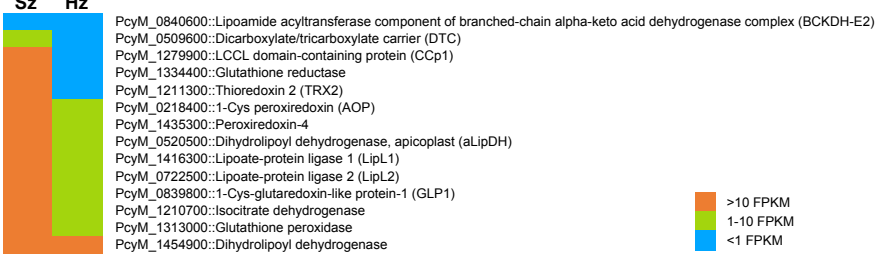

B

Histone acetylation

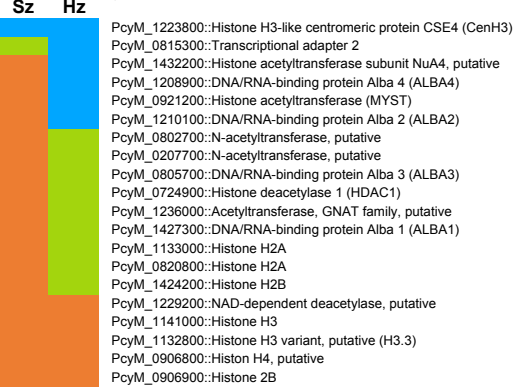

Nucleotide excision repair

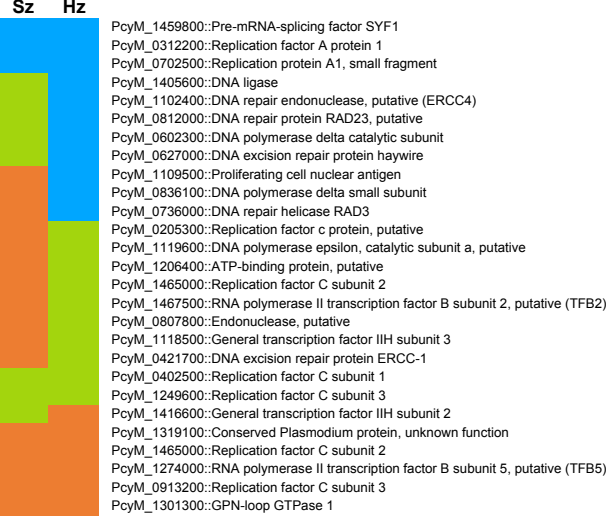

Chromatin landscape

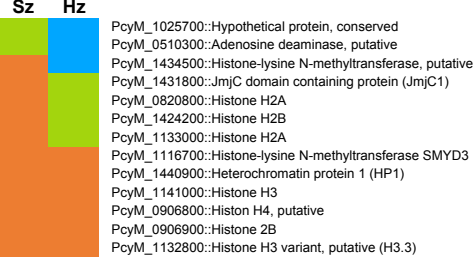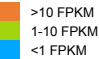

Supplement: supp [file elife-29605-supp-v1.zip]
