# Supplementary material for: A comparative transcriptomic analysis of replicating and dormant liver stages of the relapsing malaria parasite Plasmodium cynomolgi
Source: eLife journal article supplement (doi:10.7554/elife.29605), 2017-12-07

Figure 3 - figure supplement 2

A

ZnF's transcription factors (putative)

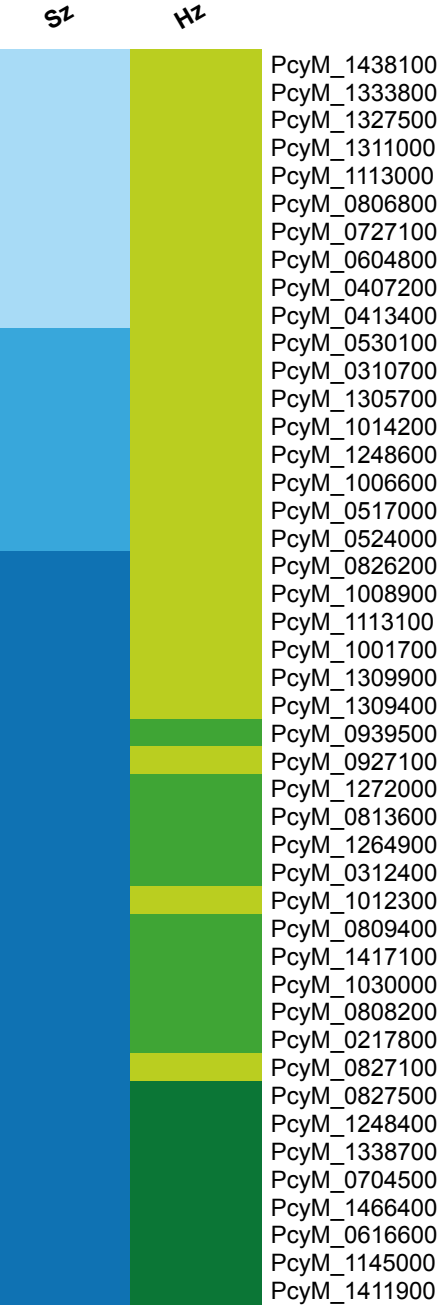

AP2-transcription factors (putative)

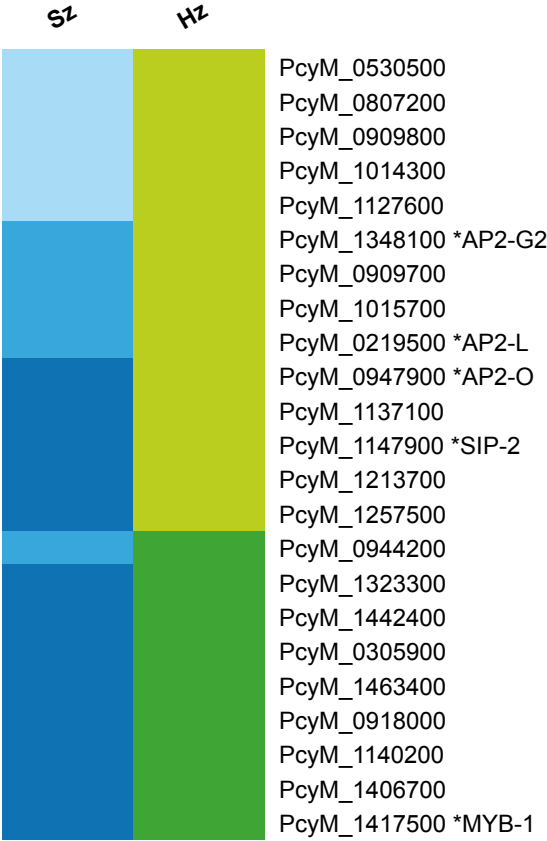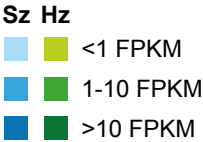

B

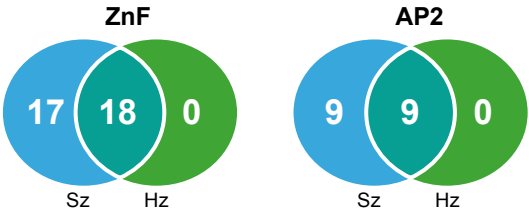

Supplement: supp [file elife-29605-supp-v1.zip]
