# Supplementary material for: A comparative transcriptomic analysis of replicating and dormant liver stages of the relapsing malaria parasite Plasmodium cynomolgi
Source: eLife. 2017 Dec 7;6:e29605. doi: 10.7554/eLife.29605 (PMC5758109; doi:10.7554/eLife.29605)
Supplement: Supplementary file 1. [file elife-29605-supp1.xlsx]

## Sheet: Supplementary_Table_1
Supplementary File 1: P. cynomolgi samples used for RNAseq, related to Figure 1
Sample	Sample ID	Infection	Fresh/frozen hepatocytes	# Sorted events	Hepatocyte origin	EEF harvested at
GFPhigh	Sz-1	PAC20 - Feed 1	Frozen	1245	M. mulatta	Day 6
	Sz-2	PAC20 - Feed 2	Frozen	921	M. mulatta	Day 6
		PAC21*	Fresh	337	M. mulatta	Day 6
		PAC22 - Feed 1*	Fresh	595	M. fascicularis	Day 7
	Sz-3	PAC22 - Feed 2	Fresh	1002	M. fascicularis	Day 7
GFPlow	Hz-1	PAC20 - Feed 1	Frozen	2713	M. mulatta	Day 6
	Hz-2	PAC20 - Feed 2	Frozen	1947	M. mulatta	Day 6
		PAC21*	Fresh	993	M. mulatta	Day 6
	Hz-3	PAC22 - Feed 1	Fresh	1193	M. fascicularis	Day 7
	Hz-4	PAC22 - Feed 2	Fresh	1453	M. fascicularis	Day 7
*Did not pass quality tests
