# Supplementary material for: A comparative transcriptomic analysis of replicating and dormant liver stages of the relapsing malaria parasite Plasmodium cynomolgi
Source: eLife. 2017 Dec 7;6:e29605. doi: 10.7554/eLife.29605 (PMC5758109; doi:10.7554/eLife.29605)
Supplement: Supplementary file 2. [file elife-29605-supp2.xlsx]

## Sheet: Supplementary_Table_2
Supplementary File 2: Reference genomes used in the analysis, related to Figure 1
Species	Plasmodium cynomolgi	Macaca mulatta	Macaca fascicularis
Genome version	Pcynom M_v2	rheMac7	fasMac5
Genome length	30.7M	2.81G	2.95G
Number of scaffolds	17	21	7601
Number of genes	7178	16.0K	36.2K
Number of transcripts	7178	18.8K	77.9K
