# Supplementary material for: A comparative transcriptomic analysis of replicating and dormant liver stages of the relapsing malaria parasite Plasmodium cynomolgi
Source: eLife. 2017 Dec 7;6:e29605. doi: 10.7554/eLife.29605 (PMC5758109; doi:10.7554/eLife.29605)
Supplement: Supplementary file 3. [file elife-29605-supp3.xlsx]

## Sheet: Supplementary_Table_3
Supplementary File 3: Alignment statistics per sample, related to Figure 1
Sample name	Sample ID	Infection	Liver stage	Host	Total reads	% reads aligned to parasite and host genome	% reads aligned to parasite and host exons	% reads aligned to parasite exons only	Sample status
GFPhigh	Sz-1	PAC20 - Feed 1	Schizont	M. mulatta	115767036	81.24	41.72	6.26	Incl.
	Sz-2	PAC20 - Feed 2	Schizont	M. mulatta	88480192	78.67	37.42	7.39	Incl.
		PAC21*	Schizont	M. mulatta	37645277	37.54	17.33	2.88	Excl.
		PAC22 - Feed 1*	Schizont	M. fascicularis	39984615	44.19	17.25	3.57	Excl.
	Sz-3	PAC22 - Feed 2	Schizont	M. fascicularis	83703559	75.5	28.56	8.18	Incl.
GFPlow	Hz-1	PAC20 - Feed 1	Hypnozoite	M. mulatta	79362572	73	47.69	1.95	Incl.
	Hz-2	PAC20 - Feed 2	Hypnozoite	M. mulatta	96266821	72.9	54.2	0.57	Incl.
		PAC21*	Hypnozoite	M. mulatta	136939535	82.25	65.18	0.06	Excl.
	Hz-3	PAC22 - Feed 1	Hypnozoite	M. fascicularis	113158463	84.48	61.63	0.42	Incl.
	Hz-4	PAC22 - Feed 2	Hypnozoite	M. fascicularis	66142826	77.33	60.79	0.72	Incl.
*Did not pass quality tests
