# Supplementary material for: A comparative transcriptomic analysis of replicating and dormant liver stages of the relapsing malaria parasite Plasmodium cynomolgi
Source: eLife. 2017 Dec 7;6:e29605. doi: 10.7554/eLife.29605 (PMC5758109; doi:10.7554/eLife.29605)
Supplement: Supplementary file 4. [file elife-29605-supp4.xlsx]

## Sheet: Supplementary_Table_4
Supplementary File 4: Gene expression values (FPKM after host normalization) generated by RNA-seq of hypnozoite (Hz) and liver schizont (Sz) samples, related to Figure 1
Gene Id	Sz-1	Sz-2	Sz-3	Hz-1	Hz-2	Hz-3	Hz-4	Average FPKM Sz	Average FPKM Hz	P. vivax Gene ID, Description
PcyM_0000100	1.7075	10.0258	6.11864	1.72952	2.62779	0.280047	0.660557	5.95066	1.32448
PcyM_0000200	0.503898	0.720539	0.0654957	0.159931	0.395271	0.0973132	0.0222979	0.429978	0.168703
PcyM_0000300	0.0720914	0.293489	0.0826	0.0287389	0.0348872	0.0123492	0.0487861	0.149394	0.0311904
PcyM_0000400	0.0514892	0.217267	0.195843	0.0413011	0.0421644	0	0.0457663	0.154866	0.032308
PcyM_0000500	1.23881	1.0101	0.170403	0.149491	0.242487	0.0834472	0.0962544	0.806439	0.14292
PcyM_0000600	0.589356	1.46566	0.831187	0.165492	0.406947	0.0639452	0.554046	0.962069	0.297608
PcyM_0000700	0.219629	0.535815	0.125182	0.0764237	0.175069	0.117943	0.239611	0.293542	0.152262
PcyM_0000800	4.9815	2.49397	1.99791	0.987564	2.17626	1.14955	1.23637	3.15779	1.38744
PcyM_0000900	2.70662	4.70273	1.33635	1.31037	1.87423	0.803604	0.796584	2.91523	1.1962
PcyM_0001000	6.25596	5.22336	0.598837	0.932184	1.66779	0.715607	0.698381	4.02605	1.00349
PcyM_0001100	20.6136	12.243	17.3302	0.0887333	0.220741	0.115389	0.0608012	16.729	0.121416	PVX_241290, unspecified product
PcyM_0001200	0.117591	0.354267	0.348698	0.215589	0.178227	0.0730433	0.351613	0.273519	0.204618	PVX_078695, unspecified product
PcyM_0001300	0.11773	0.253097	0.122994	0.0283558	0.0941303	0.00694755	0.0516485	0.164607	0.0452705
PcyM_0001400	0.0716452	0.127595	0.0677252	0.0477496	0.116619	0.00980691	0.483396	0.0889883	0.164393
PcyM_0001500	0.732091	0.743891	0.69176	0.134571	0.331558	0.101973	0.142257	0.722581	0.17759
PcyM_0001600	0.711848	1.19877	0.0876728	0.32539	0.206302	0.176221	0.0865285	0.666097	0.19861
PcyM_0001700	2.38182	3.6494	1.62842	0.361306	1.70736	1.36133	1.24211	2.55321	1.16803
PcyM_0001800	1.51392	2.03637	45.2298	0.111663	0.646093	0.251378	0.221402	16.26	0.307634
PcyM_0001900	1.32218	1.11872	0.217857	0.387465	0.586147	0.295802	0.527095	0.886252	0.449127
PcyM_0002000	0.569529	1.47655	0.591105	0.23085	0.501471	0.184501	0.429023	0.879061	0.336461
PcyM_0002100	0.25363	2.11635	0.203923	0.180536	0.587326	0.269176	0.491272	0.857967	0.382077
PcyM_0002200	1.05129	3.12907	0.355956	0.556555	2.33793	0.517097	0.1687	1.5121	0.895071
PcyM_0002300	0.732396	0.898971	0.214025	0.199218	0.362053	0.404994	0.123631	0.615131	0.272474
PcyM_0002400	0.212478	0.358884	0.0207567	0.0472505	0.0212365	0.0165841	0.0324244	0.197373	0.0293739
PcyM_0002500	0.795838	0.395311	0.0617231	0.0864173	0.293187	0.0442162	0.0640469	0.417624	0.121967
PcyM_0002600	4.44214	5.47315	1.92216	1.06143	0.512713	1.48637	3.25861	3.94581	1.57978
PcyM_0002700	0.495449	0.705384	0.127963	0.246137	0.134595	0.0578879	0.263612	0.442932	0.175558
PcyM_0002800	1.9783	16.263	0.135681	0.240477	0.264763	0.752112	0.229324	6.12567	0.371669
PcyM_0002900	0.450341	1.37812	0.181739	0.234339	0.587472	0.699075	1.65522	0.670068	0.794026	PVX_102640, unspecified product
PcyM_0003000	0.664351	2.11028	0.12214	0.150438	0.672342	1.11991	0.102822	0.965591	0.511379
PcyM_0003100	0.151529	0.453027	0.500143	0.362083	0.273866	0.112455	0.499308	0.368233	0.311928
PcyM_0003200	5.76701	7.8297	2.0795	2.16838	2.81998	2.37778	1.83941	5.2254	2.30139
PcyM_0003300	1.16061	1.56461	0.734673	1.86866	0.385013	0.218994	0.580658	1.1533	0.763332
PcyM_0003400	0.383669	2.51688	0.459346	0.155523	0.753264	0.173773	0.256141	1.11996	0.334675
PcyM_0003500	0.274859	0.163918	0.0559115	0.0189331	0.0919575	0.0550499	0.0380304	0.164896	0.0509927
PcyM_0003600	0.885896	1.38257	1.1969	0.354965	0.252798	0.133769	0.359688	1.15512	0.275305
PcyM_0003700	0.0209942	0.0779093	0.035708	0.0137697	0.0235339	0.0403927	0.0499285	0.0448705	0.0319062
PcyM_0003800	1.56122	2.1642	0.407928	0.323346	0.536393	1.2208	7.85792	1.37778	2.48461
PcyM_0003900	0.0966151	0.507935	0.106387	0.115855	0.395695	0.060301	1.37948	0.236979	0.487833
PcyM_0004000	0.198658	0.951244	0.513271	0.149181	0.167142	0.0775065	0.0257847	0.554391	0.104903
PcyM_0004100	0.17644	0.728723	0.147535	0.101217	0.256018	0.102352	0.133865	0.350899	0.148363
PcyM_0004200	0.605044	1.18949	0.197855	0.28185	0.410283	0.108553	0.130072	0.66413	0.23269
PcyM_0004300	0.233446	0.594759	0.146798	0.0852242	0.230838	0.138309	0.146428	0.325001	0.1502
PcyM_0004400	2.34894	3.06988	0.359992	7.23051	4.28469	0.625048	0.846519	1.92627	3.24669	PVX_001610, variable surface protein Vir25-related
PcyM_0004500	0.613324	1.1731	0.0925415	0.261533	0.490197	0.109403	0.131789	0.626323	0.24823
PcyM_0004600	1.49335	2.86039	1.46507	0.356133	1.09015	0.733752	0.0955228	1.9396	0.56889
PcyM_0004700	0.0618704	0.3231	0.273728	0.011125	0.0383038	0.00664611	0.0160288	0.219566	0.0180259
PcyM_0004800	2.10819	2.23499	1.37178	2.11012	1.75368	0.133962	0.0282975	1.90499	1.00651
PcyM_0004900	3.85972	0.947068	0.171848	0.0296587	0.106269	0.0447444	0.0617653	1.65954	0.0606093
PcyM_0005000	0.0834107	0.142275	0.0612927	10.2313	0.0614163	0.0309325	0.0186765	0.0956593	2.58558
PcyM_0005100	0.307767	0.474328	0.142487	0.102669	0.117058	0.0723899	0.141803	0.308194	0.10848
PcyM_0005200	0.351746	1.17105	0.64688	0.163113	0.245013	0.222143	0.358894	0.723226	0.247291
PcyM_0005300	0.352088	0.951131	0.349536	0.459726	0.366425	0.160237	0.0709251	0.550919	0.264328
PcyM_0005400	1.96301	3.72392	0.442402	0.872283	1.17842	0.489308	0.245775	2.04311	0.696447
PcyM_0005500	0.34702	1.95564	0.606181	0.814285	0.862859	0.11579	0.199637	0.969613	0.498143
PcyM_0005600	1.51656	0.939137	0.668346	0.70679	0.790761	0.660702	0.753147	1.04135	0.72785	PVX_104190, unspecified product
PcyM_0005700	0.336115	0.945213	0.045832	0.105996	0.630505	0.0529777	0.0935869	0.442387	0.220766
PcyM_0005800	0.903459	2.82693	0.535205	0.63141	1.08315	1.06172	0.847882	1.42187	0.906042
PcyM_0005900	1.32833	3.1298	2.47885	0.223849	0.413768	0.443606	0.772102	2.31233	0.463331
PcyM_0006000	0.123643	0.375818	0.123655	0.146343	0.127666	0.0937115	0.0817941	0.207705	0.112379
PcyM_0006100	0.167048	0.0817897	0.369244	0.0789097	0.0962901	0.0442555	0.145332	0.206027	0.0911969
PcyM_0006200	0.71194	2.02937	2.03206	1.20023	1.06037	0.489202	1.96301	1.59112	1.1782	PVX_078695, unspecified product
PcyM_0006300	25.5324	2.2299	3.53491	0.49131	0.149791	0.863866	0.0549127	10.4324	0.38997
PcyM_0006400	0.638816	1.21408	0.149003	0.201604	0.445575	0.12283	0.0520961	0.667299	0.205526
PcyM_0006500	2.91121	4.92643	1.36574	1.402	2.2423	0.867062	0.840606	3.06779	1.33799
PcyM_0006600	2.32545	1.95134	0.880743	0.379739	1.05535	0.423698	0.867737	1.71918	0.681631
PcyM_0006700	1.96476	1.28491	0.455445	0.951749	0.424037	0.526909	0.096769	1.23504	0.499866
PcyM_0006800	0.297278	1.48955	4.10281	0.127911	0.302641	0.505505	0.0761251	1.96321	0.253045
PcyM_0006900	0.859484	2.3373	0.239266	0.00742277	0.0228264	0.00425135	0.0103898	1.14535	0.0112226
PcyM_0007000	9.25942	29.5576	6.95894	3.4894	12.1529	10.1698	11.8384	15.2587	9.41263
PcyM_0007100	3.98398	0.1954	0.209789	0.0348433	0.106293	0.194628	0.385601	1.46306	0.180341
PcyM_0007200	0.18445	0.31689	0.120734	0.1461	0.129091	0.0683447	0.0310137	0.207358	0.0936373
PcyM_0007300	0.316811	0.34583	0.140824	0.0595189	0.0719036	0.0323938	0.282974	0.267822	0.111697
PcyM_0007400	0.494714	1.15082	0.580515	0.144628	0.283881	0.22841	0.314005	0.742018	0.242731
PcyM_0007500	0.0857922	0.226051	0.0735069	0.133626	0.0713401	0.0297173	0.0859786	0.12845	0.0801656
PcyM_0007600	1.95912	3.72501	0.344915	0.860261	1.0753	0.306043	0.247618	2.00968	0.622305
PcyM_0007700	2.22913	2.99044	0.919919	0.477158	0.636675	0.327476	0.702958	2.04649	0.536067	PVX_096937, VIR protein, pseudogene
PcyM_0007800	0.666656	2.37685	11.9719	0.20797	0.616193	0.250087	0.247986	5.00515	0.330559
PcyM_0007900	0.317889	1.73292	4.4811	0.154339	0.293784	0.05173	0.0999325	2.1773	0.149946
PcyM_0008000	7.19392	2.04123	0.311754	0.572589	0.965133	0.0593951	0.189711	3.1823	0.446707
PcyM_0008100	1.54168	0.702955	0.172294	0.331298	1.0599	0.483355	0.207814	0.805642	0.520592
PcyM_0008200	0.226106	0.95399	0.190318	0.12822	0.208859	0.240946	0.0802105	0.456805	0.164559
PcyM_0008300	0.344388	2.6224	1.70663	0.181578	0.845002	0.183681	0.287321	1.55781	0.374396
PcyM_0008400	0.516457	1.11844	0.232051	0.212161	0.249226	0.205876	0.0388995	0.622316	0.176541
PcyM_0008500	1.2355	0.702056	0.102672	0.195126	0.209942	0.140265	0.028028	0.680076	0.14334
PcyM_0008600	9.08464	6.36011	2.20177	1.54584	3.87008	1.85569	1.90283	5.88217	2.29361
PcyM_0008700	0.0755877	0.565058	0.170566	0.0730398	0.139091	0.169701	0.0995922	0.270404	0.120356
PcyM_0008800	0.0232042	0.0730342	0.0406993	0.0171832	0.0556875	0.00235993	0.0108385	0.0456459	0.0215173
PcyM_0008900	0.0136387	0.0407188	0.00865523	0.00910415	0.0262721	0.0288681	0.0143393	0.0210042	0.0196459
PcyM_0009000	0.188171	0.576198	0.099787	0.140353	0.204655	0.0501882	0.162441	0.288052	0.139409
PcyM_0009100	0.936551	3.1359	0.26828	0.459959	2.11025	0.456635	0.132918	1.44691	0.789941
PcyM_0009200	0.450536	0.953359	0.292895	0.172138	0.866447	0	0.0666958	0.565597	0.27632
PcyM_0009300	0.80047	1.08545	0.489959	0.25464	0.498681	0.327217	0.850395	0.79196	0.482734
PcyM_0009400	2.51547	3.79672	4.9448	0.499212	0.47199	0.60872	1.07845	3.75233	0.664594
PcyM_0009500	0.367766	0.4389	0.383656	0.181853	0.165521	0.222519	1.25957	0.396774	0.457365
PcyM_0009600	0.230519	0.70388	0.160929	0.109875	0.144947	1.08249	0.0505297	0.365109	0.346962
PcyM_0009700	0.0976582	0.813061	0.0322582	0.0540623	0.191324	0.169906	0.0143805	0.314326	0.107418
PcyM_0009800	0.742967	3.31514	1.19525	0.633726	0.803008	0.602625	0.669385	1.75112	0.677186
PcyM_0009900	7.86435	1.76105	1.34156	0.343281	0.63482	0.511368	0.309272	3.65565	0.449685
PcyM_0010000	1.00869	2.69728	1.41834	0.548159	0.253584	0.63103	1.46182	1.70811	0.723649
PcyM_0010100	0.795786	1.74048	0.84318	0.150972	0.482537	0.270657	0.0470125	1.12648	0.237795
PcyM_0010200	0.194634	0.0815474	0.0977132	0.0246223	0.0473195	0.0862559	0.0476131	0.124632	0.0514527
PcyM_0010300	12.8773	41.4254	6.67274	4.44804	16.9922	13.9715	16.6435	20.3251	13.0138	PVX_096004, VIR protein
PcyM_0010400	0.0166729	0.0825763	0.010642	0.0271552	0.0327457	0.00644619	0.0165101	0.0366304	0.0207143
PcyM_0010500	59.8328	616.628	980.243	292.826	294.497	150.686	660.303	552.235	349.578
PcyM_0010600	0.321532	0.570146	0.152743	0.121148	0.187921	0.237916	0.148203	0.34814	0.173797
PcyM_0010700	0.0493002	0.0493409	0.00200987	0.0127502	0.0137121	0.0129061	0.00951014	0.0335503	0.0122196
PcyM_0010800	1.49444	5.00442	1.2932	1.98383	2.05227	0.528663	0.564934	2.59735	1.28242
PcyM_0010900	1.43086	2.0761	1.09258	0.209577	0.32231	0.223827	0.17683	1.53318	0.233136
PcyM_0011000	64.0559	660.209	1049.88	313.406	315.312	161.964	706.668	591.382	374.337
PcyM_0011100	4.99767	16.2058	7.58484	1.99319	4.86848	1.4339	2.21384	9.59611	2.62735
PcyM_0011200	9.24542	108.135	20.4385	28.3779	18.5018	25.4662	37.2063	45.9395	27.3881
PcyM_0011300	0.66345	0.75832	0.219827	0.125023	0.434724	0.375236	0.150568	0.547199	0.271388
PcyM_0011400	4.55646	28.2144	42.8216	15.7301	16.6039	10.1719	38.7916	25.1975	20.3244
PcyM_0011500	1.05337	1.63426	0.793824	0.362583	0.492776	0.213575	0.457932	1.16048	0.381716
PcyM_0011600	0.216456	0.665497	1.96259	0.832922	0.0833553	0	0.0791654	0.948182	0.248861
PcyM_0011700	0.305871	0.490717	0.262733	0.0724182	0.0736744	0.448658	0.0571694	0.353107	0.16298
PcyM_0011800	0.367828	1.24453	0.166465	0.562295	0.100355	0.0913049	0.146583	0.592941	0.225134
PcyM_0011900	5.4107	2.77693	2.32953	1.1194	2.32779	1.28971	1.44529	3.50572	1.54555
PcyM_0012000	4.76047	0.883532	0.874052	0.538118	0.447333	0.186869	0.852783	2.17269	0.506276	PVX_078695, unspecified product
PcyM_0012100	9.00957	3.35003	2.05233	0.223488	1.39017	2.40964	1.96046	4.80397	1.49594
PcyM_0012200	2.41076	3.64781	0.681784	0.476613	0.801928	0.279214	0.229337	2.24678	0.446773
PcyM_0012300	25.0774	23.23	48.7151	0.457938	4.53818	0.20213	0.157739	32.3408	1.339
PcyM_0012400	0.583248	2.51319	41.511	0.452031	0.548408	0.101274	0.271952	14.8691	0.343416
PcyM_0012500	0.38587	1.0018	0.322026	0.250777	0.345666	0.0942969	0.385708	0.5699	0.269112	PVX_112710, unspecified product
PcyM_0012600	0.00909119	0.102895	0	0.0190426	0.0718903	0.0250673	0.0090274	0.0373288	0.0312569
PcyM_0012700	0.00806764	0.0742866	0.0951548	0.0201442	0.124585	0.0927928	0.050246	0.0591697	0.0719419	PVX_112705, unspecified product
PcyM_0012800	0.588407	1.63834	0.0889017	0.0762005	0.391169	0.170571	0.229947	0.771883	0.216972	PVX_112700, unspecified product
PcyM_0012900	0	0.128964	0.146196	0.0451583	0.0314388	0.0185042	0.0200686	0.0917199	0.0287925
PcyM_0013000	1.22411	2.36692	0.537718	0.765539	0.626691	1.45474	0.411514	1.37625	0.814622
PcyM_0013100	0.00642604	0.0384704	0.00296887	0.0540653	0.0534813	0.0813169	0.140944	0.0159551	0.0824519	PVX_112670, unspecified product
PcyM_0013200	0.0362806	0.118196	0.0321994	0.0113772	0.0330164	0.0122897	0.0114143	0.0622253	0.0170244
PcyM_0013300	0.0959534	0.0883134	0.0920347	0.0210415	0.0218031	0.10089	0.164071	0.0921005	0.0769513
PcyM_0013400	0.213355	0.288684	0.145133	0.112913	0.241874	0.172803	0.228677	0.215724	0.189067	PVX_112655, unspecified product
PcyM_0013500	0.194853	1.54904	2.58568	0.254154	0.401737	0.311421	0.996781	1.44319	0.491023	PVX_112650, unspecified product
PcyM_0013600	0.267715	3.14921	2.55865	0.198098	0.115115	0.498533	1.53874	1.99186	0.58762
PcyM_0013700	4.25608	19.3757	2.09926	4.03373	5.91887	1.96879	2.57934	8.57701	3.62518
PcyM_0013800	9.58437	9.06365	6.37606	1.25891	6.38435	5.72436	6.70569	8.34136	5.01833	PVX_112635, unspecified product
PcyM_0013900	0.0360182	0.0809417	0.0439083	0.0147268	0.0213947	0.0185955	0.0114104	0.0536227	0.0165319
PcyM_0014000	0.15184	0.481824	0.454026	0.268773	0.238228	0.0921682	0.441508	0.362563	0.260169	PVX_078695, unspecified product
PcyM_0014100	23.5676	20.2804	1.0467	0.0569745	0.171303	0.0712419	0.0303985	14.9649	0.0824794
PcyM_0014200	1.4117	2.13925	3.74414	0.868308	0.928893	0.759806	2.31191	2.43169	1.21723
PcyM_0014300	0.334108	0.766469	0.208559	0.101107	0.20116	0.208196	0.238574	0.436379	0.187259
PcyM_0014400	1.49089	2.5082	0.470903	0.681799	1.07453	0.0489372	0.24348	1.48999	0.512186
PcyM_0014500	0.752005	2.48036	0.454661	0.494011	0.604178	1.34692	0.750152	1.22901	0.798814
PcyM_0014600	4.64331	5.61344	1.34719	1.75447	4.05299	0.566623	0.333463	3.86798	1.67689
PcyM_0014700	0.170569	0.173617	0.0975344	0.0398913	0.0351235	0.0205835	0.0324045	0.14724	0.0320007
PcyM_0014800	0.0908471	0.223567	0.138981	0.0620341	0.0450037	0	0.0497105	0.151132	0.0391871
PcyM_0014900	0.015722	0.0499671	0.0369749	0.0156341	0.0158477	0.0372014	0.0285066	0.0342213	0.0242975
PcyM_0015000	0.368786	3.79341	0.522826	0.642355	0.914173	0.133789	0.676699	1.56167	0.591754
PcyM_0015100	1.95439	2.19735	0.227979	0.479076	1.31743	0.329834	3.58206	1.45991	1.4271
PcyM_0015200	0.815006	1.50907	0.251626	0.336568	1.00586	0.122283	0.173325	0.858566	0.409509
PcyM_0015300	0.792665	1.49157	0.286936	0.57893	1.37482	0.311289	1.4234	0.857056	0.922111
PcyM_0015400	1.33536	1.09756	0.287897	0.357341	0.584086	0.126324	0.0246057	0.906939	0.273089
PcyM_0015500	0.444972	0.776345	0.204531	0.152912	0.179316	0.095476	0.19266	0.475282	0.155091
PcyM_0015600	0.874462	2.13997	0.487317	0.340545	0.462769	0.348942	0.956645	1.16725	0.527225
PcyM_0015700	0	0.156516	0.0413782	0.0126957	0.0126401	0	0.0350021	0.0659648	0.0150845
PcyM_0015800	0.538443	1.24743	0.267711	0.250497	0.481007	0.04149	0.154419	0.684529	0.231853
PcyM_0015900	0.345996	0.76477	0.274106	0.358805	0.450725	0.163556	0.197213	0.461624	0.292575
PcyM_0016000	0.879693	0.685045	0.260414	0.109605	0.238898	0.118555	0.169144	0.608384	0.159051
PcyM_0016100	0.202467	0.274681	1.27374	0.100531	0.180611	0.0426724	0.0419046	0.583628	0.0914296
PcyM_0016200	0.0768062	0.253996	0.128073	0.0605696	0.0733253	0.012541	0.0355815	0.152958	0.0455044
PcyM_0016300	0.127048	1.12632	0.870067	0.221324	0.367765	0.518587	1.23892	0.707811	0.58665
PcyM_0016400	0.259547	1.92037	0.248721	0.110191	0.144371	0.0762367	0.0403262	0.809547	0.0927812
PcyM_0016500	1.09858	8.03642	2.0375	0.390306	0.924682	1.98342	3.58554	3.72416	1.72099	PVX_078695, unspecified product
PcyM_0016600	0.736588	2.31218	2.14592	1.30831	1.11669	0.435965	2.08838	1.73156	1.23734	PVX_078695, unspecified product
PcyM_0016700	0.215211	1.95504	0.0798303	0.114224	0.402136	0	0.251037	0.750027	0.191849
PcyM_0016800	0.0517527	0.229473	0.0475364	0.0392121	0.103197	0.0393609	0.0101119	0.109587	0.0479705
PcyM_0016900	0.388491	1.54871	0.210003	0.136009	0.166901	0.0785431	0.16784	0.715734	0.137323
PcyM_0017000	0.214478	0.87025	1.07062	0.165064	0.27299	0.142142	0.372609	0.718449	0.238201
PcyM_0017100	1.19214	2.57708	1.8505	0.537869	0.603608	0.299815	0.720887	1.87324	0.540545
PcyM_0017200	0.0304902	0.0816435	0.0218786	0.0312895	0.0164615	0.0176436	0.149063	0.0446708	0.0536144
PcyM_0017300	0.1253	0.372027	0.346385	0.2216	0.186299	0.0711237	0.335089	0.281237	0.203528	PVX_078695, unspecified product
PcyM_0017400	21.0279	17.2175	1.64106	0.0638449	0.198573	0.0863279	0.0357268	13.2955	0.0961181
PcyM_0017500	0.607173	0.931171	0.0865606	0.202202	0.448632	0.102333	0.114242	0.541635	0.216852
PcyM_0017600	0.992802	2.50293	2.39785	0.473482	0.874331	0.142633	0.318259	1.96452	0.452176
PcyM_0017700	0.392391	0.23342	0.0557978	0.133955	0.0662918	0.0330768	0.0585287	0.227203	0.0729631
PcyM_0017800	0.05725	0.294999	0.026915	0.0165818	0.0675692	0.0180759	0.013235	0.126388	0.0288655
PcyM_0017900	0.500513	2.08886	0.536962	0.197982	0.660879	0.151994	0.167203	1.04211	0.294515
PcyM_0018000	3.0754	4.07938	1.40129	0.628776	2.01051	0.941719	1.30983	2.85202	1.22271	PVX_003490, VIR protein
PcyM_0018100	0.0360662	0.146107	0.0716617	0.0397707	0.0289397	0	0.440445	0.0846117	0.127289
PcyM_0018200	0.065982	0.114663	0.0365886	0.0566084	0.106247	0.195342	0.13277	0.0724113	0.122742	PVX_241290, unspecified product
PcyM_0018300	0.0953266	0.188422	0.0574813	0.0450241	0.043254	0.0178924	0.0264214	0.113743	0.033148	PVX_002480, variable surface protein Vir12/24-related
PcyM_0018400	2.54484	4.71798	0.536297	1.56567	3.54944	0.826899	0.901035	2.59971	1.71076
PcyM_0018500	0.711461	0.83367	0.0867138	0.169011	0.45091	0.43371	0.236893	0.543948	0.322631
PcyM_0018600	0.199539	0.33863	0.0499245	0.0463249	0.0435631	0.0214518	0.0381771	0.196031	0.0373792
PcyM_0018700	0.493946	1.25879	0.111824	0.116859	0.319176	0.125606	0.133145	0.621522	0.173696
PcyM_0018800	8.17772	9.45264	2.08563	1.84467	3.88301	2.20437	2.30636	6.572	2.5596
PcyM_0018900	0.554132	1.34516	1.4301	0.493316	0.613012	0.394547	1.49424	1.1098	0.748778
PcyM_0019000	0.0426526	0.730876	0.0154653	0.0751616	0.0473961	0.0453661	0.0449903	0.262998	0.0532285
PcyM_0019100	0.0465395	0.0513579	0.00311039	0.0266144	0.0125853	0.0120432	0.0105449	0.0336692	0.0154469
PcyM_0019200	2.55334	2.22997	1.03428	1.42825	0.568876	0.830796	0.425537	1.9392	0.813365
PcyM_0019300	0.451235	0.708903	0.241195	0.267517	0.410323	0.216843	0.13341	0.467111	0.257023
PcyM_0019400	1.13795	2.15459	4.89113	2.93857	1.05064	0.294979	0.714619	2.72789	1.2497
PcyM_0019500	0.418956	1.19103	0.754556	0.2002	0.409013	0.240843	0	0.788182	0.212514
PcyM_0019600	1.50721	4.08653	1.33294	0.7648	1.04089	0.220566	0.836412	2.3089	0.715667	PVX_001610, variable surface protein Vir25-related
PcyM_0019700	0.328213	0.772189	0.154443	0.101421	0.2169	0.165719	0.19612	0.418282	0.17004
PcyM_0019800	0.138697	0.573349	0.164906	0.119069	0.279009	0.0436373	0.127117	0.292317	0.142208
PcyM_0019900	0.684942	0.740838	0.805697	0.225717	0.270933	0.293687	0.108962	0.743825	0.224825
PcyM_0020000	1.49654	11.2337	0.22375	0.423176	1.9428	0.185931	0.657929	4.31799	0.802459
PcyM_0020100	0.189539	0.547946	0.228892	0.230654	0.177216	0.0198231	0.0792868	0.322126	0.126745
PcyM_0020200	1.07663	1.47073	3.47269	0.164547	0.15315	0.108246	0.065844	2.00669	0.122947
PcyM_0020300	0.239715	0.66873	0.459908	0.0897623	0.190256	0.104691	0.423565	0.456117	0.202068
PcyM_0020400	0.680747	1.59985	0.423126	0.758007	0.389635	0.293494	0.898524	0.901241	0.584915
PcyM_0020500	1.85021	3.25305	0.309096	0.80219	1.03036	0.393045	0.263145	1.80412	0.622185
PcyM_0020600	1.9784	2.0931	0.129726	0.370465	0.913603	0.201119	0.0472231	1.40041	0.383103
PcyM_0020700	0.915948	0.707198	0.163412	0.288758	0.410325	0.224228	0.363455	0.59552	0.321692
PcyM_0020800	0.828002	2.10992	27.5431	0.118395	0.682662	0.256912	0.203517	10.1604	0.315371
PcyM_0020900	2.36889	3.89205	1.92458	0.442912	1.74605	1.42745	1.28823	2.7285	1.22616
PcyM_0021000	0.726054	0.697767	0.711365	0.11713	0.344137	0.101584	0.12752	0.711729	0.172593
PcyM_0021100	0.0771835	0.12068	0.0665343	0.0475323	0.124785	0.0116993	0.472655	0.0881327	0.164168
PcyM_0021200	0.0928703	0.191536	0.193051	0.0582267	0.076026	0.00407385	0.0399953	0.159152	0.0445805
PcyM_0021300	0.11784	0.348235	0.35311	0.213161	0.180541	0.0715297	0.346988	0.273062	0.203055	PVX_078695, unspecified product
PcyM_0021400	25.0645	1.08002	0.589363	0.682222	0.243965	0.142369	0.0645562	8.9113	0.283278
PcyM_0021500	0.38657	0.667353	0.159985	0.168079	0.285994	0.101589	0.0676432	0.404636	0.155827
PcyM_0021600	0.022437	0.0264775	0.00764479	0.00747095	0.0470849	0.0437574	0.0142493	0.0188531	0.0281406
PcyM_0021700	0.0167723	0.0592739	0.0270058	0.0218162	0.0130616	0.0283677	0.00893482	0.0343507	0.0180451
PcyM_0021800	0.310424	2.95433	0.322313	0.425713	1.13818	1.23966	0.785117	1.19569	0.897168
PcyM_0021900	2.05905	3.54972	0.319912	0.905409	1.14392	0.357592	0.246789	1.97623	0.663427
PcyM_0022000	0.500119	1.25215	0.305782	0.977344	0.242665	0	0.236248	0.686017	0.364064
PcyM_0022100	4.05855	1.00087	0.123377	0.18955	0.149942	0.374574	0.173854	1.7276	0.22198
PcyM_0022200	0.0271381	0.742388	0.132412	0.111122	0.130918	1.29798	0.0184763	0.300646	0.389625
PcyM_0022300	2.64821	4.56079	0.34673	0.80491	1.14351	0.265327	0.222304	2.51858	0.609013
PcyM_0022400	5.82062	6.37312	3.85521	1.26816	4.40849	2.00165	2.56139	5.34965	2.55992
PcyM_0022500	0.0857687	0.127946	0.0436567	0.0259715	0.031802	0.14603	0.179625	0.0857904	0.0958572
PcyM_0022600	3.87421	2.55342	1.49637	1.28074	1.29179	1.78624	0.489938	2.64133	1.21218
PcyM_0022700	1.08573	0.85392	0.377655	0.164644	0.0710555	0	0	0.772436	0.0589249
PcyM_0022800	0.0308313	0.0628697	0.0162855	0.0140727	0.0176448	0.0638277	0.0022497	0.0366622	0.0244487
PcyM_0022900	0.111282	0.232125	0.213818	0.0973446	0.303657	0	0.0186503	0.185741	0.104913
PcyM_0023000	5.61043	4.35843	0.414416	0.13383	0.774995	0.46507	0.423165	3.46109	0.449265
PcyM_0023100	0.159375	0.43646	0.130753	0.0628377	0.192977	0.110342	0.116335	0.242196	0.120623
PcyM_0023200	1.36026	1.33769	0.223133	0.406742	0.577616	0.298915	0.504968	0.973692	0.44706
PcyM_0023300	3.52858	5.61525	1.23321	1.05208	1.91359	1.76105	1.09822	3.45901	1.45623	PVX_004520, variable surface protein Vir4, putative; PVX_096000, variable surface protein Vir4, putative
PcyM_0023400	0.338889	1.97318	3.75171	0.158374	0.615865	0.142187	0.222972	2.02126	0.28485
PcyM_0023500	0.27468	0.902624	0.152405	0.113934	0.209653	0.144349	0.152822	0.443236	0.155189
PcyM_0023600	2.93241	3.30248	0.286686	7.96555	5.66109	0.463169	0.903111	2.17386	3.74823
PcyM_0023700	1.19915	2.76386	0.782874	0.635713	0.887187	0.101818	0.150278	1.58196	0.443749
PcyM_0023800	0.0669576	0.21672	0.12218	0.043579	0.0475621	0	0.0276206	0.135286	0.0296904
PcyM_0023900	0.146744	0.252448	0.0519055	0.102343	0.0809939	0.106307	0.0583831	0.150366	0.0870066
PcyM_0024000	1.02844	1.03207	17.8716	0.256559	0.557853	0.201293	0.140327	6.64404	0.289008
PcyM_0024100	0.139412	0.541322	0.119236	0.0875771	0.135457	0.127041	0.0296362	0.266657	0.0949278
PcyM_0024200	0.172708	0.410537	7.49893	0.353805	0.202479	0.122569	0.110302	2.69406	0.197289
PcyM_0024300	1.82208	2.71755	1.32315	0.859525	0.857235	1.33005	1.5549	1.95426	1.15043
PcyM_0024400	0.416523	1.61066	5.28736	0.0354673	0.274374	0.032931	0.0239853	2.43818	0.0916893
PcyM_0024500	0.0796686	1.25303	0.0489028	0.216804	0.121373	0.032345	0.164939	0.460533	0.133865
PcyM_0024600	0.874815	1.76402	0.974281	0.302161	0.560762	0.313288	0.131842	1.20437	0.327013
PcyM_0024700	2.96463	3.00632	0.681584	0.702826	0.713545	0.849648	1.07984	2.21751	0.836464
PcyM_0024800	1.26935	3.63362	0.309564	0.579202	2.55252	0.49121	0.162341	1.73751	0.946319
PcyM_0024900	1.7042	6.92113	1.45254	1.21594	1.5548	0.779211	0.432809	3.35929	0.99569
PcyM_0025000	0.606977	1.19503	0.134416	0.253804	0.429167	0.125038	0.0773939	0.645475	0.221351
PcyM_0025100	1.12835	2.93302	0.835231	0.63	0.72114	0.162059	0.142223	1.6322	0.413856
PcyM_0025200	1.55957	2.47685	0.271199	0.906053	1.74607	0.440661	3.5882	1.43587	1.67025
PcyM_0025300	0.803285	1.61265	0.810165	0.203815	0.560297	0.0286697	0.261426	1.07537	0.263552
PcyM_0025400	0.457847	0.402041	0.0983	0.134481	0.210346	0.103708	0.181967	0.319396	0.157626
PcyM_0025500	1.29097	1.08123	0.0109696	0.435844	0.924521	0.819928	0.0976645	0.794389	0.569489
PcyM_0025600	0.145791	0.411724	0.106829	0.10835	0.225916	0.0299762	0.102436	0.221448	0.116669
PcyM_0025700	0.0129651	0.116314	0.00862111	0.00916893	0.0290441	0.00695764	0.0156808	0.0459667	0.0152129
PcyM_0025800	18.9121	34.4414	42.818	3.75252	14.1623	11.461	13.8324	32.0571	10.8021
PcyM_0025900	0.216636	0.237652	0.337534	0.0533578	0.150923	0.483921	0.65678	0.26394	0.336246
PcyM_0026000	0.184608	0.308617	0.155442	0.155616	0.130096	0.0679408	0.0476302	0.216222	0.100321
PcyM_0026100	3.71411	7.05865	0.502732	1.14916	3.32	0.301515	0.328369	3.7585	1.27476
PcyM_0026200	0.473656	0.968005	0.281427	0.376029	0.234982	0.175245	0.925959	0.574363	0.428054
PcyM_0026300	0.728396	1.83006	0.406773	0.350329	0.460064	0.307992	0.895037	0.988411	0.503355
PcyM_0026400	0	0.275182	0.0873057	0.038319	0.0417617	0.0102852	0.0689147	0.120829	0.0398201
PcyM_0026500	275.393	491.968	14.9888	124.681	252.273	33.032	40.9329	260.783	112.73	PVX_086870, VIR protein, pseudogene
PcyM_0026600	0.0819798	0.230414	0.166636	0.039668	0.0675843	0.0400168	0.0603064	0.159677	0.0518938
PcyM_0026700	0.437318	2.0413	2.37556	0.130973	0.643527	0.227304	0.23205	1.61806	0.308464
PcyM_0026800	1.89638	2.2187	1.15983	0.220596	0.53425	0.228397	0.375263	1.75831	0.339627
PcyM_0026900	0.368643	0.662395	0.0770331	0.119631	0.221994	0.0657577	0.0446229	0.369357	0.113001
PcyM_0027000	0.349565	0.821777	0.806694	0.740034	0.308403	0.189669	2.15169	0.659345	0.847448
PcyM_0027100	0.126318	0.287319	0.150131	0.080097	0.0777249	0.042546	0.0379911	0.187923	0.0595898
PcyM_0027200	0.718469	1.26619	0.27502	0.174896	0.669085	0.182129	0.620536	0.753227	0.411662
PcyM_0027300	0.463611	0.568514	2.57388	0.0902664	0.160244	0.0622145	0.323245	1.202	0.158992
PcyM_0027400	0.499316	0.329031	0.441783	0.141425	0.33933	0.0860823	0.255911	0.423376	0.205687
PcyM_0027500	0.142109	0.554146	0.212068	0.101359	0.0797051	0.00846015	0.0477964	0.302774	0.0593302
PcyM_0027600	1.77492	7.50957	1.44579	0.311755	1.3751	2.70173	2.92334	3.57676	1.82798	PVX_090290, variable surface protein Vir12, putative
PcyM_0027700	0.928181	1.95262	0.97612	0.279293	0.5619	0.383659	1.65074	1.28564	0.718899
PcyM_0027800	0.156744	1.23163	0.129641	0.0458818	0.164316	0.0889193	0.130344	0.506005	0.107365
PcyM_0027900	0.031828	0.807326	0.252974	0.117355	0.121299	0.205556	0.0172997	0.364043	0.115377
PcyM_0028000	12.4546	24.4478	12.036	0.895436	0.774641	0.40849	1.31115	16.3128	0.847429
PcyM_0028100	2.45383	3.55486	2.34368	0.529397	0.291819	0.270021	0.943765	2.78412	0.50875
PcyM_0028200	0.624366	0.96534	0.300523	0.217562	0.533496	0.178807	0.399008	0.630077	0.332218
PcyM_0028300	0.442458	1.47753	2.44346	1.23798	1.67667	0.287904	1.48035	1.45448	1.17073	PVX_078695, unspecified product
PcyM_0028400	18.0557	11.6938	11.7431	0.228087	0.0832814	0.0533537	0.0289015	13.8309	0.0984059	PVX_241290, unspecified product
PcyM_0028500	5.41631	3.86551	0.37428	0.748482	2.78265	2.55747	1.31434	3.2187	1.85074
PcyM_0028600	2.89592	2.78362	0.840968	0.566582	0.987116	0.197032	0.826133	2.1735	0.644216
PcyM_0028700	0.371925	0.996393	0.12799	0.305866	0.171775	0.0664582	1.01267	0.49877	0.389191
PcyM_0028800	1.53148	4.25984	0.172144	0.63652	0.834056	0.393137	0.213912	1.98782	0.519406
PcyM_0028900	0.031514	1.68512	0	0.0599598	0.132467	0.00795612	0.0919273	0.57221	0.0730774
PcyM_0029000	3.15708	32.6116	6.02086	11.0136	11.5224	0.717909	3.00748	13.9298	6.56536
PcyM_0029100	1.58612	2.46904	1.4149	0.512985	0.412793	0.280982	0.379753	1.82336	0.396628
PcyM_0029200	0.562906	1.11452	0.121685	0.177661	0.294104	0.153826	0.569432	0.599705	0.298756
PcyM_0029300	1.43668	1.39602	0.202706	0.145995	0.135626	0.0996127	0.0423459	1.0118	0.105895
PcyM_0029400	0.170012	0.685142	0.086635	0.441741	0.912934	0.0244312	0.246031	0.313929	0.406284
PcyM_0029500	2.44297	3.02864	0.308555	7.44003	4.49083	0.424717	0.900012	1.92672	3.3139	PVX_001610, variable surface protein Vir25-related
PcyM_0029600	1.31621	1.29752	0.58	0.173301	0.376643	0.164607	0.148053	1.06458	0.215651
PcyM_0029700	0.786324	5.12522	0.522534	0.430459	0.46435	0.257128	0.794322	2.14469	0.486565
PcyM_0029800	0.0258709	0.0938994	0.00790186	0.00983461	0.0246754	0.0509381	0.0157311	0.0425574	0.0252948
PcyM_0029900	9.30139	29.8549	5.49527	3.24353	12.302	10.3438	12.0559	14.8839	9.48632
PcyM_0030000	0.370863	1.76638	0.0838947	0.287296	0.158888	0.185245	0.540222	0.740381	0.292913
PcyM_0030100	6.68139	0.216466	0.254587	0.0446385	0.111835	0.0671347	0.0860831	2.38415	0.0774228
PcyM_0030200	0.14611	1.55534	0.103744	0.133017	0.111158	0.0585182	0.0370942	0.601732	0.0849468
PcyM_0030300	0.147912	0.269517	0.197017	0.0549043	0.0622002	0.0307957	0.0621423	0.204815	0.0525106
PcyM_0030400	8.95983	11.9059	9.41095	1.42641	6.24612	2.30617	1.86181	10.0922	2.96013
PcyM_0030500	2.3238	1.90899	0.420926	0.768628	0.992307	0.999891	0.687615	1.55124	0.86211
PcyM_0030600	0.188438	0.320077	0.0401557	0.0821371	0.182779	0.0469603	0.016726	0.18289	0.0821505
PcyM_0030700	2.10213	5.15335	1.67026	0.734436	0.926976	0.602535	2.12879	2.97525	1.09819
PcyM_0030800	0.791931	1.06015	0.494333	0.319699	0.498177	0.314219	0.813996	0.78214	0.486523
PcyM_0030900	2.58351	3.97811	0.627509	0.319176	0.566541	0.102656	0.137919	2.39637	0.281573
PcyM_0031000	0.0266864	0.0590506	0.0348797	0.0742592	0.022435	0.0515887	0.0378627	0.0402056	0.0465364
PcyM_0031100	2.05801	5.06883	0.36979	0.921342	1.3452	0.601367	1.08875	2.49888	0.989163
PcyM_0031200	1.73108	2.97244	0.18011	0.575504	0.897464	2.48498	0.358945	1.62788	1.07922
PcyM_0031300	0.124789	0.540415	0.719653	0.107584	0.435392	0.0508991	0.128597	0.461619	0.180618
PcyM_0031400	0.316368	0.3204	0.126812	0.122128	0.309142	0.0184652	0.0691968	0.254526	0.129733
PcyM_0031500	2.23104	3.22832	16.3051	0.309673	1.73923	0.108887	0.452664	7.25482	0.652613
PcyM_0031600	2.57644	3.14098	2.21555	0.401857	0.317431	0.298509	0.457524	2.64432	0.36883
PcyM_0031700	0.0229994	0.0858503	0.0882967	0.0346436	0.0253236	0.0202521	0.0205471	0.0657155	0.0251916
PcyM_0031800	0.51735	0.813164	0.227487	0.180522	0.234984	0.12186	0.253658	0.519333	0.197756
PcyM_0031900	2.88158	5.17132	1.24158	1.3089	1.99793	0.788236	0.7837	3.09816	1.21969
PcyM_0032000	5.54629	2.85975	3.4308	1.11516	2.58374	1.28807	1.47833	3.94561	1.61632
PcyM_0032100	0.486329	0.938461	0.741829	0.308173	0.15294	0.19346	0.196583	0.722206	0.212789
PcyM_0032200	0.17629	0.739262	0.0756128	0.244726	0.565003	0.214501	0.21231	0.330388	0.309135
PcyM_0032300	0.255296	1.69478	0.408854	0.238116	0.487883	0.500953	0.376785	0.786309	0.400934
PcyM_0032400	0.594169	0.762073	0.118408	0.196777	0.283147	0.102041	0.101123	0.49155	0.170772
PcyM_0032500	1.29605	5.02323	0.334103	1.09321	1.79038	0.253491	0.251316	2.2178	0.847098
PcyM_0032600	7.78206	10.1522	4.20505	1.17338	3.07637	1.39677	2.69393	7.37977	2.08511	PVX_066690, unspecified product
PcyM_0032700	0.328875	0.867202	0.311144	0.195881	0.231378	1.78963	0.238551	0.502407	0.61386
PcyM_0032800	1.09165	3.50737	0.26517	0.540628	2.24762	0.461262	0.164144	1.6214	0.853413
PcyM_0032900	0.180923	1.53439	0.526591	0.356042	0.0376028	0.0929037	0.0272142	0.747302	0.128441
PcyM_0033000	1.18617	1.87476	0.428122	0.371801	0.933474	0.351683	0.361942	1.16302	0.504725	PVX_004520, variable surface protein Vir4, putative; PVX_096000, variable surface protein Vir4, putative
PcyM_0033100	0.64946	0.936855	0.520691	0.168056	0.18317	0.113092	0.146114	0.702335	0.152608
PcyM_0033200	0.0495683	0.222705	0.0216212	0.0249481	0.0668239	0.0316971	0.0210386	0.0979649	0.0361269
PcyM_0033300	0.853902	11.0636	0.891558	0.775909	0.609054	0.636834	0.42982	4.26968	0.612904	PVX_088800, variable surface protein Vir4-related
PcyM_0033400	7.62345	37.0515	0.376234	0.412971	0.494961	0.31366	0.466462	15.0171	0.422014	PVX_088797, VIR protein
PcyM_0033500	0.38091	0.560051	0.0834094	0.0371661	0.314548	0.0324129	0.073274	0.341457	0.11435
PcyM_0033600	1.88586	1.14286	0.244413	0.139901	0.596012	0.210072	0.325406	1.09104	0.317848
PcyM_0033700	2.00425	1.11853	0.910068	0.420716	0.35684	0.269106	0.364255	1.34428	0.352729
PcyM_0033800	0.779781	0.875173	0.191774	0.225731	0.303554	0.315925	0.209079	0.615576	0.263572	PVX_053190, unspecified product
PcyM_0033900	0.236856	0.567592	0.0379169	0.0324959	0.447831	0.0420331	0.0130303	0.280788	0.133848
PcyM_0034000	0.796329	3.31209	0.226329	0.321804	0.430648	0.307117	0.307916	1.44492	0.341871
PcyM_0034100	0.838693	1.20038	0.334833	0.221556	0.342095	0.165364	0.369334	0.791301	0.274587
PcyM_0034200	0.534876	1.1034	0.0811733	0.310593	0.4581	0.0959637	0.0901169	0.573151	0.238693
PcyM_0034300	2.1019	2.28983	0.670308	0.168099	0.662325	0.163862	0.224068	1.68735	0.304588
PcyM_0034400	0.0872844	0.696607	0.551749	0.309206	0.245727	0.456994	0.45636	0.445214	0.367072
PcyM_0034500	0.460013	1.16027	0.404606	0.510182	0.423564	0.218816	0.114598	0.674962	0.31679
PcyM_0034600	2.11416	3.84939	0.323758	0.980316	1.15129	0.324715	0.261433	2.09577	0.679438
PcyM_0034700	0.198493	0.738949	0.144937	0.0948595	0.204486	0.174119	0.132015	0.360793	0.15137
PcyM_0034800	0.109557	0.133357	0.0334162	0.0638373	0.0638238	0.00663814	0.021055	0.0921102	0.0388386
PcyM_0034900	2.33555	7.68745	0.802474	0.968312	2.27125	0.359119	0.568233	3.60849	1.04173
PcyM_0035000	0.906058	3.14406	3.08985	0.92965	1.27615	0.348015	1.45165	2.37999	1.00137
PcyM_0035100	0.560211	0.685304	0.362272	0.148601	0.334485	0.202529	0.527023	0.535929	0.30316
PcyM_0035200	0.380501	0.764887	0.0422729	0.47216	0.410365	0.0108199	0.0593963	0.395887	0.238185
PcyM_0035300	0.628947	1.6297	9.9564	0.3591	0.314503	0.219728	0.38539	4.07168	0.31968
PcyM_0035400	0.362317	0.52143	0.967218	0.061717	0.0414014	0.0865736	0.0329916	0.616988	0.0556709
PcyM_0035500	1.65392	0.6846	1.305	4.93977	0.431929	0.217084	0.198161	1.21451	1.44674
PcyM_0035600	2.46725	1.17532	3.0226	0.480584	0.486382	0.321073	0.413671	2.22172	0.425428
PcyM_0035700	0.36414	0.444045	0.215833	0.106712	0.20701	0.152715	0.372761	0.341339	0.2098
PcyM_0035800	7.89935	3.54758	2.66737	2.25001	2.72283	3.71202	0.0708607	4.70477	2.18893	PVX_014630, unspecified product
PcyM_0035900	0.0423118	0.166593	0.122625	0.0462779	0.0440698	0	0.0226693	0.11051	0.0282542
PcyM_0036000	0.0399957	0.0875833	0.0442064	0.0170473	0.0266047	0.0552889	0.0455445	0.0572618	0.0361214
PcyM_0036100	0.448941	1.80792	0.297908	0.515273	0.436682	0.169263	0.236425	0.85159	0.339411
PcyM_0036200	2.71105	4.1052	0.23259	0.669328	1.36874	0.170052	1.02578	2.34961	0.808476
PcyM_0036300	0.214025	1.2315	0.258958	0.144346	0.20037	0.249825	0.0532756	0.568162	0.161954
PcyM_0036400	0.641802	1.43693	11.4662	0.170202	0.444337	0.242344	0.504717	4.51499	0.3404
PcyM_0036500	0.433918	0.753043	0.197082	0.273813	0.398059	0.200509	0.162893	0.461348	0.258818
PcyM_0036600	2.24898	4.01165	0.334826	0.93589	1.14197	0.349771	0.238506	2.19848	0.666534
PcyM_0036700	0.831353	1.80225	0.317228	0.340062	0.463646	0.341295	0.99089	0.983609	0.533974
PcyM_0036800	0.308333	1.1808	0.151545	0.092733	0.105097	0.0650675	0.131299	0.546893	0.0985492
PcyM_0036900	2.02029	1.56041	0.909865	0.910951	0.90518	0.931809	0.980323	1.49686	0.932066	PVX_096937, VIR protein, pseudogene
PcyM_0037000	0.451224	1.55229	0.856624	0.287039	0.319791	0.170842	0.214228	0.953379	0.247975
PcyM_0037100	0.151786	1.95963	0.197827	0.225185	0.0656046	0	0.0775149	0.769747	0.0920763
PcyM_0037200	0.270235	0.704808	0.158028	0.0879701	0.191177	0.146113	0.194432	0.37769	0.154923
PcyM_0037300	2.15489	3.36031	0.903101	1.43259	1.27363	0.435718	0.99401	2.13943	1.03399
PcyM_0037400	0.0376955	0.129643	0.0324489	0.0167852	0.0134473	0.0058051	0.0143022	0.0665957	0.0125849
PcyM_0037500	0.0146247	0.0441317	0.0219254	0.0177489	0.0113661	0.0230312	0.057886	0.026894	0.027508
PcyM_0037600	0.00952272	0.0233474	0.03938	0.00168028	0.00114999	0.0844007	0.00173323	0.0240834	0.0222411
PcyM_0037700	8.12424	10.4212	4.16712	7.42827	6.82703	2.42844	2.41236	7.57084	4.77402
PcyM_0037800	0	0.218813	0.142223	0.0652519	0.0955991	0	0.290835	0.120345	0.112921
PcyM_0037900	0.614356	1.30766	0.434086	0.266945	0.671799	0.110498	0.141938	0.785367	0.297795
PcyM_0038000	1.80368	3.59017	0.780309	0.787611	1.56498	0.461206	0.536284	2.05805	0.837519
PcyM_0038100	0.384718	0.89291	0.330699	0.139009	0.263197	0.100178	0.229862	0.536109	0.183062
PcyM_0038200	0.444981	0.826896	0.0923969	0.271187	0.428411	0.0835772	0.0580598	0.454758	0.210309
PcyM_0038300	3.17947	4.67707	0.520522	1.89882	4.06686	0.749349	0.722475	2.79235	1.85938	PVX_066690, unspecified product
PcyM_0038400	0.312992	0.845091	0.199795	0.124681	0.225401	0.16	0.19022	0.452626	0.175076
PcyM_0038500	2.50553	3.04668	2.7502	7.67657	4.50474	0.411165	0.916379	2.76747	3.37721	PVX_001610, variable surface protein Vir25-related
PcyM_0038600	1.57985	3.13166	0.901271	0.572605	1.04962	0.612068	1.85485	1.87093	1.02229
PcyM_0038700	0.267952	0.691841	0.139824	0.18662	0.274828	0.147109	0.226295	0.366539	0.208713
PcyM_0038800	1.07109	0.891574	0.154298	0.330518	0.55288	0.246567	0.442351	0.705654	0.393079
PcyM_0038900	0.36147	1.81186	1.52389	0.101628	0.550664	0.124412	0.991729	1.2324	0.442108
PcyM_0039000	0.257952	1.17919	0.446098	0.118923	0.366507	0.270675	0.233333	0.627747	0.24736
PcyM_0039100	0.0996095	0.199207	0.0922321	0.0358971	0.0769053	0.00789765	0	0.13035	0.030175
PcyM_0039200	0.344525	0.673309	0.0723161	0.114177	0.246128	0.082816	0.0444477	0.363383	0.121892
PcyM_0039300	1.35827	2.26095	0.370965	0.259684	13.7421	0.750134	0.472179	1.33006	3.80601
PcyM_0039400	1.62856	6.55986	0.458264	1.11251	1.2036	0.354634	1.33324	2.88223	1.001
PcyM_0039500	0.0313153	0.0588263	0.0324984	0.026507	0.0240498	0.0595907	0.0406795	0.04088	0.0377067
PcyM_0039600	0.0502633	0.115185	0.114866	0.0330772	0.0275475	0	0.0358551	0.0934381	0.02412
PcyM_0039700	2.08762	3.98381	0.332907	0.915289	1.19706	0.356983	0.230896	2.13478	0.675056
PcyM_0039800	0.0592311	0.487569	0.172997	0.108722	0.119729	0.013197	0.162117	0.239932	0.100941
PcyM_0039900	0.696369	1.42037	0.373237	0.271447	0.397761	0.288039	0.878173	0.829991	0.458855
PcyM_0040000	0.0882528	0.457272	0.216528	0.122657	0.200328	0.186635	0.0247305	0.254018	0.133588
PcyM_0040100	0.441044	0.596616	0.260076	0.119058	0.282038	0.173691	0.448504	0.432579	0.255823
PcyM_0040200	1.25656	2.84194	2.02284	0.544211	0.691716	0.323107	0.763253	2.04044	0.580572
PcyM_0040300	0.194657	0.750648	1.03661	0.165305	0.221888	0.134825	0.312079	0.660639	0.208524
PcyM_0040400	0.625885	1.49058	0.115636	0.185782	1.05476	0.0904346	0.156329	0.744034	0.371826
PcyM_0040500	3.4306	5.17151	1.59402	0.997905	0.695404	0.137352	0.665349	3.39871	0.624003
PcyM_0040600	5.14726	2.61864	3.1514	1.03605	2.18722	1.18857	1.32316	3.6391	1.43375
PcyM_0040700	0.706025	2.77467	0.405542	0.18152	1.32941	0.305019	0.0830176	1.29541	0.474743
PcyM_0040800	4.04377	9.11091	0.815295	1.74261	3.83124	1.00917	4.92437	4.65666	2.87685
PcyM_0040900	5.12567	5.43525	0.761002	4.4948	5.79311	1.14324	0.964346	3.77397	3.09887
PcyM_0041000	0.436961	0.798303	0.540289	0.308273	0.210456	0.0232156	0.53177	0.591851	0.268429
PcyM_0041100	1.03191	2.7977	2.16903	0.311922	0.429375	0.576204	0.876707	1.99955	0.548552
PcyM_0041200	0.917006	0.911874	0.759176	0.175452	0.835435	0.434326	0.167329	0.862685	0.403136
PcyM_0041300	0.165555	0.448682	0.0282776	0.050715	0.293614	0.14599	0.0518642	0.214171	0.135546
PcyM_0041400	0.5899	1.11141	0.138873	0.159283	0.115713	0.178596	0.0545768	0.613394	0.127042
PcyM_0041500	1.09083	1.06003	210.987	0.419965	0.591366	0.207343	0.135721	71.0459	0.338599
PcyM_0041600	0.267993	0.481378	0.191385	0.080242	0.192774	0.10345	0.165496	0.313585	0.135491
PcyM_0041700	2.2839	4.00353	0.347239	1.05424	1.42811	0.356779	0.284388	2.21155	0.780881
PcyM_0041800	0.797237	1.62842	0.836171	0.133642	0.365302	0.271151	0.0470982	1.08728	0.204298
PcyM_0041900	2.81563	4.95009	0.398649	1.12834	1.11409	0.636119	0.945573	2.72145	0.956029
PcyM_0042000	0.872594	1.21631	1.01842	0.261373	0.430637	0.388303	0.237845	1.03577	0.32954
PcyM_0042100	1.55478	1.75562	0.803324	0.513764	0.334074	0.246421	0.285764	1.37124	0.345006
PcyM_0042200	0.0624694	0.145003	0.237758	0.0210303	0.0503473	0.0122013	0.0153492	0.14841	0.024732
PcyM_0042300	0.114272	0.336439	0.0133258	0.0258328	0.115133	0.000845712	0.0103093	0.154679	0.0380303
PcyM_0042400	0.0472345	0.184451	0.0397317	0.0260221	0.093468	0.0435778	0.0142773	0.0904724	0.0443363
PcyM_0042500	1.06325	5.08145	0.51496	1.10257	1.93948	0.569992	0.928665	2.21989	1.13518
PcyM_0042600	0.852133	1.58457	0.898246	0.197071	0.581076	0.0319764	0.313081	1.11165	0.280801
PcyM_0042700	3.54019	5.02655	0.399425	1.4685	1.59127	0.314524	0.394061	2.98872	0.94209
PcyM_0042800	0.68459	1.28596	0.142798	0.255849	0.554252	0.163267	0.0966633	0.70445	0.267508
PcyM_0042900	0.0347121	0.0659402	0.00526794	0.012799	0.0298431	0.0062278	0.00308109	0.0353068	0.0129877
PcyM_0043000	0.339448	0.645355	0.19759	0.405486	0.383077	0.17555	0.180263	0.394131	0.286094
PcyM_0043100	0.202534	0.553739	0.0609548	0.136757	0.239119	0.0502481	0.0402176	0.272409	0.116585
PcyM_0043200	0.184614	0.256806	1.15841	0.0706374	0.119955	0.0327991	5.00887	0.533276	1.30807
PcyM_0043300	0.112142	0.357711	0.174047	0.0826739	0.0812438	0.0121767	0.0509959	0.214633	0.0567725
PcyM_0043400	0.256842	1.27082	0.220447	0.426312	0.124652	0.12015	0.0776952	0.582705	0.187202
PcyM_0043500	0.343904	1.04676	0.976928	0.588989	0.847241	0.201552	0.96633	0.789198	0.651028	PVX_078695, unspecified product
PcyM_0043600	0.30494	2.2095	0.0874103	0.141239	0.551077	0.00574251	0.312461	0.867284	0.25263
PcyM_0043700	0.0408389	0.168423	0.0343749	0.0297911	0.0985564	0.0395702	0.0148052	0.0812122	0.0456807
PcyM_0043800	0.0983366	0.277724	0.0165685	0.0324494	0.172605	0.0787443	0.0259554	0.130876	0.0774386
PcyM_0043900	0.714881	4.34814	1.18095	0.375043	1.28006	0.115021	0.508529	2.08132	0.569663
PcyM_0044000	1.43752	3.22173	2.58832	0.258013	0.438871	0.485156	0.827447	2.41586	0.502372
PcyM_0044100	0.133923	0.673728	0.156264	0.160052	0.125018	0.105435	0.124944	0.321305	0.128862
PcyM_0044200	0.165884	0.17204	0.377515	0.0398542	0.0603121	0.0477602	0.144267	0.23848	0.0730483
PcyM_0044300	0.825293	2.49993	2.34554	1.48514	1.23958	0.475095	2.30531	1.89026	1.37628	PVX_078695, unspecified product
PcyM_0044400	3.19607	0.418857	348.941	0.547502	0.121707	0.0642741	0.0339075	117.519	0.191848
PcyM_0044500	0.119628	0.343778	0.116047	0.0536264	0.0920183	0.0247168	1.36246	0.193151	0.383205
PcyM_0044600	1.09414	1.22632	0.412487	0.576649	1.26442	0.122195	0.571657	0.910983	0.63373
PcyM_0044700	0.0600803	0.099184	0.086115	0.0586183	0.0275434	0.0813429	0.426471	0.0817931	0.148494
PcyM_0044800	1.81599	3.50949	0.80752	0.75934	1.50739	1.94669	0.550737	2.04433	1.19104	PVX_148260, unspecified product
PcyM_0044900	0.455212	1.05004	0.353418	0.134669	0.28661	0.105367	0.190521	0.619557	0.179292
PcyM_0045000	0.578926	1.25752	0.119857	0.258696	0.441831	0.148377	0.0721036	0.652102	0.230252
PcyM_0045100	0.187273	0.789904	0.160994	0.194279	0.277357	0.0510823	0.168279	0.37939	0.172749
PcyM_0045200	3.99336	4.71143	0.755675	0.668499	0.697884	0.301968	0.417814	3.15349	0.521541
PcyM_0045300	0.41307	0.856825	0.301178	0.216274	0.279304	0.118734	0.29354	0.523691	0.226963
PcyM_0045400	2.71367	3.28039	1.63043	0.918761	2.00683	0.764027	0.960548	2.5415	1.16254
PcyM_0045500	2.46787	2.85534	4.034	0.412268	0.284364	0.289149	0.343135	3.11907	0.332229
PcyM_0045600	0.884473	1.2174	0.608223	0.267574	0.573105	0.379524	0.941715	0.903366	0.540479
PcyM_0045700	0.19002	1.61709	0.396342	0.270358	0.0715182	0.0388181	0.016694	0.734484	0.099347
PcyM_0045800	0.470031	0.526416	0.657761	0.348288	0.221595	0.0402388	0.578813	0.551403	0.297234
PcyM_0045900	4.02764	4.34977	0.841856	3.49652	4.48701	0.897902	0.745976	3.07309	2.40685
PcyM_0046000	3.46465	22.8004	8.14552	0.735237	1.68339	1.31096	2.91465	11.4702	1.66106
PcyM_0046100	1.00419	2.31641	0.358326	0.184354	0.199628	0.293028	0.168956	1.22631	0.211492
PcyM_0046200	1.55411	0.649403	0.119932	0.164857	0.306336	0.104075	0.0547054	0.774482	0.157493
PcyM_0046300	1.62693	3.7209	0.799749	0.264385	1.46976	0.256969	1.02055	2.04919	0.752915
PcyM_0046400	1.14519	1.40952	0.109919	0.474943	0.684458	0.128708	0.177578	0.888209	0.366422
PcyM_0046500	2.00336	3.8848	2.75439	0.765496	1.19142	0.641524	1.59006	2.88085	1.04713
PcyM_0046600	2.25603	2.54139	0.576462	1.18014	1.41307	1.8854	1.21569	1.79129	1.42358
PcyM_0046700	0.244845	0.927861	0.14335	0.0705695	0.171393	0.361871	0.853648	0.438685	0.36437
PcyM_0046800	1.97016	2.75948	2.55495	0.737049	0.488621	0.276372	0.630616	2.4282	0.533165
PcyM_0046900	0.0514411	0.353279	0.0233215	0.0235494	0.0503928	0.27823	0.0832164	0.14268	0.108847
PcyM_0047000	1.62319	9.51186	5.6047	1.62388	2.10552	0.261635	0.622633	5.57991	1.15342
PcyM_0047100	0.826304	0.667125	0.0926819	0.146655	0.177276	0.165222	0.0983994	0.528704	0.146888
PcyM_0047200	1.92404	3.52904	87.9437	0.427261	0.562696	0.401821	3.25438	31.1323	1.16154	PVX_097545, variable surface protein Vir12-related
PcyM_0047300	0.476155	0.637931	0.155937	0.100777	0.23251	0.0783879	0.0470012	0.423341	0.114669
PcyM_0047400	1.9355	2.81013	3.76607	0.334135	0.319336	0.46597	0.7662	2.83723	0.47141
PcyM_0047500	0.843257	1.0819	0.524702	0.218815	0.533863	0.334584	0.847233	0.816619	0.483624
PcyM_0047600	0.444055	0.88388	1.37927	0.171419	0.23325	0.00902857	0.166293	0.9024	0.144998
PcyM_0047700	3.19626	31.8179	6.13548	11.0882	11.59	0.699135	3.12859	13.7165	6.62648
PcyM_0047800	1.73489	3.35505	1.48173	0.475349	1.01288	0.450152	0.363694	2.19056	0.575518
PcyM_0047900	2.03623	2.25222	0.394351	0.67419	1.05256	0.179716	0.0228345	1.56093	0.482325
PcyM_0048000	4.73358	6.81914	1.01794	0.195822	1.91332	2.67304	0.866016	4.19022	1.41205
PcyM_0048100	1.70091	4.30669	0.687251	0.683325	0.197534	0.138917	0.139741	2.23162	0.289879
PcyM_0048200	0.665206	0.651776	0.0680453	0.094136	0.249797	0.0293404	0.0546192	0.461676	0.106973
PcyM_0048300	2.45117	3.29841	0.329675	7.5887	4.46392	0.430544	0.853995	2.02642	3.33429
PcyM_0048400	0.247149	0.661929	0.119899	0.104706	0.211113	0.148866	0.540346	0.342993	0.251258
PcyM_0048500	0.964779	2.75808	1.38637	0.307751	1.11429	0.861396	1.21037	1.70308	0.873451
PcyM_0048600	2.5568	25.6985	5.04115	8.96283	9.39531	0.552006	2.49949	11.0988	5.35241
PcyM_0048700	0.599581	1.08506	0.106378	0.263033	0.330793	0.119649	0.0682725	0.597007	0.195437
PcyM_0048800	0.48776	1.17689	0.813116	0.243145	0.230278	0.211658	0.218319	0.825923	0.22585
PcyM_0048900	0.985118	2.60157	0.676591	0.939919	0.54856	0.794891	22.7177	1.42109	6.25027
PcyM_0049000	0.191204	0.589448	0.217608	0.131367	0.196077	0.152451	0.101539	0.332753	0.145358
PcyM_0049100	2.24927	2.73202	0.469046	6.69019	3.89915	0.361161	0.803598	1.81678	2.93852	PVX_001610, variable surface protein Vir25-related
PcyM_0049200	0.284233	0.856306	0.521034	0.060056	0.141768	0.0845824	0.319914	0.553858	0.15158
PcyM_0049300	0.959273	2.4953	1.67081	0.293935	1.00955	0.822725	1.18304	1.70846	0.827312
PcyM_0049400	0.922583	1.61536	0.716741	0.479293	0.746055	0.222522	0.466324	1.08489	0.478548
PcyM_0049500	1.2069	2.04867	0.377305	0.272188	0.649741	0.353481	0.470999	1.21096	0.436602
PcyM_0049600	0.177123	0.379143	0.102333	0.184235	0.162698	0.071048	0.0687648	0.219533	0.121686
PcyM_0049700	0.85804	1.1109	0.319256	0.304552	0.487316	0.260041	0.407325	0.762731	0.364808
PcyM_0049800	0.053319	0.459253	0.0413596	0.538725	0.0138762	0.467352	0.0342459	0.184644	0.26355
PcyM_0049900	0.673022	1.69569	0.387405	0.345981	0.433893	0.327907	0.84244	0.918705	0.487556
PcyM_0050000	0.70771	0.962623	0.45677	0.192214	0.463565	0.293536	0.728918	0.709034	0.419558
PcyM_0050100	5.82662	4.13427	2.55638	0.771968	0.713742	0.639617	0.637446	4.17242	0.690693
PcyM_0050200	0.255244	0.252703	0.0801402	0.0604371	0.0498935	0.0215405	0.0601075	0.196029	0.0479947
PcyM_0050300	0.448426	0.8916	0.0400221	1.00107	0.137576	0.168398	0.0750612	0.460016	0.345526
PcyM_0050400	0.01076	0.864517	0.250566	0.0340396	0.0194237	0	0.00440972	0.375281	0.0144683
PcyM_0050500	5.32515	10.5042	2.028	2.16924	6.34879	1.06805	2.08124	5.95244	2.91683
PcyM_0050600	0.0724915	1.27823	0.12065	0.0501254	0.047208	0.0450182	0.610597	0.490457	0.188237
PcyM_0050700	0.0466886	0.0495867	0.00182444	0.0244952	0.0148619	0.0117155	0.00926543	0.0326999	0.0150845
PcyM_0050800	0.04998	0.195285	0.112503	0.0133056	0.0464815	0.00524966	0.0696122	0.119256	0.0336622
PcyM_0050900	0.0914742	0.166795	0.0201968	0.0209757	0.086283	0.0845322	0.305085	0.0928219	0.124219
PcyM_0051000	1.00044	0.870083	0.244028	0.191329	0.475182	0.631436	0.569722	0.704851	0.466917	PVX_097570, Phist protein (Pf-fam-b)
PcyM_0051100	0.0214158	0.0346188	0.00443486	0.0109656	0.0163705	0.00436293	0.0317111	0.0201565	0.0158525
PcyM_0051200	0.286856	0.521218	0.166537	0.256472	0.291621	0.122666	0.156072	0.32487	0.206708
PcyM_0051300	0.675828	0.897214	0.889772	0.53322	0.467085	0.18438	0.862355	0.820938	0.51176	PVX_078695, unspecified product
PcyM_0051400	0.0640998	0.305222	0.0915208	0.107652	0.0664436	0.0646548	0.0495313	0.153614	0.0720705
PcyM_0051500	2.59304	5.9217	4.79163	0.437745	0.849886	0.866879	1.42277	4.43545	0.894321
PcyM_0051600	0.406251	1.53517	0.287246	0.242387	0.32682	0.0577891	0.215892	0.742889	0.210722
PcyM_0051700	2.28202	3.35431	1.06187	0.468432	1.01969	0.589061	0.551849	2.23273	0.657258
PcyM_0051800	0.844936	1.53397	0.382786	0.287979	0.477596	0.291651	0.889695	0.920565	0.486731
PcyM_0051900	2.52542	8.29405	1.57586	0.82273	2.30895	0.618819	0.926575	4.13178	1.16927	PVX_066690, unspecified product
PcyM_0052000	0.618256	0.903357	0.276022	0.203586	0.207691	0.136319	0.290221	0.599212	0.209454
PcyM_0052100	0.836624	1.7545	0.511466	0.356708	0.46024	0.320092	0.956936	1.0342	0.523494
PcyM_0052200	1.301	2.98679	8.07169	1.06867	1.09832	1.47942	3.82181	4.11983	1.86705	PVX_086870, VIR protein, pseudogene
PcyM_0052300	0.991163	0.0977783	0.0633856	0.0246176	0.080474	0.0159016	0.0435022	0.384109	0.0411239
PcyM_0052400	0.339795	1.07609	0.472577	0.18594	0.26932	0.146747	0.197518	0.629486	0.199881
PcyM_0052500	7.95596	6.58572	2.61344	1.72917	3.67783	4.89227	5.0979	5.71837	3.84929
PcyM_0052600	0.774966	1.77122	0.334074	0.354049	0.414131	0.367109	0.992738	0.960086	0.532007
PcyM_0052700	0.314898	2.20913	1.66818	0.113171	0.700011	0.28235	0.262138	1.3974	0.339418
PcyM_0052800	0.470683	1.04783	0.249651	0.231937	0.252319	0.199458	0.0419722	0.589388	0.181421
PcyM_0052900	9.84944	20.1109	6.93547	4.34728	9.53697	2.60974	4.19888	12.2986	5.17322	PVX_078695, unspecified product
PcyM_0053000	8.1148	11.0987	4.40186	1.19822	3.20216	0.928088	2.91809	7.87178	2.06164
PcyM_0053100	7.68851	10.546	4.22959	1.20727	3.11584	0.880423	2.6537	7.48802	1.96431
PcyM_0053200	0.199409	0.258476	0.182954	0.201468	0.1076	0.267702	0.100144	0.213613	0.169229
PcyM_0053300	0.377014	0.959733	0.70245	0.561863	0.658585	0.175177	0.0621648	0.679732	0.364448
PcyM_0053400	4.02261	3.89245	2.13416	1.79968	2.89724	0.685093	0.637852	3.34974	1.50496
PcyM_0053500	2.23659	2.61844	0.245931	6.81061	3.99412	0.369423	1.09972	1.70032	3.06847	PVX_001610, variable surface protein Vir25-related
PcyM_0053600	0.0766371	0.25826	0.102811	0.146613	0.114466	0.0538094	0.0258996	0.145903	0.085197
PcyM_0053700	0.717851	1.24871	0.161982	0.164287	0.189884	0.203375	0.109541	0.709516	0.166772
PcyM_0053800	0.16645	0.642419	0.159315	0.0968424	0.229285	0.0441116	0.128498	0.322728	0.124684
PcyM_0053900	1.89164	2.24155	1.48991	0.806932	1.60182	0.252	0.521708	1.87437	0.795614
PcyM_0054000	1.87558	7.57126	0.863453	0.777189	2.09569	1.42068	1.84533	3.43676	1.53472	PVX_023685, unspecified product
PcyM_0054100	0.837781	2.83696	0.282976	0.132661	0.391624	0.419433	0.114378	1.31924	0.264524
PcyM_0054200	6.33972	7.96618	1.35756	1.67097	2.38877	1.43535	1.56154	5.22115	1.76416	PVX_069190, unspecified product
PcyM_0054300	2.88756	2.76882	0.755214	0.204392	0.477219	0.285917	0.407159	2.1372	0.343672
PcyM_0054400	0.17835	0.246356	0.10534	0.0444646	0.100789	0.0752818	0.199704	0.176682	0.10506
PcyM_0054500	0.397947	1.62616	0.80704	0.0834593	0.179092	0.0433746	0.120013	0.943714	0.106485
PcyM_0054600	1.22641	0.534684	0.216268	0.0406985	0.128261	0.170654	0	0.659119	0.0849035
PcyM_0054700	0.568647	1.49647	0.157902	0.173341	0.984857	0.12643	0.0921425	0.741007	0.344193
PcyM_0054800	33.9113	128.63	14.8597	10.7636	0.197869	14.5646	2.45039	59.1337	6.99414
PcyM_0054900	4.14159	1.87785	0.876335	0.483792	1.04396	0.412601	0.508	2.29859	0.612089
PcyM_0055000	0.206782	0.445414	0.149296	0.0508576	0.223969	0.14266	0.152682	0.267164	0.142542
PcyM_0055100	0.877424	10.6267	1.00032	0.385788	0.386242	0.183571	0.118935	4.16815	0.268634
PcyM_0055200	0.0499407	0.472962	0.102253	0.0736146	0.109732	0.112542	1.00354	0.208385	0.324856
PcyM_0055300	1.16659	2.93214	0.53721	0.452137	0.888907	0.474478	1.43789	1.54531	0.813354
PcyM_0055400	0.673789	1.18763	0.243217	0.16945	0.311522	0.0411269	0.0709335	0.701546	0.148258
PcyM_0055500	2.53918	2.81431	0.63019	0.917117	1.10646	13.6796	0.286161	1.99456	3.99733	PVX_106210, variable surface protein Vir6, putative
PcyM_0055600	2.78262	0.61591	0.124184	0.116757	0.0929849	0.0423109	0.477556	1.17424	0.182402
PcyM_0055700	0.169815	1.46239	0.123389	0.351431	0.283332	0.286357	0.234861	0.585198	0.288995
PcyM_0055800	2.30212	2.05453	0.315094	0.106012	0.179607	0.0290206	0.210974	1.55725	0.131403
PcyM_0055900	1.22101	3.18933	0.486449	0.56142	0.84627	0.283746	0.478248	1.63226	0.542421
PcyM_0056000	0.656075	0.547004	0.105115	0.208281	0.294799	0.166909	0.253847	0.436065	0.230959	PVX_014125, unspecified product
PcyM_0056100	0.650142	0.736749	0.156205	0.184945	0.802173	0.274174	0.221362	0.514365	0.370663
PcyM_0056200	0.82123	1.95902	0.54607	0.651069	0.828699	1.55044	0.677682	1.10877	0.926972
PcyM_0056300	0.301671	2.41337	0.670158	1.13807	0.961187	0.181629	0.218397	1.1284	0.624821
PcyM_0056400	1.12983	2.0898	4.01649	0.614479	1.08976	0.0674643	0.568478	2.41204	0.585045
PcyM_0056500	0.214226	0.617379	0.149391	0.0738632	0.158297	0.126922	0.215573	0.326999	0.143664
PcyM_0056600	0.0928207	1.08299	3.80092	1.27515	0.776761	3.35122	4.98013	1.65891	2.59581
PcyM_0056700	0.520326	2.30219	1.00243	0.321064	1.31646	0.935573	0.527011	1.27498	0.775028
PcyM_0056800	7.83963	7.71875	4.95792	5.20272	10.4055	2.76237	3.40332	6.83877	5.44347	PVX_112115, unspecified product
PcyM_0056900	2.20082	3.85235	0.371455	0.984468	1.12678	0.349082	0.240076	2.14154	0.675102
PcyM_0057000	3.65733	10.6522	7.75402	3.57847	4.86769	1.56333	7.32557	7.3545	4.33376
PcyM_0057100	1.06294	2.90418	0.277445	0.370935	1.83748	0.221697	0.121341	1.41485	0.637863
PcyM_0057200	0.051759	0.3734	5.30654	0.0266265	0.137199	0	0.0217972	1.91057	0.0464056
PcyM_0057300	0.175439	1.04345	0.209545	0.51174	1.02897	0.013867	0.286616	0.476144	0.460298
PcyM_0057400	0.819829	0.551616	0.0531979	0.555786	1.38482	0.291974	0.0256754	0.474881	0.564563	PVX_107755, unspecified product
PcyM_0057500	0.461045	0.971639	0.0997595	0.229757	0.362217	0.117058	0.0428409	0.510814	0.187968
PcyM_0057600	2.72001	4.81008	1.24857	1.25885	1.95935	0.776375	0.779382	2.92622	1.19349
PcyM_0057700	0.0505949	0.272894	0.25051	0.0787773	0.0705953	0.0361642	0.717232	0.191333	0.225692
PcyM_0057800	1.07899	2.90157	0.358142	0.358977	1.90193	0.242347	0.144826	1.44624	0.66202
PcyM_0057900	0.0483093	0.301415	0.0577311	0.315161	0.067477	0.0320333	0.0511933	0.135818	0.116466
PcyM_0058000	2.43787	5.54383	1.33886	0.366132	0.704598	0.289632	0.141245	3.10685	0.375402
PcyM_0058100	0.0624335	0.178541	0.142821	0.0538653	0.0340355	0.00804897	0.0314297	0.127932	0.0318449
PcyM_0058200	0.341353	1.72964	1.99504	0.224164	0.870869	0.623964	0.336965	1.35534	0.51399
PcyM_0058300	4.56128	4.41891	0.907126	0.858199	0.837805	0.953007	0.353328	3.29577	0.750585	PVX_096937, VIR protein, pseudogene
PcyM_0058400	3.0948	7.48136	1.48872	1.08802	2.49044	0.832053	2.56508	4.02163	1.7439
PcyM_0058500	0.341753	0.972201	1.65538	0.0943033	0.13675	0.0624963	0.0975095	0.989778	0.0977648
PcyM_0058600	2.35092	3.74293	1.82415	0.37546	1.69009	1.38533	1.26806	2.63933	1.17974
PcyM_0058700	2.59785	2.76385	0.94465	0.283951	0.72774	0.290202	0.300387	2.10211	0.40057
PcyM_0058800	4.09867	6.58152	1.40957	1.20354	2.18958	1.21904	1.25559	4.02992	1.46694	PVX_004520, variable surface protein Vir4, putative; PVX_096000, variable surface protein Vir4, putative
PcyM_0058900	0.179113	0.998787	1.1301	1.00838	0.582743	0.0912216	1.14847	0.769334	0.707704
PcyM_0059000	1.14047	1.55195	0.26237	0.231568	0.547865	0.523383	0.425719	0.984928	0.432134
PcyM_0059100	1.20519	1.04863	0.639819	0.198454	0.637866	0.306469	0.495294	0.964545	0.409521
PcyM_0059200	0.760014	1.15401	0.306238	0.23514	0.292545	0.162698	0.30519	0.740089	0.248894
PcyM_0059300	0.442507	1.55598	0.123364	0.16203	0.512801	0.277949	0.246789	0.707282	0.299892
PcyM_0059400	1.34282	0.18459	0.225441	0.0283747	0.111908	0.183757	0.0632528	0.584284	0.0968232
PcyM_0059500	9.23514	29.6759	4.53282	3.18734	12.2148	9.86744	11.9223	14.4813	9.29797
PcyM_0059600	0.0711646	0.04101	0.00966604	0.0101861	0.0287687	0.0065243	0.0149383	0.0406136	0.0151043
PcyM_0059700	0.088028	0.296893	0.122622	0.0976682	0.243476	0.0370429	0.101362	0.169181	0.119887
PcyM_0059800	2.75519	2.33843	0.0286765	0.925764	1.96122	1.7382	0.219278	1.70743	1.21112
PcyM_0059900	2.52404	3.1691	0.27168	7.53506	4.45654	0.387151	0.881486	1.98827	3.31506	PVX_001610, variable surface protein Vir25-related
PcyM_0060000	0.39656	0.713411	0.0786109	0.202568	0.293503	0.070454	0.0664887	0.396194	0.158254
PcyM_0060100	0.389985	1.16406	0.624208	0.17389	0.109899	0.264178	0.347923	0.726084	0.223972
PcyM_0060200	0.0838139	0.0662504	0.0333947	0.070189	0.0831902	0.270524	0.108529	0.061153	0.133108
PcyM_0060300	0.892645	1.21497	0.556563	0.186818	0.260907	0.859195	0.641926	0.888059	0.487212
PcyM_0060400	0.173758	0.821148	0.712962	0.520796	0.49195	0.262998	0.719958	0.569289	0.498926
PcyM_0060500	3.33452	7.21837	0.737234	1.39097	2.82158	0.430695	0.500808	3.76338	1.28601
PcyM_0060600	0.0187752	0.0461016	0.0431832	0.037303	0.0689564	0.155395	0.0402783	0.03602	0.0754832
PcyM_0060700	1.71977	1.73416	0.704276	0.330953	0.848868	0.659821	0.673076	1.38607	0.628179
PcyM_0060800	0.11569	0.3702	0.134259	0.0883983	0.146495	0.0401084	0.143528	0.206717	0.104633
PcyM_0060900	1.02801	0.83434	0.00780122	0.347987	0.733923	0.65591	0.0617998	0.623384	0.449905
PcyM_0061000	0.747211	0.6842	0.0951138	0.243546	0.343059	0.177313	0.344775	0.508842	0.277173
PcyM_0061100	1.63298	1.17502	0.95886	0.255913	0.865084	0.407641	0.704926	1.25562	0.558391
PcyM_0061200	0.334947	1.33033	0.238773	0.142809	0.249025	0.0307679	0.131064	0.634685	0.138417
PcyM_0061300	2.50912	1.58909	0.471118	0.360552	0.384783	0.198829	1.22951	1.52311	0.543418
PcyM_0061400	3.21477	31.1224	5.87783	10.8954	11.3951	2.11413	2.88337	13.405	6.82202
PcyM_0061500	0.923179	1.86849	1.00046	0.18621	0.614261	0.140132	0.300364	1.26405	0.310242
PcyM_0061600	0.568661	0.935148	0.13755	0.122064	0.319759	0.328426	0.087877	0.54712	0.214532
PcyM_0061700	1.12831	0.837628	0.754732	0.119625	0.20314	0.0213608	0.124757	0.906891	0.117221
PcyM_0061800	1.15654	0.825261	0.772801	0.145409	0.217164	0.0218721	0.127744	0.918201	0.128047
PcyM_0061900	0.479428	1.03621	0.712137	0.218102	0.567501	0.221958	0.745207	0.742593	0.438192
PcyM_0062000	0.449213	0.662527	0.274958	0.12612	0.2774	0.405681	0.464987	0.462233	0.318547	PVX_053190, unspecified product
PcyM_0062100	1.5425	3.238	0.62886	0.494447	1.06628	0.607329	0.819671	1.80312	0.746932
PcyM_0062200	0.143875	0.540122	0.108845	0.115269	0.184827	0.033669	0.0980787	0.264281	0.107961
PcyM_0062300	1.77775	3.20457	2.14566	0.527946	2.85483	0.322519	0.594136	2.37599	1.07486
PcyM_0062400	0.708257	1.6151	0.298724	0.184218	0.471971	0.277145	0.39236	0.874027	0.331423
PcyM_0062500	2.22475	5.27382	0.453324	0.980959	1.41727	0.386504	1.13638	2.65063	0.980279
PcyM_0062600	4.21997	9.01369	1.03276	1.04437	1.77017	1.12615	0.909608	4.75547	1.21257
PcyM_0062700	1.28059	4.4612	0.40768	1.37622	0.830254	0.769999	37.3932	2.04982	10.0924	PVX_112720, unspecified product
PcyM_0062800	0.583241	0.873192	0.143312	0.205477	0.31841	0.112102	0.118927	0.533248	0.188729
PcyM_0062900	44.9627	115.66	53.1956	9.62562	62.9927	0.301774	0.0436288	71.2726	18.2409	PVX_241290, unspecified product
PcyM_0063000	0.666867	0.880465	0.831796	0.514836	0.425387	0.167783	0.814733	0.793043	0.480685	PVX_078695, unspecified product
PcyM_0063100	0.508262	0.572948	0.132592	0.222572	0.339689	0.211784	0.141083	0.4046	0.228782	PVX_053190, unspecified product
PcyM_0063200	2.22597	3.45527	0.963894	0.569924	0.942505	1.17821	0.429449	2.21504	0.780021
PcyM_0063300	8.82494	7.45181	9.9929	0.396018	1.19568	1.07891	7.19877	8.75655	2.46734
PcyM_0063400	1.29174	3.12192	1.6767	0.585079	0.826989	0.287892	0.881455	2.03012	0.645354
PcyM_0063500	11.9129	4.78695	43.5385	0.290394	0.560828	0.638834	0.222809	20.0794	0.428217
PcyM_0063600	2.04082	2.98326	4.47715	0.472877	0.474765	0.236192	0.490975	3.16708	0.418702
PcyM_0063700	1.55002	1.35979	0.379102	0.422887	0.475849	0.0894836	0.14233	1.0963	0.282637
PcyM_0063800	1.41901	2.59941	0.64293	0.700283	0.446609	0.0856543	0.571659	1.55378	0.451052
PcyM_0063900	0.177175	0.411274	1.60326	0.452179	0.952181	0.0124039	0.252881	0.73057	0.417411
PcyM_0064000	8.36458	10.6069	4.96518	1.58269	3.63561	0.956176	1.03302	7.9789	1.80187	PVX_066690, unspecified product
PcyM_0064100	0	0.325295	0.0210008	0.0837358	0.196508	0	2.30713	0.115432	0.646843
PcyM_0064200	1.97425	1.86374	1.21633	1.32658	1.77037	0.275853	0.35617	1.68477	0.932244
PcyM_0064300	0.247241	0.637811	0.161153	0.0677997	0.21938	0.128701	0.147815	0.348735	0.140924
PcyM_0064400	0.960426	2.98818	2.79145	1.68965	1.47239	0.579629	2.77027	2.24668	1.62799	PVX_078695, unspecified product
PcyM_0064500	2.20276	4.80244	4.01526	0.399137	0.706893	0.730246	1.22042	3.67349	0.764175
PcyM_0064600	2.646	4.19582	0.302627	2.19682	2.66084	0.522973	0.275364	2.38148	1.414
PcyM_0064700	0.133317	0.159885	0.0137205	0.0295891	0.037368	0.0357433	0.0298449	0.102307	0.0331363
PcyM_0064800	0.0603664	0.33823	0.120942	0.110732	0.0964728	0.0264062	0.0454373	0.173179	0.0697621
PcyM_0064900	2.12306	5.23011	0.534192	0.779395	1.75698	0.57794	0.941428	2.62912	1.01394
PcyM_0065000	0.646144	1.082	0.36955	0.309846	0.526827	0.27282	0.150855	0.699233	0.315087
PcyM_0065100	0.688162	1.53097	11.5915	0.182966	0.470476	0.257853	0.355307	4.60355	0.31665	PVX_026190, unspecified product
PcyM_0065200	0.906171	1.56811	0.123079	0.112314	0.127106	0.177943	0.19522	0.865787	0.153146
PcyM_0065300	0.390168	0.657625	0.188002	0.639737	1.32651	0.0164838	0.312427	0.411932	0.573789
PcyM_0065400	0.596859	1.28058	0.364307	0.22534	1.20212	0	0.122417	0.747248	0.387469
PcyM_0065500	5.05885	9.03546	4.07075	0.0623427	1.06123	0.693701	1.15694	6.05502	0.743555
PcyM_0065600	4.04612	3.16694	0.247355	0.448478	1.29016	0.983751	0.2473	2.4868	0.742422
PcyM_0065700	1.9068	1.16693	1.00314	0.858496	0.888626	0.851436	0.935886	1.35896	0.883611
PcyM_0065800	0.50937	4.03842	0.0532795	1.288	1.47524	2.13739	0.994418	1.53369	1.47376
PcyM_0065900	0	0.43871	0.427667	0.0477303	0.138693	0.0209986	0.0351038	0.288792	0.0606315
PcyM_0066000	0.724735	1.02832	0.426654	0.132154	0.183509	0.235764	0.342579	0.726569	0.223501
PcyM_0066100	0.0521148	0.137589	0.109536	0.0447723	0.0564933	0	0.0361753	0.0997466	0.0343602
PcyM_0066200	0.488206	1.16303	0.663024	0.0627507	0.132518	0.00948609	0.0441629	0.771421	0.0622295
PcyM_0066300	0.829866	1.45033	0.404515	0.279939	0.320994	0.182852	0.411456	0.894905	0.29881
PcyM_0066400	0.641625	0.998704	2.18704	0.196069	0.46352	0.102398	0.073409	1.27579	0.208849
PcyM_0066500	0.863782	0.57912	2.32709	0.235278	0.385532	0.0800987	0.156252	1.25666	0.21429
PcyM_0066600	0.843108	2.61157	2.49797	1.51881	1.37154	0.525178	2.50285	1.98421	1.4796	PVX_078695, unspecified product
PcyM_0066700	0.941793	1.34205	0.62031	0.236325	0.488779	0.354215	0.858033	0.96805	0.484338
PcyM_0066800	1.41635	2.98441	2.54415	0.247229	0.443764	0.470672	0.784085	2.31497	0.486438
PcyM_0066900	0.723149	2.59311	0.675505	0.603529	0.926786	0.981693	0.747764	1.33059	0.814943
PcyM_0067000	0.465309	1.35895	0.111606	0.16632	0.89988	0.0758057	0.118508	0.64529	0.315128
PcyM_0067100	0.0651186	0.191819	0.149209	0.0444259	0.0460276	0.414102	0.027545	0.135382	0.133025
PcyM_0067200	1.32108	4.23473	0.229287	0.695333	1.04835	0.076115	0.325745	1.92837	0.536385
PcyM_0067300	0.252786	0.633552	0.219792	0.109	0.245998	0.141175	0.166832	0.36871	0.165751
PcyM_0067400	2.47492	4.5637	0.760713	0.981925	1.29527	0.360182	0.350566	2.59978	0.746985
PcyM_0067500	0.0153503	0.476043	1.15265	0.0999445	0.0622787	0.00786729	0.0871647	0.548014	0.0643138
PcyM_0067600	0.423804	1.67317	0.603658	0.150005	0.250319	0.252016	0.393782	0.900212	0.26153
PcyM_0067700	0.513679	1.26108	0.120595	0.161816	0.835363	0.0832167	0.12597	0.631784	0.301592
PcyM_0067800	0.429549	3.55234	0.464366	0.253058	1.04317	0.495133	0.456717	1.48209	0.56202
PcyM_0067900	1.354	0.136389	0.144861	0.0205355	0.0782698	0.0404074	0.0424595	0.545084	0.045418
PcyM_0068000	10.8673	35.0926	5.84069	3.79179	14.286	12.3995	14.0139	17.2669	11.1228
PcyM_0068100	0.19546	0.407947	0.0530962	0.23831	0.15303	0.175025	0.0886742	0.218834	0.16376	PVX_060690, unspecified product
PcyM_0068200	0.105534	0.206247	0.0820748	0.0737114	0.193951	0.081831	0.100622	0.131285	0.112529
PcyM_0068300	0.124814	0.469181	0.127886	0.0897269	0.255902	0.0392693	0.130546	0.240627	0.128861
PcyM_0068400	0.413934	0.810977	0.903714	0.199971	0.75964	0.148174	0.0223824	0.709542	0.282542
PcyM_0068500	0.3327	0.104019	0.0360638	0.113108	0.219462	0.0508128	0.0182627	0.157594	0.100411
PcyM_0068600	1.91663	2.15365	0.564824	0.366511	0.72765	0.311356	0.193192	1.54504	0.399677
PcyM_0068700	1.29681	2.08726	0.652913	0.334868	0.665013	0.58488	0.551753	1.34566	0.534128
PcyM_0068800	0.795633	0.906014	0.263753	0.342751	0.804914	0.00583607	0.281366	0.655134	0.358717
PcyM_0068900	0.697074	1.66636	0.352298	1.04463	1.5991	0.162773	3.8809	0.905243	1.67185	PVX_001610, variable surface protein Vir25-related
PcyM_0069000	3.25332	2.64698	0.162105	0.903458	1.35517	0.145568	0.318316	2.0208	0.680628
PcyM_0069100	0.709973	1.43928	0.0394046	0.177753	0.478013	0.146236	0.180947	0.729552	0.245737
PcyM_0069200	2.76315	11.7254	3.91234	1.23694	1.50976	0.746319	2.38128	6.13363	1.46857
PcyM_0069300	21.2195	52.5502	46.076	1.76684	4.74612	2.29668	4.52453	39.9486	3.33354	PVX_110295, variable surface protein Vir22-like; PVX_115490, VIR protein
PcyM_0069400	0.241877	1.00933	0.242239	0.11641	0.256757	0.272793	0.114796	0.497817	0.190189
PcyM_0069500	1.88971	2.13496	6.30304	0.448769	1.34575	0.158006	0.801595	3.44257	0.688529
PcyM_0069600	0.29705	1.92106	1.22818	0.101763	0.556651	0.130013	0.220445	1.14876	0.252218
PcyM_0069700	1.62508	1.46712	0.447153	0.232734	0.327401	0.0859431	0.247426	1.17979	0.223376
PcyM_0069800	0.0374378	0.157253	0.0232046	0.0139733	0.0171545	0.00818919	0.0154233	0.072632	0.0136851
PcyM_0069900	1.95146	4.45368	1.47486	0.731384	1.63743	0.362645	0.531833	2.62667	0.815823
PcyM_0070000	1.74717	3.28814	0.550553	0.716056	2.32959	0.355929	0.353813	1.86195	0.938847
PcyM_0070100	0.266739	0.648942	0.180979	0.147224	0.245461	0.0659326	0.140207	0.365553	0.149706
PcyM_0070200	0.729133	1.84314	0.420695	0.354295	0.451347	0.302273	0.926293	0.997655	0.508552
PcyM_0070300	0.868975	2.82488	0.367932	0.52332	1.24774	0.10744	0.65522	1.35393	0.633429
PcyM_0070400	0.34863	1.17519	0.787365	0.780555	0.742806	0.0964502	0.69	0.770396	0.577453
PcyM_0070500	0	0.335488	0.0975801	0.0791358	0.0568836	0	0.258496	0.144356	0.0986287
PcyM_0070600	0.13667	0.812538	0.106242	0.0487873	0.119862	0.078316	0.182445	0.351816	0.107353
PcyM_0070700	1.90105	3.51637	0.539157	0.848176	1.06763	0.325852	0.237028	1.98553	0.619672
PcyM_0070800	0.0311032	0.789619	0.125488	0.121953	0.0997876	0.124401	1.71974	0.315403	0.516471
PcyM_0070900	0.155896	0.530304	0.103444	0.0832361	0.164971	0.0426738	0.0843533	0.263215	0.0938085
PcyM_0071000	0.289955	0.623243	0.093052	0.126865	0.233169	0.0517215	0.0369219	0.335417	0.112169
PcyM_0071100	0.345645	1.11782	1.99388	0.63877	0.4668	0.85805	0.557894	1.15245	0.630379
PcyM_0071200	0.862377	0.788021	0.210759	0.256943	0.0234248	0	0.0109025	0.620385	0.0728175
PcyM_0071300	2.31991	2.87628	0.329549	7.23371	4.324	0.368508	0.838037	1.84191	3.19106	PVX_001610, variable surface protein Vir25-related
PcyM_0071400	0.119228	1.41134	0.293626	1.47329	0.26526	0.148332	0.231475	0.608065	0.529589
PcyM_0071500	0.285053	0.675899	0.237926	0.0716758	0.172013	0.0426156	1.07463	0.399626	0.340234
PcyM_0071600	0.353756	0.523719	0.223712	0.123131	0.126929	0.0846284	0.162931	0.367062	0.124405
PcyM_0071700	0.458602	1.31571	0.203175	0.170641	0.335905	0.0397928	0.174123	0.659162	0.180115
PcyM_0071800	0.656701	1.7787	0.241702	0.241079	1.17464	1.56136	1.9662	0.892367	1.23582
PcyM_0071900	5.33576	3.73165	1.96388	1.28197	2.67953	0.860805	0.649585	3.6771	1.36797
PcyM_0072000	0.112253	0.66722	0.941149	0.222541	0.188813	0.0389131	0.221049	0.573541	0.167829
PcyM_0072100	1.33677	6.46062	0.124306	0.401405	1.29061	0.0587031	0.483277	2.64057	0.5585
PcyM_0072200	0.350113	0.967772	0.412159	1.10756	0.1506	0.486166	0.111942	0.576681	0.464066	PVX_090290, variable surface protein Vir12, putative
PcyM_0072300	1.24961	4.96219	1.17787	1.06019	1.15367	0.523122	1.5326	2.46322	1.0674
PcyM_0072400	0.570262	1.04369	0.362521	0.16267	0.403384	0.227686	0.334403	0.658823	0.282036
PcyM_0072500	0.283526	1.95714	1.5224	0.362373	0.90659	0.0897263	0.985904	1.25436	0.586148
PcyM_0072600	0.140754	0.451446	0.145759	0.0583174	0.208989	0.032724	0.248175	0.245986	0.137051
PcyM_0072700	0.354289	2.23439	0.438662	0.287239	0.330115	0.0177262	0.208446	1.00911	0.210882
PcyM_0072800	1.1953	1.09518	0.461286	0.867406	0.445443	0.36743	0.132344	0.917258	0.453156
PcyM_0072900	0.656653	1.26278	0.571405	0.374728	0.600215	0.193899	0.376896	0.83028	0.386434
PcyM_0073000	0.847165	1.63883	0.895229	0.255939	1.21841	0.363229	0.159583	1.12708	0.499289
PcyM_0073100	3.26842	32.4284	6.1296	11.4057	11.8692	0.696095	3.2676	13.9421	6.80965
PcyM_0073200	2.40017	3.18553	0.302965	7.45263	4.35659	0.399877	0.956244	1.96289	3.29133	PVX_001610, variable surface protein Vir25-related
PcyM_0073300	2.04669	1.31474	0.195493	0.413667	1.35622	0.365613	0.298921	1.18564	0.608605
PcyM_0073400	0.960326	1.85679	1.00193	0.208366	0.694069	0.062773	0.395855	1.27301	0.340266
PcyM_0073500	2.50324	4.21667	1.24495	1.24885	1.96018	0.745554	0.773462	2.65495	1.18201
PcyM_0073600	1.68035	3.59788	0.755498	0.65945	1.4817	0.458497	0.504739	2.01124	0.776097
PcyM_0073700	5.9824	2.9787	3.21367	1.20488	4.04627	0.938917	1.49046	4.05826	1.92013
PcyM_0073800	0.536217	0.68073	0.0407501	0.112274	0.280961	0.102141	0.118071	0.419232	0.153362
PcyM_0073900	0.92856	0.915276	1.13087	0.263307	1.00133	0.164382	0.498603	0.99157	0.481905
PcyM_0074000	2.97729	5.61422	31.0331	3.9304	5.24402	1.69797	41.6615	13.2082	13.1335
PcyM_0074100	0.166045	0.863814	0.509987	0.153819	0.24629	0.0718321	0.178954	0.513282	0.162724
PcyM_0074200	0.341133	0.486042	0.22195	0.317624	0.343508	0.14899	0.166505	0.349708	0.244157
PcyM_0074300	2.44764	3.52075	0.374625	7.5865	4.46182	0.388797	0.859482	2.11434	3.32415
PcyM_0074400	0.0336892	0.430382	1.2186	0.0849515	0.346247	0.0937073	0.030467	0.56089	0.138843
PcyM_0074500	1.02887	2.04993	0.178299	0.42928	0.689959	0.161089	0.0589974	1.0857	0.334831
PcyM_0074600	0.555531	0.966037	0.536869	0.182546	0.373687	0.0199634	0.382182	0.686146	0.239594
PcyM_0074700	0.208355	0.424913	0.448096	0.169729	0.177598	0.0103022	0.0750706	0.360455	0.108175
PcyM_0074800	1.58715	2.42707	0.762404	0.473394	0.683427	0.213817	1.38518	1.59221	0.688955
PcyM_0074900	6.68513	5.94	0.251905	2.63139	3.07824	0.740106	1.18254	4.29235	1.90807
PcyM_0075000	0.437709	9.63358	0.0815514	0.751043	0.441346	0.144059	0.128398	3.38428	0.366212
PcyM_0075100	0.18055	0.638937	0.135982	0.112764	0.240418	0.0591991	0.150902	0.31849	0.140821
PcyM_0075200	0.315306	1.37729	0.326831	0.13476	0.328352	0.225298	0.0835409	0.673141	0.192988
PcyM_0075300	0.22052	0.273484	0.13657	0.0491517	0.13644	0.082429	0.21761	0.210191	0.121408
PcyM_0075400	0.414077	1.52351	1.32918	0.111799	0.13287	0.0388033	0.13571	1.08892	0.104796
PcyM_0075500	1.79401	1.23489	2.86746	0.832892	0.943695	0.791742	1.00416	1.96545	0.893123
PcyM_0075600	2.19453	4.91914	1.30534	1.99134	1.51853	1.294	1.39226	2.80633	1.54903	PVX_086870, VIR protein, pseudogene
PcyM_0075700	0.0283085	0.755924	0.21523	0.110054	0.0514135	0	0.116694	0.333154	0.0695405
PcyM_0075800	0	0.442066	0.0851348	0.0656839	0.123731	0.0233606	0.0738005	0.175734	0.071644
PcyM_0075900	1.72229	3.86443	0.728192	0.462393	1.21057	0.656934	0.883669	2.10497	0.803391
PcyM_0076000	0.921167	0.879012	1.10152	0.243628	0.403836	0.699464	4.54098	0.967234	1.47198
PcyM_0076100	0.419933	0.656055	0.272425	0.357732	0.251935	0.175339	0.892858	0.449471	0.419466
PcyM_0076200	0.130169	0.219507	0.102611	0.162637	0.107024	0.0497583	0.0239498	0.150762	0.0858423
PcyM_0076300	0.854783	0.142441	0.0142515	0.0362714	0.0673748	0.0724734	0.0627061	0.337159	0.0597064
PcyM_0076400	0.279791	0.723629	0.529445	0.070531	0.379252	0.147799	0.0499748	0.510955	0.161889
PcyM_0076500	0.464666	0.0514356	0.025651	0.0114825	0.039637	0.00774137	0.0166696	0.180584	0.0188826
PcyM_0076600	0.382621	1.19215	0.372006	0.182055	0.228705	0.153311	0.164355	0.648925	0.182106
PcyM_0076700	0.879496	2.57309	2.98221	0.146567	0.129173	0.675695	0.110517	2.14493	0.265488
PcyM_0076800	0.153637	0.798975	0.640163	0.0866773	0.168182	0.011623	0.0323764	0.530925	0.0747147
PcyM_0076900	0.605264	2.79533	0.141338	0.299432	0.372202	0.0900323	0.237271	1.18064	0.249735
PcyM_0077000	0.499802	1.29746	0.818071	0.281033	0.289086	0.349119	0.267941	0.871779	0.296795
PcyM_0077100	39.1978	0.372242	0.124142	0.192864	0.180039	0.055155	0.0877935	13.2314	0.128963
PcyM_0077200	6.19264	6.51541	5.19346	0.626069	0.34596	0.0894966	1.11422	5.96717	0.543936
PcyM_0077300	0.545928	1.59498	1.5344	0.923775	0.838671	0.3289	1.55608	1.2251	0.911856	PVX_078695, unspecified product
PcyM_0077400	1.09862	3.39401	3.19015	1.95235	1.67071	0.649567	3.15422	2.56093	1.85671	PVX_086875, variable surface protein Vir27-related
PcyM_0077500	4.84338	9.21926	0.439066	1.99029	5.0082	2.84719	1.34211	4.8339	2.79695	PVX_086870, VIR protein, pseudogene
PcyM_0077600	0.0227148	1.54888	0.184662	0.0965074	0.0952299	0.0177389	0.134793	0.585418	0.0860674
PcyM_0077700	0.0887947	0.715044	0.401956	0.309893	0.223571	0.459408	0.467777	0.401932	0.365162
PcyM_0077800	2.08494	1.2841	1.75346	0.502481	1.43107	0.350182	1.14968	1.7075	0.858354
PcyM_0077900	0.737917	0.69493	0.24412	0.261334	0.330237	0.184116	0.299552	0.558989	0.26881
PcyM_0078000	11.2736	17.7749	1.1136	3.31079	10.2414	2.12795	3.47948	10.054	4.78991	PVX_096937, VIR protein, pseudogene
PcyM_0078100	0.481628	1.91361	1.36026	0.321902	0.516037	0.130249	0.101635	1.25183	0.267455
PcyM_0078200	0.732983	1.08518	0.266273	0.160679	0.434279	0.436915	0.141075	0.694812	0.293237
PcyM_0078300	0	0.622568	1.80144	0.0828421	0.153288	0.0366055	0.0338527	0.808003	0.0766472
PcyM_0078400	0.855643	1.508	0.438411	0.39879	0.639914	0.247194	0.269362	0.934017	0.388815
PcyM_0078500	2.46106	2.91361	0.359961	7.18029	4.25742	0.384422	0.82846	1.91154	3.16265	PVX_001610, variable surface protein Vir25-related
PcyM_0078600	1.84621	2.50024	0.173776	0.882422	1.89917	0.130739	0.350086	1.50674	0.815603
PcyM_0078700	0.0329318	0.0626457	2.33638	0.0124445	0.0332624	0.0596714	0.0165909	0.810652	0.0304923
PcyM_0078800	0.0591042	0.0647101	0.0352644	0.0265837	0.0142149	0.0352043	0.0163274	0.0530262	0.0230826
PcyM_0078900	6.25982	4.58154	0.914808	0.600079	1.20746	0.56559	1.17463	3.91872	0.886938
PcyM_0079000	59.2162	589.223	935.043	282.69	279.506	145.785	640.382	527.828	337.091
PcyM_0079100	3.29605	2.1306	1.34817	1.65219	2.58223	2.02915	2.01798	2.25827	2.07039	PVX_112720, unspecified product
PcyM_0079200	24.9723	0.829077	1.49061	0.295754	0.365901	0.0666421	0.198644	9.09732	0.231735
PcyM_0079300	1.04122	2.7478	0.0296728	0.232509	0.147859	0.344585	0.39841	1.2729	0.280841
PcyM_0079400	1.02395	1.11898	0.0745586	0.25999	0.575463	0.0581778	1.74134	0.739163	0.658743
PcyM_0079500	0.679126	0.856201	0.198455	0.367835	0.408165	0.147615	0.188709	0.577928	0.278081
PcyM_0079600	0.505133	1.8479	0.257584	0.347821	0.50148	0.138841	1.46748	0.870207	0.613906
PcyM_0079700	3.54354	2.34935	0.616576	0.438107	0.437229	0.195014	0.325953	2.16982	0.349076
PcyM_0079800	0.450807	0.797282	0.741865	0.217332	0.184558	0.172539	0.222434	0.663318	0.199216
PcyM_0079900	0.163477	0.251231	0.094709	0.0405238	0.0820276	0.0321723	0.0122252	0.169806	0.0417372	PVX_086865, VIR protein
PcyM_0080000	0.0895255	0.173122	0.0668506	0.0256752	0.0674341	0.0345584	0.108344	0.109833	0.059003
PcyM_0080100	0.323502	0.719771	0.0724009	0.148847	0.297476	0.0447094	0.109626	0.371891	0.150165
PcyM_0080200	0.272937	0.249591	0.0570101	0.0513237	0.0607805	0.297387	0.0442026	0.193179	0.113423
PcyM_0080300	0.565978	0.600887	0.155633	0.277177	0.604108	0.0287076	0.246993	0.440833	0.289246
PcyM_0080400	1.36945	2.97035	2.88162	0.427476	2.27614	0.0353522	6.15962	2.40714	2.22465
PcyM_0080500	0.547822	0.523882	1.03743	0.362389	0.162893	0.153937	0.117025	0.703044	0.199061
PcyM_0080600	0.0542203	0.0925901	0.0339224	0.0137095	0.036833	0.0195452	0.0590773	0.0602443	0.0322913
PcyM_0080700	0.269737	0.251032	0.140134	0.117599	0.17214	0.128901	0.0295312	0.220301	0.112043	PVX_086865, VIR protein
PcyM_0080800	2.27346	2.07637	0.398545	0.34967	1.16515	0.318523	0.435446	1.58279	0.567197
PcyM_0080900	0.63146	1.57574	0.944469	0.147923	0.156798	0	0.021598	1.05056	0.0815798
PcyM_0081000	0.529068	0.885804	0.0840552	0.243166	0.470224	0.115522	0.0491618	0.499643	0.219518
PcyM_0081100	6.75974	8.63805	4.03624	1.29943	2.98701	0.755156	0.834429	6.47801	1.46901	PVX_066690, unspecified product
PcyM_0081200	2.47317	10.3005	2.28111	0.304557	0.980668	1.37917	3.22161	5.01825	1.4715	PVX_003490, VIR protein
PcyM_0100100	4.12784	8.47352	1.38225	1.436	2.94304	0.683331	1.84803	4.6612	1.7276
PcyM_0100200	0.0453439	0.0544131	0.00437451	0.0106852	0.0347483	0.0113097	0.00905726	0.0347105	0.0164501
PcyM_0100300	0.0649482	0.126365	0.0355969	0.034317	0.0464205	0.0228514	0.0231289	0.0756368	0.0316795
PcyM_0100400	1.90991	3.62546	1.56517	0.375212	1.64858	1.32307	1.21243	2.36685	1.13982
PcyM_0100500	0.0106482	0.276725	0.119572	0.0117572	0.0273028	0	0.00341145	0.135649	0.0106179
PcyM_0100600	0.942736	2.15227	0.282953	0.979518	0.529325	0.560754	1.53864	1.12599	0.90206
PcyM_0100700	0.678067	1.84087	0.596143	0.275713	0.46505	1.76313	1.95177	1.03836	1.11391
PcyM_0100800	1.16551	0.718429	0.0733786	0.105388	0.124954	0.0785048	0.119381	0.652441	0.107057
PcyM_0100900	1.88743	4.30659	1.00926	0.608663	0.538311	0.391028	16.1301	2.40109	4.41703
PcyM_0101000	0.657684	3.97515	3.91077	1.35069	1.56566	0.238578	1.88297	2.84787	1.25948
PcyM_0101100	0.283323	0.261061	0.0505573	0.0195469	0.0757401	0.118982	0.0385025	0.198314	0.0631929
PcyM_0101200	0.515671	1.50424	0.449119	0.354009	0.573416	0.126533	0.44041	0.82301	0.373592	PVX_078695, unspecified product
PcyM_0101300	2.10414	5.16857	2.25542	1.10303	2.39563	0.824622	0.547844	3.17604	1.21778
PcyM_0101400	0.0849754	0.119071	0.0518279	0.0243844	0.0545388	0.0359141	0.0875742	0.0852914	0.0506029
PcyM_0101500	1.75224	4.80887	1.13637	0.876888	2.06612	0.113783	0.345463	2.56583	0.850563
PcyM_0101600	0.559885	1.71359	0.632378	0.244449	0.577727	0.171376	0.793472	0.968618	0.446756
PcyM_0101700	2.11879	4.70331	1.17914	0.718552	0.572682	0.47033	18.5529	2.66708	5.07861
PcyM_0101800	0.363603	0.746058	0.138677	0.14356	0.198745	0.0862856	0.594753	0.416113	0.255836
PcyM_0101900	0.460002	3.31024	3.18103	1.05829	1.0638	0.207481	0.937154	2.31709	0.816681
PcyM_0102000	0.368312	0.443826	0.0530524	0.159362	0.199894	0.0829301	0.0527442	0.288397	0.123732
PcyM_0102100	2.03525	2.16365	0.80096	0.393718	0.445622	0.22575	0.228257	1.66662	0.323337
PcyM_0102200	1.88713	3.52704	0.918391	0.687583	1.14568	0.758188	0.657915	2.11085	0.812342
PcyM_0102300	0.0781543	0.131124	0.0986487	0.0483494	0.0491936	0.0833501	0.0695413	0.102642	0.0626086
PcyM_0102400	0.0615651	0.0679914	0.0148825	0.0129256	0.0444456	0.0761338	0.0264534	0.0481463	0.0399896
PcyM_0102500	3.83741	0.0767292	0.0192159	0.0113566	0.0589599	0.0456856	0.00157318	1.31112	0.0293938
PcyM_0102600	10.6717	9.77351	12.9775	0.0230213	2.74349	2.33105	0.114905	11.1409	1.30312
PcyM_0102700	0.15862	0.220861	0.038711	0.0374984	0.112515	0.218656	0.202486	0.139397	0.142789	PVX_087670, hypothetical protein, conserved
PcyM_0102800	0.133475	0.379386	0.0384134	0.089439	0.0510666	0.060698	0.0499529	0.183758	0.0627891
PcyM_0102900	8.41824	1.42637	0.248197	0.54306	18.3272	0.110021	0.245539	3.36427	4.80645	PVX_087680, chitinase (CHT1)
PcyM_0103000	17.9538	16.5309	5.66265	3.56754	19.3835	6.68307	1.97593	13.3824	7.9025
PcyM_0103100	6.6951	9.54422	0.656912	2.80841	3.85378	1.70234	2.05282	5.63208	2.60434
PcyM_0103200	44.6016	26.7852	82.2505	0.294627	1.89101	0.356707	0.122643	51.2124	0.666247	PVX_087685, centrin, putative
PcyM_0103300	20.8737	35.8792	14.2389	0.190878	1.05775	12.4131	0.261856	23.6639	3.48088	PVX_087690, hypothetical protein, conserved
PcyM_0103400	17.9384	24.467	0.155549	0.559833	0.733762	6.58774	1.033	14.187	2.22858	PVX_087695, hypothetical protein, conserved
PcyM_0103500	34.6611	41.626	42.2318	3.51319	0.110899	12.2667	3.3109	39.5063	4.80042	PVX_087700, hypothetical protein, conserved
PcyM_0103600	52.7002	2.99027	0.254142	0.541005	0.514	0.195951	0.261336	18.6482	0.378073	PVX_087705, hypothetical protein, conserved
PcyM_0103700	18.4408	31.8665	3.0708	0.116058	0.710646	7.82666	6.15676	17.7927	3.70253	PVX_087710, hypothetical protein, conserved
PcyM_0103800	1.48611	1.99813	0.5357	0.038309	0.0576525	0.0279771	0.00537195	1.33998	0.0323276	PVX_087715, hypothetical protein, conserved
PcyM_0103900	3.42695	1.2824	0.64151	0.049492	1.39243	0.105128	0.214479	1.78362	0.440382	PVX_087720, hypothetical protein, conserved
PcyM_0104000	0.129615	0.402384	0.979222	0.0448809	0.1265	0.0477582	0.00953119	0.50374	0.0571676
PcyM_0104100	8.6085	7.50343	15.9645	0.0098907	0.07312	0.596165	1.03455	10.6921	0.428432
PcyM_0104200	22.6238	15.0425	29.6732	0.185642	1.64504	1.29219	0.0173749	22.4465	0.785063	PVX_087735, hypothetical protein, conserved
PcyM_0104300	11.8897	14.1575	24.4708	0.0599278	0.422253	0.0184088	0.0135566	16.8394	0.128537	PVX_087740, hypothetical protein, conserved
PcyM_0104400	1.51461	2.72565	0.441726	0.0757389	0.0204331	0.0479715	0.0140611	1.56066	0.0395512	PVX_087745, hypothetical protein, conserved
PcyM_0104500	19.5266	14.2468	35.6008	2.51646	0.856819	1.19345	3.66836	23.1247	2.05877	PVX_087750, hypothetical protein, conserved
PcyM_0104600	1.12881	3.31381	0.385424	0.00623086	0.0165095	0.000942612	0.0297806	1.60935	0.0133659	PVX_087755, hypothetical protein, conserved
PcyM_0104700	7.3154	11.2397	7.65015	0.274563	0.159775	0.53951	0.0775676	8.73508	0.262854	PVX_087760, WD domain, G-beta repeat domain containing protein
PcyM_0104800	0.277842	23.3456	0.318857	3.07366	9.16283	0.0943895	0.0751264	7.98076	3.1015	PVX_087765, calcium-dependent protein kinase 3, putative
PcyM_0104900	32.2012	154.356	191.393	7.66379	4.12242	0.975758	4.6587	125.983	4.35517
PcyM_0105000	29.1543	20.6389	36.8663	0.0878617	0.753524	0.0140374	0.282359	28.8865	0.284446
PcyM_0105100	4.32427	3.96598	8.28057	1.29579	0.0756746	0.379041	0.0354328	5.52361	0.446485	PVX_087775, E3 ubiquitin-protein ligase, putative
PcyM_0105200	1.21818	4.8327	0.129737	6.49079	0.111445	0.0149286	0.0198479	2.06021	1.65925
PcyM_0105300	4.3103	1.50809	14.0384	0.0124419	0.120366	0.0617232	0.0970731	6.61892	0.0729012	PVX_087780, phosphopantetheine adenylyltransferase, putative (PPAT)
PcyM_0105400	7.07553	8.68457	13.074	0.0182542	0.899823	0.716421	0.0614811	9.61136	0.423995	PVX_087785, hypothetical protein, conserved
PcyM_0105500	72.5452	1.75084	1.62744	0.357257	0.646635	0.0376663	3.29756	25.3078	1.08478	PVX_087790, peptide chain release factor, putative
PcyM_0105600	18.0331	15.7649	17.7942	0.813032	3.02986	0.207724	0.839366	17.1974	1.2225	PVX_087795, methyltransferase, putative
PcyM_0105700	3.41661	0.199518	0.0595981	0.0611674	0.216488	0.082386	0.0314543	1.22524	0.0978738	PVX_087800, hypothetical protein, conserved
PcyM_0105800	1.11848	1.85741	3.29443	0.00990175	0.0204056	0.00569716	0.00810277	2.09011	0.0110268	PVX_087802, hypothetical protein, conserved
PcyM_0105900	62.6893	121.498	218.022	6.23366	3.019	4.37872	20.6757	134.069	8.57678	PVX_087805, origin recognition complex subunit 2, putative (ORC2)
PcyM_0106000	53.7084	68.1046	39.2616	0.0866753	1.52753	3.66103	0.415653	53.6915	1.42272	PVX_087810, DNA replication licensing factor MCM7, putative (MCM7)
PcyM_0106100	28.8092	56.427	16.0873	5.12683	2.62431	0.0483786	0.598763	33.7745	2.09957	PVX_087815, inositol-phosphate phosphatase, putative
PcyM_0106200	29.9802	31.2427	8.09459	1.73373	0.104408	0.0586088	0.383993	23.1058	0.570185	PVX_087820, RNA helicase, putative
PcyM_0106300	29.18	45.4883	42.5093	0.268089	0.0772674	0.621089	0.420608	39.0592	0.346763	PVX_087825, 40S ribosomal protein S29, putative
PcyM_0106400	5.57476	2.71112	89.8602	0.0450159	0.507036	0.168843	0.476082	32.7154	0.299244	PVX_087830, cysteine-rich secretory protein, putative
PcyM_0106500	316.01	167.263	319.661	5.58899	11.4433	6.89528	3.82672	267.645	6.93857	PVX_087835, ATP synthase lipid-binding protein, mitochondrial precursor, putative
PcyM_0106600	281.965	331.36	507.412	13.3661	15.9081	22.3731	18.4883	373.579	17.5339	PVX_087840, importin-7, putative
PcyM_0106700	31.2944	14.9664	3.45297	0.495491	0.371677	0.0298102	2.28734	16.5713	0.79608
PcyM_0106800	5.12883	0.358125	1.30134	0.134992	0.0211926	0.00192477	0.0881699	2.26276	0.0615697	PVX_087845, hypothetical protein, conserved
PcyM_0106900	0.118148	0.398306	0.706118	0.102521	0.114972	0.0569328	0.0279866	0.407524	0.0756033
PcyM_0107000	0.24639	0.627841	0.290869	0.0905527	0.251495	0.0683891	0.332195	0.388367	0.185658
PcyM_0107100	249.28	144.041	350.188	8.16977	28.3187	22.2208	4.17279	247.836	15.7205	PVX_087851, hypothetical protein
PcyM_0107200	12.6469	1.34535	0.0581138	0.0145767	0.043168	0.157083	0.0167918	4.68346	0.0579048
PcyM_0107300	0.323762	1.12771	0.195716	0.0388458	0.0725363	0.181932	0.0522748	0.549064	0.0863971
PcyM_0107400	70.9331	68.4622	34.8554	6.51743	5.97926	0.166029	1.07142	58.0836	3.43353
PcyM_0107500	32.4755	36.5265	0.0193601	7.51866	2.02114	0.0189716	0.0998874	23.0071	2.41466	PVX_087870, hypothetical protein, conserved
PcyM_0107600	0.132711	7.16113	0.280138	0.252048	0.0452867	0.0471208	0.0288928	2.52466	0.093337	PVX_085160, DNA mismatch repair enzyme, putative; PVX_087875, DNA mismatch repair enzyme, putative
PcyM_0107700	3.82063	4.56278	0.655248	2.00603	3.35209	2.20612	1.04167	3.01289	2.15148
PcyM_0107800	27.9869	19.6589	2.53977	9.06318	22.23	22.1568	7.10224	16.7285	15.1381
PcyM_0107900	3.74012	3.43163	0.462343	0.226998	0.58199	1.82845	0.631437	2.5447	0.817219
PcyM_0108000	2.43191	3.87597	0.240858	0.609529	0.96215	0.180385	0.224416	2.18291	0.49412
PcyM_0108100	11.7617	17.6196	13.5832	0.0826848	1.67461	0.0153834	0.0857531	14.3215	0.464607	PVX_087880, hypothetical protein, conserved
PcyM_0108200	0.614297	1.71193	0.0544178	0.0673808	0.0903392	0.104893	0.0677574	0.793548	0.0825927	PVX_087885, rhoptry-associated membrane antigen, putative
PcyM_0108300	0.551666	3.50036	4.14565	1.07341	0.136312	0.0191406	0.0560799	2.73256	0.321235	PVX_087895, AAA family ATPase, putative
PcyM_0108400	19.7732	34.794	72.533	4.81971	0.218557	0.712385	5.71661	42.3668	2.86682	PVX_087900, hypothetical protein, conserved
PcyM_0108500	2.89118	18.4001	0.102565	0.119018	0.341546	0.147116	0.0869102	7.13129	0.173648	PVX_087905, hypothetical protein, conserved
PcyM_0108600	0.363004	0.0133339	0.301799	0.00361577	0.0228961	0.00285975	0.00171151	0.226046	0.00777079
PcyM_0108700	66.5934	71.6071	369.948	14.0779	14.3283	9.31716	92.8858	169.383	32.6523	PVX_087915, RAP protein, putative
PcyM_0108800	2.04746	3.74271	1.67051	2.3194	0.0380467	0.0940427	0.0907902	2.48689	0.635571	PVX_087920, ribosomal protein S8e, putative
PcyM_0108900	1.47399	0.266577	0.0659231	0.0457831	0.169957	0.0626665	0.155145	0.602162	0.108388	PVX_087925, cytoskeleton associated protein, putative
PcyM_0109000	8.18066	5.70267	8.34092	0.761219	0.310584	0.38939	5.07293	7.40808	1.63353	PVX_087930, hypothetical protein
PcyM_0109100	13.5131	0.514599	0.688084	0.0522489	0.0923358	0.435039	0.0229977	4.90526	0.150655
PcyM_0109200	1.95885	0.0362235	0.0136792	0.00427898	0.0383922	0.058934	0.00102654	0.669584	0.0256579
PcyM_0109300	62.9258	58.422	256.063	9.5628	16.8966	21.5404	3.83471	125.803	12.9586	PVX_087945, EKC/KEOPS complex subunit BUD32, putative (BUD32)
PcyM_0109400	342.198	332.416	452.595	9.38817	9.62522	12.5879	11.6651	375.737	10.8166	PVX_087950, heat shock protein 86, putative
PcyM_0109500	60.3329	22.9681	407.721	3.05935	1.06883	0.707087	0.781787	163.674	1.40427
PcyM_0109600	6.98095	4.62729	3.56716	0.377623	0.45072	0.0271979	0.0621749	5.05847	0.229429
PcyM_0109700	34.5231	24.9889	43.9539	0.195849	10.7583	0.0425662	0.287747	34.4886	2.82111	PVX_087960, inner membrane complex protein 1d, putative (IMC1d)
PcyM_0109800	87.5938	71.1173	139.276	2.66746	2.46348	6.94213	0.108821	99.3292	3.04547	PVX_087965, cloroquine resistance associated protein Cg8, putative
PcyM_0109900	17.3599	19.122	34.903	0.146975	1.27857	0.180461	0.119807	23.795	0.431452	PVX_087970, heat shock protein 110, putative (HSP110c)
PcyM_0110000	3.51917	3.42102	34.6819	0.0409813	0.0513729	0.0561116	0.0936825	13.874	0.0605371	PVX_087975, cloroquine resistance associated protein Cg3, putative
PcyM_0110100	3.34809	2.17176	0.636814	0.275893	1.12416	0.325359	1.32978	2.05222	0.763798
PcyM_0110200	3.31904	7.04262	34.525	2.05965	3.97038	3.75484	1.62835	14.9622	2.85331
PcyM_0110300	7.19439	4.12593	10.2299	0.161244	0.189668	0.105185	0.105067	7.1834	0.140291
PcyM_0110400	150.278	102.938	234.591	27.7668	10.4706	15.7705	18.7233	162.603	18.1828	PVX_087985, cloroquine resistance associated protein cg1, putative
PcyM_0110500	4.98184	0.294889	0.385907	0.0443241	0.0521882	0.0237053	0.0228545	1.88755	0.035768
PcyM_0110600	4.68551	2.36026	6.42977	2.91367	0.0159958	0.0161516	0.0180851	4.49185	0.740975	PVX_087995, cloroquine resistance associated protein Cg2, putative
PcyM_0110700	34.5021	12.6983	173.513	1.36841	11.1939	11.4655	0.254746	73.571	6.07066	PVX_088000, cloroquine resistance asscociatd protein Cg7, putative
PcyM_0110800	12.3163	6.47385	0.416817	0.417394	0.957113	0.187915	0.646022	6.40231	0.552111	PVX_088005, hypothetical protein, conserved
PcyM_0110900	164.074	201.003	145.365	14.8592	6.93587	0.448139	0.466811	170.148	5.67751	PVX_088007, ribonucleases P/MRP protein subunit POP1, putative (POP1)
PcyM_0111000	125.288	142.738	3.24237	21.3387	7.73569	0.254704	3.62626	90.4227	8.23885	PVX_088010, lysophospholipase, putative
PcyM_0111100	43.0605	0.553118	99.2322	0.132592	0.374439	0.546349	0.242819	47.6153	0.32405	PVX_088015, lysophospholipase, putative
PcyM_0111200	0.966187	3.73707	6.56567	1.35102	3.33353	0.472049	3.01324	3.75631	2.04246	PVX_088020, conserved protein, unknown function
PcyM_0111300	9.33968	19.1607	21.3715	1.06976	0.243571	2.7777	0.0463824	16.624	1.03435
PcyM_0111400	79.7068	116.402	68.3969	4.05968	13.5534	24.0401	1.41145	88.1686	10.7662	PVX_088035, hypothetical protein, conserved
PcyM_0111500	0.353266	0.601113	0.17738	0.176436	0.167608	0.0211397	0.0215662	0.377253	0.0966873
PcyM_0111600	37.8797	18.3904	13.8156	1.20833	0.0898581	0.0168546	14.0939	23.3619	3.85222	PVX_088040, hypothetical protein, conserved
PcyM_0111700	0.851535	1.75008	8.00078	0.00853381	0.00482184	0.030571	0.0133688	3.53413	0.0143239	PVX_088045, hypothetical protein, conserved
PcyM_0111800	106.261	116.872	125.733	4.08676	12.0998	0.812283	0.878772	116.288	4.46941	PVX_088050, hypothetical protein, conserved
PcyM_0111900	82.2334	109.652	99.3706	9.15544	4.57092	5.79635	4.23493	97.0854	5.93941	PVX_088055, DNA repair protein RAD14, putative (RAD14)
PcyM_0112000	21.5287	97.1648	27.6728	6.11149	4.50046	1.1884	7.28529	48.7888	4.77141	PVX_088060, hypothetical protein, conserved
PcyM_0112100	352.809	461.542	502.094	21.8482	34.4241	11.9156	19.2737	438.815	21.8654	PVX_088065, 60S ribosomal protein L34, putative (RPL34)
PcyM_0112200	7.00227	3.83873	2.34255	0.200226	0.142923	0.435394	0.120242	4.39452	0.224696	PVX_088070, hypothetical protein, conserved
PcyM_0112300	18.7148	10.0691	96.0762	0.0310611	0.0348761	0.0422566	4.61729	41.62	1.18137	PVX_088075, hypothetical protein, conserved
PcyM_0112400	67.6017	67.3943	81.0233	1.44245	2.26692	5.10394	1.79433	72.0064	2.65191	PVX_088080, 50S ribosomal protein L1, mitochondrial, putative (RPL1)
PcyM_0112500	2.50001	3.60625	0.475598	0.0362629	0.975325	0.00720252	0.015397	2.19395	0.258547
PcyM_0112600	3.65956	5.10783	3.16077	1.13495	1.81007	0.368842	0.464455	3.97605	0.944579
PcyM_0112700	37.6804	55.0681	56.0122	4.28559	5.10003	18.3488	3.12977	49.5869	7.71604	PVX_088095, hypothetical protein, conserved
PcyM_0112800	54.7693	33.4464	75.8363	0.894253	1.36923	0.101861	1.83529	54.684	1.05016	PVX_088105, hypothetical protein, conserved
PcyM_0112900	0.0461464	0.130014	0.00554241	0.0140227	0.013761	0.0384854	0.0473156	0.0605676	0.0283962	PVX_088110, regulator of chromosome condensation, putative
PcyM_0113000	476.612	528.204	1137.57	21.0322	7.20714	30.182	66.1494	714.128	31.1427	PVX_088115, coatomer epsilon subunit, putative
PcyM_0113100	245.523	226.799	486.599	0.140649	3.57548	19.3176	2.72836	319.64	6.44052	PVX_088120, NSFL1 cofactor p47, putative
PcyM_0113200	0.996973	18.0278	7.33204	0.0207385	0.298056	0.805823	0.0675702	8.7856	0.298047	PVX_088125, aspartyl protease, putative
PcyM_0113300	3.50953	1.10873	0.552462	0.12493	0.206354	0.118656	0.517349	1.72357	0.241822	PVX_088130, AP-3 complex subunit delta, putative
PcyM_0113400	111.675	126.646	326.549	0.118973	0.869042	39.3852	1.27345	188.29	10.4117
PcyM_0113500	9.54487	3.11524	0.0349303	0.0226827	0.0716743	0.036775	0.108493	4.23168	0.0599063	PVX_088140, hypothetical protein, conserved
PcyM_0113600	11.7316	25.8239	3.52729	1.18688	0.125691	0.0923778	0.0259494	13.6943	0.357723	PVX_088145, tyrosine--tRNA ligase, putative
PcyM_0113700	1.02486	0.922699	0.0143822	0.0217494	0.0689401	0.0836764	0.0329894	0.653982	0.0518388	PVX_088150, 26S proteasome regulatory subunit RPN10, putative (RPN10)
PcyM_0113800	1.95268	0.275919	1.59879	0.0273168	0.0658542	0.0830173	0.00807857	1.2758	0.0460667	PVX_088155, serine protease DegP, putative (DegP)
PcyM_0113900	31.8367	11.6768	12.2793	0.223381	0.0525205	0.853752	0.353862	18.5976	0.370879	PVX_088165, hypothetical protein, conserved
PcyM_0114000	106.476	144.438	219.059	10.681	4.42512	0.703709	3.84881	156.658	4.91467	PVX_088170, proteasome subunit alpha type-6, putative
PcyM_0114100	36.891	69.8635	39.0455	0.236091	1.71692	0.787849	2.79649	48.6	1.38434
PcyM_0114200	1.99496	0.404634	0.230135	0.0207017	0.0295276	0.141263	0.0211307	0.876577	0.0531557
PcyM_0114300	6.89726	0.730486	17.2309	0.195899	1.01282	0.0490941	0.856645	8.28622	0.528614
PcyM_0114400	18.3749	1.33582	0.191551	0.18352	0.557728	0.257246	0.0976985	6.63411	0.274048
PcyM_0114500	1.32112	0.652056	0.276623	0.0663908	0.207762	0.0689528	0.675242	0.749932	0.254587
PcyM_0114600	36.0785	32.8732	27.5389	1.75881	4.06295	1.52197	5.09196	32.1635	3.10892	PVX_088190, helicase, putative
PcyM_0114700	1.82401	0.524401	0.298626	0.180984	0.193456	0.399422	0.0915926	0.882346	0.216364
PcyM_0114800	259.992	230.136	469.305	27.7925	19.6629	4.42404	4.76672	319.811	14.1615	PVX_088190, helicase, putative
PcyM_0114900	46.3894	46.8872	37.1729	8.38092	2.08757	0.223615	2.30096	43.4831	3.24827
PcyM_0115000	3.35338	1.88536	112.077	10.0943	0.00431158	0.906151	0.0929833	39.1054	2.77443	PVX_088200, hypothetical protein, conserved
PcyM_0115100	4.09382	3.71285	3.31077	0.302975	0.351923	0.239727	0.0785633	3.70581	0.243297	PVX_088205, vacuolar proton translocating ATPase subunit A, putative
PcyM_0115200	9.94436	36.5916	6.53019	0.189578	0.0469327	0.405992	3.64061	17.6887	1.07078	PVX_088210, protein tyrosine phosphatase, putative (PTP2)
PcyM_0115300	28.992	34.0791	51.4675	1.21372	4.01023	0.227279	0.0135816	38.1795	1.3662	PVX_088215, hypothetical protein, conserved
PcyM_0115400	6.88536	0.977564	0.35263	0.0946713	0.132342	0.0675399	0.0185299	2.73852	0.0782706	PVX_088220, kinesin, putative
PcyM_0115500	70.1688	125.65	8.42097	5.43293	0.147722	0.275988	0.233038	68.0798	1.52242	PVX_088225, DnaJ domain containing protein
PcyM_0115600	193.033	209.194	471.29	10.6423	9.01302	5.29225	3.32405	291.172	7.06789	PVX_088230, glycosyltransferase, putative
PcyM_0115700	0.7211	1.42939	0.121489	0.6649	0.156013	0.105973	0.101517	0.757326	0.257101	PVX_088235, ferlin, putative
PcyM_0115800	99.7162	77.3057	141.067	9.48493	5.5945	0.125205	0.0547396	106.029	3.81484	PVX_088240, hypothetical protein, conserved
PcyM_0115900	2.30606	5.76991	7.57075	0.657934	0.592791	2.72819	0.258165	5.21557	1.05927
PcyM_0116000	52.2689	60.6731	68.6864	0.194015	0.307005	0.326403	36.2493	60.5428	9.26918	PVX_088245, hypothetical protein, conserved
PcyM_0116100	5.14849	0.129875	0.114485	0.0519607	0.041078	0.0397503	0.525758	1.79762	0.164637	PVX_088250, AAA family ATPase, putative
PcyM_0116200	17.7374	21.3727	13.8807	1.80832	0.254373	0.00843292	0.133	17.6636	0.55103	PVX_088254, hypothetical protein, conserved
PcyM_0116300	22.8439	65.7509	24.5147	0.261233	2.93601	0.0751348	0.254104	37.7032	0.881621	PVX_088256, hypothetical protein, conserved
PcyM_0116400	0.865266	1.15267	0.462098	0.0218914	0.0338334	0.0242515	0.046462	0.826677	0.0316096	PVX_088265, serine/threonine protein kinase, FIKK family
PcyM_0116500	0.367024	0.558231	0.0909704	0.171751	0.219896	0.272841	0.24614	0.338742	0.227657
PcyM_0116600	0.0522668	0.0129137	0.0267593	0.0376582	0.0721053	0.00161616	0.173543	0.0306466	0.0712306	PVX_088270, PAP2-like protein, putative
PcyM_0116700	1.82904	1.13522	0.12038	0.00506306	0.00931377	0.0174649	0.0288891	1.02821	0.0151827
PcyM_0116800	15.4322	43.8589	31.9758	0.0570627	1.90917	1.67974	1.29736	30.4223	1.23583	PVX_088280, hypothetical protein, conserved
PcyM_0117000	0.0387417	0.0325438	18.9244	0.0290992	0.0459082	0.0965378	0.0201994	6.33189	0.0479361	PVX_093495, hypothetical protein, conserved
PcyM_0117100	0.842597	3.31121	0.352962	1.48076	1.14725	2.84717	0.0747655	1.50226	1.38749
PcyM_0117200	2.02483	1.27675	0.0440556	0.0174394	0.095179	0.00330363	0.0199115	1.11521	0.0339584
PcyM_0117300	8.26996	3.64647	0.350572	1.14169	1.87046	0.560723	1.16157	4.089	1.18361	PVX_093505, hypothetical protein, conserved
PcyM_0117400	136.173	95.1283	104.656	2.899	1.06838	3.61451	19.172	111.986	6.68847	PVX_093510, hypothetical protein, conserved
PcyM_0117500	54.5196	17.1966	80.2552	5.2209	10.8469	71.9493	0.0144844	50.6572	22.0079
PcyM_0117600	56.8639	6.19934	176.224	1.62657	0.132158	1.20696	0.00657445	79.7624	0.743064
PcyM_0117700	3.68456	3.35979	5.78287	2.58461	0.677678	0.492866	0.436012	4.27574	1.04779	PVX_093515, GTPase-activating protein, putative
PcyM_0117800	20.9112	0.264532	15.6746	0.12537	0.7784	0.0951457	0.113807	12.2835	0.278181
PcyM_0117900	13.6095	13.4698	20.4398	0.369417	0.156853	0.0969224	0.133438	15.8397	0.189157	PVX_093525, hypothetical protein
PcyM_0118000	302.007	258.632	214.099	52.2858	23.3001	0.267162	4.07301	258.246	19.9815	PVX_093530, pseudouridylate synthase 1, putative
PcyM_0118100	81.4215	93.7919	86.6261	3.81995	1.04633	1.14565	4.44978	87.2798	2.61543
PcyM_0118200	3.9054	8.4905	0.0693486	0.574016	0.0158293	0.016808	1.27951	4.15508	0.471541	PVX_093535, hypothetical protein, conserved
PcyM_0118300	74.8395	94.5459	54.2836	3.14327	0.218397	2.72623	0.131921	74.5563	1.55496	PVX_093540, methionine aminopeptidase 1c, putative (METAP1c)
PcyM_0118400	18.4903	51.0254	0.382935	0.068257	0.362401	0.0645359	0.123129	23.2996	0.154581	PVX_093545, hypothetical protein, conserved
PcyM_0118500	3.53792	4.31894	0.601727	0.135124	0.161051	0.103003	0.0908423	2.81953	0.122505	PVX_093550, cactin homolog, putative
PcyM_0118600	26.5903	15.1938	38.4847	2.94088	0.138529	0.310379	0.0814082	26.7563	0.867799	PVX_093555, proteasome subunit beta type-4, putative
PcyM_0118700	37.1206	25.8534	48.7224	2.21822	1.90045	0.390119	3.72689	37.2321	2.05892	PVX_093560, tubulin gamma chain, putative
PcyM_0118800	16.7538	14.5839	0.989259	1.30889	0.0125998	0.537862	0.0387757	10.7757	0.474533	PVX_093565, hypothetical protein, conserved
PcyM_0118900	0.151774	0.188638	0.0270948	0.132571	0.302464	0.493155	0.0361974	0.122502	0.241097
PcyM_0119000	36.4491	45.4879	753.437	6.61182	6.79308	3.61881	106.413	278.458	30.8591	PVX_093570, AAA family ATPase, putative
PcyM_0119100	3.2991	45.8512	225.363	0.0539459	22.0224	0.167871	0.0198535	91.5044	5.56601
PcyM_0119200	9.38454	0.345208	26.6056	0.00714229	0.626275	0.0382258	3.79153	12.1118	1.11579	PVX_093575, DNA repair protein RAD54, putative (RAD54)
PcyM_0119300	0.214763	0.350739	0.251822	0.0394436	0.0824466	0.0474668	0.322844	0.272441	0.12305
PcyM_0119400	28.5815	11.1875	47.7974	2.03583	0.101853	13.699	0.0765107	29.1888	3.97831	PVX_093585, SF-assemblin, putative
PcyM_0119500	312.643	275.492	445.942	15.6691	0.918113	19.0051	40.5424	344.692	19.0337	PVX_093590, hypothetical protein, conserved
PcyM_0119600	99.4013	142.934	121.656	2.57817	6.38919	9.46646	21.2209	121.331	9.91368	PVX_093595, peptidyl-prolyl cis-trans isomerase, putative
PcyM_0119700	42.4805	36.9453	70.7703	11.6238	6.32202	3.93543	0.748994	50.0654	5.65757	PVX_093605, serine/threonine protein phosphatase 2B catalytic subunit A, putative (CNA)
PcyM_0119800	54.0711	68.8539	0.671276	1.21475	1.21481	0.105559	0.00375005	41.1988	0.634719	PVX_093607, conserved Plasmodium protein, unknown function
PcyM_0119900	5.64662	2.9723	0.250453	0.186315	0.781637	0.207862	19.0203	2.95646	5.04903
PcyM_0120000	11.505	3.25937	9.78954	0.732515	0.169292	0.0585204	1.32883	8.18464	0.57229
PcyM_0120100	56.7126	68.7209	231.721	2.09638	0.330417	1.43872	2.51092	119.052	1.59411	PVX_093615, inositol 5-phosphatase, putative
PcyM_0120200	52.9599	52.2793	40.322	13.3732	9.56115	0.223155	0.434663	48.5204	5.89804	PVX_093620, hypothetical protein, conserved
PcyM_0120300	81.1728	51.665	253.702	0.252815	3.59903	5.07941	0.36825	128.846	2.32488	PVX_093625, hypothetical protein, conserved
PcyM_0120400	933.089	659.855	788.805	11.0066	7.62404	23.3505	37.3072	793.916	19.8221	PVX_093630, 1-cys peroxiredoxin (1-CysPrx)
PcyM_0120500	1.34778	0.889238	2.2759	0.00968206	0.191671	0.0495553	0.298214	1.50431	0.137281
PcyM_0120600	0.355818	19.6518	3.9882	0.150935	1.28187	0.0739479	0.057869	7.99861	0.391156
PcyM_0120700	98.6245	54.0801	212.941	4.52213	3.88699	7.01885	10.4678	121.882	6.47394	PVX_093640, NAD-specific glutamate dehydrogenase, putative
PcyM_0120800	11.6997	30.0456	18.9314	4.34228	0.620051	2.26776	1.94179	20.2255	2.29297	PVX_093645, hypothetical protein, conserved
PcyM_0120900	30.3032	21.3989	42.7585	1.42703	6.28482	0.437915	1.16903	31.4869	2.3297	PVX_093650, mannose-6-phosphate isomerase, putative
PcyM_0121000	2.66499	2.11448	0.0880808	0.0411395	0.0832876	0.0336498	0.0470153	1.62252	0.0512731	PVX_093655, sentrin-specific protease 2, putative (SENP2)
PcyM_0121100	24.0463	6.03697	5.33705	0.110886	0.37319	0.0334145	0.0959199	11.8068	0.153352	PVX_093660, hypothetical protein, conserved
PcyM_0121200	17.4591	16.1466	10.5876	0.711095	0.234948	0.199714	0.272403	14.7311	0.35454	PVX_093665, hypothetical protein, conserved
PcyM_0121300	0.602513	0.0147734	0.0358813	1.10252	0.178178	1.19393	0.192221	0.217723	0.666711	PVX_093670, protein kinase, putative
PcyM_0121400	4.28378	1.65584	0.496858	0.714906	1.31656	0.694754	0.211713	2.14549	0.734483	PVX_093675, von Willebrand factor A domain-related protein, putative (WARP)
PcyM_0121500	8.70458	3.97542	6.51977	15.1323	1.32975	0.519949	0.0743002	6.39993	4.26408
PcyM_0121600	31.5508	7.19828	101.873	4.59233	1.44307	4.60332	14.7175	46.8741	6.33905
PcyM_0121700	0.0284613	0.0286473	0.019254	0.0829959	0.151903	0.217021	0.191277	0.0254542	0.160799	PVX_093680, Phist protein (Pf-fam-b)
PcyM_0121800	1.46807	2.74128	290.684	0.0381256	0.0795968	2.26058	0.0559402	98.2978	0.60856
PcyM_0121900	11.7136	0.286203	0.535046	0.106349	0.0887926	0.0281935	0.0261673	4.17827	0.0623757
PcyM_0122000	1.00811	2.29389	0.661769	0.443749	1.69117	2.10251	2.32118	1.32126	1.63965	PVX_093685, Plasmodium exported protein, unknown function
PcyM_0122100	0.0263408	0.745574	0.365381	0.0720978	0.261582	0.104721	0.249639	0.379099	0.17201
PcyM_0122200	0.033225	0.0329186	0.0250181	0.00894234	0.00952474	0.131892	0.0381775	0.0303872	0.0471341
PcyM_0122300	0.08418	0.128718	0.00410523	0.0154782	0.132604	0.0205389	0.088724	0.0723344	0.0643362
PcyM_0122400	1.57064	2.96641	0.831616	0.881325	1.09701	0.217114	0.624444	1.78956	0.704973
PcyM_0122500	1.5926	1.87105	1.37489	0.304143	0.765281	1.11829	0.320107	1.61285	0.626957
PcyM_0122600	2.3847	4.99895	3.76846	0.916272	0.629947	0.74508	1.50965	3.71737	0.950237	PVX_093720, variable surface protein Vir24-like
PcyM_0122700	0.245287	0.148322	0.058055	0.0442003	0.0987048	0.00572151	0.104799	0.150555	0.0633565
PcyM_0122800	0.511887	0.573167	0.228163	0.261801	0.737515	1.42807	1.11931	0.437739	0.886673
PcyM_0122900	1.01123	0.22572	0.0356411	0.0542233	0.248576	0.0610126	0.0562654	0.424196	0.105019
PcyM_0123000	1.6969	2.69615	0.694378	0.584436	2.3826	1.33665	0.331639	1.69581	1.15883
PcyM_0123100	0.964962	0.899908	0.488368	0.114652	0.109233	1.58624	0.0493237	0.784413	0.464862
PcyM_0123200	0.0276621	0.08508	0.0123425	0.00991088	0.0206784	0.0108606	0.0306466	0.0416949	0.0180241
PcyM_0123300	1.16611	1.07614	0.13509	0.297218	0.758443	0.467871	0.13211	0.792448	0.413911	PVX_121876, Plasmodium exported protein, unknown function
PcyM_0123400	0.162594	0.631689	0.198708	0.11917	0.210839	0.0468329	0.195215	0.330997	0.143014
PcyM_0123500	0.103086	0.608446	0.155515	0.203295	0.249879	0.0329805	0.107889	0.289016	0.148511
PcyM_0123600	0.607469	2.10521	2.12959	0.151657	0.200135	0.0436252	1.55757	1.61409	0.488247
PcyM_0123700	0.64783	5.5492	0.295684	2.05643	1.18841	0.950165	0.761216	2.16424	1.23906
PcyM_0123800	1.64988	4.58232	1.74935	0.705252	0.69436	0.286053	0.231722	2.66051	0.479347
PcyM_0123900	0.391813	0.338091	0.0498487	0.122697	0.234057	0.0295502	0.0320834	0.259917	0.104597
PcyM_0124000	3.1334	4.94357	1.83667	0.238201	0.692953	0.034221	0.38649	3.30455	0.337966
PcyM_0124100	1.0478	1.58982	3.8856	0.510842	0.90932	0.201217	0.202369	2.17441	0.455937
PcyM_0124200	0.158769	0.284449	0.552942	0.0359235	0.106151	0.0376152	0.0323682	0.332053	0.0530146
PcyM_0200100	0.586435	2.86283	0.992208	0.523978	0.982259	0.351941	0.678847	1.48049	0.634256
PcyM_0200200	0.0890939	0.628328	0.083249	0.0580238	0.11511	0.00922816	0.0193852	0.26689	0.0504369
PcyM_0200300	7.37203	0.524964	0.540253	0.316642	0.279747	0.110205	0.528194	2.81242	0.308697	PVX_078695, unspecified product
PcyM_0200400	0.0441151	0.236159	0.0878872	0.0607149	0.0686544	0.0719361	0.0220143	0.12272	0.0558299
PcyM_0200500	13.6837	0.0568163	0.383706	0.0260617	0.0124382	0.00608081	0.247367	4.70807	0.072987
PcyM_0200600	2.98971	6.55726	1.81073	0.609306	0.789236	0.41951	0.529262	3.7859	0.586829
PcyM_0200700	2.89729	5.0481	3.23224	0.428077	1.16653	0.45143	0.85196	3.72587	0.7245	PVX_001640, VIR protein
PcyM_0200800	0.604206	0.14448	0.00648783	0.670193	0.038154	0.0137956	0.128127	0.251724	0.212567	PVX_001645, variable surface protein Vir12-related
PcyM_0200900	6.55704	1.30923	0.331747	0.109344	0.776147	0.135759	0.185497	2.73267	0.301687
PcyM_0201000	0.22562	0.120896	0.501391	0.0221818	0.0593413	0.00820476	0.00857303	0.282635	0.0245752
PcyM_0201100	0.0719158	0.134593	0.192186	0.0406457	0.0346146	0.0244835	0.0825873	0.132898	0.0455828
PcyM_0201200	8.99652	3.99458	6.23899	0.362589	1.22777	0.467392	1.30912	6.41003	0.841717
PcyM_0201300	0.0257336	0.0813446	0.0218202	0.0134012	0.102648	0.0180407	0.00463472	0.0429661	0.0346812
PcyM_0201400	0.0750033	0.0457038	0.222021	0.0166214	0.066375	0.289182	0.230762	0.114243	0.150735
PcyM_0201500	0.068712	0.144193	0.233357	0.0272828	0.0322484	0.00785763	0.0126075	0.148754	0.0199991
PcyM_0201600	4.05535	5.30291	2.49786	1.67969	1.11021	0.748882	0.87384	3.95204	1.10315
PcyM_0201700	0.245419	0.38543	0.264143	0.0640254	0.11625	0.104611	0.0727654	0.298331	0.0894131
PcyM_0201800	1.12322	5.68854	0.692296	0.447548	0.795462	2.26681	1.44495	2.50135	1.23869	PVX_106730, unspecified product
PcyM_0201900	0.050246	0.0677936	0.0563969	0.0427222	0.0141064	0.00617956	0.0184898	0.0581455	0.0203745
PcyM_0202000	0.016617	0.0329459	0.250048	0.00920185	0.00793378	0.0166376	0.00804179	0.0998704	0.0104537
PcyM_0202100	1.30142	3.51948	1.01968	1.28156	1.77946	0.141562	0.243176	1.94686	0.861438
PcyM_0202200	1.80669	10.7135	6.332	0.482999	0.108594	0.106324	0	6.28407	0.174479
PcyM_0202300	0.75966	1.2306	0.390883	0.193476	0.571891	0.424628	0.262003	0.793715	0.362999	PVX_096950, tryptophan-rich antigen (Pv-fam-a)
PcyM_0202400	3.70197	7.03136	1.79147	1.08426	3.85632	2.17462	0.932416	4.17493	2.01191
PcyM_0202500	0.0038351	0.0449229	0.0254167	0.0211514	0.0778102	0.0945511	0.0700467	0.0247249	0.0658898	PVX_096955, Plasmodium exported protein, unknown function
PcyM_0202600	0.0164475	0.0573099	14.6051	0.0259531	0.0641798	0.0736739	0.0726239	4.89296	0.0591077	PVX_096965, VIR protein; PVX_096975, VIR protein
PcyM_0202700	0.0676077	0.174039	1.74617	0.0383487	0.0973189	0.0793985	0.136712	0.662606	0.0879444	PVX_096970, variable surface protein Vir8-related
PcyM_0202800	0.00836818	0.00934644	0.0167207	0.0213451	0.0266074	0.124986	0.0765527	0.0114784	0.0623727
PcyM_0202900	4.73678	0.229926	0.94779	0.0855424	0.126712	0.0588983	0.207041	1.9715	0.119549	PVX_096965, VIR protein; PVX_096975, VIR protein
PcyM_0203000	0.0273529	0.0355844	0.00722973	0.017714	0.0652584	0.133781	0.0171643	0.023389	0.0584793
PcyM_0203100	0.628966	3.72189	0.0213753	0.187162	0.461538	0.25145	0.101077	1.45741	0.250307	PVX_096987, VIR protein
PcyM_0203200	1.02375	0.727257	0.123672	0.685351	0.215468	0.287444	0.232286	0.624893	0.355137
PcyM_0203300	0.272501	2.618	1.29207	1.16649	1.15797	0.198304	0.933135	1.39419	0.863974	PVX_096990, Pv-fam-d protein
PcyM_0203400	0.202124	0.233463	0.0104795	0.0251398	0.132117	0.107442	0.0771685	0.148689	0.0854668	PVX_096992, Plasmodium exported protein, unknown function
PcyM_0203500	0.382692	0.21206	0.0851324	0.0293937	0.128942	0.112157	0.0518074	0.226628	0.0805752	PVX_096995, tryptophan-rich antigen (Pv-fam-a)
PcyM_0203600	29.8003	44.3857	253	0.96927	3.13923	8.60422	15.3613	109.062	7.01851
PcyM_0203700	72.499	7.68613	0.497497	1.87075	0.0271826	0.0158586	0.0073845	26.8942	0.480295
PcyM_0203800	0.00544176	0.0262464	0.0901775	0.00346359	0.0608436	0.0632096	0.0710266	0.0406219	0.0496359	PVX_097005, Plasmodium exported protein, unknown function
PcyM_0203900	0.307529	3.90725	0.00495105	0.00898536	0.00603662	0.139071	0.000268371	1.40658	0.0385903
PcyM_0204000	7117.76	5421.61	969.962	273.778	179.552	155.658	112.62	4503.11	180.402
PcyM_0204100	3.44793	3.80724	5.56346	0.369579	0.489447	0.256441	0.277593	4.27288	0.348265
PcyM_0204200	12.4874	1.26585	21.9882	0.269659	0.417546	0.116832	0.0910728	11.9138	0.223778
PcyM_0204400	1.31523	1.76779	0.255515	0.267919	0.971544	0.566009	0.241723	1.11284	0.511799
PcyM_0204500	190.874	207.149	118.733	4.13114	13.4825	1.0256	0.361719	172.252	4.75025	PVX_081205, TatD-like deoxyribonuclease, putative
PcyM_0204600	94.3378	69.9896	69.2803	0.0470971	0.41905	3.24875	0.0291137	77.8692	0.936003	PVX_081210, hypothetical protein, conserved
PcyM_0204700	39.2941	27.5398	45.2111	12.1789	0.961471	1.5691	1.02688	37.3483	3.9341	PVX_081215, hypothetical protein, conserved
PcyM_0204800	31.0644	16.5063	11.2448	17.6216	1.09726	5.38512	0.489958	19.6052	6.14848	PVX_081220, hypothetical protein, conserved
PcyM_0204900	590.236	315.915	300.772	71.4494	18.2633	38.3001	27.9741	402.308	38.9967
PcyM_0205000	2.97075	4.9896	1.5801	0.0033741	0.504449	0.451292	1.22938	3.18015	0.547123	PVX_081230, UMP-CMP kinase, putative
PcyM_0205100	5.39317	16.2363	10.2887	0.123904	0.499488	0.701806	0.30084	10.6394	0.40651	PVX_081235, hypothetical protein, conserved
PcyM_0205200	29.5793	22.4159	0.0404116	0.0630085	0.100215	0.312064	0.437222	17.3452	0.228127
PcyM_0205300	13.7776	17.6745	15.3233	1.14178	0.191152	0.143468	2.19824	15.5918	0.918658	PVX_081240, replication factor c, putative
PcyM_0205400	36.767	15.5572	2.70207	0.102433	0.212689	0.0214013	14.9788	18.3421	3.82884
PcyM_0205500	34.8583	3.84202	5.90708	0.894813	1.62029	1.43855	0.582212	14.8691	1.13397	PVX_081245, hypothetical protein, conserved
PcyM_0205600	0.00773152	1.8474	0.0045281	0.00414896	0.0598571	0.0330063	0.00553409	0.619885	0.0256366
PcyM_0205700	22.2243	2.73937	17.8522	0.221261	1.43984	0.212307	0.245425	14.2719	0.529709	PVX_081255, adenylate kinase-like protein 1, putative (AKLP1)
PcyM_0205800	54.1025	35.2251	89.8058	5.52959	2.85076	2.37682	0.989713	59.7112	2.93672	PVX_081260, transcription initiation factor TFIIB, putative
PcyM_0205900	23.7527	1.88267	0.902129	0.138435	0.197216	0.443914	0.514696	8.84584	0.323565
PcyM_0206000	1.51671	3.20041	0.0685108	1.65807	0.171616	0.296423	0.225853	1.59521	0.587991	PVX_081265, chromatin assembly factor 1 protein WD40 domain, putative
PcyM_0206100	16.3298	36.8544	28.7203	0.221182	0.866968	0.0441166	3.09587	27.3015	1.05703	PVX_081270, phosphatidylinositol-4-phosphate 5-kinase, putative (PIP5K)
PcyM_0206200	41.962	140.225	48.2729	30.3887	5.67422	88.6443	0.0100486	76.8201	31.1793
PcyM_0206300	3.4299	3.05536	45.3662	0.288972	0.0119539	0.0311686	0.00174642	17.2838	0.0834602	PVX_081275, bromodomain protein, putative
PcyM_0206400	79.3836	62.101	77.8313	5.69446	5.41776	10.8859	4.33409	73.1053	6.58306	PVX_081277, DNA-directed RNA polymerase 2, putative; PVX_136260, unspecified product
PcyM_0206500	46.2553	27.9194	70.2747	0.647987	2.92717	0.381575	0.547401	48.1498	1.12603	PVX_081280, FAD-linked sulfhydryl oxidase ERV1, putative (ERV1)
PcyM_0206600	12.272	11.6012	45.9111	0.183041	0.193336	0.0710366	0.525712	23.2614	0.243282	PVX_081285, selenocysteine-specific elongation factor selB homologue, putative
PcyM_0206700	9.40025	10.9463	0.289752	4.62714	0.0866828	0.0676684	0.0803773	6.87878	1.21547	PVX_081290, hypothetical protein
PcyM_0206800	35.9141	138.202	1.78416	1.79264	0.0183804	1.10555	0.0131295	58.6333	0.732426	PVX_081295, unspecified product
PcyM_0206900	84.6917	80.8475	12.8666	0.833734	2.02112	7.71099	1.78569	59.4686	3.08788
PcyM_0207000	55.8492	71.5654	0.635915	0.852553	1.20704	13.2193	0.576245	42.6835	3.9638
PcyM_0207100	9.26428	157.629	0.417812	0.213439	0.306841	15.2786	0.296751	55.7702	4.0239
PcyM_0207200	13.7791	21.3554	3.71748	1.92603	3.86101	2.82674	1.50659	12.9507	2.53009
PcyM_0207300	22.5298	7.08073	0.381672	0.109258	0.217531	0.188808	1.24485	9.99741	0.440111
PcyM_0207400	35.7169	26.5678	1.54513	0.0385117	0.811561	0.0647455	0.0912676	21.2766	0.251521	PVX_081300, phenylalanine--tRNA ligase alpha subunit, putative
PcyM_0207500	0.197928	0.424325	0.325015	0.0834221	0.108028	0.0317179	0.0405066	0.315756	0.0659187
PcyM_0207600	54.0098	28.4441	2.38908	0.138652	0.519863	0.162436	0.0691505	28.281	0.222526
PcyM_0207700	66.6893	75.4993	17.6498	9.54007	1.38569	0.367154	0.283449	53.2795	2.89409	PVX_081310, N-acetyltransferase, putative
PcyM_0207800	0.954295	1.42085	0.276768	0.128477	0.294721	0.140685	0.200855	0.883971	0.191184
PcyM_0207900	0.228616	10.1449	1.00435	0.0523952	0.223587	0.195432	0.00634515	3.79263	0.11944
PcyM_0208000	46.6388	29.6411	69.8488	0.400538	0.790431	1.59276	0.806873	48.7096	0.89765
PcyM_0208100	1.63625	1.59991	22.6088	1.26668	0.155343	0.202643	0.138804	8.61499	0.440867	PVX_081330, LCCL domain-containing protein (CCp5)
PcyM_0208200	1.57538	2.59027	0.256321	0.26797	1.13327	0.792726	0.785411	1.47399	0.744844	PVX_081335, hypothetical protein, conserved
PcyM_0208300	50.0958	29.4619	46.6918	16.8264	0.320598	0.153615	4.60562	42.0832	5.47655
PcyM_0208400	105.537	147.513	128.888	4.11317	0.253581	0.168422	25.1477	127.313	7.42073	PVX_081340, hypothetical protein, conserved
PcyM_0208500	0.273844	0.493424	0.0660078	0.194806	0.00663146	0.00233812	0.0024932	0.277759	0.0515673
PcyM_0208600	13.9744	1.10714	24.3242	0.0203661	0.0596639	0.186267	0.89798	13.1352	0.291069	PVX_081350, hypothetical protein, conserved
PcyM_0208700	1683.72	1562.68	1787.69	83.8729	55.4337	55.8754	118.837	1678.03	78.5048	PVX_081355, hypothetical protein
PcyM_0208800	111.004	81.4198	99.1361	12.6121	1.09057	2.15112	0.125912	97.1867	3.99493	PVX_081360, hypothetical protein, conserved
PcyM_0208900	9.35355	9.525	23.4577	0.986248	0.630738	0.56767	0.191739	14.1121	0.594099	PVX_081365, hypothetical protein, conserved
PcyM_0209000	7.8904	1.51751	1.75503	0.402119	0.0218312	0.0627237	0.132912	3.72098	0.154896	PVX_081370, hypothetical protein, conserved
PcyM_0209100	960.266	930.244	1357.22	34.4012	20.3072	70.099	31.2397	1082.58	39.0117	PVX_081375, proteasome subunit beta type-3, putative
PcyM_0209200	403.08	510.02	774.468	1.8386	14.8318	0.126789	0.0678791	562.523	4.21627	PVX_081380, hypothetical protein, conserved
PcyM_0209300	58.7596	51.8049	19.5287	10.4907	4.92338	5.67124	4.9113	43.3644	6.49914	PVX_081385, double-strand break repair protein MRE11, putative
PcyM_0209400	12.6117	50.4731	25.6079	0.0130376	0.888066	0.230099	0.118584	29.5642	0.312447	PVX_081390, hypothetical protein, conserved
PcyM_0209500	17.4174	15.8463	6.95408	0.203573	1.09241	0.8528	0.19977	13.4059	0.587138
PcyM_0209600	2.79493	6.48058	0.0551693	0.560167	0.954389	0.0742928	0.0621615	3.11023	0.412753	PVX_081400, patched family protein, putative
PcyM_0209700	1.67168	36.8478	1.18699	0.0640249	0.181644	0.123534	0.0537502	13.2355	0.105738	PVX_081405, hypothetical protein, conserved
PcyM_0209800	64.551	56.5023	4.49886	1.9733	2.82346	1.72486	0.921702	41.8507	1.86083	PVX_081410, carbon catabolite repressor protein 4, putative
PcyM_0209900	3.90342	1.40041	0.191894	0.125899	0.176122	0.125334	0.220873	1.83191	0.162057
PcyM_0210000	261.507	325.956	701.829	4.53747	8.29235	8.6851	0.478955	429.764	5.49847	PVX_081415, hypothetical protein, conserved
PcyM_0210100	60.9964	9.86552	20.2357	0.504045	0.5772	0.240008	0.0419566	30.3659	0.340802
PcyM_0210200	588.428	255.581	944.707	66.477	7.53148	4.66493	113.573	596.238	48.0616
PcyM_0210300	12.6394	2.76422	43.4253	0.697738	0.0433909	10.8256	0.0870653	19.6096	2.91345	PVX_081425, 2-C-methyl-D-erythritol 4-phosphate cytidylyltransferase, putative (IspD)
PcyM_0210400	104.852	123.05	147.935	0.25981	4.68191	10.288	0.0930922	125.279	3.83069
PcyM_0210500	86.1897	28.6391	158.882	0.27088	0.416633	3.98562	0.123902	91.237	1.19926
PcyM_0210600	10.0911	13.6936	8.63454	2.70141	5.6746	2.4763	1.07222	10.8064	2.98113
PcyM_0210700	31.528	39.422	0.431451	0.108744	0.898963	7.67839	0.183539	23.7938	2.21741
PcyM_0210800	147.188	106.945	215.552	5.66822	14.8326	9.54868	27.0559	156.562	14.2764
PcyM_0210900	5.14231	4.24655	1.4949	0.157898	0.491755	0.104226	0.134346	3.62792	0.222056
PcyM_0211000	21.3062	22.9705	49.8237	1.91838	0.205829	0.00893946	0.00319799	31.3668	0.534086	PVX_081440, hypothetical protein, conserved
PcyM_0211100	0.386108	1.48416	0.00273154	0.00604516	0.00241101	0.0262599	0.050717	0.624333	0.0213583
PcyM_0211200	74.2013	99.3005	216.063	3.39993	1.30821	0.14896	4.42536	129.855	2.32061	PVX_081450, pre-rRNA-processing protein TSR2, putative
PcyM_0211300	4.05298	4.88129	5.20214	0.0427159	0.0339241	0.0528464	0.0586664	4.71214	0.0470382	PVX_081455, calcium-transporting ATPase, putative
PcyM_0211400	54.0011	44.9795	54.2783	2.02161	0.204565	0.0300384	12.0558	51.0863	3.578	PVX_081460, hypothetical protein, conserved
PcyM_0211500	22.6129	28.02	57.3973	0.00492439	1.5657	0.113564	0.00261137	36.0101	0.421699	PVX_081465, vacuolar ATP synthase subunit c, putative
PcyM_0211600	59.4714	27.8895	2.52221	12.0799	0.709946	1.5238	31.9002	29.9611	11.5535	PVX_081470, hypothetical protein, conserved
PcyM_0211700	17.7094	14.9908	18.015	0.22025	0.751932	2.24884	0.028801	16.9051	0.812456	PVX_081475, DNA binding protein, putative
PcyM_0211800	2.51855	0.447619	0.00243161	0.953971	0.028869	0.0403306	0.0493471	0.989534	0.268129	PVX_081480, hypothetical protein, conserved
PcyM_0211900	5.27609	6.58747	0.288047	0.00934989	0.00611279	0.00911725	0.0412421	4.05054	0.0164555
PcyM_0212000	1.74867	10.8477	0.0573339	0.0442276	0.074142	0.0869861	0.108501	4.2179	0.0784642
PcyM_0212100	21.0734	9.89142	5.25423	0.351248	0.626254	0.316381	6.55622	12.073	1.96253	PVX_081490, hypothetical protein, conserved
PcyM_0212200	82.5599	23.7063	46.8979	0.689678	4.71217	1.27978	6.37688	51.0547	3.26463	PVX_081495, hypothetical protein, conserved
PcyM_0212300	7.18625	34.6639	8.23457	0.224054	0.796212	0.265218	11.0492	16.6949	3.08367
PcyM_0212400	28.5938	20.3656	49.0523	57.5903	0.28395	0.593416	0.0751953	32.6706	14.6357	PVX_081502, hypothetical protein, conserved
PcyM_0212500	9.25868	13.8529	4.08458	0.00336344	0.0252543	0.00142411	0.098824	9.06537	0.0322165	PVX_081505, hypothetical protein, conserved
PcyM_0212600	267.345	260.984	463.723	24.9445	2.24515	36.2283	29.3173	330.684	23.1838	PVX_081510, hypothetical protein, conserved
PcyM_0212700	22.3897	68.099	43.9005	0.184935	0.407787	0.232231	0.0556625	44.7964	0.220154
PcyM_0212800	9.78782	7.94003	11.1106	0.274055	6.88205	0.870093	0.178233	9.61283	2.05111	PVX_081515, transporter, putative
PcyM_0212900	8.93717	4.38943	0.457321	0.531972	2.64155	0.154177	0.678415	4.59464	1.00153
PcyM_0213000	82.601	44.2329	255.095	4.08925	0.706849	70.1997	0.066617	127.31	18.7656	PVX_081520, transporter, putative
PcyM_0213100	523.121	338.531	433.586	34.6603	37.7766	92.3587	2.76885	431.746	41.8911
PcyM_0213200	41.2135	13.7555	13.466	15.1809	3.40682	1.90715	0.0677905	22.8117	5.14066	PVX_081525, hypothetical protein, conserved
PcyM_0213300	16.068	7.30893	4.78878	0.00476263	0.330154	0.0384561	0.108796	9.38855	0.120542	PVX_081530, hypothetical protein, conserved
PcyM_0213400	433.092	386.311	449.082	11.4719	7.06504	22.3789	26.6374	422.828	16.8883	PVX_081535, 4-hydroxy-3-methylbut-2-enyl diphosphate reductase, putative
PcyM_0213500	7.32635	53.6636	4.03001	0.369035	68.9401	0.124296	1.66434	21.6733	17.7744
PcyM_0213600	16.7023	8.79805	18.0543	2.325	0.514574	0.147886	1.79015	14.5182	1.1944
PcyM_0213700	0.772335	0.457224	0.175133	0.106145	0.294686	0.446363	0.344514	0.468231	0.297927	PVX_081550, StAR-related lipid transfer protein, putative
PcyM_0213800	11.1466	0.268943	0.994878	0.0358209	0.0398895	0.0702968	0.00297541	4.13682	0.0372456	PVX_081555, hypothetical protein, conserved
PcyM_0213900	227.407	92.4833	403.127	9.57301	22.8272	41.95	10.2335	241.006	21.1459	PVX_081560, hypothetical protein, conserved
PcyM_0214000	1.8754	10.5236	7.76766	0.0371621	1.7826	0.016741	0.0257171	6.72223	0.465555	PVX_081565, hypothetical protein, conserved
PcyM_0214100	26.1776	21.8419	34.1656	0.358489	0.980117	0.264966	0.591037	27.395	0.548652	PVX_081570, actin-related protein (ARP1)
PcyM_0214200	19.107	27.6469	9.37572	0.737589	0.128362	0.0680362	0.634417	18.7098	0.392101	PVX_081572, L-seryl-tRNA(Sec) kinase, putative (PSTK)
PcyM_0214300	3.77855	4.77421	64.5601	0.854845	1.7558	13.2931	0.0274093	24.371	3.98279	PVX_081575, hypothetical protein, conserved
PcyM_0214400	186.05	137.68	172.563	33.9793	0.0803292	0.216846	0.0588136	165.431	8.58382	PVX_081580, hypothetical protein, conserved
PcyM_0214500	17.3386	5.21733	1.84044	3.49321	0.365216	0.306209	2.42388	8.13211	1.64713	PVX_081585, hypothetical protein, conserved
PcyM_0214600	0.234668	1.15416	0.691798	0.242972	0.252441	0.117424	0.0155381	0.693542	0.157094
PcyM_0214700	0.0561244	5.53399	151.226	0.142907	0.246855	0.0952243	0.137715	52.2721	0.155675
PcyM_0214800	24.9242	19.0933	104.323	3.99109	0.00671095	0.0428398	0.0533115	49.4469	1.02349	PVX_081590, hypothetical protein, conserved
PcyM_0214900	424.28	405.648	344.227	4.9635	5.20445	3.39175	2.07205	391.385	3.90794	PVX_081595, nucleoside transporter 4 (NT4)
PcyM_0215000	88.6985	86.0439	179.845	4.52752	1.09356	0.0946136	4.87161	118.196	2.64682	PVX_081600, vacuolar protein sorting-associated protein 51, putative (VPS51)
PcyM_0215100	46.1752	50.4651	0.274659	13.9337	0.144466	0.311126	0.0303217	32.305	3.6049	PVX_081605, vacuolar protein sorting-associated protein VTA1, putative
PcyM_0215200	4.87414	6.01976	3.72397	0.417542	0.138209	0.111873	0.077737	4.87262	0.18634	PVX_081610, aspartate--tRNA ligase, putative
PcyM_0215300	162.036	173.321	442.628	15.7383	7.14635	37.7141	13.6558	259.328	18.5636	PVX_081615, hypothetical protein, conserved
PcyM_0215400	111.175	148.445	154.431	8.96154	12.3797	3.03705	5.35835	138.017	7.43415	PVX_081620, DNA mismatch repair protein PMS1, putative (PMS1)
PcyM_0215500	26.7721	31.2632	20.7164	1.88018	0.943835	0.944024	2.79685	26.2506	1.64122
PcyM_0215600	204.045	210.201	318.729	21.8047	14.5822	1.0896	39.0016	244.325	19.1195	PVX_081630, ubiquitin carboxyl-terminal hydrolase family 2, putative
PcyM_0215700	37.1949	28.0377	19.7014	0.100995	0.0717554	0.262859	6.67564	28.3113	1.77781	PVX_081635, hypothetical protein, conserved
PcyM_0215800	12.0259	6.96841	22.2502	0.910229	0.0737077	0.228476	0.415491	13.7482	0.406976	PVX_081640, hypothetical protein, conserved
PcyM_0215900	0.978609	1.20692	2.10489	0.0558416	0.111924	0.0940061	0.419564	1.43014	0.170334
PcyM_0216000	24.6601	5.5655	16.6829	0.415203	0.507726	0.0762723	0.0890141	15.6362	0.272054	PVX_081650, mitochondrial import inner membrane translocase subunit TIM50, putative (TIM50)
PcyM_0216100	292.273	247.329	459.59	8.77511	16.8839	12.1529	12.2293	333.064	12.5103
PcyM_0216200	7.05235	9.5654	17.4165	0.0142018	0.0863979	0.00216644	0.926317	11.3448	0.257271	PVX_081655, vacuolar protein sorting-associated protein 53, putative (VPS53)
PcyM_0216300	1.17292	8.40046	17.7111	0.132704	0.43226	0.986892	0.790871	9.09483	0.585682	PVX_081660, hypothetical protein, conserved
PcyM_0216400	71.2237	129.196	95.7497	5.18514	0.365787	0.0812856	82.7966	98.7231	22.1072	PVX_081665, cysteine desulfurase, putative
PcyM_0216500	16.9363	13.4625	0.56663	0.141058	0.308971	0.565483	0.0390771	10.3218	0.263647	PVX_081670, DNA (cytosine-5)-methyltransferase, putative (DNMT)
PcyM_0216600	64.3806	82.7806	171.316	3.75964	15.5984	9.95101	0.757767	106.159	7.51671	PVX_081675, proteasome subunit alpha type-5, putative
PcyM_0216700	8.26843	14.5867	0.917004	1.62402	0.102749	0.0104794	1.41288	7.92403	0.787533	PVX_081680, hypothetical protein, conserved
PcyM_0216800	91.8983	52.6396	110.432	2.66285	1.28186	14.352	2.91492	84.99	5.3029	PVX_081685, hypothetical protein, conserved
PcyM_0216900	270.406	371.232	123.364	1.66517	6.36493	44.7117	0.837646	255	13.3949	PVX_081690, hypothetical protein, conserved
PcyM_0217000	78.1986	81.5285	317.176	1.12116	1.22955	0.859932	22.2967	158.968	6.37683	PVX_081695, cation transporting ATPase, putative
PcyM_0217100	0.694181	13.681	0.852993	0.119858	0.103731	0.0799682	0.0868973	5.07606	0.0976135	PVX_081700, hypothetical protein, conserved
PcyM_0217200	3.61231	1.00076	3.28757	0.0287847	0.0255113	0.111071	0.0113034	2.63355	0.0441677	PVX_081705, eukaryotic translation initiation factor 2 alpha subunit, putative
PcyM_0217300	19.9761	43.8397	58.8209	0.0912576	3.44662	0.0105797	13.8991	40.8789	4.36189	PVX_081707, conserved Plasmodium protein, unknown function
PcyM_0217400	375.448	333.044	441.238	12.5774	18.6095	3.90615	67.5111	383.243	25.6511	PVX_081710, actin-like protein, putative (ALP3)
PcyM_0217500	30.2442	29.89	53.6894	1.23831	0.124691	0.00929226	0.0188074	37.9412	0.347776	PVX_081715, hypothetical protein, conserved
PcyM_0217600	14.8307	10.5835	43.2367	1.62084	1.51745	2.18771	8.22819	22.8836	3.38855	PVX_081720, hypothetical protein, conserved
PcyM_0217700	12.3918	1.85552	7.03352	0.128766	0.165426	4.78855	3.21733	7.09362	2.07502	PVX_081722, conserved Plasmodium protein, unknown function
PcyM_0217800	142.226	146.907	151.842	13.0231	7.42255	4.61595	10.2372	146.992	8.82469	PVX_081725, hypothetical protein, conserved
PcyM_0217900	3.24309	0.180839	0.0319553	0.482966	0.0696098	0.0682612	0.123649	1.15196	0.186121	PVX_081730, alpha/beta hydrolase, putative
PcyM_0218000	347.794	340.285	441.698	1.65557	32.5165	46.5547	0.829584	376.592	20.3891	PVX_081740, hypothetical protein, conserved
PcyM_0218100	109.046	145.886	17.954	12.6302	3.13786	0.311262	0.08433	90.9622	4.04092	PVX_081745, RNA-binding protein, putative
PcyM_0218200	252.313	203.603	224.636	6.1466	6.3106	5.17778	14.7281	226.85	8.09076	PVX_081750, signal recognition particle subunit SRP9, putative (SRP9)
PcyM_0218300	11.86	15.9888	60.4511	0.00533661	0.00199315	0.0640796	0.26204	29.4333	0.0833625	PVX_081755, hypothetical protein, conserved
PcyM_0218400	68.777	52.5973	4.37912	1.36181	3.30406	0.515433	0.384029	41.9178	1.39133	PVX_081760, peroxiredoxin, putative (AOP)
PcyM_0218500	0.872903	0.0875204	9.85602	0.0205382	1.96399	0.00146867	0.0140393	3.60548	0.500009
PcyM_0218600	31.4567	34.0788	237.349	2.34476	0.244794	1.26476	1.48883	100.961	1.33579	PVX_081770, hypothetical protein, conserved
PcyM_0218700	35.4228	32.1837	48.9559	1.08773	0.0839652	5.24523	12.6062	38.8541	4.75579	PVX_081775, hypothetical protein, conserved
PcyM_0218800	123.047	74.3891	342.615	1.4505	5.25709	1.92313	1.17917	180.017	2.45248	PVX_081780, hypothetical protein, conserved
PcyM_0218900	117.146	117.078	344.189	4.62478	5.43268	31.1868	18.6354	192.805	14.9699	PVX_081785, hypothetical protein, conserved
PcyM_0219000	66.223	53.8725	79.4406	0.462868	0.844767	0.361649	0.382518	66.5121	0.51295	PVX_081790, hypothetical protein, conserved
PcyM_0219100	256.624	280.342	385.549	0.0509535	1.34021	1.11279	31.7113	307.505	8.55381	PVX_081792, hypothetical protein
PcyM_0219200	18.1956	3.04497	2.65108	0.13156	10.5778	0.0949083	0.287157	7.9639	2.77286	PVX_081795, hypothetical protein, conserved
PcyM_0219300	0.319926	0.62177	0	0.0142387	0.137676	0.00604309	0.00069913	0.313899	0.0396641
PcyM_0219400	36.6855	16.5051	49.8473	0.301204	0.936244	10.0832	14.6046	34.346	6.48129	PVX_081805, AP-4 complex subunit beta, putative
PcyM_0219500	4.3141	11.193	0.984709	0.380415	0.402002	0.0930789	0.419489	5.49728	0.323746	PVX_081810, transcription factor with AP2 domain(s), putative (AP2-L)
PcyM_0219600	4.39117	0.656748	0.439955	0.23891	0.239239	0.483368	0.249473	1.82929	0.302748	PVX_081815, hypothetical protein, conserved
PcyM_0219700	77.0384	192.401	181.483	7.63859	1.11941	4.71057	0.270239	150.307	3.4347	PVX_081820, hypothetical protein, conserved
PcyM_0219800	12.4403	6.84321	0.595492	0.631426	0.961401	0.237359	0.677991	6.62634	0.627044
PcyM_0219900	7.14848	15.4972	2.58659	10.9215	5.3481	2.40808	0.929057	8.41074	4.90169
PcyM_0220000	3.03996	4.04261	1.03652	5.09385	3.65574	2.36966	0.16157	2.70636	2.8202
PcyM_0220100	0.0812072	0.468724	0.0243532	0.0235735	0.0373379	0.00721938	0.363927	0.191428	0.108014
PcyM_0220200	0.0412316	0.213581	0.046792	0.0581492	0.0613926	0.0375321	0.0843896	0.100535	0.0603659	PVX_081825, hypothetical protein
PcyM_0220300	0.0583581	0.15281	0.00709408	0.0778888	0.102872	0.235979	0.15478	0.0727541	0.14288	PVX_081830, Plasmodium exported protein, unknown function
PcyM_0220400	0.00219101	0.00957161	0.00597807	0.0179648	0.0206289	0.016432	0.0191555	0.00591356	0.0185453	PVX_081832, Plasmodium exported protein, unknown function
PcyM_0220500	0.165277	0.140067	0.177244	0.0486178	0.0830101	0	0.0965073	0.160863	0.0570338	PVX_081835, knob-associated histidine-rich protein, putative
PcyM_0220600	0.0913698	0.713519	0.0465973	0.105975	0.0780218	0.0808202	0.172921	0.283829	0.109435
PcyM_0220700	0.00424328	0.0402979	0.0142479	0.0048381	0.0071381	0.0425471	0.00575125	0.0195964	0.0150686
PcyM_0220800	0.179616	0.377826	0.0199651	0.0381964	0.0887859	0.500226	0.0285808	0.192469	0.163947
PcyM_0220900	0.0967781	0.167472	0.129415	0.0405457	0.0414062	0.0907924	0.0264263	0.131222	0.0497927	PVX_081847, Plasmodium exported protein, unknown function
PcyM_0221000	0.0141163	0.0683576	0.0202344	0.0142101	0.0193879	0.150595	0.00797694	0.0342361	0.0480424
PcyM_0221100	0.177126	0.503884	0.529777	0.317813	0.270812	0.116434	0.511713	0.403596	0.304193	PVX_078695, unspecified product
PcyM_0221200	0	0.471378	0.00631014	0.0155545	0.0120575	0	0.00472661	0.159229	0.00808466
PcyM_0221300	20.0174	13.1222	4.68264	11.4374	4.00946	0.492409	0.566104	12.6074	4.12634
PcyM_0221400	4.01528	0.394788	0.109976	3.63928	0.242401	0.0433134	0.0674578	1.50668	0.998113
PcyM_0221500	5.13504	1.77214	0.452896	0.432243	0.719568	0.177132	0.199424	2.45336	0.382092
PcyM_0221600	0.0185813	0.0478338	0.0133925	0.0134262	0.015104	0.00107388	0.00801976	0.0266026	0.00940596
PcyM_0221700	0.073333	0.206473	0.0272645	0.0360498	0.105729	0.012555	0.0169794	0.102357	0.0428283
PcyM_0221800	0.115888	0.304497	0.0344962	0.060072	0.160706	0.0249898	0.0309237	0.151627	0.069173
PcyM_0221900	0.0853757	0.305343	0.148687	0.0724344	0.0793042	0.0107205	0.0510256	0.179802	0.0533712
PcyM_0222000	2.60249	7.25038	4.59272	1.17206	0.732209	0.417615	1.03324	4.8152	0.83878
PcyM_0222100	0.196977	1.47809	0.14179	0.100622	0.0923945	0.0626336	0.0434532	0.605617	0.0747759
PcyM_0222200	0.437113	1.41411	1.28384	0.830364	0.694958	0.271518	1.28828	1.04502	0.771279	PVX_078695, unspecified product
PcyM_0222300	29.2887	9.71595	0.875759	0.266346	0.553319	0.139411	0.649656	13.2935	0.402183
PcyM_0222400	0.431723	3.39265	0.122548	0.257872	0.846474	0	0.0713913	1.31564	0.293934
PcyM_0222500	0.178151	1.74629	0.163299	0.103168	0.145326	0.12769	0.0475584	0.695913	0.105935
PcyM_0222600	8.1314	0.770854	0.0447006	0.0867706	0.691916	0.131295	0.0720526	2.98232	0.245509
PcyM_0222700	0.804517	4.91179	1.39609	0.446827	1.50225	0.169268	0.567414	2.3708	0.67144
PcyM_0222800	1.66758	2.53159	3.37916	0.313831	0.278435	0.380368	0.667008	2.52611	0.409911
PcyM_0300100	1.28048	0.17723	0.17741	0.031363	0.0832135	0.107853	0.0598514	0.54504	0.0705701
PcyM_0300200	1.08768	3.81348	1.12217	0.285049	0.618245	0.436641	0.209463	2.00778	0.38735
PcyM_0300300	0.125352	0.0486557	0.0949164	0.0359772	0.0395017	0.00842314	0.0952485	0.0896415	0.0447876	PVX_060690, unspecified product
PcyM_0300400	0.239052	1.44455	0.412757	0.505353	0.372142	0.323575	0.0186196	0.698786	0.304922
PcyM_0300500	0.913967	0.965511	0.256083	0.216256	0.194598	0.0825305	2.42176	0.711854	0.728787
PcyM_0300600	0.205192	0.663524	0.17855	0.208519	0.310604	0.0883551	0.137566	0.349089	0.186261
PcyM_0300700	0.0244232	0.233907	0.0880276	0.0261971	0.0220914	0.00466527	0.0443911	0.115453	0.0243362
PcyM_0300800	1.49178	1.91509	0.317589	0.477825	0.650191	1.42389	0.836922	1.24148	0.847207
PcyM_0300900	0.79872	1.58742	0.40212	0.334093	0.298272	0.219626	0.40169	0.92942	0.31342
PcyM_0301000	2.30824	3.30814	0.257298	7.18625	4.25416	0.385975	0.834146	1.95789	3.16513	PVX_001610, variable surface protein Vir25-related
PcyM_0301100	1.12141	2.54913	1.55553	0.145309	0.268661	0.0449338	0.0968789	1.74202	0.138946
PcyM_0301200	0.463372	0.958725	0.135405	0.264742	0.340083	0.102853	0.0655118	0.519167	0.193297
PcyM_0301300	1.37655	5.41404	1.42382	1.19072	1.32287	0.60042	1.71765	2.73814	1.20792
PcyM_0301400	0.022482	0.118049	0.037282	0.0128332	0.0178273	0.0047803	0.0188848	0.059271	0.0135814
PcyM_0301500	0.0913294	0.293132	0.256724	0.117579	0.109504	0	0.0541179	0.213729	0.0703003
PcyM_0301600	0.307403	0.686048	0.238577	0.180876	0.165382	0.355988	0.86496	0.410676	0.391802
PcyM_0301700	1.86425	2.91754	0.684645	0.571655	1.02629	1.65484	0.577096	1.82215	0.95747	PVX_004520, variable surface protein Vir4, putative; PVX_096000, variable surface protein Vir4, putative
PcyM_0301800	0.659495	1.34835	0.237633	0.166155	0.524386	0.187392	0.567963	0.748494	0.361474
PcyM_0301900	0.526102	0.688782	0.386742	0.152168	0.34681	0.225604	0.544576	0.533875	0.317289
PcyM_0302000	0.222218	1.68641	2.51189	0.918975	0.427634	0.731337	2.49887	1.47351	1.1442
PcyM_0302100	0.344482	1.48126	0.674276	0.206045	0.804304	0.60173	1.31773	0.833339	0.732452	PVX_039190, unspecified product
PcyM_0302200	1.58815	4.27094	1.46777	0.822279	1.06646	0.262227	0.202393	2.44229	0.588339
PcyM_0302300	0.301231	0.698545	0.358546	0.0841224	0.232409	0.187312	0.22828	0.452774	0.183031
PcyM_0302400	0.673843	0.07363	0.00691145	0.0125363	0.0671032	0.0582382	0.00549159	0.251461	0.0358423
PcyM_0302500	0.129612	0.177205	0.0350097	0.0255542	0.0572636	0.0565211	0.221153	0.113942	0.090123
PcyM_0302600	8.32242	0.345961	0.0820733	0.0544041	0.158465	0.0132852	0.135263	2.91682	0.0903543
PcyM_0302700	6.91623	0.91969	0.11488	0.141255	0.180886	0.131795	0.0538252	2.65027	0.12694
PcyM_0302800	1.15228	2.65881	1.5537	0.474997	0.694183	0.261593	1.44331	1.78826	0.718521
PcyM_0302900	19.0568	2.5243	0.277164	0.337207	0.644702	0.0741943	0.30991	7.2861	0.341504
PcyM_0303000	0.256695	1.69465	0.24686	0.717032	0.261017	1.55921	0.454541	0.732735	0.747951
PcyM_0303100	0.0894992	0.148501	0.0214714	0.066339	0.0603548	0.00519623	0.0168217	0.0864906	0.0371779
PcyM_0303200	0.0434072	0.0485533	0.0326685	0.0136385	0.0394839	0.00433241	0.0148004	0.041543	0.0180638
PcyM_0303300	0.0705665	0.110776	0.0147215	0.0297873	0.0542509	0.00321783	0.0949433	0.0653548	0.0455498
PcyM_0303400	0.0241624	0.0440119	0.00643666	0.00846584	0.0198174	0.0635296	0.00313013	0.0248703	0.0237358
PcyM_0303500	0.413403	0.253845	0.0403973	0.0462913	0.154077	0.0372882	0.0544771	0.235882	0.0730333
PcyM_0303600	0.0711171	0.0451684	0.00475155	0.161057	0.366924	0.947032	0.529717	0.0403457	0.501183	PVX_000010, Plasmodium exported protein, unknown function
PcyM_0303700	0.596837	0.748979	0.0941159	0.228648	0.39191	0.339577	0.268416	0.479977	0.307138	PVX_000005, Plasmodium exported protein, unknown function
PcyM_0303800	0.107978	0.935772	0.122807	0.107468	0.0661345	0.0732002	0.0780865	0.388852	0.0812222
PcyM_0303900	2.5336	8.07661	2.82269	5.91225	1.07906	0.417177	1.76155	4.47763	2.29251	PVX_110295, variable surface protein Vir22-like; PVX_115490, VIR protein
PcyM_0304000	0.0864398	0.0851821	0.0261406	0.0142273	0.0251082	0.0111176	0.0108558	0.0659208	0.0153272
PcyM_0304100	0.260038	0.781325	0.149854	0.389044	0.172251	0.194851	0.203313	0.397072	0.239865
PcyM_0304200	1.04922	2.45733	0.239313	0.35054	1.34784	0.234033	0.451719	1.24862	0.596034
PcyM_0304300	7.7813	8.84456	0.309435	1.5054	3.59313	1.37987	1.14322	5.6451	1.9054	PVX_001110, hypothetical protein
PcyM_0304400	0.943097	1.55351	0.316417	0.258509	0.928268	0.513505	0.380021	0.937674	0.520076
PcyM_0304500	1.47135	15.0169	1.17355	0.504406	1.2551	0.307187	0.684328	5.88725	0.687755
PcyM_0304600	5.11835	0.324164	3.1526	1.27046	0.0820183	0.104633	0.003038	2.86504	0.365037	PVX_001100, RAD protein (Pv-fam-e)
PcyM_0304700	3.12967	6.21974	13.8485	3.32398	3.13481	4.77053	3.15766	7.73263	3.59674
PcyM_0304800	73.0523	48.5236	290.357	7.6812	2.74621	0.799381	8.28039	137.311	4.8768	PVX_001095, hypothetical protein, conserved
PcyM_0304900	34.0935	20.9296	48.2564	0.950796	5.03555	4.6909	1.2592	34.4265	2.98411	PVX_001090, hypothetical protein, conserved
PcyM_0305000	50.9297	50.7169	203.113	14.5744	29.3353	18.7143	0.107014	101.586	15.6828	PVX_001085, hypothetical protein, conserved
PcyM_0305100	10.1071	32.2593	0.249451	0.0186911	0.291551	9.15733	0.00116626	14.2053	2.36719	PVX_001080, hypothetical protein, conserved
PcyM_0305200	3.11246	0.164804	0.00941998	0.110358	0.182602	0.104449	0.00644984	1.09556	0.100965	PVX_001075, ubiquitin specific protease, putative
PcyM_0305300	7.46858	0.339863	0.0226465	0.0415595	0.0397429	0.0132751	0.01158	2.61036	0.0265394
PcyM_0305400	4.48905	0.0109298	0.335881	0.014945	0.661502	0.00170472	0.00222936	1.61195	0.170095
PcyM_0305500	1.20128	3.91511	6.56062	0.0135056	0.0440529	0.0159014	0.073324	3.89234	0.036696	PVX_001060, splicing factor, putative
PcyM_0305600	0.366547	0.0306983	0.0115089	0.0132918	0.0642011	0.045232	0.0626591	0.136251	0.046346	PVX_001055, alpha/beta hydrolase, putative
PcyM_0305700	98.7569	101.288	83.7036	12.7567	11.1616	2.70823	0.0906539	94.583	6.67929	PVX_001050, SET domain protein, putative (SET8)
PcyM_0305800	0.643077	1.29007	3.37947	0.0519845	0.115554	0.0672884	0.087008	1.77087	0.0804587
PcyM_0305900	11.8268	8.46443	48.1289	6.67957	0.0916447	0.409082	7.11475	22.8067	3.57376	PVX_001040, transcription factor with AP2 domain(s), putative (ApiAP2)
PcyM_0306000	13.1508	8.66259	0.789955	0.407559	0.281174	0.49159	0.5278	7.53444	0.427031
PcyM_0306100	470.417	332.283	1185.42	48.6553	30.5656	1.19776	1.27778	662.708	20.4241	PVX_001035, hypothetical protein, conserved
PcyM_0306200	154.895	151.291	247.023	9.22546	0.832265	0.260605	2.02268	184.403	3.08525
PcyM_0306300	30.3067	31.1308	38.0197	0.631945	0.278512	0.101218	4.75221	33.1524	1.44097	PVX_001030, hypothetical protein, conserved
PcyM_0306400	135.547	105.276	6.06598	1.68249	69.2501	0.38917	0.275393	82.2962	17.8993	PVX_001025, 6-cysteine protein (P36)
PcyM_0306500	30.2977	8.54512	1.15301	0.177667	3.85332	0.538558	0.291037	13.3319	1.21515	PVX_001020, 6-cysteine protein (P52)
PcyM_0306600	182.417	116.314	207.551	2.48066	6.52464	1.02967	0.42542	168.761	2.6151	PVX_001015, 6-cysteine protein, putative
PcyM_0306700	67.0671	100.683	159.499	0.425159	0.528627	6.66443	1.84795	109.083	2.36654	PVX_001010, hypothetical protein, conserved
PcyM_0306800	67.2103	58.4416	173.576	0.112399	2.37684	0.691911	2.10228	99.7427	1.32086	PVX_001005, dipeptidyl aminopeptidase 3, putative (DPAP3)
PcyM_0306900	7.70202	1.66607	0.194895	0.213108	0.10946	0.0699747	0.202534	3.18766	0.148769	PVX_001000, hypothetical protein, conserved
PcyM_0307000	0.0436904	0.0903931	0.102026	0.087026	0.136396	0.187017	0.117883	0.0787033	0.13208	PVX_000995, 6-cysteine protein (P41)
PcyM_0307100	2.25638	9.03202	3.4514	0.36889	0.0270105	0.0055493	0.114534	4.91327	0.128996	PVX_000990, ATP-dependent RNA helicase protein, putative
PcyM_0307200	9.71091	8.55072	3.98223	0.0431145	0.110283	0.0525102	2.3722	7.41462	0.644528	PVX_000985, protein transport protein Sec24B, putative (SEC24B)
PcyM_0307300	25.6136	42.1081	0.155668	0.102272	0.210432	39.194	0.00816547	22.6258	9.87871
PcyM_0307400	0.739328	0.0778031	5.3593	0.0151713	0.0720166	0.120267	0.00886343	2.05881	0.0540797	PVX_000980, Plasmodium yoelii blood stage membrane protein ag-1, putative
PcyM_0307500	624.012	862.917	1132.61	4.66744	4.88756	12.6409	22.7183	873.18	11.2286	PVX_000975, liver specific protein 2, putative (LISP2)
PcyM_0307600	23.7203	26.3901	28.4788	1.06403	0.772216	0.563406	10.3206	26.1964	3.18006	PVX_000970, pre-mRNA-processing-splicing factor 8, putative
PcyM_0307700	16.0602	1.48841	14.4023	0.0681775	0.206228	0.0595424	0.846546	10.6503	0.295123
PcyM_0307800	4.80738	2.29926	0.982697	0.0897217	0.467197	0.0406591	0.338014	2.69645	0.233898
PcyM_0307900	47.9876	159.802	54.3362	1.59818	0.946714	0.780555	0.00689524	87.3752	0.833087
PcyM_0308000	0.532239	0.676111	1.92854	0.00532488	0.0120491	0.0399518	0.0158966	1.04563	0.0183056	PVX_000955, lysine decarboxylase, putative
PcyM_0308100	46.3019	18.7312	27.5108	3.41369	2.51936	1.17195	1.92975	30.848	2.25869	PVX_000950, hypothetical protein, conserved
PcyM_0308200	236.281	290.632	526.475	29.4729	5.72317	34.0692	2.86957	351.129	18.0337	PVX_000945, apical sushi protein, putative (ASP)
PcyM_0308300	16.7422	54.5463	58.5124	2.84744	0.785274	0.122305	0.354652	43.2669	1.02742	PVX_000940, hypothetical protein, conserved
PcyM_0308400	5.73939	1.60844	7.29	0.067491	0.115529	0.0722326	0.0751767	4.87928	0.0826073	PVX_000935, vacuolar ATP synthase subunit b, putative
PcyM_0308500	0.119397	0.232074	0.199662	0.120389	1.99029	0.189507	0.354471	0.183711	0.663665	PVX_000930, sexual stage antigen s16, putative
PcyM_0308600	74.3885	61.7056	57.5416	0.235658	1.08814	0.427717	0.88754	64.5452	0.659764	PVX_000925, hydroxyacyl glutathione hydrolase, putative
PcyM_0308700	386.778	344.501	312.555	0.386188	10.2614	0.13359	2.11316	347.945	3.2236
PcyM_0308800	39.1856	70.7819	101.526	2.48779	0.732942	3.27852	4.19676	70.4979	2.674
PcyM_0308900	1.16977	1.7271	2.11267	3.3266	0.191504	0.267913	0.722021	1.66984	1.12701	PVX_000915, hypothetical protein, conserved
PcyM_0309000	26.4217	39.8382	20.2545	1.51376	0.515588	0.249744	0.726545	28.8381	0.751409	PVX_000910, hypothetical protein, conserved
PcyM_0309100	69.2722	26.557	137.872	8.97304	2.98166	0.197704	0.570956	77.9003	3.18084	PVX_000905, hypothetical protein, conserved
PcyM_0309200	13.9309	1.90253	41.152	0.0133825	0.351914	0.114547	0.00302706	18.9951	0.120718	PVX_000900, hypothetical protein, conserved
PcyM_0309300	56.3212	122.415	122.554	5.65804	4.15871	6.16409	20.7201	100.43	9.17525	PVX_000895, hypothetical protein, conserved
PcyM_0309400	250.238	237.098	258.087	19.2365	4.1427	34.436	15.0568	248.474	18.218	PVX_000890, methyltransferase, putative
PcyM_0309500	734.096	760.372	1115.1	69.1413	24.6698	190.572	93.3104	869.855	94.4234
PcyM_0309600	74.2591	144.091	0.632506	1.25755	2.70721	0.799878	1.10375	72.9944	1.4671	PVX_000885, peptidyl-tRNA hydrolase, putative
PcyM_0309700	7.48304	30.4146	5.25323	0.260116	0.180744	0.259403	0.00267162	14.3836	0.175733	PVX_000880, hypothetical protein, conserved
PcyM_0309800	21.547	19.2614	5.8662	3.96983	0.0150558	0.054697	6.30905	15.5582	2.58716	PVX_000875, hypothetical protein, conserved
PcyM_0309900	1.66808	4.68182	0.0166611	0.00913128	0.0374518	0.131176	0.0210496	2.12219	0.0497022
PcyM_0310000	0.235381	0.520045	2.57107	0.113507	33.0023	0.0250557	0.144917	1.10883	8.32144
PcyM_0310100	27.7921	25.9166	15.9412	1.00398	7.58015	0.384477	0.102524	23.2166	2.26778	PVX_000860, hypothetical protein, conserved
PcyM_0310200	10.3682	8.38279	0.676702	0.028272	0.0723037	0.679566	0.160362	6.4759	0.235126	PVX_000855, hypothetical protein, conserved
PcyM_0310300	41.3258	50.0088	52.8166	1.34904	2.16	12.5254	3.386	48.0504	4.85512	PVX_000850, AAA family ATPase, putative
PcyM_0310400	2.1816	1.76885	0.181855	0.329171	0.430352	0.261731	1.05845	1.37744	0.519925
PcyM_0310500	22.3805	15.5742	20.1731	2.71292	0.687346	2.62232	0.0661693	19.376	1.52219	PVX_000840, hypothetical protein, conserved
PcyM_0310600	47.8925	30.7268	376.671	0.13341	2.15492	0.936803	0.569575	151.763	0.948676	PVX_000835, hypothetical protein, conserved
PcyM_0310700	8.15807	1.92653	0.942151	0.281161	0.440448	0.205745	0.37802	3.67558	0.326344	PVX_000830, hypothetical protein, conserved
PcyM_0310800	7.51609	7.06207	44.5904	0.584727	0.175679	0.25085	0.127077	19.7229	0.284583	PVX_000825, hypothetical protein, conserved
PcyM_0310900	4.62412	2.1366	0.0217369	0.0306456	0.103185	0.0456993	0.131459	2.26082	0.0777473	PVX_000820, flap endonuclease 1, putative (FEN1)
PcyM_0311000	6.79777	8.31761	12.0315	1.52867	8.02223	1.55424	2.74551	9.04895	3.46266
PcyM_0311100	115.991	63.25	24.4434	0.0555508	0.0143456	13.9368	0.0116223	67.8948	3.50458	PVX_000815, sporozoite invasion-associated protein 1, putative (SIAP1)
PcyM_0311200	5.47207	22.2468	0.127017	0.59798	0.243072	2.81433	1.66537	9.28195	1.33019	PVX_000810, perforin-like protein 1 (PLP1)
PcyM_0311300	13.3553	0.821475	2.97345	0.737628	0.549316	0.180723	2.14359	5.71675	0.902815	PVX_000805, hypothetical protein, conserved
PcyM_0311400	13.5826	10.2137	48.8955	0.367142	0.77508	1.42832	0.0453754	24.2306	0.653979	PVX_000800, tRNA N6-adenosine threonylcarbamoyltransferase, putative (KAE1)
PcyM_0311500	49.7694	103.722	125.064	0.59181	3.17254	1.52474	3.45052	92.8518	2.1849	PVX_000795, hypothetical protein, conserved
PcyM_0311600	5.08486	9.93779	10.4071	0.327905	0.0267093	0.0694936	0.115051	8.47657	0.13479	PVX_000790, U4/U6 small nuclear ribonucleoprotein PRP31, putative
PcyM_0311700	208.605	232.612	173.984	2.15107	2.09451	28.8953	25.9065	205.067	14.7618	PVX_000785, ribosomal processing protein, putative
PcyM_0311800	73.9827	25.6773	19.6077	0.103622	0.394087	11.6016	0.196984	39.7559	3.07406	PVX_000780, hypothetical protein, conserved
PcyM_0311900	26.7558	44.3513	39.0774	0.329764	0.513831	3.2716	0.0452767	36.7282	1.04012	PVX_000775, chaperone DNAJ protein, putative
PcyM_0312000	122.717	79.4554	13.6057	20.5261	1.41233	0.451472	0.446586	71.926	5.70911	PVX_000770, hypothetical protein, conserved
PcyM_0312100	85.1708	18.4811	3.84904	0.759692	79.1781	2.08113	0.590308	35.8336	20.6523
PcyM_0312200	0.519065	0.706728	2.9843	0.182835	0.0243091	0.0327305	0.000580753	1.40337	0.0601138	PVX_000765, replication protein A1, large subunit, putative
PcyM_0312300	46.6335	81.37	123.76	4.43716	3.58346	6.78385	15.2626	83.9211	7.51676	PVX_000760, hypothetical protein, conserved
PcyM_0312400	64.4995	72.5869	36.9032	5.84975	1.57505	3.15924	1.10042	57.9966	2.92112	PVX_000755, zinc finger protein, putative
PcyM_0312500	22.7588	1.70844	0.363224	4.93962	0.0639211	0.156823	0.0107348	8.27683	1.29277	PVX_000750, actin-like protein, putative
PcyM_0312600	0.614724	1.03701	3.77797	0.834092	0.809984	0.12577	1.17411	1.8099	0.735988	PVX_000745, erythrocyte vesicle protein 1, putative (EVP1)
PcyM_0312700	1.79887	5.16834	2.58881	0.453349	0.0728296	0.134575	0.0853025	3.18534	0.186514	PVX_000735, protein phosphatase PPM1, putative (PPM1)
PcyM_0312800	6.119	12.5389	16.1528	0.0784378	0.230671	0.0780869	0.106587	11.6036	0.123446	PVX_000730, exosome complex component RRP4, putative (RRP4)
PcyM_0312900	533.697	559.644	370.023	25.0206	2.00378	47.0385	6.78125	487.788	20.211	PVX_000725, hypothetical protein, conserved
PcyM_0313000	7.51815	12.2311	8.89192	0.156481	0.192156	1.99442	0.308697	9.54707	0.662939	PVX_000720, hypothetical protein, conserved
PcyM_0313100	50.5148	38.4619	76.4885	9.91283	0.389538	0.0919962	0.892136	55.1551	2.82162	PVX_000715, ribosome biogenesis GTPase A, putative (RbgA)
PcyM_0313200	0.263673	0.583672	9.51673	0.673116	0.0228401	0.0300914	0.0341099	3.45469	0.190039	PVX_000710, hypothetical protein, conserved
PcyM_0313300	27.7136	16.2982	7.73121	6.02929	0.443447	1.54715	0.674502	17.2477	2.1736	PVX_000705, hypothetical protein, conserved
PcyM_0313400	2.65822	3.35978	3.75191	0.0601565	0.119293	1.72728	0.0311028	3.25663	0.484459	PVX_000700, hypothetical protein, conserved
PcyM_0313500	12.6937	9.65757	14.4492	0.996492	0.467868	1.21046	0.683074	12.2668	0.839472	PVX_000695, hypothetical protein, conserved
PcyM_0313600	14.275	4.69625	0.00366295	4.43541	0.00649474	0.0325238	0.00354496	6.32497	1.11949
PcyM_0313700	178.279	335.081	220.671	6.48821	7.93757	14.9808	8.46921	244.677	9.46894	PVX_000685, hypothetical protein, conserved
PcyM_0313800	56.8239	50.2695	148.117	0.983925	2.82062	2.30156	2.92405	85.0702	2.25754	PVX_000680, RNA helicase, putative
PcyM_0313900	21.8196	21.5673	12.0002	7.07338	11.0925	7.01737	6.85705	18.4624	8.01007
PcyM_0314000	5.38252	8.48635	3.08496	1.97665	1.78946	1.19322	0.566372	5.65128	1.38142
PcyM_0314100	0.691609	0.857044	1.14974	0.547113	0.191757	0.113956	0.139084	0.899464	0.247977	PVX_000675, hypothetical protein
PcyM_0314200	1.45054	4.11788	4.40697	0.202359	0.163311	0.0145754	0.0328249	3.32513	0.103268	PVX_000670, hypothetical protein, conserved
PcyM_0314300	7.77711	1.66487	30.242	0.153276	30.2849	0.453318	0.275783	13.228	7.79181
PcyM_0314400	29.7262	40.3457	68.8576	0.0297921	1.1344	0.0432604	0.400039	46.3098	0.401872	PVX_000660, hypothetical protein
PcyM_0314500	7.11966	7.08489	2.77564	0.104559	0.0175373	4.62137	0.00669206	5.66006	1.18754	PVX_000650, DNA polymerase alpha, putative
PcyM_0314600	3.68752	2.75914	0.0257807	0.00931695	0.00306661	0.681017	0.0195706	2.15748	0.178243	PVX_000650, DNA polymerase alpha, putative
PcyM_0314700	0.253527	0.234628	0.0187659	0.0663029	0.174117	0.183244	0.106604	0.168974	0.132567
PcyM_0314800	19.2496	0.225044	0.135927	0.0182678	0.0284749	0.184883	0.0634827	6.53684	0.0737772	PVX_000645, hypothetical protein, conserved
PcyM_0314900	20.9739	32.45	19.7205	0.231172	0.306265	0.207759	1.22079	24.3815	0.491495	PVX_000640, 30S ribosomal protein S12, putative
PcyM_0315000	74.4052	44.2703	0.293222	6.86252	0.152366	0.279793	0.23382	39.6563	1.88212	PVX_000635, hypothetical protein, conserved
PcyM_0315100	388.528	450.73	676.877	19.601	11.4275	6.46013	14.7936	505.379	13.0706	PVX_000630, phosphopantothenoylcysteine synthetase, putative
PcyM_0315200	1.33266	0.0693423	0.00314371	0.00818202	0.047305	0.0555865	0.000443209	0.468384	0.0278792
PcyM_0315300	73.7476	90.34	98.3941	0.823486	0.707215	4.67694	3.66393	87.4939	2.46789	PVX_000620, protein SDA1, putative (SDA1)
PcyM_0315400	11.9905	11.3816	15.0033	1.89889	5.35205	4.10258	2.3922	12.7918	3.43643
PcyM_0315500	0.96069	4.45985	22.1927	0.0693494	0.0787524	0.0280005	0.578674	9.20443	0.188694	PVX_000615, hypothetical protein, conserved
PcyM_0315600	26.0043	8.94413	27.7362	0.347043	0.203113	1.14869	0.0709512	20.8949	0.442448	PVX_000610, hypothetical protein, conserved
PcyM_0315700	112.2	134.696	73.6388	2.33972	3.60269	2.72473	1.25915	106.845	2.48157
PcyM_0315800	5.24447	1.39174	3.77523	0.00971702	0.0392228	0.103945	0.12234	3.47048	0.0688061	PVX_000604, hypothetical protein, conserved
PcyM_0315900	74.2622	64.5726	0.0408768	8.22623	6.1531	0.0871321	14.5208	46.2919	7.24682	PVX_000600, cysteine desulfurase, putative (SufS)
PcyM_0316000	1.2646	0.344895	0.511628	0.00296398	0.0113387	0.00270003	0.00294969	0.70704	0.0049881	PVX_000595, hypothetical protein, conserved
PcyM_0316100	410.673	348.9	350.521	20.6933	5.58227	40.5694	38.4075	370.032	26.3131	PVX_000590, eukaryotic translation initiation factor 3 subunit 2, putative
PcyM_0316200	49.3585	124.527	67.6345	0.0694615	2.40858	0.0194891	0.222703	80.5068	0.680058	PVX_000585, transporter/permease protein, putative
PcyM_0316300	124.479	156.479	47.9285	7.67085	0.350472	16.7951	0.0706273	109.629	6.22177	PVX_000580, hypothetical protein, conserved
PcyM_0316400	144.682	199.495	296.266	7.52878	2.36108	1.57271	8.96554	213.481	5.10703
PcyM_0316500	68.9616	35.2908	13.2304	4.67585	0.114161	0.317143	0.149712	39.1609	1.31422	PVX_000570, hypothetical protein, conserved
PcyM_0316600	12.7895	41.5958	10.7566	11.8428	0.065901	0.140689	0.0484207	21.714	3.02445	PVX_000565, hypothetical protein, conserved
PcyM_0316700	855.411	829.56	1513.4	34.9645	37.236	45.3242	10.2381	1066.12	31.9407	PVX_000560, queuine tRNA-ribosyltransferase, putative
PcyM_0316800	21.3947	3.80418	8.36973	1.58407	1.97851	206.258	4.99298	11.1896	53.7033	PVX_000555, calcium-dependent protein kinase 4, putative (CDPK4)
PcyM_0316900	4.44102	2.37355	0.545835	0.0611517	0.072636	0.0862097	0.0443034	2.45347	0.0660752	PVX_000550, hypothetical protein, conserved
PcyM_0317000	3.04379	9.54212	0.0126087	0.033583	0.00334231	0.00576143	0.00187557	4.19951	0.0111406
PcyM_0317100	1.83483	0.139287	33.9891	3.38472	0.153405	0.0828178	0.0584533	11.9877	0.91985	PVX_000540, hypothetical protein, conserved
PcyM_0317200	93.671	61.4425	261.442	7.04187	8.20242	2.88571	0.855883	138.852	4.74647	PVX_000535, thioredoxin, putative
PcyM_0317300	0.723186	0.934464	0.0399686	0.0383797	0.0831858	0.103918	0.0592864	0.565873	0.0711925	PVX_000530, hypothetical protein, conserved
PcyM_0317400	0.5675	0.144365	0.0508428	0.0412647	0.0521473	0.150007	0.210235	0.254236	0.113413
PcyM_0317500	1.52807	1.98497	1.78462	0.260954	0.454335	0.291119	1.01172	1.76589	0.504533
PcyM_0317600	0.350456	0.443978	0.0868331	0.0624359	0.0967153	0.0428747	0.0470388	0.293756	0.0622662
PcyM_0317700	0.0332483	0.0504457	0.0284144	0.0225915	0.140972	0.235814	66.2914	0.0373695	16.6727	PVX_000530, hypothetical protein, conserved
PcyM_0317800	2.55215	2.75971	4.48758	0.106117	0.0575647	3.41276	0.00357981	3.26648	0.895004
PcyM_0318000	0.805201	0.624652	0.0489403	2.00008	0.0268965	0.0531487	0.0224917	0.492931	0.525655	PVX_096410, cysteine repeat modular protein 2, putative (CRMP2)
PcyM_0318100	8.22198	15.297	3.98237	1.03542	1.22622	0.97147	1.30333	9.16712	1.13411	PVX_096405, 30S ribosomal protein S8, putative
PcyM_0318200	81.4174	117.144	88.3971	2.40382	2.95077	0.0606924	0.0495468	95.6527	1.36621	PVX_096400, prefoldin subunit 3, putative
PcyM_0318300	8.60221	18.1274	0.55217	0.577276	0.10405	0.0443159	0.123774	9.09392	0.212354	PVX_096395, hypothetical protein, conserved
PcyM_0318400	28.619	27.2663	0.0638092	0.329589	0.658529	0.0183911	0.0847595	18.6497	0.272817	PVX_096390, hypothetical protein, conserved
PcyM_0318500	18.3256	8.75371	13.7564	0.0169392	0.0213799	0.0129121	0.0203597	13.6119	0.0178977
PcyM_0318600	1.62046	6.18305	53.0314	0.0409509	0.0793836	0.0031458	0.0798346	20.2783	0.0508287
PcyM_0318700	62.0127	51.313	122.446	0.0395892	1.96608	0.00798839	0.00309957	78.5906	0.504189
PcyM_0318800	141.759	117.633	355.581	0.836204	0.104582	0.00930099	0.163917	204.991	0.278501
PcyM_0318900	0.00848285	21.3943	0.0291235	0.0220948	0.0409829	0.00386559	0.0427684	7.14398	0.0274279
PcyM_0319000	16.7161	5.30511	1.43421	0.344064	0.842669	2.53004	3.81666	7.81848	1.88336
PcyM_0319100	17.9413	13.2954	0.368065	0.0642131	0.0355511	0.289847	0.0566601	10.5349	0.111568
PcyM_0319200	0.152742	1.16937	0.00513914	0.018769	0.012924	0.132425	0.063901	0.442416	0.0570047
PcyM_0319300	0.460123	0.914526	35.6568	0.226127	0.449406	0.123323	0.893611	12.3438	0.423117	PVX_096385, hypothetical protein, conserved
PcyM_0319400	0.192562	0.0866751	0.918122	0.0646521	0.509769	0.0791656	0.254273	0.39912	0.226965	PVX_096380, conserved Plasmodium protein, unknown function
PcyM_0319500	20.346	12.8657	34.2054	0.0196145	0.024544	2.09441	0.0489151	22.4724	0.546872	PVX_096370, hypothetical protein, conserved
PcyM_0319600	363.214	336.477	588.405	20.59	7.62595	30.032	9.71176	429.365	16.9899	PVX_096365, hypothetical protein
PcyM_0319700	0.993763	0.71734	0.182458	0.0406931	0.248982	0.130631	0.147993	0.631187	0.142075	PVX_096360, serine/threonine-protein kinase NEK4, putative
PcyM_0319800	28.5989	38.5189	83.121	1.36041	6.35465	0.00981076	0.0196372	50.0796	1.93613	PVX_096355, actin-related protein, putative (ARP6)
PcyM_0319900	52.4271	87.3708	141.918	0.0934252	0.417444	1.4688	0.105655	93.9054	0.521332	PVX_096350, hypothetical protein, conserved
PcyM_0320000	44.7623	55.4793	51.7725	0.8755	7.72202	0.459209	1.5313	50.6714	2.64701	PVX_096345, hypothetical protein, conserved
PcyM_0320100	627.416	463.023	895.909	17.7011	10.338	26.7491	6.38882	662.116	15.2943	PVX_096335, 40S ribosomal protein S10, putative
PcyM_0320200	73.35	73.0098	38.9929	1.03152	4.78724	0.55055	0.00432256	61.7843	1.59341	PVX_096330, hypothetical protein, conserved
PcyM_0320300	14.5807	5.20758	13.3518	0.0488652	0.0202922	0.0519746	0.0107023	11.0467	0.0329586
PcyM_0320400	467.97	561.573	847.988	39.7084	48.8222	13.3683	11.3271	625.844	28.3065	PVX_096320, exosome complex component CSL4, putative (CSL4)
PcyM_0320500	4.50638	2.13817	0.0860942	0.0780718	0.0555911	0.719524	0.0748872	2.24355	0.232018
PcyM_0320600	27.1208	12.285	3.24918	7.91281	3.08484	2.33395	1.26628	14.2183	3.64947	PVX_096307, conserved Plasmodium protein, unknown function
PcyM_0320700	14.8378	4.79408	25.4872	1.97191	2.0777	0.122225	5.18015	15.0397	2.338	PVX_096305, ferrodoxin reductase, putative
PcyM_0320800	28.2744	11.7624	75.6815	0.0445915	0.0988013	0.0408999	0.0285654	38.5728	0.0532145
PcyM_0320900	0.182577	0.100221	0.16864	0.0149196	0.0132413	0.00548215	0.00627929	0.150479	0.0099806
PcyM_0321000	18.5177	29.3494	5.76496	10.8336	16.5835	3.29902	4.38997	17.8774	8.77651
PcyM_0321100	7.28533	19.8493	1.44981	0.640919	0.825086	0.615289	0.968547	9.52816	0.76246
PcyM_0321200	3.90825	6.88044	0.102297	0.0121392	0.150569	0.0366034	0.821354	3.63033	0.255166
PcyM_0321300	16.9784	7.26678	12.8132	1.37277	0.0100602	0.0134039	5.97125	12.3528	1.84187	PVX_096289, hypothetical protein
PcyM_0321400	4.73665	7.9176	0.0667257	0.0210697	0.0762821	0.740081	0.0458869	4.24032	0.22083	PVX_096285, hypothetical protein, conserved
PcyM_0321500	1006.99	1138.6	1343.24	68.8179	38.2608	18.1647	94.0947	1162.94	54.8345	PVX_096280, hypothetical protein, conserved
PcyM_0321600	5.38402	1.67142	0.570465	0.139258	0.857472	0.0350301	1.94821	2.54197	0.744992	PVX_096275, hypothetical protein, conserved
PcyM_0321700	47.2146	28.5834	121.529	0.568348	0.906189	0.226295	0.565063	65.7758	0.566474	PVX_096273, DEAD/DEAH box ATP-dependent RNA helicase, putative
PcyM_0321800	214.02	102.145	10.5263	24.3942	4.53729	24.7666	0.151302	108.897	13.4623	PVX_096271, conserved Plasmodium protein, unknown function
PcyM_0321900	524.619	549.705	553.181	36.3509	7.85698	21.6643	6.66052	542.502	18.1332	PVX_096265, 40S ribosomal protein S5, putative
PcyM_0322000	23.1341	80.4672	0.310912	0.121341	1.60394	0.238993	0.223185	34.6374	0.546865	PVX_096260, hypothetical protein, conserved
PcyM_0322100	37.9798	26.969	12.1989	2.04527	0.822764	1.50744	3.51186	25.7159	1.97183	PVX_096255, hypothetical protein, conserved
PcyM_0322200	41.6614	73.2322	2.27439	0.542051	0.563754	5.25508	7.10317	39.056	3.36602	PVX_096253, conserved Plasmodium protein, unknown function
PcyM_0322300	7.97372	0.378143	0.117165	0.0250428	0.0528761	0.0085001	0.0388671	2.82301	0.0313215
PcyM_0322400	35.1799	22.4576	31.1602	0.131814	1.16441	4.32284	0.177771	29.5992	1.44921	PVX_096250, PelOta protein homologue, putative
PcyM_0322500	82.6756	69.811	102.068	0.414932	0.425683	3.29812	6.00276	84.8516	2.53537
PcyM_0322600	0.560066	3.04958	24.0247	0.0122823	0.0480622	0.0249432	0.0568935	9.21146	0.0355453	PVX_096240, hypothetical protein, conserved
PcyM_0322700	3.17266	0.613039	33.1158	1.84094	0.140289	0.100344	0.0386002	12.3005	0.530045	PVX_096235, GTP-binding protein, putative
PcyM_0322800	67.7298	68.4047	43.8586	3.82928	0.720595	10.1289	8.13247	59.9977	5.70281	PVX_096230, hypothetical protein, conserved
PcyM_0322900	45.8295	71.0428	8.00707	3.57185	7.25876	0.233706	4.56128	41.6265	3.9064	PVX_096225, hypothetical protein, conserved
PcyM_0323000	661.755	596.329	357.02	12.9389	14.4377	256.713	129.777	538.368	103.467	PVX_096220, hypothetical protein, conserved
PcyM_0323100	2.92918	5.40217	0.0997917	0.225835	0.352859	0.308508	2.98554	2.81038	0.968187	PVX_096215, hypothetical protein, conserved
PcyM_0323200	61.7169	56.5484	110.454	0.118443	10.5568	1.30762	10.3417	76.2397	5.58114
PcyM_0323300	59.5329	105.141	129.189	13.9309	28.7353	5.87217	1.17022	97.9543	12.4271	PVX_096205, hypothetical protein, conserved
PcyM_0323400	12.845	11.0251	2.42319	10.807	0.0954232	0.117978	0.0184535	8.76445	2.75972	PVX_096200, hypothetical protein, conserved
PcyM_0323500	1.16095	0.980281	3.75668	0.13724	0.743851	0.181798	0.114732	1.96597	0.294405	PVX_096195, hypothetical protein, conserved
PcyM_0323600	0.603635	0.57055	0.196808	0.0330524	0.0835565	0.109987	0.0188574	0.456997	0.0613632
PcyM_0323700	2.58032	0.646159	0.851426	0.584748	0.0273884	0.0690435	0.0311002	1.3593	0.17807	PVX_096180, hypothetical protein
PcyM_0323800	1.86473	0.921776	0.741749	0.0763948	0.109415	0.291785	0.0707095	1.17608	0.137076	PVX_096175, dynactin subunit 5, putative
PcyM_0323900	10.3132	16.5136	17.6405	1.08576	0.0399892	0.477947	0.292524	14.8224	0.474056	PVX_096170, hypothetical protein, conserved
PcyM_0324000	93.0745	114.459	337.605	5.76389	1.87213	2.82039	1.02846	181.713	2.87122
PcyM_0324100	7.74604	0.336768	0.0870573	0.0695373	0.0245233	0.0165649	0.0195963	2.72329	0.0325555
PcyM_0324200	0.731231	0.118475	2.07761	0.00975186	0.0346719	0.0180747	0.0281544	0.975772	0.0226632	PVX_096155, hypothetical protein, conserved
PcyM_0324300	0.626769	2.15477	0.345204	0.319783	0.36759	0.0980721	0.383758	1.04225	0.292301
PcyM_0324400	0.717671	1.21376	0.0216231	0.0160041	0.00972525	0.0233349	0.0126151	0.651018	0.0154198
PcyM_0324500	242.804	265.044	561.559	18.5475	4.0467	0.181147	8.97597	356.469	7.93784	PVX_096145, Rab GTPase activator and protein kinase, putative
PcyM_0324600	124.858	127.075	93.5723	3.10609	0.143467	1.78648	2.36332	115.168	1.84984
PcyM_0324700	8.2427	4.1251	15.4192	0.0916464	0.091466	0.0590461	0.033771	9.26232	0.0689824
PcyM_0324800	10.8065	0.414049	172.72	0.117179	0.153348	7.08705	0.0924358	61.3135	1.8625	PVX_096135, type 2A phosphatase-associated protein 42, putative (TAP42)
PcyM_0324900	155.589	164.109	24.6555	0.0739345	13.787	14.9525	5.81595	114.785	8.65734	PVX_096130, 3-demethylubiquinone-9 3-methyltransferase, putative
PcyM_0325000	0.242277	0.41664	0.0722848	0.205741	0.294298	0.0564905	0.0629505	0.243734	0.15487
PcyM_0325100	3.51877	0.483551	0.0250826	0.0434946	1.4983	0.0137576	0.0556652	1.34247	0.402804
PcyM_0325200	32.3917	26.3757	15.8162	1.4196	1.03763	5.88272	8.52469	24.8612	4.21616
PcyM_0325300	30.155	25.3793	10.6788	0.10327	0.202185	0.0127529	0.000222304	22.071	0.0796075	PVX_096110, hypothetical protein, conserved
PcyM_0325400	45.7931	33.0125	7.14373	10.7735	0.221745	0.162621	1.94827	28.6498	3.27653	PVX_096105, kelch domain-containing protein
PcyM_0325500	0.67583	0.0253941	0.297694	0.0166317	0.0318795	0.0258644	0.0340525	0.332973	0.027107	PVX_096095, kinesin-19, putative
PcyM_0325600	7.37611	6.63199	11.8189	0.120536	0.0223502	0.0782447	0.0120545	8.60899	0.0582965	PVX_096090, exonuclease I, putative
PcyM_0325700	2.14709	3.38398	0.204985	8.32258	0.0526398	11.5246	0.00992677	1.91202	4.97744	PVX_096085, hypothetical protein, conserved
PcyM_0325800	198.055	170.243	348.444	5.83598	8.35345	11.8891	9.32884	238.914	8.85185	PVX_096080, mago nashi domain containing protein
PcyM_0325900	2.77716	3.5774	0.0407254	0.0185817	0.0433188	0.0349858	0.0155196	2.13176	0.0281015	PVX_096075, hypothetical protein, conserved
PcyM_0326000	0.864113	1.38393	0.180434	0.146289	0.161658	0.181063	0.0471611	0.809492	0.134043	PVX_096071, conserved Plasmodium protein, unknown function
PcyM_0326100	13124.9	9759.83	2499.75	408.495	274.495	371.769	65.2441	8461.49	280.001
PcyM_0326200	7125.32	5427.62	970.968	274.062	179.731	155.874	112.589	4507.97	180.564
PcyM_0326300	1.72946	1.309	0.222291	0.0758148	0.229931	0.0807916	0.121376	1.08692	0.126978
PcyM_0326400	3.26797	0.0269693	59.8754	0.0874528	0.145155	0.69532	0.337289	21.0568	0.316304	PVX_096070, early transcribed membrane protein (ETRAMP)
PcyM_0326500	25.2542	38.8165	14.6254	0.038275	0.0407682	0.176355	0.55761	26.232	0.203252	PVX_096065, Plasmodium exported protein, unknown function
PcyM_0326600	542.708	573.207	667.438	0.51724	3.36799	0.419545	9.88211	594.451	3.54672	PVX_096060, hypothetical protein
PcyM_0326700	1.19151	3.37378	1.03806	1.02704	0.564515	0.187817	0.0778885	1.86778	0.464315
PcyM_0326800	0.569065	0.757959	0.356177	0.214831	0.647914	0.0691951	0.223854	0.561067	0.288948
PcyM_0326900	0.0137762	0.0533134	0.0182688	0.0127736	0.0080809	0.0298657	0.0689664	0.0284528	0.0299216
PcyM_0327000	0.284691	0.46455	0.283049	0.087101	0.262381	0.208264	0.049124	0.344097	0.151718	PVX_096015, Plasmodium exported protein, unknown function
PcyM_0327100	24.6214	1.31696	0.137515	0.114496	0.210592	0.190078	0.107895	8.69195	0.155765
PcyM_0327200	0.255552	0.845938	0.788848	0.0507025	0.157388	0.0778205	0.0417142	0.630112	0.0819063
PcyM_0327300	1.98922	4.18859	0.550431	0.349561	1.01928	0.534203	0.885705	2.24275	0.697188
PcyM_0327400	0.947232	0.96971	0.614834	0.429437	0.484738	0.257239	1.92685	0.843925	0.774567
PcyM_0327500	1.69208	1.23363	0.104086	0.342758	1.02535	1.30881	0.186804	1.00993	0.715929
PcyM_0327600	1.53042	3.67782	0.882833	0.719918	1.15673	0.204488	0.745141	2.03036	0.706568	PVX_096001, VIR protein
PcyM_0327700	4.71679	6.19492	5.11557	0.391561	0.962512	1.69038	1.76167	5.34243	1.20153	PVX_003475, hypothetical protein, conserved; PVX_094230, hypothetical protein
PcyM_0327800	65.7163	49.2077	87.3821	7.31583	5.94319	0.0731106	0.514281	67.4354	3.4616
PcyM_0327900	1.55088	2.42941	1.34631	0.54001	2.27272	0.148492	1.84901	1.77553	1.20256
PcyM_0328000	0.0369956	0.0570218	0.0161609	0.0121451	0.0254572	0.00820145	0.0146044	0.0367261	0.015102
PcyM_0328100	5.41843	11.1953	2.2131	2.25656	6.51836	1.20281	2.14902	6.27561	3.03169
PcyM_0328200	0	1.2236	0	0.0520463	0.0868344	0.0191487	0.0141278	0.407868	0.0430393
PcyM_0328300	2.10046	8.98782	19.1873	3.56569	6.84324	5.37992	14.4253	10.0919	7.55353
PcyM_0328400	0.845947	8.50237	0.395392	0.686158	1.76879	0.130529	0.730468	3.2479	0.828987
PcyM_0328500	0.393761	0.83205	0.0862765	0.392156	0.0557144	0.45255	0.664247	0.437363	0.391167
PcyM_0328600	2.68573	11.3056	6.59912	2.20851	2.56398	1.82997	3.33835	6.86348	2.4852
PcyM_0328700	0.923933	2.8711	0.195591	0.481321	0.540258	0.177256	0.562567	1.33021	0.44035
PcyM_0328800	1.59167	1.9344	4.50752	0.522772	0.345687	0.227556	0.829504	2.67786	0.48138
PcyM_0328900	2.638	2.76505	1.54996	0.52587	0.649645	0.643939	0.391116	2.31767	0.552643
PcyM_0329000	0.0768644	0.613735	0.0817467	0.122399	0.112252	0.0747568	0.0951618	0.257449	0.101142
PcyM_0329100	0.137441	0.856171	0.168502	0.108863	0.377434	0.051475	0.234718	0.387371	0.193123
PcyM_0329200	0.739199	0.742077	0.119574	0.186243	0.552941	0.0743554	0.125774	0.533617	0.234829
PcyM_0329300	0.0488648	0.202721	0.0228718	0.0279751	0.0334661	0.00211435	0.0156259	0.0914859	0.0197954
PcyM_0329400	3.41311	3.09815	1.2914	0.355166	1.57847	0.379219	0.544676	2.60089	0.714382
PcyM_0329500	0.0687821	0.35766	0	0.0374204	0.0203365	0.0124501	0.012253	0.142147	0.020615
PcyM_0329600	1.22051	1.87406	0.649005	0.501064	0.325885	2.08791	0.231063	1.24786	0.78648
PcyM_0329700	1.05527	1.74853	0.609584	0.552619	0.745525	0.119064	0.105608	1.13779	0.380704
PcyM_0329800	1.23946	1.23258	0.37914	0.55537	0.805135	0.223934	0.188133	0.950392	0.443143
PcyM_0329900	2.19579	1.81011	1.1615	0.67734	1.27219	0.191038	0.345609	1.72247	0.621544
PcyM_0330000	1.45216	1.10572	0.398859	0.297902	0.343653	0.207312	1.02926	0.985579	0.469532
PcyM_0330100	1.31645	11.1118	3.47591	0.552529	0.581273	0.0964601	0.229609	5.30139	0.364968
PcyM_0330200	2.00344	8.48529	0.344183	7.66772	0.653727	3.24451	2.71282	3.61097	3.5697	PVX_097570, Phist protein (Pf-fam-b)
PcyM_0330300	3.88114	4.6559	4.76058	4.64317	1.61393	0.938365	1.1561	4.43254	2.08789
PcyM_0330400	0.21921	0.423421	0.0903428	0.0361554	0.0812295	0.197209	0.116495	0.244325	0.107772
PcyM_0330500	4.086	4.22642	1.65276	0.679943	1.34001	0.701671	0.352212	3.32172	0.768458
PcyM_0330600	0.0314254	0.500987	0.161034	0.124582	0.108903	0.0276175	0.0166772	0.231149	0.0694449
PcyM_0330700	1.42744	3.59405	4.80491	2.3736	1.78788	0.69126	3.97357	3.27547	2.20658
PcyM_0330800	0.0456242	0.273707	0.0562087	0.0859818	0.129729	0	0.0143475	0.12518	0.0575146
PcyM_0330900	6.08403	4.76884	0.822983	1.42111	1.53618	1.10757	3.20025	3.89195	1.81628
PcyM_0331000	7.40701	33.7481	48.4687	7.5591	7.41116	5.33196	16.8073	29.8746	9.27739
PcyM_0331100	0.6015	0.807874	0.590128	0.37341	0.0814811	0.0657205	1.53706	0.666501	0.514418
PcyM_0331200	0.119234	0.558416	0.3335	0.166397	0.155721	0	0.0421243	0.33705	0.0910608
PcyM_0331300	2.07074	2.41602	0.393037	1.77336	5.56932	0.416878	3.04768	1.6266	2.70181
PcyM_0331400	0.263007	1.31856	0.622767	0.179386	0.747667	0.519998	0.280819	0.734779	0.431968
PcyM_0331500	0.0580694	0.264897	0.147147	0.0396446	0.0300894	0.00470789	0.0332511	0.156704	0.0269233
PcyM_0331600	0.14694	0.356956	0.0938667	0.0390512	0.10387	0.0835167	0.110181	0.199254	0.0841546
PcyM_0331700	1.03002	2.70374	12.0089	0.243536	0.682878	0.409322	0.289473	5.24756	0.406302
PcyM_0331800	0.305431	1.11182	0.556511	0.178373	0.240431	0.0594365	0.176048	0.657921	0.163572
PcyM_0331900	0.437795	0.815402	0.0968604	0.150594	0.292993	0.148793	0.229929	0.450019	0.205577
PcyM_0332000	0.575891	0.785422	0.127339	0.120707	0.284461	0.250523	0.202267	0.496218	0.21449
PcyM_0332100	0.339542	2.14803	0.718278	0.266642	0.152852	0.299437	0.0107661	1.06862	0.182424
PcyM_0332200	0.776139	0.449388	0.0354469	0.216851	0.371416	0.0319752	0.11804	0.420325	0.184571
PcyM_0332300	0.239236	1.22892	0.130351	0.308948	0.231279	0.186898	0.215938	0.532836	0.235766
PcyM_0332400	0.145427	0.480031	0.299412	0.152279	0.1271	0.101779	0.0301275	0.30829	0.102821
PcyM_0332500	0.713947	3.34049	0.78064	0.141167	0.544933	0.829831	1.00471	1.61169	0.63016	PVX_090290, variable surface protein Vir12, putative
PcyM_0332600	5.16327	6.65199	0.654648	1.51606	3.44156	0.501091	0.823524	4.15664	1.57056
PcyM_0332700	0.450714	2.19867	3.16854	0.105077	0.0613628	0.106523	0.206617	1.93931	0.119895
PcyM_0332800	0.958451	3.05728	0.251214	0.448589	2.02417	0.412397	1.62793	1.42231	1.12827
PcyM_0332900	5.68503	8.31124	3.6601	1.80524	2.07999	2.45385	2.47018	5.88546	2.20231
PcyM_0333000	0.686774	1.4488	1.07428	0.293963	0.575219	0.175867	0.586501	1.06995	0.407887
PcyM_0333100	2.14955	1.0526	0.25465	0.431241	1.55579	0.702873	0.334684	1.15227	0.756147
PcyM_0333200	1.57988	3.58614	0.623788	0.451219	1.11211	0.607099	0.82065	1.92994	0.747769
PcyM_0333300	0.365169	0.998811	0.297929	0.347256	0.576937	1.29473	0.196139	0.55397	0.603766
PcyM_0333400	0.530422	2.28231	0.246419	0.116061	0.467271	0.137273	0.106003	1.01972	0.206652
PcyM_0333500	1.24718	2.19935	0.54326	0.640786	0.270789	0.115399	0.407013	1.32993	0.358497
PcyM_0400100	0.403473	1.07351	0.812533	0.107129	0.284093	0.121489	0.118709	0.763171	0.157855
PcyM_0400200	0.0239098	0.091254	0.0268112	0.0211403	0.0270641	0.00879896	0.00409659	0.047325	0.015275
PcyM_0400300	0.175833	0.274756	0.195696	0.110725	0.0570055	0	0.0481774	0.215428	0.0539769
PcyM_0400400	0.667387	0.228116	0.0876985	0.146826	0.434115	0.213677	0.389705	0.327734	0.296081	PVX_097570, Phist protein (Pf-fam-b)
PcyM_0400500	2.21342	3.55733	4.4177	0.436489	0.348765	0.534707	0.954572	3.39615	0.568634
PcyM_0400600	2.52559	4.11197	0.860983	0.654156	1.91689	0.193249	0.33047	2.49952	0.773692
PcyM_0400700	2.12683	2.03791	0.328136	0.288709	0.803446	0.0974594	0.0516534	1.49763	0.310317
PcyM_0400800	0.0206219	0.022881	0.0124808	0.00797128	0.00880212	0.00345593	0.00311918	0.0186612	0.00583713
PcyM_0400900	2.28277	3.36239	0.475935	0.856706	0.816669	0.969215	0.500245	2.04037	0.785709	PVX_109785, unspecified product
PcyM_0401000	2.562	2.85488	6.09201	0.378933	0.958861	0.41176	0.921639	3.8363	0.667799
PcyM_0401100	0.0719411	0.533313	0.0185456	0.162302	0.0933329	0.164153	0.112912	0.207933	0.133175	PVX_002485, variable surface protein Vir12-related
PcyM_0401200	1.79168	1.46513	0.223829	0.568634	1.73315	0.35514	0.267517	1.16021	0.731109
PcyM_0401300	3.30521	3.19322	2.09211	1.09809	3.95871	1.02809	0.52629	2.86351	1.65279	PVX_002490, variable surface protein Vir12-related
PcyM_0401400	2.01748	3.21365	1.02169	0.173794	0.358652	0.238222	0.36735	2.08427	0.284505
PcyM_0401500	0.054729	0.0952764	0.0553111	0.0078051	0.0123839	0.0627117	0.254179	0.0684389	0.08427
PcyM_0401600	2.90692	5.06129	1.54141	0.472543	0.563173	0.165483	0.3762	3.16987	0.39435	PVX_002505, Plasmodium exported protein, unknown function
PcyM_0401700	0.00588049	0.132739	0.00342612	0.0310494	0.0510284	0.00312227	0.000982493	0.0473484	0.0215456
PcyM_0401800	0.0100217	0.0847509	0.0866706	0.00360809	0.0112533	0.120646	0.00429942	0.0604811	0.0349516
PcyM_0401900	0.676222	0.149521	0.0309075	0.0188883	0.0530503	0.0140866	0.0180554	0.28555	0.0260201
PcyM_0402000	0.79443	1.99244	0.903965	1.03517	0.868096	0.182191	1.148	1.23028	0.808364	PVX_002535, Pv-fam-b protein
PcyM_0402100	0.433851	0.0133532	0.0172418	0.0207301	0.0292492	0.0612374	0.0303881	0.154815	0.0354012
PcyM_0402200	0.748451	0.479982	0.347426	0.0344936	0.0943362	0.0068431	0.00980026	0.525286	0.0363683
PcyM_0402300	1.86201	0.366121	0.0363386	0.0516663	0.162898	0.0326173	0.0144325	0.754822	0.0654036
PcyM_0402400	1.67347	0.0859765	0.0633442	0.00818638	0.0178357	0.0068353	0.109374	0.607596	0.0355578
PcyM_0402500	12.8875	2.02088	0.693741	0.96201	0.0213442	10.2854	0.00171688	5.20071	2.81763	PVX_002575, replication factor C subunit 1, putative
PcyM_0402600	185.164	119.53	367.78	0.273444	0.640443	0.481426	8.84726	224.158	2.56064	PVX_002580, pseudouridine synthetase, putative
PcyM_0402700	199.026	243.586	84.357	13.4653	4.46852	0.148252	21.1326	175.656	9.80367	PVX_002595, hypothetical protein, conserved
PcyM_0402800	4.69451	156.5	1.89814	0.0794933	0.379209	0.120956	0.284961	54.3641	0.216155
PcyM_0402900	142.62	221.105	432.226	7.30178	7.32755	0.192399	8.20989	265.317	5.7579	PVX_002600, hypothetical protein, conserved
PcyM_0403000	10.0466	16.1155	4.13383	1.69675	1.13663	0.773107	1.81445	10.0987	1.35523
PcyM_0403100	1.42849	3.00483	0.133457	0.498392	0.45956	0.055335	0.191035	1.52226	0.30108
PcyM_0403200	155.381	105.757	206.375	4.68059	1.89409	0.464979	10.3998	155.837	4.35988
PcyM_0403300	81.0396	60.0466	90.597	5.90614	5.80918	20.6854	16.8456	77.2277	12.3116	PVX_002605, nuclear protein SkiP, putative
PcyM_0403400	10.4228	10.9617	6.10588	0.379091	0.34862	0.235882	0.217794	9.16345	0.295347	PVX_002610, hypothetical protein, conserved
PcyM_0403500	91.9666	96.3633	136.977	21.4393	8.27662	0.25266	19.6408	108.436	12.4023	PVX_002615, small nuclear ribonucleoprotein Sm D2, putative
PcyM_0403600	154.332	170.478	241.314	26.8434	12.3719	76.3972	60.8834	188.708	44.124	PVX_002620, DEAD/DEAH box helicase, putative
PcyM_0403700	198.473	114.278	312.851	0.378054	0.992349	6.97281	15.4973	208.534	5.96013	PVX_002625, rRNA methylase, putative
PcyM_0403800	15.4417	10.5758	45.9667	0.217975	2.05648	2.70607	0.370271	23.9948	1.3377	PVX_002630, hypothetical protein
PcyM_0403900	4.61734	3.01149	1.10656	0.872793	1.10221	2.1609	1.09548	2.9118	1.30785
PcyM_0404000	48.2359	53.1609	93.8777	4.08408	0.774641	5.75227	0.447149	65.0915	2.76454	PVX_002640, replication factor C subunit 2, putative
PcyM_0404100	2.8947	0.61308	0.56782	1.13713	0.108656	0.119413	0.201729	1.35853	0.391733	PVX_002645, hypothetical protein, conserved
PcyM_0404200	437.342	269.679	598.27	5.01895	3.87786	20.5353	1.17978	435.097	7.65297	PVX_002650, 40S ribosomal protein S26, putative (RPS26)
PcyM_0404300	61.6337	85.9512	89.9309	2.52883	0.336826	2.19285	11.0825	79.1719	4.03524	PVX_002655, hypothetical protein, conserved
PcyM_0404400	94.157	76.5839	66.6829	10.2296	3.21697	7.45893	34.9131	79.1412	13.9546	PVX_002660, hypothetical protein, conserved
PcyM_0404500	3.81551	8.6932	2.05621	0.0372131	0.0733932	0.11989	0.0528178	4.85497	0.0708285	PVX_002665, calcium-dependent protein kinase 1, putative (CDPK1)
PcyM_0404600	67.5628	86.3079	79.5572	0.189407	0.364063	0.801248	0.888296	77.8093	0.560753
PcyM_0404700	57.8334	37.8725	72.8729	4.86176	1.18591	6.18091	0.336695	56.1929	3.14132	PVX_002670, hypothetical protein, conserved
PcyM_0404800	46.1701	17.3309	50.6607	0.0660726	0.426434	0.0289503	0.51199	38.0539	0.258362	PVX_002675, AP-2 complex subunit sigma, putative
PcyM_0404900	606.876	627.431	657.265	17.4677	13.9189	17.233	19.2976	630.524	16.9793	PVX_002680, hypothetical protein, conserved
PcyM_0405000	85.1472	69.2847	42.2327	6.48391	0.261312	3.83512	0.218973	65.5548	2.69983	PVX_002685, ATP synthase alpha chain, putative
PcyM_0405100	37.7796	44.7794	15.6433	1.45738	4.77456	38.1988	14.9612	32.7341	14.848
PcyM_0405200	1.75482	6.62089	16.3085	0.0232259	0.0335051	0.0902159	0.00387788	8.22808	0.0377062	PVX_002695, hypothetical protein, conserved
PcyM_0405300	28.1919	7.43906	60.6615	0.0736306	4.16521	0.0265413	0.0729601	32.0975	1.08459	PVX_002700, hypothetical protein, conserved
PcyM_0405400	2.20629	2.73895	1.33644	0.53654	0.103737	0.0533067	0.0296088	2.09389	0.180798	PVX_002705, autophagy-related protein 11, putative (ATG11)
PcyM_0405500	2.1053	1.26702	0.914577	0.551669	0.145856	0.0537675	0.0265833	1.42897	0.194469
PcyM_0405600	8.51109	37.7271	108.48	7.92275	0.0542679	5.97924	0.0504089	51.5728	3.50167	PVX_002710, hypothetical protein, conserved
PcyM_0405700	3.43336	2.34005	8.66562	4.15173	0.0915441	0.395841	0.0298573	4.81301	1.16724	PVX_002715, hypothetical protein, conserved
PcyM_0405800	3.96508	1.05882	0.0539326	0.028079	0.00829893	0.0853708	0.0363166	1.69261	0.0395163	PVX_002720, vacuolar protein sorting-associated protein 45, putative
PcyM_0405900	56.5644	58.0021	178.44	5.57368	1.34657	23.0507	2.89787	97.6689	8.21719	PVX_002725, hypothetical protein, conserved
PcyM_0406000	41.6586	23.5799	8.97474	5.39597	1.33529	20.3467	0.731363	24.7378	6.95234
PcyM_0406100	88.9227	49.5421	0.996365	4.58862	0.507299	4.17792	2.62079	46.4871	2.97366	PVX_002730, hypothetical protein, conserved
PcyM_0406200	27.4059	30.8286	99.7473	0.0427452	0.0845059	2.82882	0.0959882	52.6606	0.763016	PVX_002735, hypothetical protein
PcyM_0406300	34.6355	21.7461	18.3105	8.0731	0.071782	0.37188	0.0787526	24.8973	2.14888	PVX_100845, hypothetical protein, conserved
PcyM_0406400	17.7647	5.0236	0.22398	0.0566555	0.167486	0.0449976	0.213652	7.67076	0.120698	PVX_002745, palmitoyltransferase, putative (DHHC11)
PcyM_0406500	14.8352	13.0487	51.0413	8.39297	2.40189	10.5417	0.00283788	26.3084	5.33484	PVX_002750, origin recognition complex subunit 5, putative (ORC5)
PcyM_0406600	0.37925	0.0786831	0.202508	0.0145547	0.0103165	0.0282745	0.0318032	0.220147	0.0212372	PVX_002755, DNA-directed RNA polymerase II subunit RPB2, putative (RPB2)
PcyM_0406700	21.1147	9.60538	107.183	0.0310433	0.138932	0.272768	0.108793	45.9677	0.137884	PVX_002760, hypothetical protein, conserved
PcyM_0406800	2.84427	43.8425	0.100029	0.028193	0.188457	0.0835047	0.0614265	15.5956	0.0903954	PVX_002765, hypothetical protein, conserved
PcyM_0406900	137.741	81.1271	75.8465	0.198046	0.107087	3.13498	4.47352	98.2383	1.97841	PVX_002770, hypothetical protein, conserved
PcyM_0407000	96.0594	9.67198	1.23403	0.314973	0.705735	0.23662	0.417244	35.6551	0.418643	PVX_002775, hypothetical protein, conserved
PcyM_0407100	6.95003	5.88246	5.39711	1.46448	1.82642	0.659537	2.03237	6.07653	1.4957
PcyM_0407200	22.4184	0.133723	0.472841	0.0405767	0.0105732	0.0678502	0.0849799	7.675	0.050995	PVX_002780, RING zinc finger protein, putative
PcyM_0407300	3.71927	9.00564	0.107418	0.016265	0.071402	0.0722847	0.0416141	4.27744	0.0503915	PVX_002785, ATP-dependent acyl-CoA synthetase, putative
PcyM_0407400	11.5606	9.13209	11.2061	0.76195	0.330778	2.80582	0.861806	10.6329	1.19009
PcyM_0407500	437.532	528.584	642.7	50.2735	30.299	5.98147	0.17764	536.272	21.6829
PcyM_0407600	7.55715	36.7507	31.4021	0.0185534	10.247	0.0189126	0.00439514	25.2366	2.57222	PVX_002795, hypothetical protein, conserved
PcyM_0407700	26.2339	140.925	210.568	0.0849761	0.0450148	0.00280142	0.014759	125.909	0.0368878
PcyM_0407800	7.2121	9.43619	5.60633	0.0899621	0.871663	8.72035	0.101987	7.41821	2.44599	PVX_002800, hypothetical protein, conserved
PcyM_0407900	0.17539	0.00590667	0.000719052	0.0121542	0.00165477	0.0177253	0.000993744	0.0606717	0.008132
PcyM_0408000	27.7289	5.38932	251.628	0.153083	0.412088	5.83497	0.018595	94.9155	1.60468	PVX_002810, hypothetical protein, conserved
PcyM_0408100	799.601	876.015	963.959	51.039	50.0582	26.1751	14.4704	879.858	35.4357	PVX_002815, hypothetical protein, conserved
PcyM_0408200	9.62177	19.6324	6.79101	0.0671408	0.0326991	5.59077	0.284547	12.015	1.49379	PVX_002820, hypothetical protein
PcyM_0408300	54.5037	52.8383	17.808	0.367277	0.410155	0.108084	0.939841	41.7167	0.456339	PVX_002825, 50S ribosomal protein L13, putative
PcyM_0408400	8.28872	3.69202	3.63711	0.50693	2.13166	0.427777	2.45893	5.20595	1.38132
PcyM_0408500	2.05833	4.32528	4.10964	0.0557253	0.0241249	0.0628229	0.0447959	3.49775	0.0468672	PVX_002830, protein transport protein SEC31, putative (SEC31)
PcyM_0408600	36.8665	40.0087	49.9266	1.83148	0.263542	0.420092	5.6356	42.2673	2.03768	PVX_002835, T-complex protein 1 subunit theta, putative (CCT8)
PcyM_0408700	0.964076	2.44005	5.19714	0.225216	0.0718838	0.087374	0.199363	2.86709	0.145959
PcyM_0408800	32.6256	48.2241	72.8808	1.37714	1.40455	0.148892	0.550403	51.2435	0.870245	PVX_002845, hypothetical protein, conserved
PcyM_0408900	5.19757	16.9342	0.292237	0.0921222	0.0916328	0.0486017	0.289296	7.47468	0.130413	PVX_002850, hypothetical protein, conserved
PcyM_0409000	0.305035	0.138173	0.00299036	0.00298303	0.0230542	0.0361538	0.0222689	0.148733	0.021115
PcyM_0409100	6.3332	0.353258	0.0758193	0.762048	0.155738	0.0537267	0.523202	2.25409	0.373679
PcyM_0409200	20.1327	0.642813	0.35949	9.78762	0.729681	0.33296	0.241839	7.04501	2.77303
PcyM_0409300	21.3525	18.0278	63.6453	3.55838	0.0605592	0.240231	0.0381965	34.3419	0.974343	PVX_002855, hypothetical protein, conserved
PcyM_0409400	82.4589	71.9945	71.1018	1.97727	2.12297	1.99967	3.49005	75.1851	2.39749	PVX_002860, hypothetical protein, conserved
PcyM_0409500	139.666	95.5715	175.96	1.03943	2.53459	1.47113	5.75359	137.066	2.69969	PVX_002865, serine/threonine protein kinase, putative
PcyM_0409600	25.0164	38.0838	30.5212	4.94321	0.762531	9.47132	9.92168	31.2071	6.27468	PVX_002867, conserved Plasmodium protein, unknown function
PcyM_0409700	343.46	420.137	413.346	13.9453	8.64795	16.8661	19.0115	392.314	14.6177	PVX_002870, hypothetical protein, conserved
PcyM_0409800	128.001	117.399	155.817	0.538124	0.0615019	0.14518	0.663548	133.739	0.352088	PVX_002875, protein SIS1, putative (SIS1); PVX_118690, 40 kDa heat shock protein, putative
PcyM_0409900	13.3956	2.94537	2.63462	0.11008	0.0402439	0.0182734	0.00739615	6.32521	0.0439984	PVX_002880, hypothetical protein, conserved
PcyM_0410000	18.2478	22.7664	54.2041	0.074378	0.058384	0.0984263	0.0471889	31.7394	0.0695943	PVX_002885, Leu/Phe-tRNA protein transferase, putative
PcyM_0410100	148.714	124.727	16.7054	0.0619945	0.928965	0.0190834	0.379211	96.7156	0.347314
PcyM_0410200	39.0237	57.3314	0.0313766	1.86771	15.018	0.127119	0.0275675	32.1288	4.26011
PcyM_0410300	154.328	206.382	247.729	0.855034	0.336022	1.29145	9.05463	202.813	2.88429	PVX_002895, SRR1-like protein
PcyM_0410400	359.568	256.898	692.081	42.8548	3.78463	0.143747	0.0316505	436.183	11.7037	PVX_002900, secreted protein with altered thrombospondin repeat domain, putative (SPATR)
PcyM_0410500	29.6557	35.4353	48.7149	3.883	1.72906	0.3582	2.59437	37.9353	2.14115	PVX_002905, hypothetical protein, conserved
PcyM_0410600	55.6746	70.575	67.4082	0.112311	2.38752	5.30285	1.70501	64.5526	2.37692
PcyM_0410700	1.25484	0.577561	8.18301	0.054095	0.0730191	0.097181	0.258743	3.33847	0.120759	PVX_002915, eukaryotic peptide chain release factor subunit 1, putative
PcyM_0410800	146.507	144.375	171.258	4.48459	0.318121	1.49918	4.48364	154.047	2.69638	PVX_002920, 50S ribosomal protein L7/L12, putative
PcyM_0410900	1.42845	1.36077	0.0573991	0.0169832	0.021276	0.0111797	0.00490224	0.948873	0.0135853	PVX_002925, hypothetical protein, conserved
PcyM_0411000	17.8441	4.11697	1.62906	0.698843	0.808839	0.267038	0.937306	7.86337	0.678007	PVX_002930, GDP-fucose transporter, putative
PcyM_0411100	511.284	597.369	964.309	37.8325	20.3492	5.51459	24.3447	690.987	22.0102	PVX_002935, hypothetical protein, conserved
PcyM_0411200	55.1223	106.422	98.328	1.93226	4.46826	0.817673	4.2316	86.6239	2.86245	PVX_002940, asparagine--tRNA ligase, putative
PcyM_0411300	9.55077	12.7468	34.1967	0.586919	0.0263172	0.196371	0.235334	18.8314	0.261235	PVX_002945, tyrosine kinase-like protein, putative (TKL1)
PcyM_0411400	17.7431	95.8098	307.624	2.65843	0.786931	0.061208	0.0803241	140.392	0.896723	PVX_002950, hypothetical protein, conserved
PcyM_0411500	20.3572	38.0267	129.62	0.163164	0.013865	0.936106	0.297855	62.6679	0.352748
PcyM_0411600	5.84074	13.6546	97.7745	0.0456072	0.636167	0.019481	0.00802826	39.0899	0.177321	PVX_002955, hypothetical protein, conserved
PcyM_0411700	128.043	105.696	342.584	0.201999	3.05057	14.3898	0.433329	192.108	4.51893	PVX_002960, beta-ketoacyl-acyl carrier protein synthase III precursor, putative
PcyM_0411800	86.3043	35.8858	37.7604	7.04032	10.2581	4.39084	12.7407	53.3169	8.60748	PVX_002965, ubiquinol-cytochrome-c reductase complex assembly factor 1, putative
PcyM_0411900	50.7242	53.176	139.703	3.23665	1.24311	4.51483	3.38709	81.201	3.09542	PVX_002970, ras-related protein Rab-5A, putative (RAB5a)
PcyM_0412000	30.7949	14.6301	57.7197	3.32396	1.4061	0.0170026	0.70523	34.3816	1.36307	PVX_002975, hypothetical protein, conserved
PcyM_0412200	12.1262	17.1521	14.3144	1.17341	1.00226	0.848488	0.117294	14.5309	0.785364	PVX_003995, hypothetical protein, conserved
PcyM_0412300	6.97125	9.59476	12.7899	1.62134	4.52888	1.61113	3.03875	9.7853	2.70002
PcyM_0412400	23.695	14.9043	0.120251	0.029694	0.108991	0.154084	0.0421312	12.9065	0.083725	PVX_003990, hypothetical protein, conserved
PcyM_0412500	53.2094	60.6012	76.923	3.0523	1.70272	1.82324	11.6231	63.5779	4.55033	PVX_253300, unspecified product
PcyM_0412600	2.38294	4.10946	0.0902741	0.288549	0.443432	0.0332766	0.0925782	2.19422	0.214459	PVX_003980, hypothetical protein, conserved
PcyM_0412700	2.55755	0.529802	6.16006	0.0622367	0.0304758	0.229035	0.00210389	3.08247	0.0809629	PVX_003975, hypothetical protein, conserved
PcyM_0412800	115.267	95.9986	95.4425	5.58506	4.79964	9.68479	0.0368616	102.236	5.02659	PVX_003970, 50S ribosomal protein L33, putative
PcyM_0412900	72.127	52.6268	0.78809	11.317	1.88032	0.280589	1.11622	41.8473	3.64854	PVX_003965, monocarboxylate transporter, putative
PcyM_0413000	28.232	40.2788	19.5394	3.76984	0.863902	0.0526397	0.345092	29.3501	1.25787	PVX_003960, hypothetical protein, conserved
PcyM_0413100	7.99891	5.45132	0.967235	0.0680252	0.221648	0.488788	0.220149	4.80582	0.249653	PVX_003955, 60S ribosomal protein L37a, putative
PcyM_0413200	65.4491	17.309	23.0437	0.353367	0.491245	1.13692	0.253447	35.2673	0.558745	PVX_003950, transport protein SEC61 gamma subunit, putative
PcyM_0413300	3.81906	0.0167034	31.5291	0.02479	0.794354	0.0487577	0.0296072	11.7883	0.224377	PVX_003945, ATP-dependent RNA helicase UAP56, putative (UAP56)
PcyM_0413400	1.42079	1.25132	0.0301054	0.0557708	0.108645	0.0493981	0.019296	0.900738	0.0582776	PVX_003940, RING zinc finger protein, putative
PcyM_0413500	11.6765	5.99957	8.68505	11.2484	0.359177	0.035063	1.17309	8.78704	3.20393	PVX_003935, amine transporter, putative
PcyM_0413600	54.6393	28.493	1.2594	0.426314	3.44981	0.52157	0.182623	28.1306	1.14508	PVX_003930, hypothetical protein
PcyM_0413700	1.2292	3.98667	23.4907	0.249171	0.0894438	0.0077284	0.0346576	9.56886	0.0952503
PcyM_0413800	45.5004	29.9286	33.1652	0.0745238	3.89126	8.39566	1.1254	36.1981	3.37171	PVX_003925, hypothetical protein, conserved
PcyM_0413900	367.327	264.525	709.647	18.4466	22.6319	28.5834	37.3976	447.166	26.7649	PVX_003920, 2C-methyl-D-erythritol 2,4-cyclodiphosphate synthase, putative (IspF)
PcyM_0414000	34.6569	32.7159	95.5862	1.2813	1.72323	0.525458	0.128676	54.3197	0.914665	PVX_003915, hypothetical protein, conserved
PcyM_0414100	17.462	40.9331	118.74	0.75431	0.0198225	0.00989809	0.0312813	59.0451	0.203828	PVX_003910, phospholipase A2, putative
PcyM_0414200	11.6173	74.6463	76.1856	1.3289	44.7349	0.847949	0.475513	54.1497	11.8468
PcyM_0414300	0.246146	1.83912	0.00332308	0.0160678	0.0337844	0.0572279	0.0443347	0.696196	0.0378537	PVX_003905, 6-cysteine protein
PcyM_0414400	0.261603	0.0146907	0.457286	0.8058	0.0217902	0.033056	0.010996	0.244527	0.217911	PVX_003900, 6-cysteine protein
PcyM_0414500	5.32261	3.47668	0.174282	0.0950688	0.1044	0.0561195	0.0508694	2.99119	0.0766145
PcyM_0414600	0.0897025	0.959708	0.313651	0.0845424	0.136373	0.147086	0.0478648	0.454354	0.103967
PcyM_0414700	95.5031	282.256	114.379	6.82581	3.28197	9.11007	4.60925	164.046	5.95678
PcyM_0414800	32.8225	22.017	63.7742	0.373981	0.312475	0.401039	1.68954	39.5379	0.694259	PVX_003885, ribosome-recycling factor, putative (RRF1)
PcyM_0414900	532.069	522.253	922.129	20.8937	10.7462	21.0619	7.52602	658.817	15.0569
PcyM_0415000	419.778	375.972	636.334	16.691	11.2968	16.5313	2.88332	477.361	11.8506	PVX_003880, acyl carrier protein, putative (ACP)
PcyM_0415100	112.511	37.3393	3.2411	0.146538	0.23332	0.063586	0.17219	51.0305	0.153909
PcyM_0415200	5.0966	5.97669	24.4279	0.522655	0.00963716	0.0909174	0.0333338	11.8337	0.164136	PVX_003870, hypothetical protein, conserved
PcyM_0415300	260.833	238.179	353.463	11.7365	13.7202	35.9314	19.5351	284.158	20.2308	PVX_003865, hypothetical protein, conserved
PcyM_0415400	11.4391	23.251	53.5886	2.97145	0.805239	2.008	0.0745426	29.4262	1.46481	PVX_003860, KRR1 small subunit processome component, putative (KRR1)
PcyM_0415500	10.4922	4.05389	9.46738	5.20314	0.0491243	0.789512	0.0494069	8.00448	1.52279	PVX_003855, hypothetical protein, conserved
PcyM_0415600	4.80779	2.15391	0.580092	3.53993	0.881228	1.29417	2.37118	2.51393	2.02162
PcyM_0415700	0.643135	0.387611	13.7416	0.0423371	0.0625389	0.00824151	0.0259214	4.92412	0.0347597
PcyM_0415800	0.21028	0.583754	0.137628	0.174928	0.246142	0.327055	0.0647294	0.310554	0.203214
PcyM_0415900	1.3224	5.50339	0.46247	0.490609	23.358	0.503487	0.300986	2.42942	6.16327
PcyM_0416000	0.0551063	0.0519332	0.0207133	0.0124607	0.0460996	0.0605921	0.0736733	0.0425843	0.0482064	PVX_003795, serine-repeat antigen (SERA); PVX_003805, serine-repeat antigen (SERA), putative; PVX_003810, serine-repeat antigen 5 (SERA), putative; PVX_003820, serine-repeat antigen 4 (SERA), putative; PVX_003825, serine-repeat antigen 4 (SERA); PVX_003830, serine-repeat antigen 5 (SERA); PVX_003835, serine-repeat antigen 1 (SERA); PVX_003840, serine-repeat antigen 3 (SERA); PVX_003845, serine-re…
PcyM_0416100	0.89567	0.212821	22.6886	0.827389	0.518115	0.0415838	0.30148	7.93236	0.422142
PcyM_0416200	55.7661	63.6478	392.055	28.3323	0.700692	8.9348	25.3599	170.49	15.8319	PVX_003795, serine-repeat antigen (SERA); PVX_003805, serine-repeat antigen (SERA), putative; PVX_003810, serine-repeat antigen 5 (SERA), putative; PVX_003820, serine-repeat antigen 4 (SERA), putative; PVX_003825, serine-repeat antigen 4 (SERA); PVX_003830, serine-repeat antigen 5 (SERA); PVX_003835, serine-repeat antigen 1 (SERA); PVX_003840, serine-repeat antigen 3 (SERA); PVX_003845, serine-re…
PcyM_0416300	24.3149	51.7741	226.955	0.100365	7.8398	0.161142	0.618366	101.015	2.17992	PVX_003795, serine-repeat antigen (SERA); PVX_003805, serine-repeat antigen (SERA), putative; PVX_003810, serine-repeat antigen 5 (SERA), putative; PVX_003820, serine-repeat antigen 4 (SERA), putative; PVX_003825, serine-repeat antigen 4 (SERA); PVX_003830, serine-repeat antigen 5 (SERA); PVX_003835, serine-repeat antigen 1 (SERA); PVX_003840, serine-repeat antigen 3 (SERA); PVX_003845, serine-re…
PcyM_0416400	11.2896	0.375024	0.618531	0.265212	0.423551	0.0438705	0.194876	4.09437	0.231877
PcyM_0416500	37.1591	35.4098	75.021	0.207899	0.487264	2.92317	0.558951	49.1966	1.04432	PVX_003795, serine-repeat antigen (SERA); PVX_003805, serine-repeat antigen (SERA), putative; PVX_003810, serine-repeat antigen 5 (SERA), putative; PVX_003820, serine-repeat antigen 4 (SERA), putative; PVX_003825, serine-repeat antigen 4 (SERA); PVX_003830, serine-repeat antigen 5 (SERA); PVX_003835, serine-repeat antigen 1 (SERA); PVX_003840, serine-repeat antigen 3 (SERA); PVX_003845, serine-re…
PcyM_0416600	23.4027	26.6356	21.4133	0.565588	1.8659	0.27751	5.60875	23.8172	2.07944	PVX_003795, serine-repeat antigen (SERA); PVX_003805, serine-repeat antigen (SERA), putative; PVX_003810, serine-repeat antigen 5 (SERA), putative; PVX_003820, serine-repeat antigen 4 (SERA), putative; PVX_003825, serine-repeat antigen 4 (SERA); PVX_003830, serine-repeat antigen 5 (SERA); PVX_003835, serine-repeat antigen 1 (SERA); PVX_003840, serine-repeat antigen 3 (SERA); PVX_003845, serine-re…
PcyM_0416700	0.397944	0.339536	0.0273596	0.00838533	0.035355	0.078024	0.0343937	0.254946	0.0390395	PVX_003795, serine-repeat antigen (SERA); PVX_003805, serine-repeat antigen (SERA), putative; PVX_003810, serine-repeat antigen 5 (SERA), putative; PVX_003820, serine-repeat antigen 4 (SERA), putative; PVX_003825, serine-repeat antigen 4 (SERA); PVX_003830, serine-repeat antigen 5 (SERA); PVX_003835, serine-repeat antigen 1 (SERA); PVX_003840, serine-repeat antigen 3 (SERA); PVX_003845, serine-re…
PcyM_0416800	0.0325328	0.161701	0.0158761	0.012938	0.0709661	0.00575025	0.0452242	0.0700365	0.0337196
PcyM_0416900	0.251442	5.08534	6.09505	0.0446025	0.0342177	0.0416311	0.282508	3.81061	0.10074
PcyM_0417000	0.214861	0.290658	2.20185	0.105061	0.20187	0.316506	0.142684	0.902456	0.19153
PcyM_0417100	0.0368153	0.053191	0.0207985	0.0297189	0.0447102	0.0574636	0.177339	0.0369349	0.0773079	PVX_003795, serine-repeat antigen (SERA); PVX_003805, serine-repeat antigen (SERA), putative; PVX_003810, serine-repeat antigen 5 (SERA), putative; PVX_003820, serine-repeat antigen 4 (SERA), putative; PVX_003825, serine-repeat antigen 4 (SERA); PVX_003830, serine-repeat antigen 5 (SERA); PVX_003835, serine-repeat antigen 1 (SERA); PVX_003840, serine-repeat antigen 3 (SERA); PVX_003845, serine-re…
PcyM_0417200	0.0576865	0.077915	0.0548979	0.0131046	0.0202826	0.113655	0.0884782	0.0634998	0.0588802	PVX_003795, serine-repeat antigen (SERA); PVX_003805, serine-repeat antigen (SERA), putative; PVX_003810, serine-repeat antigen 5 (SERA), putative; PVX_003820, serine-repeat antigen 4 (SERA), putative; PVX_003825, serine-repeat antigen 4 (SERA); PVX_003830, serine-repeat antigen 5 (SERA); PVX_003835, serine-repeat antigen 1 (SERA); PVX_003840, serine-repeat antigen 3 (SERA); PVX_003845, serine-re…
PcyM_0417300	0.129071	0.058633	13.4168	0.0191177	0.00882651	0.0260019	0.093514	4.53482	0.036865	PVX_003800, serine-repeat antigen (SERA)
PcyM_0417400	2.00172	0.0339493	0.0253805	0.00324617	0.00759514	1.13128	0.00399309	0.687015	0.286529
PcyM_0417500	3.27599	0.26784	0.071302	0.158993	6.62266	0.0513038	0.225603	1.20504	1.76464
PcyM_0417600	9.90384	7.28758	4.35623	1.68624	1.50819	0.787622	1.97577	7.18255	1.48946	PVX_003785, iron-sulfur cluster assembly accessory protein, putative; PVX_080115, iron-sulfur cluster assembly accessory protein, putative (SufA)
PcyM_0417700	17.8268	16.2449	19.0336	0.138602	1.16273	1.60326	2.45697	17.7018	1.34039	PVX_003780, hypothetical protein, conserved
PcyM_0417800	11.8984	2.8732	3.21948	0.0551649	0.177243	0.443816	0.32102	5.99701	0.249311
PcyM_0417900	5.41877	0.704511	18.7859	0.153597	1.13932	0.314017	0.526285	8.30305	0.533304	PVX_003770, merozoite surface protein 5
PcyM_0418000	1.84902	34.2958	86.8853	50.8169	48.5102	2.8917	55.5976	41.01	39.4541	PVX_003765, adenylosuccinate lyase (ASL)
PcyM_0418100	2.93036	3.47691	0.606427	0.351494	0.764393	0.564963	0.785347	2.3379	0.616549
PcyM_0418200	61.5951	41.9023	48.232	12.5929	3.33288	0.253811	0.596195	50.5764	4.19395	PVX_003760, transcription factor, putative
PcyM_0418300	233.476	355.071	617.956	81.6455	10.1661	0.574146	9.25499	402.168	25.4102
PcyM_0418400	6.56873	4.13714	0.0823851	1.11398	0.163386	0.0347461	0.0678992	3.59609	0.345004	PVX_003755, hypothetical protein, conserved
PcyM_0418500	14.2653	27.7374	33.0027	0.0447145	0.210415	1.96746	0.0167334	25.0018	0.55983	PVX_003750, pentafunctional AROM polypeptide, putative (AROM)
PcyM_0418600	1.29227	21.71	0.342744	0.338641	0.457449	0.293808	0.66366	7.78168	0.438389
PcyM_0418700	11.0748	11.6471	1.21699	0.0646331	0.120031	0.0977199	0.136329	7.97963	0.104678	PVX_003745, pantothenate transporter, putative (PAT)
PcyM_0418800	16.2393	21.549	4.5181	0.336282	0.0738312	0.188432	0.114502	14.1021	0.178262	PVX_003740, cysteine desulfuration protein SufE, putative (SufE)
PcyM_0418900	54.6662	13.8701	53.2017	8.15151	2.28415	0.166417	2.92241	40.5793	3.38112	PVX_003735, DNA repair protein RAD2, putative (RAD2)
PcyM_0419000	138.046	122.048	204.971	4.50391	6.29217	0.651114	6.37559	155.022	4.4557	PVX_003730, 26S proteasome regulatory subunit RPN1, putative (RPN1)
PcyM_0419100	333.909	427.354	205.981	23.107	22.1722	1.49294	0.292209	322.415	11.7661	PVX_003725, PH domain containing protein
PcyM_0419200	345.06	391.286	398.038	15.7508	16.7042	10.5409	8.17801	378.128	12.7935	PVX_003720, hypothetical protein, conserved
PcyM_0419300	3.41744	0.758406	0.0631015	0.00527822	0.0530789	0.0366256	0.0070593	1.41298	0.0255105
PcyM_0419400	195.042	280.552	718.19	20.534	2.9929	2.30286	49.6986	397.928	18.8821	PVX_003700, hypothetical protein, conserved
PcyM_0419500	13.723	142.007	0.255518	4.063	0.103324	1.63718	0.304838	51.9951	1.52709	PVX_003695, hypothetical protein, conserved
PcyM_0419600	1.31166	1.71105	0.345935	0.194004	0.672422	0.181695	0.493954	1.12288	0.385519
PcyM_0419700	17.3606	6.73474	45.5834	0.0642727	0.0549967	0.160497	0.00240282	23.2263	0.0705423	PVX_003685, hypothetical protein
PcyM_0419800	6.7056	8.62192	25.1844	0.05683	0.117855	0.0872928	0.0388835	13.504	0.0752153
PcyM_0419900	5.93167	17.0583	0	0.0222483	0.0858231	0.399004	0.017649	7.66333	0.131181
PcyM_0420000	11.2076	14.6766	8.66215	7.90845	0.751141	1.3372	0.475073	11.5155	2.61796	PVX_003670, 3'-5' exonuclease domain containing protein
PcyM_0420100	15.9818	88.6599	0.140153	7.33769	0.406951	0.29697	2.46866	34.9273	2.62757	PVX_003665, hexose transporter
PcyM_0420200	8.33439	0.39778	156.46	0.02783	0.0208496	0.151406	0.0573683	55.0642	0.0643636	PVX_003660, 5'-3' exoribonuclease, putative
PcyM_0420300	0.844801	1.47415	0.267259	0.0351782	0.0571605	0.012892	0.00103921	0.862071	0.0265675
PcyM_0420400	0.919859	2.65964	1.33372	0.266567	0.439479	0.205271	0.0832003	1.63774	0.248629
PcyM_0420500	0.499231	0.0138966	0.0162541	2.62391	0.0383964	0.00535985	0.0396937	0.176461	0.676841	PVX_003645, hypothetical protein, conserved
PcyM_0420600	320.836	273.063	476.985	17.7119	13.5832	0.313715	6.88677	356.961	9.62389
PcyM_0420700	217.357	187.427	258.687	9.09215	2.87367	11.1995	0.0657965	221.157	5.80777	PVX_003640, hypothetical protein, conserved
PcyM_0420800	146.489	0.759776	0.499698	8.28786	0.523184	0.518503	0.319289	49.2495	2.41221
PcyM_0420900	2.09713	2.22296	28.2737	0.00996811	0.0120623	0.0417237	0.000371548	10.8646	0.0160314
PcyM_0421000	19.0413	16.1048	0.0367522	0.0228987	0.0255191	0.0291115	0.0202715	11.7276	0.0244502	PVX_003630, hypothetical protein, conserved
PcyM_0421100	1.9871	4.4992	0.442916	0.107076	0.0369382	0.7584	0.0185923	2.30974	0.230252	PVX_003625, 5'-3' exonuclease, N-terminal resolvase-like domain, putative
PcyM_0421200	3.42767	16.916	42.0817	0.0170091	4.69747	0.114955	0.0384457	20.8084	1.21697	PVX_003620, hypothetical protein, conserved
PcyM_0421300	8.147	0.0651862	0.0294372	0.267138	0.00927845	0	0.00501361	2.74721	0.0703576
PcyM_0421400	8.73257	0.599396	1.01899	0.132383	0.436387	0.241798	0.215721	3.45032	0.256572	PVX_003610, hypothetical protein, conserved
PcyM_0421500	2.97036	3.51599	0.577877	1.30774	2.66161	5.41305	1.2637	2.35474	2.66152
PcyM_0421600	2.46339	4.96375	0.132989	0.0926903	0.0565668	0.259615	0.0912386	2.52004	0.125028	PVX_003605, hypothetical protein, conserved
PcyM_0421700	398.285	362.526	932.393	10.9424	4.42903	8.21796	11.9728	564.401	8.89056	PVX_003600, ERCC1 nucleotide excision repair protein, putative
PcyM_0421800	7.81853	9.96527	9.64228	2.65003	0.0291846	0.234039	0.0199425	9.14202	0.733298	PVX_003595, hypothetical protein, conserved
PcyM_0421900	17.8538	22.2506	0.0692829	8.02916	0.200382	0.00208459	0.0144026	13.3912	2.06151
PcyM_0422000	23.9243	20.4132	12.9302	1.60398	1.88086	0.816727	2.70443	19.0892	1.7515	PVX_003585, repetitive organellar protein, putative (ROPE)
PcyM_0422100	55.9753	58.9601	1.26686	3.51952	1.92422	0.264427	0.00427131	38.7341	1.42811	PVX_003580, palmitoyltransferase, putative (DHHC12)
PcyM_0422200	4.98606	24.8209	0.119039	0.132918	0.262339	0.146334	0.202107	9.97534	0.185925
PcyM_0422300	198.305	157.431	347.649	71.7556	19.8621	48.6766	105.722	234.462	61.5041	PVX_003575, octaprenyl pyrophosphate synthase, putative (OPP)
PcyM_0422400	13.1246	17.316	58.4981	0.118319	0.184146	8.26167	0.0794642	29.6463	2.1609
PcyM_0422500	0.266056	0.147436	0.185709	0.442742	0.852313	1.23921	1.18166	0.199734	0.928981	PVX_003565, early transcribed membrane protein (ETRAMP)
PcyM_0422600	0.976806	0.385222	0.161866	0.212079	0.172197	0.738512	0.325071	0.507965	0.361965	PVX_003560, hypothetical protein
PcyM_0422700	1.50095	3.84334	0.573806	0.104869	0.28806	0.663369	0.786576	1.9727	0.460719	PVX_003555, Plasmodium exported protein, unknown function
PcyM_0422800	1.32147	4.10045	0.577032	0.657191	1.6959	0.291346	0.601982	1.99965	0.811605
PcyM_0422900	0.00539507	0.0496901	0.0276196	0.0340848	0.00843912	0.135112	0.0595723	0.0275683	0.0593021	PVX_003545, Plasmodium exported protein, unknown function
PcyM_0423000	0.236706	0.300722	0.144214	0.0522147	0.0475805	0.0679454	0.160423	0.227214	0.0820409	PVX_003540, Plasmodium exported protein (PHISTc), unknown function
PcyM_0423100	0.0221213	0.0384553	0.0169945	0.00335703	0.0827896	0.00477807	0.0580063	0.025857	0.0372328
PcyM_0423200	0.545675	0.45545	0.213099	0.295689	0.113263	0.487029	0.700493	0.404742	0.399119
PcyM_0423300	0.0656628	0.132071	0.0642419	0.161066	0.364129	0.272384	0.209969	0.0873254	0.251887	PVX_003530, hypothetical protein
PcyM_0423400	0.792113	0.432619	0.525364	0.134262	0.170084	0.236946	0.225464	0.583365	0.191689	PVX_003525, Plasmodium exported protein, unknown function
PcyM_0423500	0.141439	0.0647037	0.00818537	0.0150685	0.0222074	0.0307541	0.0747925	0.0714426	0.0357056	PVX_003520, knob-associated histidine-rich protein, putative (KAHRP)
PcyM_0423600	5.928	15.6518	1.96846	2.12435	6.53534	5.05784	3.73517	7.84944	4.36318	PVX_003515, Phist protein (Pf-fam-b)
PcyM_0423700	0.0120729	0.0256524	0.0131859	0.0360984	0.0962713	0.130265	0.00514218	0.0169704	0.0669441	PVX_094275, hypothetical protein
PcyM_0423800	2.25793	6.81458	3.40812	1.91459	2.6858	0.995228	3.06596	4.16021	2.1654
PcyM_0423900	0.128524	0.274101	0.698869	0.0257843	0.0538408	0.0331477	0.00592392	0.367165	0.0296742
PcyM_0424000	0.0194012	0.0239523	0.0121306	0.0227655	0.0379004	0.0936634	0.0487462	0.0184947	0.0507689	PVX_090325, reticulocyte binding protein 2c (RBP2c); PVX_094255, reticulocyte binding protein 2b (RBP2b); PVX_101495, reticulocyte binding protein 3, pseudogene (RBP3); PVX_101585, reticulocyte binding protein 2 precursor, pseudogene, putative; PVX_121920, reticulocyte binding protein 2a (RBP2a)
PcyM_0424100	0.0291593	0.0376088	0.0322852	0.00671519	0.00972053	0.04465	0.0740261	0.0330178	0.0337779
PcyM_0424200	0.741952	0.931493	0.0671653	0.283566	0.428165	0.152184	0.2406	0.580203	0.276129
PcyM_0424300	0.236345	0.460525	0.533896	0.0782744	0.476854	0.0602379	0.0336853	0.410256	0.162263
PcyM_0424400	0.197748	0.195672	0.0299898	0.0453989	0.206549	0.0204817	0.0308802	0.141137	0.0758274
PcyM_0424500	7.33379	5.6633	0.882147	1.75269	1.93439	1.58921	1.56683	4.62641	1.71078	PVX_094240, variable surface protein Vir12/24-related
PcyM_0424600	7.36339	11.9141	18.479	1.64086	1.21797	2.22172	9.16103	12.5855	3.5604	PVX_003475, hypothetical protein, conserved; PVX_094230, hypothetical protein
PcyM_0424700	18.7131	1.55402	5.19582	0.532616	1.35428	1.16717	0.287238	8.48764	0.835326
PcyM_0424800	0.0821927	0.28404	0.163885	0.075031	0.220618	0.278649	0.0410877	0.176706	0.153846
PcyM_0424900	2.54613	1.25278	0.119281	0.126105	0.367718	0.180282	1.16538	1.30606	0.459871
PcyM_0425000	0.649682	1.09319	0.0816192	0.224966	0.705889	0.306475	0.0968786	0.608165	0.333552
PcyM_0425100	0.289626	1.06374	0.237174	0.155046	0.221282	0.287314	0.124094	0.53018	0.196934
PcyM_0425200	0.456646	1.37708	0.13114	0.189273	1.00189	0.188636	0.0623426	0.654954	0.360537
PcyM_0425300	0.0390788	0.0392615	0.00443376	0.00960453	0.0315087	0.0100185	0.0505853	0.0275913	0.0254293
PcyM_0425400	0.553893	0.272043	0.0584541	0.0498365	0.0848829	0.0110134	0.0523626	0.294797	0.0495238
PcyM_0425500	0.764094	1.81502	0.510144	0.226066	0.146817	0.0501812	0.394919	1.02975	0.204496
PcyM_0425600	0.907433	1.16877	0.0794197	0.342696	0.826439	0.203608	0.0910841	0.71854	0.365957
PcyM_0500100	0.618085	1.20194	0.180918	0.323487	0.790196	0.168295	0.225359	0.666981	0.376835
PcyM_0500200	0.0281916	0.34631	0.1025	0.0495649	0.050514	0	0.0978989	0.159	0.0494944
PcyM_0500300	0.815174	1.56018	0.40533	0.311868	0.468896	0.317849	0.886701	0.926894	0.496329
PcyM_0500400	0.910452	1.57937	0.556668	0.297832	0.296565	0.204768	0.440279	1.0155	0.309861
PcyM_0500500	0.556016	1.00649	0.983782	0.155225	0.365285	0.0886122	0.0820387	0.848762	0.17279
PcyM_0500600	2.48804	0.860784	1.48123	0.688372	0.806465	1.07869	0.788684	1.61002	0.840552	PVX_096937, VIR protein, pseudogene
PcyM_0500700	2.09226	26.5454	37.573	9.60886	9.48297	4.35647	18.4791	22.0702	10.4818
PcyM_0500800	0.771444	1.21123	0.0963283	0.354362	0.315882	0.216395	0.0305457	0.692999	0.229296
PcyM_0500900	0.207649	0.380088	0.244323	0.0926369	0.0887138	0.0334654	0.0578683	0.277353	0.0681711
PcyM_0501000	0.40497	0.786457	0.749365	0.471042	0.776289	0.671264	0.908043	0.646931	0.70666	PVX_109785, unspecified product
PcyM_0501100	0.06358	0.153132	0.0912105	0.0471744	0.050455	0.0866813	0.038176	0.102641	0.0556217	PVX_004495, VIR protein
PcyM_0501200	0.0604275	0.333093	0.00561019	0.0442397	0.199278	0.0491204	0.181529	0.133043	0.118542
PcyM_0501300	2.37589	7.92129	0.52294	0.905246	2.06	0.598904	1.04024	3.60671	1.1511	PVX_000015, Pv-fam-d protein
PcyM_0501400	0.0879214	0.199034	0.0261409	0.0507574	0.140939	0.101307	0.129006	0.104366	0.105502	PVX_088775, VIR protein
PcyM_0501500	0.0589498	0.0426345	0.0217994	0.0187731	0.00399068	0.0570943	0.00955099	0.0411279	0.0223523
PcyM_0501600	0.988854	0.749966	0.256513	0.292815	0.754042	0.534046	0.176986	0.665111	0.439473	PVX_088790, variable surface protein Vir21-like
PcyM_0501700	0.0950457	0.174177	0.109731	0.0413967	0.126545	0.0179345	0.00495809	0.126318	0.0477085
PcyM_0501800	1.56632	4.65327	1.13711	0.336211	1.07052	0.462502	2.11448	2.45223	0.995929
PcyM_0501900	7.71727	16.0785	10.2566	10.6084	6.60818	3.86489	4.48034	11.3508	6.39045	PVX_088810, tryptophan-rich antigen (Pv-fam-a)
PcyM_0502000	0.0321892	0.0286986	0.0701528	0.0106401	0.0549725	0.00722164	0.0122967	0.0436802	0.0212827
PcyM_0502100	3.43932	0.414546	0.0865917	0.0891146	0.0996959	0.106274	0.798523	1.31349	0.273402
PcyM_0502200	0.0500116	0.0751701	0.0383214	0.026169	0.00648188	0.0239415	0.0127203	0.0545011	0.0173282
PcyM_0502300	0.477363	0.0312683	0.00892732	0.012941	0.0504271	0.0274527	0.0341393	0.17252	0.03124
PcyM_0502400	5.29588	45.6932	52.822	15.0118	20.8857	10.0396	40.7129	34.6037	21.6625	PVX_088835, hypothetical protein, conserved
PcyM_0502500	0.102277	0.284314	0.0746099	0.134403	0.182757	0.414952	0.342331	0.153734	0.26861	PVX_088840, Phist protein (Pf-fam-b)
PcyM_0502600	0.596777	7.30401	0.371581	2.46728	0.71989	0.372409	0.242535	2.75745	0.950528	PVX_088845, Plasmodium exported protein, unknown function
PcyM_0502700	0.149478	0.050092	3.66756	0.054844	0.00803081	0.0640118	0.0940899	1.28905	0.0552441	PVX_088850, tryptophan-rich antigen (Pv-fam-a)
PcyM_0502800	0.142946	0.161392	0.0523809	0.0539384	0.0897413	0.0912842	0.0736186	0.118906	0.0771456	PVX_088855, hypothetical protein, conserved
PcyM_0502900	6.09783	5.05343	10.4607	1.42902	2.43992	0.0821666	1.26048	7.20398	1.3029	PVX_088860, sporozoite invasion-associated protein 2, putative (SIAP2)
PcyM_0503000	1636.43	2483.33	641.46	113.935	83.6095	154.087	34.8972	1587.07	96.6321
PcyM_0503100	2056.84	3322.51	998.339	207.818	176.565	349.966	81.6699	2125.9	204.005
PcyM_0503200	1862.53	6375.46	1732.11	280.456	191.281	513.051	138.78	3323.37	280.892	PVX_088865, Senescence-associated protein, putative
PcyM_0503300	3.20783	3.47523	0.5263	0.0762758	0.243056	0.65437	0.316938	2.40312	0.32266
PcyM_0503400	1878.71	1251.54	402.455	84.0295	55.0593	65.7864	11.937	1177.57	54.2031
PcyM_0503500	1605.95	841.367	162.25	83.2912	49.6157	20.0789	25.2564	869.857	44.5605
PcyM_0503600	57.2652	91.4675	66.446	6.61764	6.20871	18.7564	14.3822	71.7262	11.4913	PVX_088870, early transcribed membrane protein (ETRAMP)
PcyM_0503700	1.69311	4.24277	78.6357	0.0886958	0.922881	5.63396	0.178641	28.1905	1.70604	PVX_088875, hypothetical protein
PcyM_0503800	29.1174	15.2325	31.3361	0.632073	0.635872	0.274557	5.11637	25.2287	1.66472	PVX_088880, prolyl 4-hydroxylase subunit alpha, putative
PcyM_0503900	131.061	220.735	51.6667	8.56147	3.69815	0.563281	0.635012	134.488	3.36448	PVX_088885, U6 snRNA-associated Sm-like protein LSm8, putative
PcyM_0504000	7.71539	2.06357	1431.27	0.459311	1.15324	0.109508	2.09665	480.35	0.954677	PVX_088890, prohibitin, putative
PcyM_0504100	6.8651	0.468108	35.7438	1.18409	0.187102	0.578956	0.662555	14.359	0.653175	PVX_088895, hypothetical protein, conserved
PcyM_0504200	6.48725	1.81982	0.0376477	0.0219633	0.020357	0.0343382	17.8744	2.78157	4.48776	PVX_088905, hypothetical protein, conserved
PcyM_0504300	1.92239	0.471703	7.12318	0.0759834	0.11425	0.208585	0.158934	3.17243	0.139438	PVX_088907, hypothetical protein
PcyM_0504400	1.26789	3.13043	1.01792	0.757304	0.711176	0.724407	1.28412	1.80541	0.869251
PcyM_0504500	1.00724	0.0612805	1.38222	0.0375364	0.215172	0.0548582	0.0532614	0.816916	0.090207	PVX_088915, hypothetical protein, conserved
PcyM_0504600	0.205631	0.266912	0.0551608	0.0940284	0.160129	0.198144	0.173008	0.175901	0.156328	PVX_088920, folate transporter 1, putative (FT1)
PcyM_0504700	61.1789	51.5053	3.11533	5.97096	0.464964	0.168092	0.0184005	38.5998	1.6556	PVX_088930, translation initiation factor EIF-2b alpha subunit, putative
PcyM_0504800	20.1761	58.4616	0.787906	16.8884	0.456242	0.0307764	0.128756	26.4752	4.37604	PVX_088935, mitochondrial inner membrane protein OXA1, putative (OXA1)
PcyM_0504900	103.921	121.734	121.005	2.37168	2.65021	6.18959	22.5331	115.554	8.43614	PVX_088940, hypothetical protein, conserved
PcyM_0505000	376.302	330.599	545.349	5.76157	2.22883	47.1154	8.41732	417.416	15.8808	PVX_088945, leucine--tRNA ligase, putative
PcyM_0505100	24.6834	71.2035	159.519	3.42035	0.128797	0.128345	0.190544	85.1352	0.967009	PVX_088950, hypothetical protein, conserved
PcyM_0505200	108.373	117.18	73.6731	16.9091	1.95345	0.713461	0.36479	99.7419	4.9852	PVX_088955, rhomboid protease ROM3, putative (ROM3)
PcyM_0505300	666.24	583.375	1004.97	22.1568	11.2733	22.9055	25.2268	751.529	20.3906	PVX_088960, protein disulfide isomerase, putative
PcyM_0505400	4.83974	3.63135	3.86246	0.0143234	0.196542	0.0153027	0.0356842	4.11118	0.0654632	PVX_088965, SET domain protein, putative
PcyM_0505500	48.2706	2.48439	0.172875	0.873132	0.0229684	0.0856812	0.0137116	16.976	0.248873
PcyM_0505600	55.3145	46.803	25.0091	4.39635	0.0521563	2.13611	0.0666424	42.3756	1.66282
PcyM_0505700	24.3368	14.3297	25.0733	0.194712	0.0841707	2.40243	0.110436	21.2466	0.697938
PcyM_0505800	22.1435	40.332	106.176	6.22925	81.9739	5.87567	15.5087	56.2173	27.3969
PcyM_0505900	53.8758	99.5656	62.6719	0.0847767	0.0777373	2.82847	0.171759	72.0378	0.790687	PVX_088985, plastid 50S ribosomal protein L21, putative
PcyM_0506000	18.6107	0.117584	0.0190727	1.29446	0.244018	67.5529	0.204717	6.24912	17.324	PVX_088990, hypothetical protein, conserved
PcyM_0506100	9.5232	0.307396	27.6592	0.0299138	0.0119594	0.00422202	0.00161765	12.4966	0.0119282	PVX_088995, hypothetical protein, conserved
PcyM_0506200	12.5147	5.48474	24.3606	0.0624905	1.15805	0.338392	0.0278596	14.12	0.396699
PcyM_0506300	30.0013	11.8311	0.0504512	0.458039	0.123111	0.172636	0.0313345	13.9609	0.19628	PVX_080420, MB2 protein, putative; PVX_089010, translation initiation factor IF-2, putative (IF2c)
PcyM_0506400	18.537	28.5882	15.0712	1.81368	0.0558918	0.274303	0.453718	20.7321	0.649398	PVX_089015, ATP-dependent RNA helicase DBP10, putative
PcyM_0506500	14.5595	22.5281	117.049	6.27917	0.41309	0.656081	2.06246	51.3787	2.3527	PVX_089020, hypothetical protein, conserved
PcyM_0506600	2.81324	4.40826	1.84443	0.584784	1.82591	0.203356	0.37516	3.02198	0.747302
PcyM_0506700	14.2265	31.2989	45.8338	0.0948185	0.146379	0.157541	0.274338	30.4531	0.168269	PVX_089025, receptor for activated c kinase, putative
PcyM_0506800	413.684	561.555	884.053	32.842	29.5017	25.1571	115.757	619.764	50.8145	PVX_089030, hypothetical protein, conserved
PcyM_0506900	147.297	235.443	297.212	19.6501	15.1972	10.7025	0.820613	226.651	11.5926	PVX_089035, ubiquitin conjugation factor E4 B, putative (UBE4B)
PcyM_0507000	24.3447	27.5181	75.009	6.53022	1.53278	0.354118	0.077644	42.2906	2.12369	PVX_089040, dehydrodolichyl diphosphate synthetase, putative
PcyM_0507100	70.9506	24.9785	0.40152	0.00924642	0.129312	2.12525	0.0131918	32.1102	0.56925
PcyM_0507200	54.7036	12.3323	20.9939	4.53597	23.624	1.61509	9.17052	29.3433	9.73641	PVX_089050, alpha/beta hydrolase, putative
PcyM_0507300	6.33111	8.1457	1.94908	1.93565	0.407911	0.0877315	0.040699	5.4753	0.617999	PVX_089055, E3 ubiquitin-protein ligase, putative
PcyM_0507400	23.4428	32.2945	45.7198	0.0601534	0.0964033	1.27336	0.0181052	33.819	0.362004	PVX_089060, hypothetical protein, conserved
PcyM_0507500	1.35047	3.48037	1.47623	0.0220637	0.0364346	0.0627048	0.124532	2.10236	0.0614337	PVX_089065, hypothetical protein, conserved
PcyM_0507600	0.10852	0.469659	0.00229992	0.0507538	0.0464685	0.173418	0.0911162	0.193493	0.0904391	PVX_089070, hypothetical protein, conserved
PcyM_0507700	0.0429139	0.204057	0.0566324	0.0336374	0.0692021	0.060695	0.436	0.101201	0.149884	PVX_089075, hypothetical protein, conserved
PcyM_0507800	79.36	45.5914	45.0335	4.50472	1.9475	0.469579	0.0461315	56.6616	1.74198	PVX_089080, cytochrome c oxidase assembly protein, putative
PcyM_0507900	14.7611	7.10699	6.38577	11.4313	0.0759081	0.387868	0.0544329	9.41794	2.98737	PVX_089085, protein KRI1, putative (KRI1)
PcyM_0508000	4.77739	1.08127	4.87957	0.38071	0.515203	0.630012	0.113819	3.57941	0.409936	PVX_089087, conserved Plasmodium protein, unknown function
PcyM_0508100	137.327	171.985	215.629	17.1684	9.34115	31.4797	44.839	174.981	25.7071	PVX_089090, hypothetical protein, conserved
PcyM_0508200	230.856	126.456	365.457	0.721736	23.5301	2.19066	10.0296	240.923	9.11802	PVX_089095, translation initiation factor IF-3, putative (IF3a)
PcyM_0508300	8.03856	31.5422	20.6205	0.0374998	1.53673	0.00823211	0.00534493	20.0671	0.396953	PVX_089105, hypothetical protein, conserved
PcyM_0508400	10.5266	18.8707	14.2427	0.482299	0.202847	0.0660321	3.53867	14.5467	1.07246
PcyM_0508500	117.456	161.323	254.615	3.51876	4.50159	0.120732	0.420834	177.798	2.14048	PVX_089115, hypothetical protein, conserved
PcyM_0508600	77.7452	96.5187	131.948	4.55266	1.51137	2.60344	2.04033	102.07	2.67695	PVX_089120, hypothetical protein, conserved
PcyM_0508700	62.8759	33.6227	96.2014	2.82234	0.650651	7.30511	5.05257	64.2333	3.95767	PVX_089125, lipase maturation factor, putative (LMF1)
PcyM_0508800	0.81661	0.102528	0.04852	2.82666	1.45257	0.00653749	0.0417959	0.322552	1.08189
PcyM_0508900	50.16	87.2487	13.1355	2.77953	1.14845	0.143177	0.0539169	50.1814	1.03127	PVX_089135, hypothetical protein, conserved
PcyM_0509000	280.974	268.183	103.078	0.307023	0.738491	115.114	0.120084	217.411	29.07	PVX_089135, hypothetical protein, conserved
PcyM_0509100	41.204	55.3327	4.31907	0.0769286	0.251406	0.0959167	19.8502	33.6186	5.06861	PVX_089140, nucleoside transporter 2, putative (NT2)
PcyM_0509200	38.5296	40.5086	36.4408	0.0633042	1.96294	6.07572	1.05037	38.493	2.28808	PVX_089145, GTP-binding protein, putative
PcyM_0509300	122.17	130.978	401.427	2.82452	0.752305	0.708025	1.59173	218.192	1.46914	PVX_089150, hypothetical protein, conserved
PcyM_0509400	31.6686	12.7498	1.09556	0.4947	12.1034	0.524259	69.0247	15.1713	20.5368	PVX_089155, 3'-5' exonuclease domain containing protein
PcyM_0509500	39.1835	0.578294	0.350643	0.117279	0.131421	0.0651171	0.115165	13.3708	0.107246
PcyM_0509600	8.35352	16.9055	0.0389136	22.9051	0.0612656	0.0716154	0.0175003	8.43264	5.76386	PVX_089165, dicarboxylate/tricarboxylate carrier, putative (DTC)
PcyM_0509700	64.6425	65.7909	66.5397	4.05511	0.361275	8.27709	1.31653	65.6577	3.5025	PVX_089170, DnaJ protein, putative
PcyM_0509800	53.7888	24.8436	22.0598	4.09904	1.09802	8.64305	0.541241	33.5641	3.59534	PVX_089175, hypothetical protein, conserved
PcyM_0509900	12.9589	19.0012	99.5091	1.09962	1.66938	9.45933	3.41771	43.8231	3.91151	PVX_089180, lipoate-protein ligase B, putative
PcyM_0510000	1.88946	1.68742	0.0374296	0.0404073	0.623554	0.157549	0.137015	1.20477	0.239631	PVX_089185, inner membrane complex protein 1i, putative (IMC1i)
PcyM_0510100	50.566	59.8207	10.1848	1.37721	7.44655	6.25258	5.32615	40.1905	5.10062
PcyM_0510200	3.6454	1.37653	0.266582	0.0940562	0.484846	0.018299	0.066683	1.76284	0.165971	PVX_089195, alpha/beta hydrolase, putative
PcyM_0510300	1.92461	7.72005	0.0340467	0.00211073	0.00212879	0.011065	0.00144179	3.22624	0.00418658
PcyM_0510400	0.0676459	10.5335	0.100258	0.0170345	0.212748	0.274326	0.328003	3.56715	0.208028	PVX_089205, clustered-asparagine-rich protein, putative
PcyM_0510500	0.058028	0.166137	0.605953	0.0300845	0.0544535	0.0387121	0.00396423	0.276706	0.0318036
PcyM_0510600	18.1111	23.7075	132.164	9.44413	4.36478	0.0394943	0.402858	57.9941	3.56281	PVX_089210, hypothetical protein, conserved
PcyM_0510700	2.9211	18.5334	11.3347	0.915596	2.2903	1.12796	0.0906021	10.9297	1.10612	PVX_089215, serine/threonine protein kinase VPS15, putative (VPS15)
PcyM_0510800	1.76178	0.0151816	3.41964	0.0188248	0.0661683	0.337799	0.0402933	1.7322	0.115771	PVX_089220, hypothetical protein, conserved
PcyM_0510900	176.792	227.455	363.261	9.63857	12.3496	56.1343	14.4609	255.836	23.1458	PVX_089225, U5 snRNP-specific 40 kDa protein, putative
PcyM_0511000	53.3429	79.8528	100.638	2.39343	0.23018	0.0976818	0.133247	77.9444	0.713635	PVX_089230, hypothetical protein, conserved
PcyM_0511100	4.12328	0.210254	0.211871	0.0213038	0.0661037	11.7409	0.0129626	1.51514	2.96033	PVX_089235, protein transport protein SEC23, putative
PcyM_0511200	50.8186	4.5999	262.121	0.490446	2.3024	0.492366	4.94084	105.846	2.05651	PVX_089240, dynein light chain 1, putative (DLC1)
PcyM_0511300	0.840845	15.9242	0.189969	0.0792178	0.214698	0.0444935	0.0707838	5.65166	0.102298
PcyM_0511400	1.99915	1.08716	2.0276	0.361976	0.381091	3.20863	2.00473	1.70464	1.48911	PVX_089245, hypothetical protein, conserved
PcyM_0511500	8.8563	7.74317	7.21778	0.0889397	0.1731	0.104306	0.212776	7.93909	0.14478	PVX_089250, small nuclear ribonucleoprotein G, putative
PcyM_0511600	39.6815	100.693	20.1779	2.25509	2.73472	0.052451	0.0598076	53.5173	1.27552	PVX_089255, hypothetical protein, conserved
PcyM_0511700	148.799	241.822	237.075	22.5387	19.0151	6.4829	77.4547	209.232	31.3728	PVX_089260, mediator of RNA polymerase II transcription subunit 7, putative (MED7)
PcyM_0511800	11.4686	23.6301	16.6361	0.292085	0.038729	4.78564	0.315529	17.2449	1.358	PVX_089265, hypothetical protein, conserved
PcyM_0511900	613.74	540.885	776.515	29.8238	3.88237	61.8523	53.96	643.713	37.3796	PVX_089270, hypothetical protein, conserved
PcyM_0512000	1043.23	875.726	1581.2	69.3564	20.5957	34.2228	18.9007	1166.72	35.7689
PcyM_0512100	101.277	64.0691	55.6062	1.63129	2.39743	1.30202	2.35189	73.6509	1.92066	PVX_089280, 60S ribosomal protein L22, putative
PcyM_0512200	38.4628	76.8051	164.492	6.06409	0.77131	0	0.525206	93.2532	1.84015	PVX_089285, hypothetical protein, conserved
PcyM_0512300	37.1112	110.285	36.4636	8.91047	10.0379	0.316912	15.8754	61.2865	8.78519	PVX_089290, ribosomal RNA small subunit methyltransferase NEP1, putative (NEP1)
PcyM_0512400	17.4139	2.99679	1.87443	0.157437	0.0346321	0.047137	0.00257833	7.42838	0.060446	PVX_089292, conserved Plasmodium protein, unknown function
PcyM_0512500	37.7403	65.7317	328.07	0.123977	0.214608	0.0125724	0.0736288	143.847	0.106197
PcyM_0512600	0.883335	1.40637	0.408005	0.128743	0.152399	0.236164	0.2242	0.899236	0.185376	PVX_089295, ATP-dependent RNA helicase prh1, putative
PcyM_0512700	467.067	631.691	706.174	77.2124	8.80846	1.17186	1.50016	601.644	22.1732
PcyM_0512800	184.553	90.7986	318.024	11.676	9.99042	2.98179	0.116201	197.792	6.19111	PVX_089300, hypothetical protein, conserved
PcyM_0512900	14.3692	2.43291	80.9256	0.092152	0.140712	3.36501	0.0185962	32.5759	0.904118	PVX_089305, protein kinase, putative
[truncated: 5,180 more rows]
