# Supplementary material for: A comparative transcriptomic analysis of replicating and dormant liver stages of the relapsing malaria parasite Plasmodium cynomolgi
Source: eLife. 2017 Dec 7;6:e29605. doi: 10.7554/eLife.29605 (PMC5758109; doi:10.7554/eLife.29605)
Supplement: Supplementary file 5. [file elife-29605-supp5.xlsx]

## Sheet: Supplementary_Table_5
Supplementary File 5: List of differentially expressed genes between hypnozoite and liver schizont samples passing the cut-off of >2 fold change absolute value and a 10% false discovery rate, related to Figure 2
Gene ID	Log2 FC Hz/Sz	- LOG10 adj. P-value	Upregulated in	Average FPKM Sz	Average FPKM Hz
PcyM_0317700	7.41865	2.9535	Hz	0.0373695	16.6727
PcyM_1124800	5.79395	2.81293	Hz	0.0855197	9.3866
PcyM_0519400	4.67639	2.12789	Hz	0.298904	10.6272
PcyM_0516100	4.45718	1.7321	Hz	0.337673	11.2603
PcyM_1453900	4.4411	1.63614	Hz	0.0162487	0.747565
PcyM_1261200	4.32082	1.60738	Hz	0.0570816	1.82804
PcyM_1031600	4.21619	1.74921	Hz	0.0759543	1.98771
PcyM_1265700	3.77398	1.18168	Hz	0.0777369	2.0282
PcyM_1450200	3.37709	1.5609	Hz	0.129832	1.73291
PcyM_0303600	3.34614	1.02488	Hz	0.0403457	0.501183
PcyM_1250300	3.27238	1.00636	Hz	0.0965714	1.39105
PcyM_0533600	3.23229	1.43074	Hz	0.379852	4.42983
PcyM_0944000	2.91624	1.11151	Hz	0.0621443	0.590494
PcyM_1423400	2.79551	1.00471	Hz	0.680264	6.30518
PcyM_1006500	2.70105	0.957526	Hz	0.390662	3.17477
PcyM_1108500	2.67113	0.840407	Hz	0.367352	3.05604
PcyM_1005800	2.40689	0.753374	Hz	0.641846	4.3037
PcyM_1127600	2.36073	0.866839	Hz	0.310409	1.87236
PcyM_1219100	2.18777	0.784657	Hz	12.1535	64.2208
PcyM_0518700	2.14897	0.503777	Hz	0.258634	1.59833
PcyM_1145100	2.09637	0.50541	Hz	0.0987124	0.549139
PcyM_0316800	2.08795	0.802574	Hz	11.1896	53.7033
PcyM_0121700	2.04351	0.497954	Hz	0.0254542	0.160799
PcyM_0942900	2.00886	0.481966	Hz	1.79767	8.688
PcyM_0062700	1.95988	0.441168	Sz	2.04982	10.0924
PcyM_1448900	1.91788	0.474144	Sz	0.892041	4.38483
PcyM_0943000	1.84453	0.470592	Sz	2.14358	10.055
PcyM_1470500	1.84416	0.416873	Sz	0.606671	2.83061
PcyM_0823600	1.64685	0.335704	Sz	0.352304	1.44991
PcyM_1148000	1.6205	0.344275	Sz	0.0509582	0.224751
PcyM_1460500	1.58712	0.348318	Sz	0.211068	0.818355
PcyM_0420500	1.56707	0.30442	Sz	0.176461	0.676841
PcyM_0709600	1.55628	0.4301	Sz	1.93752	6.54759
PcyM_0121300	1.4362	0.405777	Sz	0.217723	0.666711
PcyM_1450600	1.35254	0.228056	Sz	1.69492	6.51879
PcyM_0534500	1.28969	0.266744	Sz	1.59887	4.67302
PcyM_0506000	1.28349	0.316004	Sz	6.24912	17.324
PcyM_1249600	1.28126	0.334493	Sz	2.74806	7.4686
PcyM_1031200	1.23872	0.319165	Sz	1.78693	4.71002
PcyM_0325700	1.23822	0.334434	Sz	1.91202	4.97744
PcyM_0424000	1.19778	0.266704	Sz	0.0184947	0.0507689
PcyM_1302300	1.18489	0.438824	Sz	2.78004	6.64347
PcyM_1415100	1.17415	0.238966	Sz	0.35412	0.916357
PcyM_1451700	1.15229	0.351593	Sz	1.24858	2.96377
PcyM_0915300	1.14855	0.350215	Sz	0.105695	0.248985
PcyM_1474300	1.09241	0.272014	Sz	2.43209	5.68527
PcyM_1125000	0.986331	0.229163	Sz	7.27084	15.7658
PcyM_1263600	0.939924	0.231626	Sz	4.79541	9.93756
PcyM_0917200	0.939746	0.237883	Sz	1.0595	2.18612
PcyM_1214100	0.9235	0.229424	Sz	9.60394	19.698
PcyM_0060200	0.912437	0.186838	Sz	0.061153	0.133108
PcyM_0909200	0.859195	0.155215	Sz	0.162556	0.337218
PcyM_1139400	0.856448	0.183344	Sz	14.0992	28.06
PcyM_0511100	0.830833	0.184541	Sz	1.51514	2.96033
PcyM_1323000	0.80022	0.186838	Sz	1.47134	2.75123
PcyM_1416600	0.786251	0.236655	Sz	10.159	18.2424
PcyM_0807200	0.749829	0.154424	Sz	0.310858	0.56009
PcyM_0920800	0.746132	0.176038	Sz	0.446943	0.796478
PcyM_1119900	0.699624	0.149134	Sz	1.2253	2.18585
PcyM_1311400	0.677538	0.121531	Sz	0.274691	0.461846
PcyM_0707600	0.641141	0.11209	Sz	0.0730824	0.122678
PcyM_0504200	0.608386	0.136377	Sz	2.78157	4.48776
PcyM_1436800	0.542755	0.093653	Sz	0.228733	0.369918
PcyM_0840200	0.503384	0.104563	Sz	0.289374	0.434004
PcyM_1126800	0.502875	0.103607	Sz	12.7001	18.8721
PcyM_0417500	0.476634	0.0925119	Sz	1.20504	1.76464
PcyM_0913400	0.46068	0.100172	Sz	7.36201	10.5094
PcyM_0102900	0.458102	0.0928014	Sz	3.36427	4.80645
PcyM_1455400	0.419974	0.0694546	Sz	2.48102	3.39796
PcyM_0703100	0.417313	0.0788231	Sz	0.0849733	0.120421
PcyM_1116900	0.405289	0.0945432	Sz	10.3679	14.1699
PcyM_0509400	0.397334	0.093653	Sz	15.1713	20.5368
PcyM_0519200	0.366049	0.0638928	Sz	0.454623	0.586247
PcyM_1266300	0.352939	0.108606	Sz	6.31049	8.17709
PcyM_0703000	0.326159	0.0695027	Sz	0.431924	0.554168
PcyM_0734200	0.322833	0.0719426	Sz	3.03582	3.89715
PcyM_0709400	0.310656	0.0696672	Sz	1.56941	1.99557
PcyM_1133600	0.30771	0.0580192	Sz	0.941456	1.21627
PcyM_0917500	0.305709	0.0592259	Sz	0.265379	0.347326
PcyM_0514300	0.293895	0.0809447	Sz	4.51227	5.61526
PcyM_0923700	0.291115	0.0533753	Sz	0.0605146	0.079036
PcyM_0529500	0.289401	0.067422	Sz	0.698665	0.873922
PcyM_0819000	0.288162	0.0667536	Sz	6.64825	8.27095
PcyM_0821600	0.270848	0.0577957	Sz	1.00082	1.23769
PcyM_0035500	0.26954	0.0451401	Sz	1.21451	1.44674
PcyM_0122000	0.269388	0.0634385	Sz	1.32126	1.63965
PcyM_1312200	0.249636	0.051637	Sz	0.56451	0.684077
PcyM_1459800	0.244373	0.0524331	Sz	1.23697	1.49361
PcyM_1223100	0.238086	0.0629997	Sz	3.50687	4.18129
PcyM_1269700	0.23165	0.0518211	Sz	23.2062	27.7186
PcyM_1032200	0.22772	0.0662945	Sz	4.19831	4.9615
PcyM_1233500	0.178763	0.0382784	Sz	6.94592	7.90128
PcyM_0731400	0.157332	0.035008	Sz	0.673739	0.751913
PcyM_1222600	0.156717	0.0420585	Sz	2.53668	2.854
PcyM_1020000	0.144205	0.024142	Sz	7.59347	8.20583
PcyM_0913300	0.131255	0.0234186	Sz	2.91264	3.22031
PcyM_0620100	0.125638	0.0247631	Sz	2.05492	2.26205
PcyM_1426700	0.12063	0.0170631	Sz	0.673044	0.748787
PcyM_1134000	0.112252	0.0234926	Sz	2.89226	3.16643
PcyM_0318000	0.105799	0.0153373	Sz	0.492931	0.525655
PcyM_1428000	0.10571	0.0332471	Sz	24.8064	26.811
PcyM_1026500	0.102656	0.0225791	Sz	2.07733	2.24794
PcyM_1352800	0.101228	0.0200899	Sz	1.38018	1.50566
PcyM_1435400	0.0997616	0.016395	Sz	0.347501	0.373001
PcyM_1402700	0.0994574	0.0184958	Sz	1.35395	1.5106
PcyM_1150900	0.0982426	0.0189406	Sz	1.0781	1.13913
PcyM_1031800	0.0973706	0.0192323	Sz	0.439052	0.481309
PcyM_0950500	0.0859513	0.0163318	Sz	0.308105	0.33157
PcyM_1417700	0.0741604	0.0167692	Sz	2.74981	2.92017
PcyM_1348100	0.0663802	0.0137688	Sz	1.49622	1.57028
PcyM_0524400	0.0553708	0.0127562	Sz	8.76585	9.18373
PcyM_0628100	0.0405329	0.0106365	Sz	1.79903	1.85544
PcyM_0418000	-0.0491751	0.0131718	Sz	41.01	39.4541
PcyM_1321900	-0.0590337	0.0142859	Sz	19.1217	18.3204
PcyM_1403800	-0.0777151	0.0145642	Sz	2.91847	2.71661
PcyM_1240500	-0.0810063	0.0140086	Sz	0.713311	0.670929
PcyM_1418800	-0.0899033	0.015903	Sz	0.320845	0.292647
PcyM_1405500	-0.0919529	0.0245151	Sz	2.28194	2.14033
PcyM_1467300	-0.108382	0.0213964	Sz	4.35639	4.02093
PcyM_1238700	-0.117559	0.0245151	Sz	0.995733	0.923889
PcyM_0604800	-0.120262	0.0235623	Sz	0.639299	0.589491
PcyM_0060400	-0.120359	0.022134	Sz	0.569289	0.498926
PcyM_0414400	-0.147158	0.0289513	Sz	0.244527	0.217911
PcyM_0107800	-0.154508	0.0261779	Sz	16.7285	15.1381
PcyM_0803300	-0.158328	0.0356409	Sz	8.79112	7.87256
PcyM_1101200	-0.19355	0.0341671	Sz	11.9445	10.1173
PcyM_0524200	-0.204615	0.031315	Sz	1.34886	1.11039
PcyM_0944700	-0.208907	0.0395341	Sz	13.2646	11.2988
PcyM_1458300	-0.221168	0.0363847	Sz	6.28764	5.27419
PcyM_1202700	-0.225366	0.0456096	Sz	1.50697	1.27758
PcyM_0935100	-0.226387	0.0366587	Sz	1.20671	0.995134
PcyM_1278600	-0.243139	0.0442547	Sz	12.6136	10.3382
PcyM_1110100	-0.252315	0.0437954	Sz	0.466845	0.386508
PcyM_0213500	-0.259006	0.0490754	Sz	21.6733	17.7744
PcyM_1406000	-0.265011	0.050845	Sz	4.30482	3.45553
PcyM_0011400	-0.294319	0.0642577	Sz	25.1975	20.3244
PcyM_1104700	-0.309025	0.0956644	Sz	5.32916	4.26421
PcyM_1432800	-0.315563	0.0665941	Sz	4.1889	3.2778
PcyM_0328300	-0.321614	0.056939	Sz	10.0919	7.55353
PcyM_1460000	-0.35539	0.0665301	Sz	0.820459	0.614795
PcyM_0946700	-0.367536	0.0912787	Sz	25.9472	19.6765
PcyM_0737900	-0.384165	0.0967986	Sz	0.541797	0.402097
PcyM_1423600	-0.389864	0.0790973	Sz	5.7619	4.23671
PcyM_1307200	-0.411771	0.150379	Sz	182.458	135.498
PcyM_0917600	-0.417467	0.140061	Sz	9.93004	7.32025
PcyM_1032100	-0.41874	0.125627	Sz	3.17433	2.34157
PcyM_1208800	-0.42904	0.0702438	Sz	0.51817	0.338802
PcyM_0626000	-0.443938	0.11008	Sz	48.6676	34.7483
PcyM_1026100	-0.452398	0.095304	Sz	7.58813	5.34221
PcyM_0308900	-0.456039	0.0838925	Sz	1.66984	1.12701
PcyM_0522100	-0.45849	0.121653	Sz	56.2707	39.9303
PcyM_0509600	-0.474063	0.0938655	Sz	8.43264	5.76386
PcyM_1223800	-0.474087	0.0859444	Sz	3.9792	2.69252
PcyM_0518200	-0.482476	0.0847915	Sz	1.35103	0.9319
PcyM_1204800	-0.489378	0.101758	Sz	19.5184	13.2515
PcyM_0059500	-0.530169	0.112774	Sz	14.4813	9.29797
PcyM_0621900	-0.538363	0.104732	Sz	0.541789	0.344043
PcyM_1206600	-0.5416	0.104563	Sz	4.19306	2.6596
PcyM_1231700	-0.542394	0.166087	Sz	38.3893	25.7222
PcyM_1236500	-0.544374	0.153458	Sz	6.55482	4.34153
PcyM_1347900	-0.559056	0.0969187	Sz	0.985932	0.610103
PcyM_1025700	-0.559373	0.144762	Sz	2.50348	1.62517
PcyM_0821500	-0.559378	0.12575	Sz	2.24167	1.45541
PcyM_0010300	-0.571678	0.124436	Sz	20.3251	13.0138
PcyM_0029900	-0.571678	0.124436	Sz	14.8839	9.48632
PcyM_1285300	-0.571678	0.124436	Sz	14.5204	9.36794
PcyM_0068000	-0.574136	0.125439	Sz	17.2669	11.1228
PcyM_1440300	-0.574884	0.121531	Sz	2.35376	1.49147
PcyM_1449000	-0.59285	0.101758	Sz	0.151981	0.0871683
PcyM_1324000	-0.593828	0.12975	Sz	10.0741	6.31036
PcyM_1422800	-0.602435	0.142367	Sz	1.34697	0.855394
PcyM_1111800	-0.604083	0.108288	Sz	5.46391	3.2719
PcyM_0959600	-0.610754	0.194386	Sz	121.766	78.2207
PcyM_1243600	-0.615044	0.1714	Sz	11.6494	7.36077
PcyM_0213700	-0.615389	0.133141	Sz	0.468231	0.297927
PcyM_0079000	-0.617767	0.229986	Sz	527.828	337.091
PcyM_1286800	-0.618401	0.230155	Sz	614.726	393.099
PcyM_1110200	-0.620292	0.171425	Sz	13.5469	8.50478
PcyM_0502400	-0.624302	0.164404	Sz	34.6037	21.6625
PcyM_0011000	-0.629687	0.235338	Sz	591.382	374.337
PcyM_0010500	-0.629768	0.235338	Sz	552.235	349.578
PcyM_0007000	-0.634012	0.142067	Sz	15.2587	9.41263
PcyM_0203300	-0.635834	0.133772	Sz	1.39419	0.863974
PcyM_0618900	-0.64895	0.152931	Sz	3.10377	1.88807
PcyM_API04800	-0.649164	0.125316	Sz	0.25987	0.157518
PcyM_0813700	-0.649883	0.136943	Sz	2.13741	1.2661
PcyM_0707700	-0.650925	0.222478	Sz	36.1597	22.4573
PcyM_1336300	-0.662319	0.156955	Sz	6.02209	3.62307
PcyM_0528700	-0.664669	0.19305	Sz	0.640171	0.391651
PcyM_1118000	-0.667434	0.17623	Sz	21.1825	12.8049
PcyM_1280100	-0.672136	0.121385	Sz	7.99423	4.69983
PcyM_0940900	-0.674152	0.26893	Sz	694.983	427.114
PcyM_0729200	-0.683755	0.157989	Sz	4.95457	2.92903
PcyM_1313400	-0.684291	0.191426	Sz	3.32484	2.00188
PcyM_1435700	-0.700649	0.149369	Sz	2.32206	1.32393
PcyM_1453000	-0.70196	0.157631	Sz	4.69085	2.69387
PcyM_0011200	-0.702397	0.206391	Sz	45.9395	27.3881
PcyM_0312100	-0.705377	0.164384	Sz	35.8336	20.6523
PcyM_0813100	-0.70865	0.160881	Sz	1.86131	1.06835
PcyM_1240000	-0.70868	0.222277	Sz	21.4817	12.7231
PcyM_1340700	-0.713118	0.271417	Sz	186.777	111.414
PcyM_0060300	-0.714432	0.156315	Sz	0.888059	0.487212
PcyM_0736900	-0.719224	0.171686	Sz	14.2879	8.1828
PcyM_0833200	-0.723276	0.203155	Sz	2.06075	1.19812
PcyM_1445400	-0.741221	0.154273	Sz	6.42331	3.52826
PcyM_1263200	-0.74222	0.142109	Sz	11.047	5.84956
PcyM_0923100	-0.753386	0.182517	Sz	50.3818	28.1495
PcyM_0501900	-0.7589	0.171686	Sz	11.3508	6.39045
PcyM_1419400	-0.763276	0.199298	Sz	52.247	29.4345
PcyM_1439800	-0.766264	0.200273	Sz	8.98594	4.99653
PcyM_1422500	-0.770407	0.237429	Sz	14.2955	7.99472
PcyM_1032500	-0.775822	0.184693	Sz	7.09369	3.86708
PcyM_1133100	-0.776049	0.192021	Sz	16.7471	9.17994
PcyM_1436300	-0.783365	0.212027	Sz	10.2501	5.68267
PcyM_0303900	-0.788736	0.149358	Sz	4.47763	2.29251
PcyM_0402500	-0.7974	0.198019	Sz	5.20071	2.81763
PcyM_0061400	-0.804793	0.150304	Sz	13.405	6.82202
PcyM_1222100	-0.81328	0.215194	Sz	1.33166	0.724035
PcyM_0912700	-0.827844	0.212124	Sz	11.1989	5.93861
PcyM_1444200	-0.828019	0.164384	Sz	4.10138	2.08193
PcyM_1337000	-0.831221	0.228801	Sz	8.72976	4.65475
PcyM_0527600	-0.834566	0.166993	Sz	0.66861	0.329221
PcyM_0029000	-0.837414	0.147796	Sz	13.9298	6.56536
PcyM_0047700	-0.837414	0.147796	Sz	13.7165	6.62648
PcyM_0048600	-0.837414	0.147796	Sz	11.0988	5.35241
PcyM_0073100	-0.837414	0.147796	Sz	13.9421	6.80965
PcyM_1284200	-0.837414	0.147796	Sz	11.9167	5.92769
PcyM_0625800	-0.844262	0.186449	Sz	0.714062	0.362233
PcyM_1003700	-0.860481	0.196586	Sz	37.9694	18.8634
PcyM_0612900	-0.862132	0.210432	Sz	4.49415	2.31124
PcyM_0321000	-0.865904	0.17825	Sz	17.8774	8.77651
PcyM_1407200	-0.871579	0.376517	Sz	917.549	488.952
PcyM_0840400	-0.87383	0.205905	Sz	1.9956	1.01849
PcyM_0948500	-0.877614	0.208597	Sz	3.06086	1.54393
PcyM_0035800	-0.882345	0.165311	Sz	4.70477	2.18893
PcyM_0904100	-0.883542	0.1714	Sz	9.12487	3.90404
PcyM_0944200	-0.891761	0.238977	Sz	2.42212	1.22613
PcyM_0735400	-0.895431	0.40918	Sz	971.403	509.913
PcyM_0208200	-0.89626	0.236173	Sz	1.47399	0.744844
PcyM_1288000	-0.897567	0.207824	Sz	24.5373	12.0156
PcyM_1476000	-0.897834	0.217233	Sz	26.3693	12.8228
PcyM_1338700	-0.908555	0.245545	Sz	79.2539	39.7433
PcyM_1134700	-0.922711	0.212394	Sz	1.66443	0.805455
PcyM_0807500	-0.926108	0.195486	Sz	3.42102	1.61209
PcyM_0500700	-0.931969	0.217919	Sz	22.0702	10.4818
PcyM_1122900	-0.9327	0.250512	Sz	3.94414	1.93694
PcyM_1261600	-0.936104	0.367557	Sz	5.90823	2.99067
PcyM_1471300	-0.936739	0.239773	Sz	2.12391	1.03949
PcyM_0601300	-0.938014	0.23336	Sz	2.4902	1.21372
PcyM_0610900	-0.945289	0.214297	Sz	1.74924	0.817558
PcyM_1024400	-0.950915	0.205748	Sz	1.64205	0.767268
PcyM_0505800	-0.952268	0.283519	Sz	56.2173	27.3969
PcyM_1100900	-0.952653	0.1935	Sz	21.4238	9.16954
PcyM_1012100	-0.96231	0.281417	Sz	1.97989	0.956572
PcyM_1127900	-0.966431	0.294976	Sz	32.4424	15.7805
PcyM_1443000	-0.985714	0.240775	Sz	6.7624	3.14794
PcyM_0804100	-0.991996	0.256102	Sz	8.86707	4.19311
PcyM_1022300	-0.994663	0.250512	Sz	5.78649	2.67185
PcyM_0721500	-1.00347	0.291491	Sz	49.7923	23.346
PcyM_0806200	-1.00639	0.302894	Sz	25.7991	12.1107
PcyM_1318800	-1.0093	0.236964	Sz	5.8035	2.59744
PcyM_1219500	-1.01183	0.235472	Sz	23.4199	10.6287
PcyM_1274600	-1.02178	0.499747	Sz	87.2454	41.8521
PcyM_0807300	-1.03305	0.219793	Sz	11.5689	5.16366
PcyM_0949000	-1.03404	0.32796	Sz	7.46719	3.47396
PcyM_MT01600	-1.0342	0.212832	Sz	17.8581	7.49683
PcyM_1440100	-1.04247	0.222277	Sz	1.18587	0.517541
PcyM_0212400	-1.04578	0.277777	Sz	32.6706	14.6357
PcyM_0313900	-1.05189	0.222687	Sz	18.4624	8.01007
PcyM_0528900	-1.05226	0.205613	Sz	0.746279	0.292671
PcyM_1423000	-1.05837	0.267442	Sz	41.2023	18.2094
PcyM_1446700	-1.07722	0.228444	Sz	0.122777	0.0511506
PcyM_0906400	-1.08501	0.236091	Sz	0.577886	0.245714
PcyM_0837200	-1.0855	0.22367	Sz	2.56682	1.06687
PcyM_0405100	-1.08621	0.438824	Sz	32.7341	14.848
PcyM_1013200	-1.09239	0.212027	Sz	7.72594	2.89827
PcyM_1411000	-1.0942	0.421721	Sz	2.12415	0.952982
PcyM_1450900	-1.0953	0.24842	Sz	0.798705	0.33821
PcyM_1035000	-1.09751	0.250592	Sz	15.1127	6.25314
PcyM_0728900	-1.10127	0.292662	Sz	18.9327	8.11368
PcyM_0714800	-1.10243	0.248137	Sz	1.36803	0.556307
PcyM_1224900	-1.10387	0.278083	Sz	4.21552	1.80689
PcyM_0117500	-1.10994	0.33155	Sz	50.6572	22.0079
PcyM_0807400	-1.11349	0.438182	Sz	6.92821	3.06203
PcyM_1140300	-1.11545	0.239132	Sz	5.09076	2.10357
PcyM_1002300	-1.11724	0.376582	Sz	68.1546	29.668
PcyM_0927400	-1.12244	0.455876	Sz	76.8408	33.885
PcyM_1453200	-1.13608	0.251947	Sz	0.24924	0.10506
PcyM_0026500	-1.13752	0.415892	Sz	260.783	112.73
PcyM_1417200	-1.15615	0.339478	Sz	31.4363	13.0668
PcyM_1216500	-1.16281	0.306536	Sz	4.56816	1.81024
PcyM_0312600	-1.16352	0.266704	Sz	1.8099	0.735988
PcyM_1307300	-1.16597	0.261017	Sz	0.428352	0.161715
PcyM_0823800	-1.16939	0.509477	Sz	137.994	59.0467
PcyM_0613600	-1.17332	0.367747	Sz	15.2506	6.28687
PcyM_0529400	-1.17805	0.251516	Sz	15.1845	5.74824
PcyM_1133800	-1.17845	0.344601	Sz	7.84346	3.2064
PcyM_1263500	-1.18973	0.24653	Sz	0.677907	0.258518
PcyM_0836000	-1.1908	0.287687	Sz	0.722169	0.283288
PcyM_1219600	-1.19484	0.444815	Sz	30.5124	12.6457
PcyM_1439200	-1.19624	0.256102	Sz	2.05012	0.767253
PcyM_0513800	-1.2024	0.409503	Sz	3.83388	1.57779
PcyM_0206200	-1.20253	0.387802	Sz	76.8201	31.1793
PcyM_1138600	-1.21086	0.421238	Sz	44.9886	18.1501
PcyM_1343300	-1.22003	0.391406	Sz	5.17663	2.06633
PcyM_0104800	-1.22534	0.337054	Sz	7.98076	3.1015
PcyM_0809800	-1.22898	0.335117	Sz	10.6546	4.13513
PcyM_1209600	-1.23069	0.329628	Sz	2.06114	0.791294
PcyM_0816600	-1.24397	0.371755	Sz	32.6863	12.9469
PcyM_1240100	-1.24462	0.369389	Sz	14.1508	5.50481
PcyM_1246200	-1.24835	0.276953	Sz	2.09275	0.759091
PcyM_1416900	-1.24931	0.350195	Sz	2.75365	1.05773
PcyM_0804200	-1.25099	0.275615	Sz	3.52145	1.28341
PcyM_1416400	-1.25442	0.335503	Sz	7.24226	2.73741
PcyM_1260700	-1.25452	0.500987	Sz	50.8511	20.3098
PcyM_0936200	-1.26616	0.436179	Sz	37.7594	14.6977
PcyM_0701500	-1.27644	0.49627	Sz	4.29219	1.67712
PcyM_1474700	-1.27685	0.349886	Sz	61.3005	22.8973
PcyM_0930300	-1.2829	0.408516	Sz	3.328	1.27228
PcyM_0211600	-1.28536	0.460853	Sz	29.9611	11.5535
PcyM_1244300	-1.28674	0.486564	Sz	23.4687	9.0685
PcyM_1148800	-1.29041	0.33804	Sz	11.0106	4.01912
PcyM_0619400	-1.29965	0.405777	Sz	72.474	27.08
PcyM_1139000	-1.30103	0.398862	Sz	2.36808	0.884999
PcyM_1150100	-1.30265	0.329932	Sz	0.833779	0.298301
PcyM_1109300	-1.30395	0.413493	Sz	11.8497	4.47963
PcyM_0730600	-1.30962	0.289292	Sz	7.15475	2.46475
PcyM_0707300	-1.31109	0.565379	Sz	15.7662	6.07217
PcyM_0808000	-1.31151	0.512228	Sz	7.4979	2.87115
PcyM_1030500	-1.31509	0.307022	Sz	2.51241	0.87642
PcyM_0206000	-1.31828	0.40821	Sz	1.59521	0.587991
PcyM_1214000	-1.33022	0.458782	Sz	0.52519	0.194061
PcyM_1107000	-1.33684	0.344275	Sz	12.297	4.30609
PcyM_1103800	-1.33822	0.33804	Sz	1.30308	0.447519
PcyM_0733700	-1.33852	0.324861	Sz	5.21794	1.81453
PcyM_0219200	-1.34209	0.344987	Sz	7.9639	2.77286
PcyM_0413500	-1.34734	0.463571	Sz	8.78704	3.20393
PcyM_1203000	-1.34861	0.382605	Sz	0.758314	0.273774
PcyM_1214600	-1.34917	0.476817	Sz	22.5975	8.28337
PcyM_1267900	-1.36636	0.440754	Sz	0.925352	0.332392
PcyM_0502600	-1.36805	0.313393	Sz	2.75745	0.950528
PcyM_0608000	-1.36944	0.432604	Sz	6.86044	2.44384
PcyM_0910200	-1.37173	0.468884	Sz	83.961	30.148
PcyM_0423400	-1.38269	0.346273	Sz	0.583365	0.191689
PcyM_0730100	-1.38309	0.311219	Sz	0.531242	0.170924
PcyM_0706300	-1.38642	0.451098	Sz	27.0719	9.52648
PcyM_1339000	-1.38704	0.40821	Sz	14.9426	5.17645
PcyM_0907700	-1.39314	0.341712	Sz	8.10234	2.64406
PcyM_0526700	-1.39629	0.354091	Sz	5.85697	1.9517
PcyM_1142600	-1.40408	0.412674	Sz	8.76441	3.01147
PcyM_1268300	-1.41018	0.335271	Sz	30.2384	9.86764
PcyM_1008800	-1.41073	0.559432	Sz	1.69156	0.598357
PcyM_0025800	-1.41314	0.428057	Sz	32.0571	10.8021
PcyM_1415300	-1.42409	0.414853	Sz	0.84514	0.285935
PcyM_0115700	-1.42514	0.463571	Sz	0.757326	0.257101
PcyM_0323100	-1.42909	0.49203	Sz	2.81038	0.968187
PcyM_0012100	-1.44042	0.340778	Sz	4.80397	1.49594
PcyM_0603500	-1.46022	0.4589	Sz	8.22988	2.69116
PcyM_1229300	-1.47538	0.408516	Sz	5.22431	1.66462
PcyM_0507200	-1.48312	0.537114	Sz	29.3433	9.73641
PcyM_1024800	-1.48489	0.491769	Sz	0.207693	0.0681229
PcyM_0407800	-1.48945	0.518654	Sz	7.41821	2.44599
PcyM_0907100	-1.49142	0.418577	Sz	8.78203	2.75627
PcyM_1115700	-1.49704	0.596543	Sz	1.01829	0.334332
PcyM_1336500	-1.49759	0.522003	Sz	1.04861	0.340046
PcyM_1443600	-1.49775	0.344987	Sz	4.16594	1.17943
PcyM_0323400	-1.49893	0.441581	Sz	8.76445	2.75972
PcyM_1327800	-1.50126	0.535318	Sz	12.4676	4.06196
PcyM_1272000	-1.50499	0.520683	Sz	10.3545	3.36784
PcyM_1424300	-1.51177	0.419814	Sz	12.2776	3.79643
PcyM_1248700	-1.51218	0.826364	Sz	49.3222	16.6148
PcyM_1240200	-1.51801	0.335155	Sz	0.373583	0.10474
PcyM_1409500	-1.51877	0.348825	Sz	0.356816	0.0945229
PcyM_0507900	-1.51941	0.496352	Sz	9.41794	2.98737
PcyM_0331000	-1.52411	0.418212	Sz	29.8746	9.27739
PcyM_0806000	-1.52754	0.542854	Sz	45.8868	14.6678
PcyM_1143300	-1.53106	0.361196	Sz	0.383872	0.115609
PcyM_1463200	-1.53231	0.520647	Sz	3.65835	1.16354
PcyM_1025300	-1.54057	0.410684	Sz	7.71769	2.31401
PcyM_0217700	-1.54333	0.415708	Sz	7.09362	2.07502
PcyM_0728600	-1.54565	0.428486	Sz	23.5692	7.07773
PcyM_1473900	-1.54761	0.44131	Sz	3.50065	1.0421
PcyM_0412300	-1.54819	0.377965	Sz	9.7853	2.70002
PcyM_0117300	-1.54873	0.354135	Sz	4.089	1.18361
PcyM_1461000	-1.55015	0.459087	Sz	2.86239	0.869249
PcyM_1247000	-1.5602	0.665579	Sz	4.79619	1.52782
PcyM_1239700	-1.56113	0.513932	Sz	6.74873	2.06011
PcyM_0709300	-1.56146	0.767011	Sz	61.9991	19.9942
PcyM_0204800	-1.56167	0.604343	Sz	19.6052	6.14848
PcyM_0943500	-1.56183	0.830498	Sz	26.9157	8.71721
PcyM_0522700	-1.56641	0.349035	Sz	1.5109	0.400404
PcyM_1259900	-1.57284	0.550179	Sz	34.3576	10.5624
PcyM_1222800	-1.57377	0.572108	Sz	2.48563	0.774713
PcyM_0603900	-1.57478	0.379022	Sz	7.0417	2.04107
PcyM_0063300	-1.57788	0.411762	Sz	8.75655	2.46734
PcyM_0916300	-1.5786	0.364841	Sz	1.2726	0.358594
PcyM_1116800	-1.58123	0.464695	Sz	4.73178	1.39849
PcyM_1430500	-1.58181	0.464052	Sz	4.11564	1.23115
PcyM_1136900	-1.58613	0.656743	Sz	0.673086	0.210913
PcyM_0950600	-1.58759	0.635872	Sz	25.7447	7.98503
PcyM_0404100	-1.59525	0.495424	Sz	1.35853	0.391733
PcyM_1413800	-1.59559	0.441328	Sz	8.76749	2.52331
PcyM_0518300	-1.59577	0.489902	Sz	7.15768	2.09592
PcyM_1422900	-1.60071	0.541483	Sz	1.14872	0.3442
PcyM_1312400	-1.60132	0.47921	Sz	48.2207	14.0932
PcyM_1325300	-1.604	0.478138	Sz	14.3477	4.19048
PcyM_1445200	-1.61553	0.454739	Sz	5.3904	1.53074
PcyM_0606300	-1.61664	0.472148	Sz	5.64107	1.60473
PcyM_1348000	-1.62575	0.5611	Sz	34.2885	10.16
PcyM_0717700	-1.62665	0.467214	Sz	35.6778	10.2261
PcyM_1301800	-1.6297	0.869359	Sz	63.7491	19.6393
PcyM_1221000	-1.63279	0.66343	Sz	86.3783	25.8641
PcyM_1117300	-1.63362	0.498478	Sz	20.5601	5.85335
PcyM_0211800	-1.63912	0.427335	Sz	0.989534	0.268129
PcyM_1207500	-1.64023	0.47742	Sz	2.07596	0.586999
PcyM_0531100	-1.64165	0.427141	Sz	16.9586	4.53479
PcyM_1243900	-1.64304	0.49627	Sz	26.6428	7.53517
PcyM_1408300	-1.64421	0.545253	Sz	36.5451	10.6318
PcyM_0321600	-1.64478	0.56356	Sz	2.54197	0.744992
PcyM_1434100	-1.64543	0.553612	Sz	14.5827	4.20867
PcyM_0406000	-1.65002	0.501161	Sz	24.7378	6.95234
PcyM_1018700	-1.6567	0.448543	Sz	8.2624	2.22951
PcyM_0724100	-1.65695	0.759649	Sz	71.9534	21.4964
PcyM_1226100	-1.65751	0.492915	Sz	7.32228	2.05113
PcyM_0523100	-1.65963	0.563285	Sz	49.9831	14.2961
PcyM_1133200	-1.65967	0.709645	Sz	107.671	31.801
PcyM_0910100	-1.66325	0.464253	Sz	0.272851	0.0751692
PcyM_0906500	-1.66906	0.924709	Sz	155.958	46.7943
PcyM_0841400	-1.6717	0.552184	Sz	70.0551	19.8721
PcyM_1477000	-1.67533	0.371267	Sz	0.395798	0.103615
PcyM_0909000	-1.67599	0.702889	Sz	17.3535	5.07037
PcyM_1425400	-1.67775	0.609782	Sz	1.13474	0.323973
PcyM_1343200	-1.68258	0.865279	Sz	40.1385	11.8467
PcyM_1342800	-1.68363	0.797265	Sz	12.0027	3.5182
PcyM_1204400	-1.69072	0.365453	Sz	0.10369	0.0255533
PcyM_1440200	-1.69498	1.17828	Sz	41.061	12.2526
PcyM_1105200	-1.69746	0.511247	Sz	4.12923	1.1049
PcyM_0932200	-1.69839	0.738733	Sz	13.975	4.0135
PcyM_0711200	-1.69905	0.617682	Sz	10.7576	3.01481
PcyM_1205900	-1.6996	0.50683	Sz	53.6592	14.5598
PcyM_1477400	-1.70742	0.485325	Sz	39.9018	10.6676
PcyM_0716500	-1.70864	0.599095	Sz	12.4829	3.49233
PcyM_0317800	-1.70973	0.571888	Sz	3.26648	0.895004
PcyM_0805100	-1.71102	0.651679	Sz	54.4441	15.2299
PcyM_1231000	-1.71637	0.636765	Sz	0.685234	0.19099
PcyM_1248900	-1.72366	0.791317	Sz	9.12512	2.58829
PcyM_1123500	-1.72433	0.596585	Sz	16.3403	4.42216
PcyM_0108800	-1.72552	0.467214	Sz	2.48689	0.635571
PcyM_1001000	-1.72987	0.709564	Sz	18.3866	5.13001
PcyM_0320600	-1.7301	0.500641	Sz	14.2183	3.64947
PcyM_0523700	-1.73166	0.585605	Sz	27.986	7.52603
PcyM_0931300	-1.73864	0.690706	Sz	66.0078	18.2346
PcyM_1435000	-1.74022	0.696096	Sz	45.1609	12.3387
PcyM_1265000	-1.74844	0.829075	Sz	244.596	68.34
PcyM_0424600	-1.75225	1.00649	Sz	12.5855	3.5604
PcyM_0940300	-1.76714	0.491617	Sz	2.35379	0.604107
PcyM_1323100	-1.76788	0.531902	Sz	1.07138	0.279436
PcyM_1207900	-1.77077	0.957609	Sz	17.3155	4.80998
PcyM_1128800	-1.77174	0.857717	Sz	22.9536	6.30674
PcyM_1301900	-1.77192	1.32186	Sz	140.242	39.6728
PcyM_1010700	-1.77801	0.766305	Sz	24.7427	6.68354
PcyM_1249500	-1.77838	0.545238	Sz	4.45509	1.13778
PcyM_1116700	-1.78064	0.53693	Sz	38.8935	9.86085
PcyM_1220800	-1.78787	1.00759	Sz	122.615	33.7131
PcyM_1418900	-1.78886	0.535857	Sz	1.36422	0.338776
PcyM_0725800	-1.78992	0.786975	Sz	41.383	11.0994
PcyM_1017100	-1.78998	0.707114	Sz	20.0247	5.2726
PcyM_1250600	-1.7901	0.396116	Sz	8.76656	1.8438
PcyM_1263300	-1.79396	0.887459	Sz	27.1024	7.33721
PcyM_1301300	-1.79429	0.683447	Sz	42.4863	11.1246
PcyM_0723600	-1.79637	0.565835	Sz	8.36393	2.13281
PcyM_0062900	-1.79643	0.603553	Sz	71.2726	18.2409
PcyM_MT01300	-1.79813	0.440754	Sz	18.9658	4.31748
PcyM_1269800	-1.80512	0.516363	Sz	23.2424	5.93525
PcyM_0103900	-1.80881	0.523352	Sz	1.78362	0.440382
PcyM_1306200	-1.81154	0.496469	Sz	1.4397	0.340936
PcyM_0841000	-1.81554	0.493956	Sz	5.93574	1.3411
PcyM_0944400	-1.81563	0.642673	Sz	48.4687	12.2785
PcyM_1343400	-1.816	0.604511	Sz	76.7754	19.2969
PcyM_1419900	-1.81966	0.73607	Sz	54.824	14.1956
PcyM_0515500	-1.82163	0.611496	Sz	9.62431	2.41934
PcyM_1251200	-1.82487	0.584726	Sz	30.4106	7.52554
PcyM_1218200	-1.82811	0.972685	Sz	27.7164	7.35694
PcyM_0833900	-1.83242	0.639461	Sz	27.812	6.97226
PcyM_1265100	-1.83244	0.58266	Sz	39.8041	9.76189
PcyM_1421700	-1.83414	0.676151	Sz	8.65084	2.23589
PcyM_0525700	-1.83427	0.55283	Sz	7.84952	1.87813
PcyM_1033300	-1.83469	0.513304	Sz	3.99046	0.985485
PcyM_1005900	-1.83507	0.607057	Sz	24.4145	6.04023
PcyM_0717900	-1.83564	0.886193	Sz	39.2101	10.2736
PcyM_1338400	-1.83654	1.17595	Sz	150.983	40.408
PcyM_1403700	-1.83664	0.721561	Sz	11.1157	2.81155
PcyM_1123100	-1.83888	0.919647	Sz	8.78915	2.2988
PcyM_1352200	-1.84328	0.715082	Sz	43.3599	10.9711
PcyM_1226400	-1.84722	0.641725	Sz	82.945	20.5401
PcyM_1235800	-1.8488	0.776354	Sz	31.5506	8.03783
PcyM_1316900	-1.84951	0.554198	Sz	24.1821	5.77886
PcyM_1253400	-1.85204	0.721561	Sz	42.4802	10.7165
PcyM_1121500	-1.85317	0.458939	Sz	17.7076	3.95807
PcyM_0941500	-1.86159	0.782375	Sz	17.4506	4.39378
PcyM_1278900	-1.86365	0.694799	Sz	41.0527	10.1603
PcyM_1444600	-1.86421	0.651664	Sz	13.7762	3.36157
PcyM_1275900	-1.86465	0.553224	Sz	3.58215	0.840678
PcyM_0943100	-1.86712	0.621645	Sz	0.446617	0.106436
PcyM_0422300	-1.86758	1.24265	Sz	234.462	61.5041
PcyM_1267700	-1.86813	1.11765	Sz	39.5732	10.2937
PcyM_1127400	-1.87705	0.585177	Sz	5.78505	1.36945
PcyM_0530500	-1.87851	0.5087	Sz	0.107627	0.0246323
PcyM_0727300	-1.88043	0.945334	Sz	44.8268	11.3705
PcyM_1465600	-1.88214	0.397604	Sz	3.50787	0.65841
PcyM_1448000	-1.88299	0.599447	Sz	26.8341	6.38138
PcyM_0405700	-1.88842	0.714247	Sz	4.81301	1.16724
PcyM_1248000	-1.88929	0.569428	Sz	33.1867	7.5996
PcyM_1471900	-1.89089	0.573495	Sz	20.7052	4.85639
PcyM_1249400	-1.89277	0.622937	Sz	28.5058	6.72165
PcyM_1134900	-1.89685	0.623794	Sz	8.06698	1.88914
PcyM_1024100	-1.89704	1.42099	Sz	41.1377	10.6339
PcyM_0533000	-1.90129	0.799339	Sz	5.63554	1.38474
PcyM_1256000	-1.90874	0.687769	Sz	5.59371	1.32473
PcyM_0117700	-1.91609	0.931861	Sz	4.27574	1.04779
PcyM_0402100	-1.91615	0.582933	Sz	0.154815	0.0354012
PcyM_0819700	-1.91903	0.654954	Sz	3.46858	0.80884
PcyM_0819600	-1.91916	0.95708	Sz	6.31164	1.55767
PcyM_1428800	-1.92044	0.524358	Sz	13.832	3.03757
PcyM_0937900	-1.92198	0.515024	Sz	1.6617	0.364342
PcyM_1326600	-1.92326	0.896294	Sz	9.0448	2.2069
PcyM_0517700	-1.92672	0.466672	Sz	3.42835	0.727425
PcyM_1311900	-1.92712	0.537805	Sz	27.8023	6.22047
PcyM_0803000	-1.9278	0.524358	Sz	1.28749	0.277313
PcyM_1426400	-1.93152	0.753154	Sz	24.2192	5.71745
PcyM_1216200	-1.93158	0.441173	Sz	3.30935	0.656789
PcyM_0941000	-1.93591	0.587023	Sz	1.29471	0.285873
PcyM_1218700	-1.94169	0.755383	Sz	9.15964	2.14671
PcyM_0925300	-1.94328	0.607153	Sz	25.5881	5.68712
PcyM_0949900	-1.94679	0.738181	Sz	4.96204	1.15617
PcyM_0840600	-1.95244	0.477824	Sz	0.426404	0.0903876
PcyM_1449200	-1.96101	0.723229	Sz	7.68635	1.75095
PcyM_0422700	-1.96333	0.762184	Sz	1.9727	0.460719
PcyM_1207600	-1.96381	1.40699	Sz	24.9466	6.12348
PcyM_1018000	-1.96429	0.894778	Sz	32.2744	7.61264
PcyM_0824700	-1.96598	0.471599	Sz	0.241899	0.0486477
PcyM_1108800	-1.96809	0.639281	Sz	7.45913	1.63838
PcyM_0109000	-1.96822	0.632652	Sz	7.40808	1.63353
PcyM_0414200	-1.97366	0.645104	Sz	54.1497	11.8468
PcyM_0945800	-1.97661	0.512828	Sz	0.12699	0.0270899
PcyM_1442600	-1.97852	0.900997	Sz	9.29442	2.17407
PcyM_1033400	-1.98079	0.507069	Sz	1.67654	0.357892
PcyM_0708300	-1.98197	1.07193	Sz	99.6959	23.6477
PcyM_1447900	-1.98249	0.721561	Sz	4.77962	1.07899
PcyM_1442400	-1.98804	0.910641	Sz	14.2954	3.29942
PcyM_1346900	-1.98905	0.739634	Sz	2.37358	0.529786
PcyM_0205400	-1.98925	0.573027	Sz	18.3421	3.82884
PcyM_1032900	-1.98984	0.517586	Sz	14.8962	2.98132
PcyM_0216400	-1.98986	0.742161	Sz	98.7231	22.1072
PcyM_1415200	-1.98987	0.719181	Sz	18.8456	4.19423
PcyM_1017200	-1.9912	0.58266	Sz	0.733672	0.156726
PcyM_0737700	-1.99332	0.666937	Sz	1.08413	0.235224
PcyM_1452000	-2.00253	0.717821	Sz	111.173	24.4257
PcyM_0420000	-2.00409	0.909083	Sz	11.5155	2.61796
PcyM_1135800	-2.00609	0.922067	Sz	24.2593	5.53735
PcyM_1414900	-2.00738	1.41927	Sz	217.863	51.7757
PcyM_0621700	-2.00745	0.718163	Sz	35.8053	7.82676
PcyM_1149200	-2.00769	0.732456	Sz	24.0284	5.26746
PcyM_0950300	-2.00801	0.93101	Sz	0.971121	0.220054
PcyM_1033100	-2.01154	0.745962	Sz	8.03641	1.76514
PcyM_0213200	-2.01534	0.885034	Sz	22.8117	5.14066
PcyM_1111400	-2.01566	0.95858	Sz	29.4137	6.71994
PcyM_0306400	-2.01839	0.736555	Sz	82.2962	17.8993
PcyM_0620300	-2.01847	0.5611	Sz	17.5416	3.55722
PcyM_0947100	-2.01944	0.897507	Sz	70.2267	15.6737
PcyM_0828600	-2.02024	0.582677	Sz	67.7263	13.861
PcyM_1203400	-2.02069	0.535991	Sz	2.85831	0.571469
PcyM_0403600	-2.02632	1.39087	Sz	188.708	44.124
PcyM_1215900	-2.02994	0.664741	Sz	5.13658	1.08817
PcyM_0529800	-2.03221	1.02242	Sz	15.7668	3.56352
PcyM_1253900	-2.03427	1.14933	Sz	22.1381	5.07805
PcyM_1337300	-2.03783	0.474421	Sz	11.626	2.08029
PcyM_0728200	-2.03838	0.941909	Sz	52.0175	11.6194
PcyM_0314500	-2.03963	0.664534	Sz	5.66006	1.18754
PcyM_0811400	-2.0404	0.563997	Sz	33.8389	6.41403
PcyM_1349600	-2.04136	1.07256	Sz	99.9688	22.6115
PcyM_1307800	-2.04234	0.627333	Sz	2.00717	0.411805
PcyM_0605900	-2.04899	0.525415	Sz	1.27298	0.242804
PcyM_1110500	-2.05824	0.67467	Sz	30.8769	6.34102
PcyM_1434900	-2.0583	0.703828	Sz	16.2513	3.23821
PcyM_0925700	-2.06014	0.3876	Sz	15.8297	2.1528
PcyM_0917800	-2.06471	0.907164	Sz	86.2629	18.5997
PcyM_1424400	-2.06623	0.821473	Sz	16.3043	3.47499
PcyM_1321000	-2.07066	0.774397	Sz	3.11955	0.65832
PcyM_1437000	-2.07214	0.741454	Sz	12.8791	2.6722
PcyM_1150700	-2.0742	0.539738	Sz	1.40274	0.249018
PcyM_0941100	-2.07479	0.851323	Sz	11.033	2.3546
PcyM_0838600	-2.07821	0.747295	Sz	48.556	10.0368
PcyM_0327700	-2.07932	1.38746	Sz	5.34243	1.20153
PcyM_1256400	-2.08112	0.546039	Sz	1.01559	0.189189
PcyM_0915200	-2.0815	0.622728	Sz	41.6195	8.15827
PcyM_1310100	-2.08396	1.25626	Sz	32.001	7.10092
PcyM_1142700	-2.08676	0.539648	Sz	0.526289	0.0965048
PcyM_0212800	-2.09338	0.961571	Sz	9.61283	2.05111
PcyM_1033200	-2.09422	0.966855	Sz	30.844	6.57468
PcyM_1015800	-2.09492	0.60821	Sz	0.435273	0.0842194
PcyM_1125200	-2.09707	0.76035	Sz	8.18612	1.67353
PcyM_1107600	-2.10103	0.485325	Sz	0.680658	0.112837
PcyM_0704500	-2.10623	1.78313	Sz	243.163	54.315
PcyM_0615100	-2.10843	0.887324	Sz	29.1269	6.0838
PcyM_1349000	-2.10902	1.0727	Sz	24.4472	5.22937
PcyM_0110200	-2.11208	0.659746	Sz	14.9622	2.85331
PcyM_1102700	-2.11221	1.23451	Sz	24.8152	5.37419
PcyM_0925400	-2.11349	1.1035	Sz	40.529	8.68639
PcyM_1109200	-2.11783	0.545253	Sz	1.44859	0.265975
PcyM_1282000	-2.11786	0.462218	Sz	8.00283	1.24495
PcyM_MT03200	-2.11904	0.803706	Sz	49.6817	10.1916
PcyM_0510000	-2.11931	0.731219	Sz	1.20477	0.239631
PcyM_1455300	-2.11985	0.820135	Sz	13.8348	2.82736
PcyM_0103700	-2.12377	0.910641	Sz	17.7927	3.70253
PcyM_0704400	-2.13669	0.576865	Sz	1.81743	0.319819
PcyM_0832000	-2.13698	1.21766	Sz	11.337	2.41728
PcyM_0621300	-2.14003	0.60763	Sz	5.40582	1.00765
PcyM_1220400	-2.14303	1.01353	Sz	98.2458	20.2964
PcyM_0406500	-2.14352	0.915343	Sz	26.3084	5.33484
PcyM_1319500	-2.14833	0.523352	Sz	1.37427	0.244059
PcyM_1441200	-2.15571	0.851279	Sz	17.4991	3.5192
PcyM_0831200	-2.15706	1.42941	Sz	122.106	25.8713
PcyM_1003300	-2.15886	0.72628	Sz	4.44391	0.853188
PcyM_1339600	-2.15954	0.522355	Sz	14.0335	2.12193
PcyM_1446600	-2.16053	0.817589	Sz	92.0207	18.0472
PcyM_0933400	-2.16523	0.809279	Sz	0.911714	0.176919
PcyM_0922100	-2.16651	0.991248	Sz	3.19225	0.639674
PcyM_1009900	-2.16749	0.641691	Sz	0.493719	0.0878968
PcyM_1238600	-2.16842	0.785215	Sz	3.83678	0.739014
PcyM_0815600	-2.17069	0.796343	Sz	1.88739	0.367063
PcyM_1333000	-2.17148	0.709564	Sz	3.3097	0.615023
PcyM_1471400	-2.1781	0.515315	Sz	0.528784	0.0809819
PcyM_0617400	-2.17819	0.784279	Sz	21.0543	4.01818
PcyM_1330300	-2.17829	0.494363	Sz	15.5839	2.20516
PcyM_0716800	-2.1818	1.71078	Sz	69.1107	14.5453
PcyM_1269900	-2.18311	0.730112	Sz	14.1296	2.63142
PcyM_0214500	-2.18638	1.15262	Sz	8.13211	1.64713
PcyM_0409600	-2.18861	1.07933	Sz	31.2071	6.27468
PcyM_0814600	-2.19276	0.945503	Sz	124.257	24.3513
PcyM_0621000	-2.1949	0.664344	Sz	18.2544	3.28333
PcyM_1463300	-2.19797	0.9735	Sz	33.2692	6.50665
PcyM_0825600	-2.19869	0.918404	Sz	13.5141	2.62702
PcyM_0910800	-2.19893	0.875387	Sz	17.5726	3.35682
PcyM_1035300	-2.20085	0.734917	Sz	0.326538	0.0619692
PcyM_0415500	-2.20686	0.882711	Sz	8.00448	1.52279
PcyM_1423900	-2.20976	0.609782	Sz	5.00085	0.846865
PcyM_1341500	-2.21386	0.673549	Sz	78.4669	13.8394
PcyM_1310800	-2.21823	0.6884	Sz	5.07518	0.901011
PcyM_1440900	-2.21931	1.09078	Sz	71.0658	13.9205
PcyM_0920300	-2.22316	0.939085	Sz	50.1115	9.55728
PcyM_0730500	-2.22467	0.942373	Sz	24.3392	4.64646
PcyM_1024700	-2.22557	0.752695	Sz	5.73182	1.03232
PcyM_0531300	-2.23021	0.886193	Sz	12.5486	2.38283
PcyM_0716100	-2.23059	0.901573	Sz	144.166	27.0922
PcyM_1249700	-2.23676	1.10711	Sz	36.3359	7.03673
PcyM_0713700	-2.23708	0.653979	Sz	8.05368	1.44439
PcyM_0206700	-2.23905	0.747203	Sz	6.87878	1.21547
PcyM_1441500	-2.24262	1.34371	Sz	30.816	6.079
PcyM_0811100	-2.24348	1.51313	Sz	76.2649	15.1998
PcyM_1101900	-2.24478	1.73499	Sz	70.8157	14.2326
PcyM_0921900	-2.25132	0.910641	Sz	109.307	20.212
PcyM_0929800	-2.25323	0.622937	Sz	20.669	3.48717
PcyM_1428700	-2.25895	0.524358	Sz	1.76051	0.261064
PcyM_0909700	-2.25921	1.11527	Sz	1.74393	0.326518
PcyM_0212300	-2.26092	0.87677	Sz	16.6949	3.08367
PcyM_1211800	-2.266	0.758611	Sz	1.00422	0.173468
PcyM_0108700	-2.26683	1.3135	Sz	169.383	32.6523
PcyM_0515600	-2.2673	0.722335	Sz	3.80225	0.656188
PcyM_1404100	-2.26897	0.844463	Sz	3.38936	0.60314
PcyM_0323000	-2.26958	1.29796	Sz	538.368	103.467
PcyM_1009100	-2.27106	0.970475	Sz	109.555	20.2101
PcyM_1463400	-2.27322	1.33759	Sz	21.7745	4.18308
PcyM_0514100	-2.27391	0.932975	Sz	6.00171	1.0979
PcyM_0219400	-2.2778	1.17483	Sz	34.346	6.48129
PcyM_1321600	-2.27872	0.882768	Sz	6.49511	1.16743
PcyM_0103400	-2.2868	0.625043	Sz	14.187	2.22858
PcyM_1412200	-2.28721	1.00872	Sz	40.7694	7.43719
PcyM_0947500	-2.29091	0.864676	Sz	34.2971	6.05158
PcyM_0722800	-2.2937	0.520055	Sz	0.598993	0.0832393
PcyM_0309800	-2.29466	0.685907	Sz	15.5582	2.58716
PcyM_1431400	-2.2955	1.10185	Sz	21.2694	3.91131
PcyM_0809900	-2.29688	1.26814	Sz	8.75693	1.65359
PcyM_0205000	-2.301	0.768471	Sz	3.18015	0.547123
PcyM_1308600	-2.30674	0.834201	Sz	13.7983	2.37793
PcyM_0930200	-2.308	0.85302	Sz	32.8419	5.72842
PcyM_1032400	-2.30811	0.873197	Sz	4.32248	0.749688
PcyM_1117600	-2.30971	0.606197	Sz	8.75605	1.39228
PcyM_1208000	-2.31753	1.09547	Sz	18.6914	3.38017
PcyM_0726300	-2.31819	0.572734	Sz	10.1355	1.42268
PcyM_0305100	-2.31857	0.775189	Sz	14.2053	2.36719
PcyM_1120400	-2.32031	0.759011	Sz	23.1377	3.7897
PcyM_1273200	-2.32198	1.16288	Sz	27.0221	4.90497
PcyM_0927300	-2.32325	0.578563	Sz	0.320208	0.0429927
PcyM_1308000	-2.32445	0.951076	Sz	52.6871	9.20414
PcyM_0918500	-2.32681	0.611264	Sz	0.394679	0.0620579
PcyM_0818700	-2.33115	0.824634	Sz	12.8943	2.16552
PcyM_0504800	-2.33184	0.784433	Sz	26.4752	4.37604
PcyM_1328200	-2.33226	1.18286	Sz	88.1571	15.9115
PcyM_0710500	-2.33449	1.54799	Sz	32.2584	5.98623
PcyM_0823200	-2.33524	0.786786	Sz	2.44412	0.405963
PcyM_0217900	-2.33555	0.754624	Sz	1.15196	0.186121
PcyM_0502900	-2.3385	1.26866	Sz	7.20398	1.3029
PcyM_1337600	-2.3389	0.913505	Sz	4.01117	0.684717
PcyM_1442500	-2.3495	0.902926	Sz	12.329	2.08748
PcyM_1021700	-2.34961	0.659746	Sz	18.0098	2.56943
PcyM_1351800	-2.35358	1.34012	Sz	72.944	13.1775
PcyM_1240300	-2.35379	0.679572	Sz	0.274243	0.0423407
PcyM_0624200	-2.35575	1.05957	Sz	7.94412	1.37974
PcyM_1345100	-2.36163	1.33026	Sz	46.9874	8.40569
PcyM_1425800	-2.36238	1.00423	Sz	17.2129	2.9508
PcyM_0312500	-2.3642	0.736938	Sz	8.27683	1.29277
PcyM_1216100	-2.3653	1.01655	Sz	19.9164	3.37572
PcyM_0714200	-2.36544	1.10231	Sz	27.868	4.83932
PcyM_0110600	-2.36876	0.887034	Sz	4.49185	0.740975
PcyM_1337500	-2.37337	1.04705	Sz	95.8369	16.372
PcyM_0948400	-2.37404	0.769821	Sz	23.9295	3.84145
PcyM_1228300	-2.37507	1.23567	Sz	140.317	24.6624
PcyM_1208300	-2.37728	1.08643	Sz	48.8105	8.3869
PcyM_0813800	-2.3806	0.737929	Sz	133.445	20.5867
PcyM_1013400	-2.38258	1.00202	Sz	2.45734	0.413576
PcyM_0111600	-2.38335	0.90808	Sz	23.3619	3.85222
PcyM_0416700	-2.38872	0.697425	Sz	0.254946	0.0390395
PcyM_1435900	-2.39	0.781707	Sz	17.5082	2.72173
PcyM_0214300	-2.39248	0.928789	Sz	24.371	3.98279
PcyM_1109100	-2.39345	1.25825	Sz	53.7538	9.33283
PcyM_0812400	-2.39724	0.761784	Sz	40.0492	6.12559
PcyM_1326100	-2.39776	1.01317	Sz	13.2617	2.27695
PcyM_0939200	-2.39825	1.60639	Sz	71.1571	12.6635
PcyM_1347200	-2.40137	0.909979	Sz	8.80115	1.43106
PcyM_1211900	-2.40187	1.30487	Sz	99.7057	17.2325
PcyM_0822200	-2.4048	1.30633	Sz	10.7432	1.85153
PcyM_1135100	-2.40717	0.55283	Sz	0.507866	0.0655203
PcyM_1024500	-2.4094	1.06506	Sz	15.7151	2.59092
PcyM_0404400	-2.41022	1.66995	Sz	79.1412	13.9546
PcyM_1437400	-2.41866	1.4269	Sz	39.34	6.76242
PcyM_0318100	-2.42035	0.62946	Sz	9.16712	1.13411
PcyM_1449900	-2.42209	0.727921	Sz	35.5044	5.33064
PcyM_1248600	-2.42236	0.752694	Sz	4.28409	0.636876
PcyM_0604500	-2.4255	0.786102	Sz	0.316643	0.0496543
PcyM_1268600	-2.43114	1.87458	Sz	29.3432	5.1476
PcyM_1230000	-2.4313	1.65785	Sz	37.0964	6.41651
PcyM_0723500	-2.43159	0.611496	Sz	0.175147	0.0248747
PcyM_1026900	-2.43343	1.13668	Sz	8.70483	1.42818
PcyM_1420900	-2.43896	0.862043	Sz	28.7792	4.42853
PcyM_0712300	-2.44096	1.00889	Sz	10.9516	1.74732
PcyM_0315900	-2.44211	0.934294	Sz	46.2919	7.24682
PcyM_0920900	-2.44388	2.0259	Sz	55.6463	9.7228
PcyM_1001400	-2.44395	0.88521	Sz	14.5502	2.22708
PcyM_0920500	-2.44686	1.00748	Sz	52.2661	8.30999
PcyM_1408100	-2.44769	0.746827	Sz	1.77665	0.253553
PcyM_1109900	-2.45527	0.822289	Sz	2.48553	0.365168
PcyM_0700800	-2.45797	0.842468	Sz	10.0446	1.50923
PcyM_0411800	-2.45842	1.16809	Sz	53.3169	8.60748
PcyM_0801200	-2.46249	0.762184	Sz	0.494791	0.0713915
PcyM_0528400	-2.46258	1.02129	Sz	64.3872	10.1055
PcyM_0325200	-2.46267	1.69508	Sz	24.8612	4.21616
PcyM_0704200	-2.46584	1.22755	Sz	5.49343	0.89747
PcyM_1433000	-2.46799	1.42302	Sz	126.393	20.9496
PcyM_1146000	-2.46882	0.930295	Sz	7.83694	1.19034
PcyM_1349700	-2.47195	1.19169	Sz	67.2048	10.8027
PcyM_0618400	-2.4756	1.32658	Sz	28.3732	4.62137
PcyM_0212100	-2.47854	1.27885	Sz	12.073	1.96253
PcyM_1322900	-2.47888	1.05719	Sz	34.4152	5.38711
PcyM_1474400	-2.4801	1.02524	Sz	30.2908	4.69299
PcyM_0607700	-2.48092	0.850241	Sz	18.8463	2.73132
PcyM_0938700	-2.4818	1.01062	Sz	11.1571	1.71887
PcyM_0531000	-2.48253	0.993215	Sz	4.05396	0.621317
PcyM_1277300	-2.48452	0.915343	Sz	2.2662	0.339894
PcyM_0321300	-2.48534	0.885526	Sz	12.3528	1.84187
PcyM_1212200	-2.48549	1.27217	Sz	0.556816	0.0894083
PcyM_0530000	-2.48562	1.38955	Sz	58.0237	9.43942
PcyM_1142500	-2.48603	1.22318	Sz	130.083	20.758
PcyM_1146500	-2.48632	0.91259	Sz	0.783668	0.115728
PcyM_0946300	-2.48642	1.06829	Sz	19.6775	3.02242
PcyM_1208100	-2.48702	1.90614	Sz	63.1203	10.6017
PcyM_0116000	-2.48913	0.99895	Sz	60.5428	9.26918
PcyM_0509100	-2.49168	0.947958	Sz	33.6186	5.06861
PcyM_1346600	-2.49291	0.582878	Sz	9.9716	1.10031
PcyM_0603800	-2.49692	1.85327	Sz	195.362	32.4948
PcyM_1316700	-2.49794	1.08999	Sz	50.0536	7.73101
PcyM_0947800	-2.49977	0.78779	Sz	2.08816	0.283497
PcyM_1351200	-2.50273	1.06829	Sz	3.59215	0.557415
PcyM_0305900	-2.50348	1.1959	Sz	22.8067	3.57376
PcyM_0815900	-2.50365	1.18903	Sz	28.7548	4.49271
PcyM_0202700	-2.50504	0.677748	Sz	0.662606	0.0879444
PcyM_0728000	-2.50747	0.900997	Sz	5.17173	0.736829
PcyM_0950100	-2.51019	1.34303	Sz	66.8884	10.6184
PcyM_1249000	-2.51276	0.753398	Sz	16.6853	2.27057
PcyM_1104500	-2.51278	1.15619	Sz	7.84414	1.23634
PcyM_1311300	-2.51346	1.17782	Sz	6.27036	0.971433
PcyM_1139800	-2.51444	0.862043	Sz	1.88593	0.27696
PcyM_1113500	-2.52164	1.25721	Sz	98.2726	15.2985
PcyM_0305000	-2.52227	1.20208	Sz	101.586	15.6828
PcyM_0323500	-2.5224	1.03669	Sz	1.96597	0.294405
PcyM_0938600	-2.52593	1.14251	Sz	11.1577	1.7051
PcyM_0730300	-2.52608	0.653256	Sz	1.87174	0.230102
PcyM_0530900	-2.52954	0.66529	Sz	4.59754	0.556337
PcyM_0210300	-2.53433	1.0387	Sz	19.6096	2.91345
PcyM_1234200	-2.53465	0.760691	Sz	2.80959	0.391694
PcyM_1466600	-2.53522	0.653172	Sz	12.2266	1.68448
PcyM_0304600	-2.53541	0.692854	Sz	2.86504	0.365037
PcyM_0619900	-2.53668	1.89509	Sz	15.7054	2.53061
PcyM_0929000	-2.54486	1.00795	Sz	12.4276	1.80777
PcyM_0903600	-2.54653	0.592637	Sz	0.586791	0.0717151
PcyM_0213000	-2.5478	1.07336	Sz	127.31	18.7656
PcyM_1265300	-2.54844	0.812387	Sz	14.9662	2.01567
PcyM_1308500	-2.54948	2.2906	Sz	216.898	35.2186
PcyM_0320700	-2.55104	1.44862	Sz	15.0397	2.338
PcyM_0708000	-2.55108	1.14546	Sz	13.2031	1.95943
PcyM_1326200	-2.55184	1.79784	Sz	34.707	5.51791
PcyM_1430000	-2.55289	0.917306	Sz	9.3575	1.31605
PcyM_1119200	-2.55346	0.954431	Sz	0.955931	0.13381
PcyM_0503600	-2.55383	1.89175	Sz	71.7262	11.4913
PcyM_0936100	-2.55405	1.52163	Sz	96.6501	15.0289
PcyM_0623600	-2.55446	1.78301	Sz	206	32.683
PcyM_0720400	-2.55612	1.63614	Sz	33.4648	5.24656
PcyM_1475200	-2.55923	1.42786	Sz	90.2483	13.8128
PcyM_1444400	-2.55936	1.04723	Sz	7.89789	1.15964
PcyM_0603300	-2.55939	0.938253	Sz	25.6879	3.61413
PcyM_0946100	-2.55981	0.886058	Sz	24.7361	3.39611
PcyM_1211700	-2.56101	1.50968	Sz	94.4432	14.5991
PcyM_1114400	-2.56212	0.679632	Sz	6.38628	0.720956
PcyM_0311200	-2.56405	0.951393	Sz	9.28195	1.33019
PcyM_1225600	-2.56464	1.12418	Sz	18.5663	2.72385
PcyM_0908700	-2.56473	0.787055	Sz	37.8673	4.94085
PcyM_1006200	-2.56536	2.07712	Sz	34.7027	5.53943
PcyM_0403300	-2.56536	2.08508	Sz	77.2277	12.3116
PcyM_0926800	-2.56572	1.05633	Sz	10.3363	1.49244
PcyM_0533400	-2.56608	0.83468	Sz	7.85224	1.05273
PcyM_1026400	-2.56636	0.656679	Sz	0.573322	0.0691359
PcyM_0839300	-2.56802	1.09193	Sz	46.391	6.94614
PcyM_1335100	-2.56834	1.28883	Sz	24.1109	3.6206
PcyM_1001100	-2.56839	2.11021	Sz	194.771	30.9632
PcyM_0313400	-2.56989	1.21019	Sz	3.25663	0.484459
PcyM_0722200	-2.57171	1.77379	Sz	4.22571	0.661863
PcyM_1103400	-2.57242	1.24132	Sz	27.4533	4.08828
PcyM_0702300	-2.57555	0.956059	Sz	0.518103	0.0721976
PcyM_1006300	-2.57856	0.82346	Sz	5.74595	0.754314
PcyM_1111300	-2.58074	1.34521	Sz	206.438	30.906
PcyM_0837700	-2.58091	1.09354	Sz	29.1901	4.20501
PcyM_0810400	-2.58217	1.10534	Sz	11.9399	1.72285
PcyM_1148600	-2.58247	0.933368	Sz	3.92229	0.535809
PcyM_1460700	-2.58421	2.30125	Sz	515.546	81.5569
PcyM_0112700	-2.58511	1.88283	Sz	49.5869	7.71604
PcyM_1453400	-2.58605	1.15376	Sz	70.3234	10.2009
PcyM_1217700	-2.58658	0.744661	Sz	23.0318	2.97193
PcyM_0614500	-2.5866	1.1388	Sz	4.40461	0.632704
PcyM_1245200	-2.59079	1.05033	Sz	22.6552	3.1899
PcyM_0927800	-2.59199	0.882113	Sz	1.56814	0.209527
PcyM_0410200	-2.59217	0.869246	Sz	32.1288	4.26011
PcyM_0103300	-2.59413	1.29066	Sz	23.6639	3.48088
PcyM_0934800	-2.59472	0.680552	Sz	14.44	1.61357
PcyM_1220100	-2.5957	2.10503	Sz	60.4139	9.4206
PcyM_1011800	-2.59624	0.944482	Sz	70.3233	9.56805
PcyM_0316600	-2.59745	1.04723	Sz	21.714	3.02445
PcyM_1263700	-2.59773	1.05101	Sz	8.28063	1.16138
PcyM_0217600	-2.59856	1.29484	Sz	22.8836	3.38855
PcyM_0925600	-2.60448	1.07607	Sz	15.4841	2.1719
PcyM_1331700	-2.60624	1.27458	Sz	26.1951	3.79502
PcyM_0611500	-2.60706	1.09886	Sz	2.84587	0.407292
PcyM_1465700	-2.60896	1.00537	Sz	21.7297	2.98429
PcyM_1149300	-2.61251	1.14833	Sz	48.6596	6.86452
PcyM_1433200	-2.61345	0.882997	Sz	18.4823	2.41415
PcyM_1409200	-2.61633	1.02446	Sz	1.9325	0.265851
PcyM_1454900	-2.61658	1.97687	Sz	90.1367	13.7546
PcyM_0200300	-2.61695	0.659661	Sz	2.81242	0.308697
PcyM_0801900	-2.62112	1.60291	Sz	568.464	84.4764
PcyM_0533100	-2.62209	0.668611	Sz	1.21615	0.138431
PcyM_0820200	-2.62219	0.835067	Sz	19.9933	2.5528
PcyM_1137000	-2.62259	1.84215	Sz	115.099	17.3183
PcyM_1145900	-2.62338	1.17404	Sz	117.986	16.6102
PcyM_1238100	-2.62523	1.06747	Sz	2.92029	0.397244
PcyM_0941900	-2.62597	1.0871	Sz	10.0518	1.39018
PcyM_0113300	-2.63241	1.1321	Sz	1.72357	0.241822
PcyM_0511700	-2.63298	1.89295	Sz	209.232	31.3728
PcyM_1428500	-2.6421	1.32813	Sz	51.3444	7.29722
PcyM_1120900	-2.64721	0.662049	Sz	1.40137	0.133795
PcyM_0509000	-2.65046	1.05629	Sz	217.411	29.07
PcyM_1275800	-2.65062	1.36377	Sz	8.54499	1.21335
PcyM_0823500	-2.65125	0.651416	Sz	0.437093	0.0435911
PcyM_0512300	-2.65271	1.41377	Sz	61.2865	8.78519
PcyM_0209300	-2.65354	2.2507	Sz	43.3644	6.49914
PcyM_1469000	-2.65354	1.67322	Sz	29.3766	4.27339
PcyM_0516200	-2.6555	1.33893	Sz	6.80055	0.946512
PcyM_1444900	-2.66015	1.00668	Sz	9.15895	1.21585
PcyM_0521800	-2.66225	1.49829	Sz	20.7506	2.96115
PcyM_1014700	-2.66256	1.35464	Sz	14.3604	2.04589
PcyM_1015300	-2.66361	1.36153	Sz	138.3	19.3574
PcyM_1244900	-2.66403	1.86145	Sz	107.765	15.8104
PcyM_1434400	-2.66421	1.3292	Sz	169.566	23.6367
PcyM_1448600	-2.66822	1.17583	Sz	48.8436	6.62719
PcyM_1112900	-2.66827	0.644823	Sz	3.69452	0.411473
PcyM_1302200	-2.67236	1.48503	Sz	206.082	29.076
PcyM_1227900	-2.6726	1.89956	Sz	139.561	20.3167
PcyM_0119400	-2.67305	1.23971	Sz	29.1888	3.97831
PcyM_0521900	-2.67454	1.27308	Sz	82.3786	11.3078
PcyM_0508100	-2.67563	2.12365	Sz	174.981	25.7071
PcyM_1412000	-2.67608	1.16809	Sz	167.783	22.5384
PcyM_1347000	-2.68299	1.26327	Sz	28.5938	3.87867
PcyM_1315400	-2.68322	2.03774	Sz	28.2526	4.1077
PcyM_0719300	-2.68405	1.43074	Sz	16.4622	2.28227
PcyM_0709500	-2.68545	0.683729	Sz	3.10184	0.345929
PcyM_1219300	-2.6859	1.15499	Sz	82.228	10.9876
PcyM_1130600	-2.68937	0.947452	Sz	33.0535	4.10845
PcyM_0922300	-2.68962	0.83432	Sz	1.13046	0.127475
PcyM_0912800	-2.69047	1.32411	Sz	28.4854	3.86538
PcyM_1267800	-2.69066	1.55013	Sz	43.5297	6.08525
PcyM_0936800	-2.69099	1.78203	Sz	12.8604	1.83534
PcyM_0323700	-2.69322	1.22048	Sz	1.3593	0.17807
PcyM_1469100	-2.69356	0.964263	Sz	2.39375	0.299157
PcyM_0607600	-2.69476	0.836683	Sz	20.1143	2.1129
PcyM_1421500	-2.69774	1.901	Sz	11.5247	1.64339
PcyM_1102100	-2.70298	0.760691	Sz	4.05791	0.412472
PcyM_0209600	-2.70315	1.25872	Sz	3.11023	0.412753
PcyM_1214200	-2.70444	1.1166	Sz	67.5567	8.7809
PcyM_1277700	-2.70612	1.7458	Sz	68.2072	9.5755
PcyM_0805200	-2.70805	0.968347	Sz	30.5562	3.78594
PcyM_1336800	-2.70817	2.36174	Sz	104.534	15.1016
PcyM_1466000	-2.70887	1.75855	Sz	91.5207	12.7883
PcyM_1460100	-2.70935	1.26814	Sz	10.0216	1.34926
PcyM_0619500	-2.7107	1.889	Sz	82.7482	11.7049
PcyM_1461200	-2.71234	1.87484	Sz	11.1394	1.56983
PcyM_0710400	-2.71265	1.22453	Sz	27.6084	3.62689
PcyM_0839700	-2.7137	0.765181	Sz	8.90467	1.02571
PcyM_0914400	-2.71562	1.59958	Sz	239.685	32.9886
PcyM_1241900	-2.71587	2.13496	Sz	26.0251	3.69806
PcyM_1407500	-2.71781	0.588448	Sz	73.269	5.90054
PcyM_1242400	-2.71807	1.6592	Sz	604.253	83.4701
PcyM_0946600	-2.71947	0.991808	Sz	0.870497	0.109409
PcyM_0424700	-2.72038	0.797746	Sz	8.48764	0.835326
PcyM_1319900	-2.72371	1.86799	Sz	53.3103	7.43164
PcyM_1422700	-2.72476	1.25753	Sz	40.7047	5.29531
PcyM_0619000	-2.72682	1.29295	Sz	8.76377	1.14473
PcyM_0920600	-2.72734	0.719806	Sz	4.34929	0.435468
PcyM_0930800	-2.72768	1.22128	Sz	126.899	16.4519
PcyM_MT02000	-2.73251	1.39865	Sz	70.9062	9.29728
PcyM_0706600	-2.73403	0.968483	Sz	48.2548	5.83991
PcyM_1471500	-2.73415	1.58665	Sz	60.7865	8.20847
PcyM_0705500	-2.73463	0.894778	Sz	3.04486	0.356632
PcyM_1020300	-2.73596	1.21997	Sz	467.602	60.1995
PcyM_1121000	-2.73666	1.51313	Sz	62.8442	8.43072
PcyM_0208300	-2.74052	1.32018	Sz	42.0832	5.47655
PcyM_0510200	-2.74117	0.702706	Sz	1.76284	0.165971
PcyM_1246600	-2.7428	0.846238	Sz	0.903916	0.103298
PcyM_1255500	-2.7429	1.80196	Sz	64.9644	8.89039
PcyM_1019500	-2.74395	1.23472	Sz	53.5865	6.87315
PcyM_1252800	-2.74397	1.42731	Sz	17.4007	2.29278
PcyM_1142400	-2.74854	2.3343	Sz	78.8799	11.0288
PcyM_0710200	-2.7486	1.32813	Sz	3.18356	0.415812
PcyM_1144400	-2.74958	1.84504	Sz	38.429	5.24941
PcyM_1139300	-2.74961	1.42	Sz	30.2229	4.04283
PcyM_1411100	-2.7522	1.39572	Sz	101.162	13.2388
PcyM_1323400	-2.75293	0.893679	Sz	1.1933	0.132344
PcyM_0121600	-2.75417	1.76385	Sz	46.8741	6.33905
PcyM_1458000	-2.75473	1.50918	Sz	5.04044	0.65978
PcyM_1217100	-2.75507	1.43719	Sz	52.7879	6.98234
PcyM_0317300	-2.75824	1.22761	Sz	0.565873	0.0711925
PcyM_1429900	-2.75851	2.03638	Sz	35.6651	4.88949
PcyM_1274200	-2.75864	1.4764	Sz	55.179	7.21539
PcyM_1339200	-2.76017	1.57141	Sz	46.4225	6.14171
PcyM_0112500	-2.76057	1.00688	Sz	2.19395	0.258547
PcyM_0526300	-2.76288	1.61215	Sz	51.7022	6.88482
PcyM_1010400	-2.76333	1.00102	Sz	9.30439	1.12217
PcyM_0907500	-2.76431	1.60748	Sz	11.693	1.54345
PcyM_1264400	-2.76546	1.95032	Sz	138.353	18.7716
PcyM_0935300	-2.76762	1.60984	Sz	35.9625	4.75272
PcyM_0729100	-2.77008	1.79057	Sz	263.549	35.2571
PcyM_0944600	-2.77016	1.27356	Sz	19.752	2.49713
PcyM_0708900	-2.77343	1.77563	Sz	127.87	17.0611
PcyM_0931600	-2.77608	0.77239	Sz	6.18334	0.591355
PcyM_1470600	-2.77729	1.04137	Sz	9.68596	1.14397
PcyM_0925200	-2.77798	0.998704	Sz	10.8763	1.19542
PcyM_0108300	-2.77812	1.15118	Sz	2.73256	0.321235
PcyM_0110800	-2.77867	0.784657	Sz	6.40231	0.552111
PcyM_0705300	-2.78042	1.9225	Sz	17.0814	2.28765
PcyM_1429700	-2.78277	2.11612	Sz	12.4135	1.67881
PcyM_1414800	-2.7838	1.78792	Sz	124.952	16.5267
PcyM_1428200	-2.7843	1.91679	Sz	75.4766	10.0559
PcyM_1131600	-2.78767	1.37954	Sz	8.13406	1.03203
PcyM_1405000	-2.7922	1.53248	Sz	68.0814	8.73481
PcyM_1426100	-2.79267	2.69154	Sz	80.67	11.0275
PcyM_1123600	-2.79323	1.24014	Sz	17.0194	2.14106
PcyM_0408200	-2.79482	1.30052	Sz	12.015	1.49379
PcyM_1333700	-2.79575	0.936832	Sz	16.5147	1.83552
PcyM_0305200	-2.79681	0.708072	Sz	1.09556	0.100965
PcyM_1276500	-2.79705	0.991482	Sz	2.1679	0.238248
PcyM_1471000	-2.79765	1.87484	Sz	139.264	18.3318
PcyM_1463800	-2.79853	2.54881	Sz	149.824	20.2971
PcyM_1005100	-2.80245	1.5595	Sz	59.6641	7.62193
PcyM_1474500	-2.80385	1.10941	Sz	27.0784	3.14744
PcyM_1439100	-2.80392	0.816622	Sz	8.39764	0.868995
PcyM_0721900	-2.80863	1.19205	Sz	41.3983	4.94098
PcyM_1138700	-2.80953	2.12714	Sz	331.898	43.9101
PcyM_0735800	-2.81064	0.954654	Sz	2.26116	0.257084
PcyM_0530100	-2.81091	1.61496	Sz	2.69843	0.345571
PcyM_0524500	-2.8153	1.09069	Sz	9.431	1.09496
PcyM_0215100	-2.81558	1.00157	Sz	32.305	3.6049
PcyM_0531600	-2.81583	1.25123	Sz	11.4917	1.36519
PcyM_1145300	-2.81757	1.43389	Sz	90.3606	11.2372
PcyM_1412700	-2.8215	1.57669	Sz	91.8566	11.5339
PcyM_1422300	-2.82183	1.0431	Sz	9.48279	1.08767
PcyM_0321800	-2.82192	1.44157	Sz	108.897	13.4623
PcyM_1026800	-2.82249	1.53088	Sz	76.3624	9.55083
PcyM_1316800	-2.82413	1.90645	Sz	51.5118	6.66205
PcyM_0515100	-2.82582	1.09354	Sz	25.3625	2.9
PcyM_1007900	-2.8286	0.958068	Sz	24.9323	2.6283
PcyM_1220000	-2.82893	2.09343	Sz	21.0325	2.74562
PcyM_1308400	-2.83039	1.70255	Sz	7.2118	0.911289
PcyM_1456300	-2.8335	0.831108	Sz	1.93859	0.192157
PcyM_0813300	-2.83481	1.76961	Sz	53.919	6.83896
PcyM_0620700	-2.83568	0.822155	Sz	1.69751	0.158055
PcyM_0623300	-2.83574	1.35924	Sz	9.06786	1.1029
PcyM_1440400	-2.83768	0.847868	Sz	0.317576	0.0324913
PcyM_1225800	-2.83847	0.734931	Sz	0.342055	0.0329085
PcyM_0116100	-2.84088	0.809279	Sz	1.79762	0.164637
PcyM_0504500	-2.8448	1.12546	Sz	0.816916	0.090207
PcyM_0510100	-2.84565	1.93384	Sz	40.1905	5.10062
PcyM_1454700	-2.84739	1.67107	Sz	24.0519	2.99534
PcyM_0323300	-2.84852	1.95613	Sz	97.9543	12.4271
PcyM_0313300	-2.85051	1.87995	Sz	17.2477	2.1736
PcyM_1004100	-2.85107	1.27009	Sz	59.4938	6.92338
PcyM_0054800	-2.85547	1.33856	Sz	59.1337	6.99414
PcyM_1233300	-2.85891	1.51091	Sz	93.9491	11.4099
PcyM_1021500	-2.85896	1.3692	Sz	21.0643	2.49029
PcyM_0624700	-2.85914	1.19865	Sz	25.3097	2.88619
PcyM_1437800	-2.86217	2.53364	Sz	134.553	17.3723
PcyM_0218700	-2.86366	1.62498	Sz	38.8541	4.75579
PcyM_0721100	-2.86382	0.873166	Sz	2.92518	0.292237
PcyM_0841300	-2.86437	1.30307	Sz	5.36093	0.625413
PcyM_1108600	-2.86534	1.2314	Sz	7.10473	0.817253
PcyM_1327900	-2.86778	0.662689	Sz	11.7268	0.931661
PcyM_0120200	-2.87032	1.64022	Sz	48.5204	5.89804
PcyM_1262300	-2.87356	0.786226	Sz	2.50735	0.252392
PcyM_1242800	-2.87509	1.04942	Sz	9.46382	1.00829
PcyM_1001500	-2.87533	0.944331	Sz	7.08873	0.766906
PcyM_1411300	-2.87627	2.25231	Sz	23.1987	2.93183
PcyM_1279200	-2.87695	1.33818	Sz	8.72872	1.01153
PcyM_0948700	-2.88096	1.46945	Sz	76.4834	9.02574
PcyM_0818600	-2.88294	2.16556	Sz	365.923	45.784
PcyM_1231400	-2.88342	1.25274	Sz	45.8118	5.20906
PcyM_1415000	-2.88395	2.07846	Sz	157.334	19.4517
PcyM_1457800	-2.88399	1.85506	Sz	16.7837	2.05962
PcyM_0102600	-2.88705	1.4321	Sz	11.1409	1.30312
PcyM_0930000	-2.88718	1.5864	Sz	15.538	1.85865
PcyM_0820900	-2.88805	0.802558	Sz	1.81159	0.175449
PcyM_0103500	-2.89069	1.79384	Sz	39.5063	4.80042
PcyM_1228700	-2.89094	1.43347	Sz	66.0064	7.72433
PcyM_0107500	-2.89324	1.02994	Sz	23.0071	2.41466
PcyM_1253500	-2.89489	0.735541	Sz	1.89794	0.162159
PcyM_0818500	-2.89581	1.66652	Sz	41.7262	4.98929
PcyM_1251900	-2.89924	0.887105	Sz	7.57023	0.761485
PcyM_1437500	-2.89959	1.75635	Sz	59.1838	7.10348
PcyM_0307600	-2.90072	1.889	Sz	26.1964	3.18006
PcyM_0118200	-2.90109	1.31163	Sz	4.15508	0.471541
PcyM_0834200	-2.90177	1.34385	Sz	2.92057	0.331338
PcyM_1318700	-2.90454	2.04901	Sz	82.7781	10.2194
PcyM_0934700	-2.90631	1.23114	Sz	2.22992	0.256463
PcyM_0823700	-2.90874	1.13668	Sz	0.271451	0.0295685
PcyM_1417400	-2.91066	2.16482	Sz	145.913	17.835
PcyM_0325400	-2.91071	1.43604	Sz	28.6498	3.27653
PcyM_0111400	-2.91126	2.12207	Sz	88.1686	10.7662
PcyM_0108200	-2.91172	1.17595	Sz	0.793548	0.0825927
PcyM_0620600	-2.91192	1.18137	Sz	2.9968	0.332102
PcyM_1223500	-2.91264	1.38914	Sz	7.42627	0.844542
PcyM_1269500	-2.91415	1.10711	Sz	6.93685	0.72906
PcyM_1149800	-2.9167	1.12139	Sz	36.8457	3.90634
PcyM_1137300	-2.91696	1.1456	Sz	23.221	2.48963
PcyM_0602300	-2.92315	1.75591	Sz	8.95763	1.04969
PcyM_0406600	-2.92707	0.827159	Sz	0.220147	0.0212372
PcyM_1345000	-2.9286	2.43739	Sz	64.2922	7.86442
PcyM_0421100	-2.9291	0.891465	Sz	2.30974	0.230252
PcyM_1242200	-2.93082	2.05188	Sz	239.601	28.728
PcyM_1018100	-2.93388	2.84336	Sz	95.9698	11.8311
PcyM_0718200	-2.93535	1.37903	Sz	122.914	13.675
PcyM_0939100	-2.93625	1.83557	Sz	7.04787	0.830626
PcyM_0715200	-2.93975	2.29603	Sz	332.425	40.0251
PcyM_1120100	-2.9406	1.86859	Sz	12.552	1.48023
PcyM_1110000	-2.94198	0.993903	Sz	10.6684	1.04755
PcyM_1467100	-2.94842	1.47554	Sz	43.0073	4.7927
PcyM_0306500	-2.94889	0.919354	Sz	13.3319	1.21515
PcyM_0937200	-2.95038	1.23088	Sz	20.2678	2.16265
PcyM_1474100	-2.95431	2.08536	Sz	12.0891	1.42282
PcyM_1268000	-2.95795	0.705666	Sz	0.298694	0.0228005
PcyM_1447400	-2.95851	1.64411	Sz	38.9475	4.40556
PcyM_0804000	-2.95895	2.58061	Sz	190.874	22.9135
PcyM_0732400	-2.96037	0.799339	Sz	0.692132	0.056877
PcyM_0608700	-2.96276	1.61436	Sz	24.2751	2.70478
PcyM_0407600	-2.96361	1.13834	Sz	25.2366	2.57222
PcyM_0711800	-2.96415	1.44329	Sz	32.6991	3.58703
PcyM_0403500	-2.96456	1.78532	Sz	108.436	12.4023
PcyM_0119000	-2.9646	1.49712	Sz	278.458	30.8591
PcyM_0531900	-2.96526	2.20042	Sz	186.892	21.9794
PcyM_1310900	-2.96827	0.887034	Sz	1.38345	0.126356
PcyM_1101800	-2.96865	1.09078	Sz	16.4039	1.6987
PcyM_1118700	-2.96966	2.70129	Sz	158.566	18.9492
PcyM_1460300	-2.97056	1.00869	Sz	3.09596	0.297291
PcyM_1113400	-2.9709	1.21311	Sz	2.68715	0.276751
PcyM_1263800	-2.97188	1.71503	Sz	17.7479	2.0346
PcyM_1114800	-2.97193	1.07193	Sz	6.56716	0.654444
PcyM_0507300	-2.97535	1.76509	Sz	5.4753	0.617999
PcyM_0620200	-2.97583	1.57224	Sz	201.223	22.2425
PcyM_1138200	-2.97676	1.07567	Sz	25.7903	2.61265
PcyM_1452700	-2.97781	2.35084	Sz	73.7584	8.66832
PcyM_0217300	-2.97874	1.34521	Sz	40.8789	4.36189
PcyM_1022800	-2.9818	2.23901	Sz	35.8072	4.15811
PcyM_0939000	-2.9869	1.66574	Sz	18.3042	2.02588
PcyM_1005500	-2.98761	2.44208	Sz	149.371	17.4788
PcyM_1266100	-2.9883	1.19308	Sz	23.2448	2.35606
PcyM_1021200	-2.98986	1.4339	Sz	23.8708	2.55248
PcyM_1458700	-2.99192	2.10444	Sz	42.6181	4.88483
PcyM_0514600	-2.99254	1.2683	Sz	2.56485	0.271886
PcyM_0818100	-2.99314	1.91593	Sz	79.8519	9.01381
PcyM_1271100	-2.99403	1.31186	Sz	100.61	10.4435
PcyM_0619800	-2.99421	1.02613	Sz	2.81312	0.2575
PcyM_1459400	-2.99936	1.18553	Sz	44.5281	4.38682
PcyM_0611700	-2.9997	1.16077	Sz	8.53646	0.848119
PcyM_1246000	-3.00018	1.49309	Sz	7.65789	0.828748
PcyM_0908200	-3.00027	2.05983	Sz	85.2644	9.7302
PcyM_1454100	-3.00115	1.72932	Sz	17.4944	1.95819
PcyM_1262400	-3.00298	2.36088	Sz	194.419	22.3694
PcyM_0621600	-3.00401	0.786102	Sz	6.27259	0.497637
PcyM_1228400	-3.00734	1.78642	Sz	15.7571	1.74753
PcyM_1236400	-3.0088	1.25231	Sz	7.37172	0.748356
PcyM_1275000	-3.0102	1.12318	Sz	3.94285	0.360984
PcyM_0813600	-3.01044	1.79863	Sz	44.8343	4.94226
PcyM_1108400	-3.0107	1.32335	Sz	38.6712	3.99338
PcyM_1010000	-3.01076	1.77144	Sz	9.83041	1.08647
PcyM_0823100	-3.01567	1.29408	Sz	27.552	2.83127
PcyM_0910000	-3.01587	2.31367	Sz	58.1667	6.60799
PcyM_1470700	-3.01716	1.69125	Sz	52.1028	5.64984
PcyM_0509800	-3.01768	1.49174	Sz	33.5641	3.59534
PcyM_1438800	-3.01768	1.88812	Sz	124.763	13.7711
PcyM_1307500	-3.01775	1.43259	Sz	12.6171	1.31952
PcyM_1118600	-3.01812	1.50567	Sz	5.07864	0.53845
PcyM_1145500	-3.01926	1.74115	Sz	1.5571	0.16924
PcyM_0937600	-3.01957	1.3511	Sz	40.6579	4.15601
PcyM_1015700	-3.02036	1.6564	Sz	1.97765	0.214604
PcyM_0522900	-3.0207	1.51841	Sz	26.4579	2.80807
PcyM_0119700	-3.02133	2.31828	Sz	50.0654	5.65757
PcyM_1471800	-3.02411	1.09853	Sz	5.99232	0.570467
PcyM_0839800	-3.02662	1.77608	Sz	64.0874	6.94599
PcyM_1030400	-3.02722	2.02833	Sz	13.7367	1.52062
PcyM_1130800	-3.02785	1.64594	Sz	22.3884	2.39514
PcyM_1123700	-3.03034	1.4406	Sz	12.2765	1.26411
PcyM_1310400	-3.03166	2.23326	Sz	433.473	48.4479
PcyM_0120800	-3.03187	2.56375	Sz	20.2255	2.29297
PcyM_0517500	-3.03203	1.5068	Sz	67.2668	7.05102
PcyM_0815200	-3.03291	1.27846	Sz	11.8748	1.1711
PcyM_1465500	-3.03306	2.34626	Sz	9.63661	1.08856
PcyM_1120300	-3.03416	1.42305	Sz	136.104	14.0115
PcyM_0814800	-3.0343	1.4414	Sz	0.839336	0.0885822
PcyM_1271700	-3.03498	1.62213	Sz	15.7675	1.66955
PcyM_1468600	-3.03541	1.94923	Sz	60.945	6.6701
PcyM_1340900	-3.03559	0.786975	Sz	0.767111	0.059063
PcyM_0069300	-3.03659	1.0846	Sz	39.9486	3.33354
PcyM_1274400	-3.03731	1.47297	Sz	10.1823	1.05718
PcyM_1244200	-3.0377	1.67941	Sz	32.0767	3.4178
PcyM_0407400	-3.04101	2.36818	Sz	10.6329	1.19009
PcyM_1114300	-3.04321	2.48371	Sz	29.732	3.33188
PcyM_1430400	-3.045	1.31469	Sz	60.9489	6.06106
PcyM_1205000	-3.04887	1.5813	Sz	65.4052	6.6702
PcyM_1225500	-3.04949	1.81161	Sz	249.325	26.5901
PcyM_1032300	-3.05546	1.58074	Sz	4.12907	0.42456
PcyM_0216700	-3.05561	1.31755	Sz	7.92403	0.787533
PcyM_0207000	-3.05593	1.15459	Sz	42.6835	3.9638
PcyM_1306800	-3.05605	1.24713	Sz	15.7863	1.53213
PcyM_1332800	-3.05633	0.918404	Sz	10.0578	0.839392
PcyM_0825700	-3.05788	2.86644	Sz	141.135	15.8318
PcyM_1457700	-3.0586	1.48418	Sz	3.71936	0.382443
PcyM_1007500	-3.05905	1.37408	Sz	46.9306	4.66725
PcyM_1254200	-3.06099	1.52309	Sz	69.5445	7.10082
PcyM_0923900	-3.06428	1.8576	Sz	69.1366	7.31773
PcyM_1113200	-3.0663	1.03276	Sz	3.84406	0.362061
PcyM_1134600	-3.06647	1.18588	Sz	6.8185	0.609585
PcyM_0110400	-3.06763	2.99054	Sz	162.603	18.1828
PcyM_0700600	-3.06766	2.13488	Sz	46.6557	5.05507
PcyM_0949300	-3.06866	1.61551	Sz	80.1563	8.23394
PcyM_0936000	-3.06893	2.65985	Sz	319.935	35.405
PcyM_1256600	-3.06955	1.33592	Sz	33.2271	3.25151
PcyM_1212000	-3.07167	2.07598	Sz	28.0021	3.02444
PcyM_1207300	-3.07203	1.14807	Sz	45.4344	4.18987
PcyM_1468700	-3.07316	0.997687	Sz	18.9924	1.5496
PcyM_0113700	-3.07353	0.903016	Sz	0.653982	0.0518388
PcyM_1276400	-3.07428	1.34425	Sz	139.454	13.5088
PcyM_1017800	-3.07445	0.811233	Sz	0.445933	0.028057
PcyM_1140400	-3.07663	1.09285	Sz	4.00182	0.357309
PcyM_1410700	-3.07686	1.41056	Sz	33.6829	3.34058
PcyM_1002900	-3.07834	1.9829	Sz	31.9697	3.38709
PcyM_0521700	-3.07917	3.18833	Sz	452.222	50.4062
PcyM_1351600	-3.07919	1.48022	Sz	30.2663	3.00689
PcyM_1458800	-3.08127	1.37013	Sz	2.03451	0.185429
PcyM_1469200	-3.08151	1.36321	Sz	20.0048	1.9654
PcyM_1261100	-3.08179	1.69511	Sz	47.0127	4.83754
PcyM_0412600	-3.08226	1.33293	Sz	2.19422	0.214459
PcyM_0729700	-3.08491	0.990808	Sz	15.0833	1.22048
PcyM_1240400	-3.08519	0.929947	Sz	1.432	0.119102
PcyM_0927000	-3.08565	1.52616	Sz	3.07895	0.307329
PcyM_1216800	-3.0878	1.7765	Sz	69.3507	7.15159
PcyM_1109000	-3.08864	1.54948	Sz	1.79356	0.178076
PcyM_1207000	-3.08993	2.30804	Sz	17.2473	1.84496
PcyM_1457900	-3.09029	1.70026	Sz	30.3017	3.08422
PcyM_1438700	-3.0904	1.34927	Sz	28.5398	2.64373
PcyM_0719600	-3.09195	2.2577	Sz	313.325	33.3612
PcyM_1254100	-3.09333	1.37768	Sz	12.891	1.24322
PcyM_1001200	-3.09534	2.26909	Sz	53.9116	5.73599
PcyM_0309500	-3.09634	2.72425	Sz	869.855	94.4234
PcyM_1120500	-3.09736	2.6599	Sz	355.324	38.4584
PcyM_0838000	-3.09805	2.58471	Sz	59.5103	6.42682
PcyM_0204700	-3.10024	2.17131	Sz	37.3483	3.9341
PcyM_0937800	-3.10198	1.14552	Sz	68.2625	6.10839
PcyM_1221300	-3.10362	1.92818	Sz	29.2467	3.01996
PcyM_1314600	-3.10495	1.92273	Sz	54.4836	5.62269
PcyM_0418400	-3.10906	1.45821	Sz	3.59609	0.345004
PcyM_1213900	-3.11018	1.02022	Sz	28.1653	2.16977
PcyM_1227200	-3.11018	0.9735	Sz	4.07446	0.319995
PcyM_1330100	-3.1156	1.43497	Sz	2.09514	0.202774
PcyM_1011600	-3.11807	2.76657	Sz	49.2274	5.27252
PcyM_1302600	-3.11947	1.17311	Sz	16.5799	1.48664
PcyM_0105700	-3.12111	0.818735	Sz	1.22524	0.0978738
PcyM_1264300	-3.1217	1.52954	Sz	64.7397	6.29744
PcyM_0736600	-3.12216	1.20614	Sz	3.68524	0.331708
PcyM_0914000	-3.12396	2.7872	Sz	130.522	13.9065
PcyM_0920200	-3.12439	1.42613	Sz	79.6034	7.5391
PcyM_0623500	-3.12602	1.85385	Sz	87.5208	8.76674
PcyM_1132800	-3.12647	3.26476	Sz	7158.88	771.439
PcyM_0510700	-3.12658	1.93492	Sz	10.9297	1.10612
PcyM_0805000	-3.12855	2.18669	Sz	44.4488	4.58204
PcyM_1447800	-3.12993	2.8202	Sz	243.028	25.8137
PcyM_0724500	-3.13323	3.31056	Sz	532.603	57.1737
PcyM_1240600	-3.13401	1.43359	Sz	36.0109	3.39465
PcyM_0906800	-3.13899	3.24325	Sz	4208.65	449.067
PcyM_0321100	-3.13934	1.05887	Sz	9.52816	0.76246
PcyM_0119200	-3.14258	1.35134	Sz	12.1118	1.11579
PcyM_1409800	-3.14289	1.44059	Sz	12.1823	1.14063
PcyM_0737000	-3.1457	1.49958	Sz	17.7104	1.66882
PcyM_0929500	-3.14599	2.03545	Sz	60.6164	6.09517
PcyM_0614100	-3.14819	2.05188	Sz	114.036	11.4693
PcyM_0822600	-3.15141	1.07065	Sz	11.1587	0.91858
PcyM_1128700	-3.15163	1.00093	Sz	1.58154	0.128367
PcyM_0704900	-3.15207	3.15275	Sz	344.103	36.2948
PcyM_1456900	-3.15214	1.82836	Sz	245.731	24.1559
PcyM_1209300	-3.15232	1.55196	Sz	39.2502	3.72027
PcyM_1418700	-3.15317	1.83952	Sz	111.872	11.0064
PcyM_0109300	-3.15363	2.52353	Sz	125.803	12.9586
PcyM_1430300	-3.1542	3.16696	Sz	17.7004	1.86467
PcyM_0822400	-3.15676	0.864319	Sz	1.42231	0.118436
PcyM_1001900	-3.15709	2.13488	Sz	34.2208	3.44301
PcyM_1146800	-3.15782	1.59237	Sz	5.73556	0.54121
PcyM_1007600	-3.158	2.04901	Sz	128.557	12.8112
PcyM_1455700	-3.15875	1.51627	Sz	116.292	10.912
PcyM_0532600	-3.1601	3.01585	Sz	92.2837	9.64917
PcyM_1301400	-3.16027	1.13135	Sz	1.18553	0.104543
PcyM_0827500	-3.16123	1.85512	Sz	183.737	17.9151
PcyM_1016400	-3.16124	2.25887	Sz	59.9815	6.05587
PcyM_0310100	-3.16271	1.86094	Sz	23.2166	2.26778
PcyM_0817300	-3.16537	1.49205	Sz	6.26736	0.579802
PcyM_0532400	-3.16595	1.73886	Sz	22.2462	2.19989
PcyM_0510400	-3.16922	0.768558	Sz	3.56715	0.208028
PcyM_1144000	-3.16995	1.24573	Sz	152.115	13.2004
PcyM_1325900	-3.16995	1.26616	Sz	5.26832	0.46185
PcyM_1453500	-3.17047	1.25625	Sz	16.8016	1.46618
PcyM_0412900	-3.17181	1.30633	Sz	41.8473	3.64854
PcyM_0826900	-3.17342	1.2439	Sz	63.4739	5.53359
PcyM_0837500	-3.17733	2.72726	Sz	312.158	31.9568
PcyM_0731100	-3.17834	1.07572	Sz	0.514919	0.0421715
PcyM_1027700	-3.17889	2.98955	Sz	742.651	76.341
PcyM_0310300	-3.17987	2.49918	Sz	48.0504	4.85512
PcyM_1446200	-3.18023	1.77781	Sz	70.1231	6.73024
PcyM_0618800	-3.18084	2.57971	Sz	49.4555	5.00729
PcyM_0915100	-3.18111	1.80662	Sz	180.935	17.3622
PcyM_0911100	-3.18121	1.62427	Sz	3.36208	0.31364
PcyM_1425500	-3.18143	1.95871	Sz	246.356	23.936
PcyM_0622400	-3.18241	1.26598	Sz	2.50882	0.214924
PcyM_1455200	-3.18491	1.28883	Sz	1.43159	0.124531
PcyM_1469500	-3.18508	1.88085	Sz	170.806	16.261
PcyM_1218900	-3.18576	1.77224	Sz	57.075	5.43772
PcyM_1280600	-3.18675	1.60918	Sz	76.7636	7.132
PcyM_0908100	-3.18853	2.69008	Sz	227.272	22.95
PcyM_1104900	-3.18937	2.23614	Sz	24.6911	2.43715
PcyM_0310700	-3.19162	1.44306	Sz	3.67558	0.326344
PcyM_1307100	-3.1926	1.89298	Sz	51.2675	4.88424
PcyM_1210800	-3.1937	1.98944	Sz	38.5327	3.719
PcyM_0112000	-3.19443	2.02726	Sz	48.7888	4.77141
PcyM_1231100	-3.19445	2.14856	Sz	221.175	21.5759
PcyM_0827300	-3.19483	0.791073	Sz	0.379863	0.0210742
PcyM_1005700	-3.19695	1.4502	Sz	4.37339	0.390848
PcyM_0948300	-3.19726	1.3842	Sz	3.93119	0.349895
PcyM_1016800	-3.19863	1.47193	Sz	2.89822	0.26669
PcyM_0952000	-3.19889	2.35277	Sz	104.565	10.3074
PcyM_1207800	-3.20067	0.912641	Sz	2.69222	0.211356
PcyM_1320900	-3.20092	2.19653	Sz	11.5729	1.12318
PcyM_0622700	-3.20172	1.46316	Sz	23.1989	2.08222
PcyM_1225400	-3.20248	1.0382	Sz	0.423417	0.0330996
PcyM_1423800	-3.20256	2.83871	Sz	272.608	27.3892
PcyM_1256900	-3.2043	1.98605	Sz	26.6233	2.55198
PcyM_0937400	-3.20811	1.92353	Sz	329.746	31.2452
PcyM_1330600	-3.20895	1.64993	Sz	13.9662	1.27319
PcyM_0820100	-3.20973	1.80832	Sz	70.7386	6.61871
PcyM_0322200	-3.21221	1.19646	Sz	39.056	3.36602
PcyM_0411000	-3.21434	1.40098	Sz	7.86337	0.678007
PcyM_1031400	-3.21476	1.56499	Sz	10.8382	0.975198
PcyM_1318500	-3.21576	1.82265	Sz	38.1679	3.55606
PcyM_1223400	-3.21598	2.17642	Sz	68.1496	6.53827
PcyM_1470800	-3.21609	3.11819	Sz	770.084	77.2346
PcyM_1021400	-3.21914	1.47795	Sz	50.5227	4.48653
PcyM_0314600	-3.21933	1.18588	Sz	2.15748	0.178243
PcyM_1260600	-3.21995	1.51313	Sz	7.13394	0.636534
PcyM_0213100	-3.22347	2.40622	Sz	431.746	41.8911
PcyM_1146600	-3.22686	1.48402	Sz	20.7949	1.84765
PcyM_0623100	-3.22734	2.9888	Sz	331.86	32.8814
PcyM_0907600	-3.22981	1.86834	Sz	114.573	10.6264
PcyM_1025200	-3.23145	2.19679	Sz	65.7847	6.27795
PcyM_1031700	-3.23269	1.68017	Sz	4.66694	0.414757
PcyM_0942700	-3.23389	0.947452	Sz	3.72444	0.271237
PcyM_0317100	-3.2342	1.1373	Sz	11.9877	0.91985
PcyM_1466900	-3.23442	3.39301	Sz	2771.62	276.213
PcyM_0413800	-3.23637	1.99825	Sz	36.1981	3.37171
PcyM_1013500	-3.23652	1.32597	Sz	7.33297	0.616684
PcyM_0935800	-3.23687	2.31596	Sz	12.0697	1.15362
PcyM_0613300	-3.24084	1.1986	Sz	10.0874	0.851948
PcyM_0111000	-3.24134	1.83412	Sz	90.4227	8.23885
PcyM_1248400	-3.24137	2.78161	Sz	188.56	18.3185
PcyM_1123300	-3.24434	3.38159	Sz	199.936	19.7572
PcyM_1002800	-3.24444	1.46292	Sz	36.4505	3.18043
PcyM_0120500	-3.24581	1.70163	Sz	1.50431	0.137281
PcyM_0711700	-3.24666	1.72552	Sz	129.581	11.6507
PcyM_0416200	-3.24791	2.06962	Sz	170.49	15.8319
PcyM_0322900	-3.24834	2.20786	Sz	41.6265	3.9064
PcyM_1426000	-3.25092	3.52104	Sz	362.003	35.7371
PcyM_0918400	-3.25391	1.68541	Sz	69.1651	6.17888
PcyM_0509900	-3.25431	1.67189	Sz	43.8231	3.91151
PcyM_0114600	-3.25515	2.93788	Sz	32.1635	3.10892
PcyM_0818200	-3.25738	1.96608	Sz	85.9051	7.91362
PcyM_1132600	-3.25773	1.51091	Sz	22.571	1.95103
PcyM_1406300	-3.25775	2.90466	Sz	42.3098	4.07351
PcyM_0953200	-3.25828	2.00265	Sz	78.7836	7.21248
PcyM_1248200	-3.25854	2.15858	Sz	5.91283	0.547871
PcyM_0601000	-3.25889	1.31542	Sz	9.29953	0.732239
PcyM_1028100	-3.2597	1.79057	Sz	21.5556	1.9952
PcyM_0322800	-3.26094	2.50315	Sz	59.9977	5.70281
PcyM_0517100	-3.2611	1.44139	Sz	11.927	1.03543
PcyM_0204900	-3.26273	3.16211	Sz	402.308	38.9967
PcyM_0938900	-3.26398	2.12363	Sz	52.7316	4.8548
PcyM_1304900	-3.26404	1.02361	Sz	6.48164	0.463606
PcyM_1352600	-3.26436	1.60361	Sz	10.385	0.886957
PcyM_0719500	-3.26474	2.16321	Sz	13.0069	1.20441
PcyM_1348700	-3.26548	1.75964	Sz	40.4735	3.58631
PcyM_0701700	-3.26556	2.79879	Sz	211.37	20.2066
PcyM_0834500	-3.26626	2.06425	Sz	7.4349	0.682626
PcyM_1268900	-3.26629	1.69427	Sz	30.2396	2.65349
PcyM_1309000	-3.26724	2.02806	Sz	30.2147	2.75711
PcyM_1267600	-3.26774	2.56564	Sz	316.338	29.8887
PcyM_1031900	-3.26866	1.3914	Sz	1.10732	0.0925223
PcyM_1310600	-3.27035	1.81025	Sz	170.16	15.101
PcyM_1262100	-3.2704	1.59296	Sz	49.8897	4.1705
PcyM_1229900	-3.27042	1.87508	Sz	5.42806	0.483961
PcyM_0841200	-3.27305	2.69093	Sz	23.1987	2.18969
PcyM_1250100	-3.27306	1.89651	Sz	15.784	1.43367
PcyM_1005600	-3.27308	2.22471	Sz	101.891	9.40305
PcyM_0503100	-3.2735	3.10415	Sz	2125.9	204.005
PcyM_1009500	-3.27379	2.64532	Sz	228.411	21.5551
PcyM_1353200	-3.27421	1.93643	Sz	80.1424	7.06979
PcyM_1028400	-3.27444	2.12544	Sz	76.599	7.01275
PcyM_1319100	-3.27949	2.59133	Sz	356.606	33.4118
PcyM_0421800	-3.27952	1.39123	Sz	9.14202	0.733298
PcyM_1464300	-3.27963	1.48835	Sz	92.0645	7.69171
PcyM_1333600	-3.28	1.59872	Sz	10.976	0.943021
PcyM_0325500	-3.28172	1.42912	Sz	0.332973	0.027107
PcyM_0610700	-3.28203	1.9504	Sz	82.188	7.37491
PcyM_1348600	-3.28251	1.52102	Sz	16.4414	1.37094
PcyM_0842100	-3.28391	2.81768	Sz	76.8262	7.26474
PcyM_0921700	-3.28473	1.3646	Sz	19.7766	1.62014
PcyM_1135900	-3.2849	2.81025	Sz	137.489	12.9524
PcyM_0820300	-3.28594	1.65129	Sz	16.6159	1.41307
PcyM_1449700	-3.28677	1.31577	Sz	1.87168	0.15646
PcyM_0610800	-3.28746	2.79791	Sz	128.356	12.1072
PcyM_1302100	-3.28957	3.21063	Sz	75.1759	7.14955
PcyM_0413400	-3.29016	1.14546	Sz	0.900738	0.0582776
PcyM_1013900	-3.29178	1.38423	Sz	11.3226	0.919176
PcyM_0938100	-3.29549	1.08271	Sz	3.6351	0.266796
PcyM_0307200	-3.29611	1.80614	Sz	7.41462	0.644528
PcyM_0406300	-3.29622	1.76982	Sz	24.8973	2.14888
PcyM_0724600	-3.29669	1.98306	Sz	108.623	9.62608
PcyM_1429300	-3.29931	1.84131	Sz	47.7027	4.15155
PcyM_1463700	-3.30103	2.12251	Sz	72.4739	6.47549
PcyM_0914600	-3.30105	1.76087	Sz	187.989	16.1301
PcyM_0624900	-3.30224	2.05566	Sz	35.0284	3.12428
PcyM_1267000	-3.30258	1.6798	Sz	5.95159	0.505445
PcyM_0405400	-3.30315	1.95874	Sz	2.09389	0.180798
PcyM_1210600	-3.30363	2.61081	Sz	45.0358	4.15087
PcyM_1242300	-3.30494	3.1031	Sz	800.144	74.9374
PcyM_1334800	-3.30677	1.73375	Sz	3.46576	0.294068
PcyM_1345900	-3.30758	1.87814	Sz	119.124	10.3151
PcyM_0838400	-3.30937	2.15871	Sz	3.97781	0.35461
PcyM_0838900	-3.30964	1.88923	Sz	5.45157	0.476795
PcyM_0911600	-3.31031	1.31565	Sz	49.7572	3.81334
PcyM_1231500	-3.31127	1.58064	Sz	12.8869	1.05138
PcyM_0722100	-3.31424	1.00548	Sz	32.5711	2.04112
PcyM_0109700	-3.31712	1.55109	Sz	34.4886	2.82111
PcyM_0725900	-3.31918	0.847868	Sz	6.61139	0.337387
PcyM_1028600	-3.32128	1.85628	Sz	1.82438	0.159091
PcyM_1427900	-3.32177	2.22245	Sz	90.9606	8.06235
PcyM_1000400	-3.32237	2.22483	Sz	13.7574	1.21885
PcyM_0712600	-3.3237	1.66419	Sz	6.9766	0.572485
PcyM_0531500	-3.32447	3.55458	Sz	206.825	19.3244
PcyM_1316600	-3.32467	3.18747	Sz	251.416	23.2719
PcyM_1245700	-3.32655	1.81137	Sz	6.41368	0.541978
PcyM_1462600	-3.32775	2.28701	Sz	33.0602	2.91203
PcyM_1461400	-3.32836	1.47752	Sz	5.74262	0.472516
PcyM_1266500	-3.32888	2.05369	Sz	140.179	12.2461
PcyM_0837800	-3.32967	2.65985	Sz	72.2476	6.52227
PcyM_1434600	-3.33111	3.30434	Sz	372.545	34.4255
PcyM_0309300	-3.33155	2.8837	Sz	100.43	9.17525
PcyM_0808200	-3.33263	1.34921	Sz	108.094	8.36078
PcyM_0210800	-3.33322	2.74631	Sz	156.562	14.2764
PcyM_1462800	-3.33337	2.07606	Sz	44.3597	3.84272
PcyM_1474200	-3.33354	2.13986	Sz	46.3477	4.04065
PcyM_0830800	-3.33407	1.19663	Sz	8.13458	0.595383
PcyM_1331200	-3.33423	2.2507	Sz	60.6693	5.33212
PcyM_1131400	-3.33447	2.6686	Sz	26.6145	2.39816
PcyM_1435500	-3.33866	0.913718	Sz	3.78969	0.240742
PcyM_1466200	-3.3392	1.72174	Sz	226.959	18.8216
PcyM_0422000	-3.34261	3.35775	Sz	19.0892	1.7515
PcyM_1027900	-3.34352	3.15517	Sz	218.963	19.978
PcyM_0510900	-3.34448	2.95933	Sz	255.836	23.1458
PcyM_1468800	-3.34523	1.40775	Sz	18.8335	1.44937
PcyM_0418200	-3.3453	1.82285	Sz	50.5764	4.19395
PcyM_0910500	-3.34846	1.69004	Sz	10.1198	0.837631
PcyM_0313500	-3.35193	1.22318	Sz	12.2668	0.839472
PcyM_0609200	-3.35202	3.35699	Sz	197.44	17.9891
PcyM_1130700	-3.35391	1.46945	Sz	10.2929	0.78484
PcyM_0708400	-3.35401	2.17669	Sz	13.1028	1.12199
PcyM_0312300	-3.35765	2.86952	Sz	83.9211	7.51676
PcyM_1236800	-3.35831	3.33061	Sz	574.272	52.0133
PcyM_1241400	-3.36082	2.13988	Sz	113.256	9.63654
PcyM_0928200	-3.36091	1.14804	Sz	9.84957	0.687448
PcyM_0416600	-3.36381	2.50391	Sz	23.8172	2.07944
PcyM_0104500	-3.36471	2.97772	Sz	23.1247	2.05877
PcyM_0206400	-3.3648	3.32135	Sz	73.1053	6.58306
PcyM_0525400	-3.36585	1.09285	Sz	5.22461	0.33596
PcyM_1028300	-3.36686	2.09745	Sz	17.7292	1.50392
PcyM_MT00700	-3.36708	1.83802	Sz	71.9712	5.93516
PcyM_1429600	-3.36745	3.17343	Sz	425.763	38.1214
PcyM_0912500	-3.36761	2.98855	Sz	481.808	42.8482
PcyM_1321300	-3.36908	0.868825	Sz	1.25924	0.0553396
PcyM_1269100	-3.36985	2.13141	Sz	61.6995	5.2229
PcyM_1309400	-3.37095	1.60594	Sz	30.1687	2.37622
PcyM_1447200	-3.37182	3.38236	Sz	225.822	20.2692
PcyM_1024600	-3.37211	2.10019	Sz	1.88012	0.156583
PcyM_1468000	-3.37235	2.17438	Sz	74.687	6.30521
PcyM_0821400	-3.37264	1.52054	Sz	24.275	1.8749
PcyM_1344200	-3.37338	2.32321	Sz	34.4574	2.93948
PcyM_0312000	-3.37486	1.76931	Sz	71.926	5.70911
PcyM_1438900	-3.37624	1.02386	Sz	0.51823	0.0324775
PcyM_0523000	-3.37682	1.23904	Sz	1.70019	0.113419
PcyM_0703700	-3.37837	2.50648	Sz	11.3563	0.9754
PcyM_0530300	-3.3786	1.57563	Sz	12.7969	0.996612
PcyM_0929600	-3.37994	1.07125	Sz	9.92133	0.643134
PcyM_0946800	-3.38008	3.32046	Sz	23.1359	2.05939
PcyM_1001800	-3.38027	1.32113	Sz	0.655333	0.04825
PcyM_1143000	-3.38095	2.03774	Sz	55.5254	4.60035
PcyM_1107200	-3.38206	1.31435	Sz	2.73222	0.197294
PcyM_0213900	-3.38225	2.91218	Sz	241.006	21.1459
PcyM_1338300	-3.38277	1.60291	Sz	34.4194	2.68035
PcyM_0828300	-3.38541	3.28062	Sz	313.272	27.7472
PcyM_0207100	-3.3855	1.28474	Sz	55.7702	4.0239
PcyM_1403900	-3.38735	2.32355	Sz	18.7083	1.58528
PcyM_0304900	-3.38749	2.63605	Sz	34.4265	2.98411
PcyM_1456000	-3.38848	3.05743	Sz	120.47	10.5222
PcyM_0110700	-3.38891	2.06121	Sz	73.571	6.07066
PcyM_1210400	-3.3895	2.18115	Sz	97.6652	8.16313
PcyM_1032800	-3.38994	2.61599	Sz	697.356	59.9781
PcyM_1144100	-3.39006	1.6173	Sz	26.8412	2.08999
PcyM_1206100	-3.39106	1.02353	Sz	0.693902	0.041781
PcyM_1236900	-3.39175	2.97583	Sz	49.4017	4.30522
PcyM_1257100	-3.39346	1.20426	Sz	0.536297	0.0400661
PcyM_0806100	-3.39567	2.85278	Sz	78.6786	6.81656
PcyM_1116200	-3.39608	1.6559	Sz	3.20484	0.249159
PcyM_1325600	-3.39673	1.73822	Sz	3.27203	0.26082
PcyM_1275200	-3.39764	3.18585	Sz	30.4043	2.66262
PcyM_0531200	-3.3979	1.07073	Sz	0.462193	0.0299559
PcyM_1228200	-3.39846	2.63806	Sz	307.942	26.4101
PcyM_0713100	-3.39952	1.9245	Sz	1.22849	0.0992935
PcyM_0908300	-3.40011	3.02509	Sz	56.1901	4.88223
PcyM_1433900	-3.40021	1.54377	Sz	12.5485	0.939711
PcyM_1423300	-3.40181	1.82836	Sz	7.33206	0.583481
PcyM_1018300	-3.40236	2.28015	Sz	203.575	16.992
PcyM_1131900	-3.40434	2.94661	Sz	112.717	9.73943
PcyM_0823000	-3.40463	1.40933	Sz	5.75065	0.422294
PcyM_0941600	-3.40615	1.80178	Sz	14.5479	1.15029
PcyM_0405900	-3.40673	2.49413	Sz	97.6689	8.21719
PcyM_0728800	-3.40881	3.71498	Sz	141.683	12.4766
PcyM_0418900	-3.40916	2.39969	Sz	40.5793	3.38112
PcyM_1117100	-3.40949	1.96584	Sz	656.227	52.7674
PcyM_0921300	-3.41011	1.10971	Sz	0.490183	0.0340691
PcyM_1141700	-3.41111	2.78598	Sz	24.1265	2.05787
PcyM_0626500	-3.41221	2.78384	Sz	12.819	1.08426
PcyM_1255400	-3.41257	2.19213	Sz	92.2073	7.56935
PcyM_0804300	-3.41586	2.89935	Sz	643.933	54.9675
PcyM_1454200	-3.41681	2.00942	Sz	14.9111	1.20181
PcyM_0214000	-3.41693	1.29341	Sz	6.72223	0.465555
PcyM_0617100	-3.41799	1.25606	Sz	1.12075	0.078417
PcyM_0619700	-3.4182	1.65478	Sz	5.50463	0.416749
PcyM_0616600	-3.41992	1.8472	Sz	370.022	29.0699
PcyM_1436600	-3.42163	2.92097	Sz	232.434	19.7616
PcyM_0917000	-3.42444	2.57094	Sz	118.462	9.87851
PcyM_1238800	-3.42522	2.61695	Sz	1042.97	87.1714
PcyM_1439400	-3.42564	1.61551	Sz	17.0202	1.28226
PcyM_0816700	-3.42798	2.22792	Sz	20.3299	1.64714
PcyM_0311800	-3.42969	1.77384	Sz	39.7559	3.07406
PcyM_0420100	-3.42995	1.69035	Sz	34.9273	2.62757
PcyM_1321800	-3.42997	2.00873	Sz	92.4889	7.35146
PcyM_0922900	-3.43013	1.47064	Sz	103.212	7.55674
PcyM_0810200	-3.43272	2.80058	Sz	201.975	16.9375
PcyM_1256500	-3.43323	1.33256	Sz	15.9691	1.05396
PcyM_1014000	-3.43323	2.03864	Sz	20.7279	1.65065
PcyM_0918600	-3.43376	1.6131	Sz	4.44141	0.328985
PcyM_0115000	-3.43396	1.42302	Sz	39.1054	2.77443
PcyM_0421600	-3.43505	0.922425	Sz	2.52004	0.125028
PcyM_0105100	-3.43827	2.31931	Sz	5.52361	0.446485
PcyM_1004300	-3.43893	1.62239	Sz	4.50554	0.336609
PcyM_1226200	-3.43894	1.14199	Sz	2.41951	0.151415
PcyM_1451300	-3.43896	2.57708	Sz	3.27958	0.266755
PcyM_0511800	-3.43931	1.95764	Sz	17.2449	1.358
PcyM_0915000	-3.4394	2.00613	Sz	71.4585	5.62363
PcyM_0905400	-3.43947	1.6094	Sz	90.6469	6.73355
PcyM_1219900	-3.43978	2.44831	Sz	32.4755	2.65318
PcyM_1020900	-3.44014	1.90402	Sz	38.1195	2.97096
PcyM_1138400	-3.44023	1.11628	Sz	5.37447	0.359057
PcyM_1216900	-3.44114	1.04194	Sz	20.807	1.27859
PcyM_0724700	-3.44393	1.50676	Sz	43.0272	3.09698
PcyM_1306100	-3.44474	3.49152	Sz	163.065	13.8916
PcyM_0503200	-3.44477	3.23818	Sz	3323.37	280.892
PcyM_1307400	-3.44796	1.62217	Sz	112.391	8.32224
PcyM_1448200	-3.44815	3.02117	Sz	90.6045	7.56589
PcyM_0700200	-3.44852	1.53846	Sz	18.199	1.31717
PcyM_0914800	-3.44857	1.80337	Sz	82.7097	6.30595
PcyM_1341800	-3.44911	2.78384	Sz	22.7638	1.88996
PcyM_1215600	-3.44945	3.14585	Sz	537.951	45.1685
PcyM_1344900	-3.45014	2.48003	Sz	21.7777	1.76397
PcyM_0520100	-3.4517	1.5282	Sz	7.82278	0.554401
PcyM_1135700	-3.45189	1.72174	Sz	26.1343	1.97735
PcyM_1271800	-3.45238	1.6987	Sz	71.9755	5.40544
PcyM_1413600	-3.45609	1.69427	Sz	74.5523	5.5336
PcyM_0213600	-3.45628	2.79094	Sz	14.5182	1.1944
PcyM_0817100	-3.45659	2.17669	Sz	66.6893	5.26855
PcyM_1421200	-3.45718	3.06663	Sz	32.0055	2.66928
PcyM_1204200	-3.4575	1.64299	Sz	5.83598	0.434821
PcyM_0826400	-3.45825	2.05505	Sz	116.899	9.17108
PcyM_0210200	-3.45852	2.45277	Sz	596.238	48.0616
PcyM_0421400	-3.45914	1.73393	Sz	3.45032	0.256572
PcyM_0516500	-3.45951	2.71024	Sz	41.7941	3.43733
PcyM_0514900	-3.4605	1.30379	Sz	18.0922	1.24396
PcyM_1345300	-3.46057	3.55483	Sz	102.629	8.65749
PcyM_1106500	-3.46193	3.13468	Sz	248.914	20.7047
PcyM_0804800	-3.46296	1.48083	Sz	32.5611	2.31919
PcyM_1237800	-3.4631	1.9443	Sz	9.77564	0.743715
PcyM_0308100	-3.46484	1.69211	Sz	30.848	2.25869
PcyM_1134100	-3.46631	1.25462	Sz	5.08347	0.334179
PcyM_0703900	-3.46654	1.57579	Sz	8.35853	0.597206
PcyM_1149400	-3.46684	2.76602	Sz	26.474	2.16641
PcyM_0838700	-3.46747	2.89513	Sz	29.2111	2.39522
PcyM_1332100	-3.4679	2.3702	Sz	28.2839	2.24043
PcyM_1475600	-3.4689	2.97221	Sz	48.1346	3.95863
PcyM_0704000	-3.46926	2.74103	Sz	120.806	9.81637
PcyM_0710600	-3.46996	2.89935	Sz	107.64	8.80113
PcyM_1225100	-3.47169	1.53954	Sz	293.888	20.8511
PcyM_1018900	-3.47259	1.63884	Sz	22.6774	1.6384
PcyM_1417800	-3.47422	4.09232	Sz	527.281	44.5328
PcyM_1253200	-3.47743	2.09091	Sz	74.3526	5.73612
PcyM_1236200	-3.4775	2.90222	Sz	66.4428	5.38217
PcyM_0530400	-3.48054	0.973187	Sz	1.75767	0.100375
PcyM_1252400	-3.48152	2.82283	Sz	90.9065	7.36839
PcyM_1408600	-3.48216	2.89427	Sz	33.6489	2.72984
PcyM_1020100	-3.48575	2.20814	Sz	68.0428	5.26342
PcyM_0615300	-3.4858	1.88109	Sz	46.6627	3.47698
PcyM_1447100	-3.48595	2.2908	Sz	37.9715	2.96014
PcyM_0118000	-3.48715	2.23586	Sz	258.246	19.9815
PcyM_0919700	-3.4882	2.16996	Sz	11.191	0.862747
PcyM_0506800	-3.48873	3.33113	Sz	619.764	50.8145
PcyM_1241800	-3.48876	2.39199	Sz	103.652	8.11664
PcyM_0943700	-3.48903	1.99984	Sz	14.3003	1.0784
PcyM_0119600	-3.48973	3.20058	Sz	121.331	9.91368
PcyM_1469300	-3.4918	2.35775	Sz	181.256	14.0945
PcyM_1104100	-3.49184	2.14771	Sz	68.6344	5.25601
PcyM_0708500	-3.49217	3.77442	Sz	159.975	13.243
PcyM_0310500	-3.49272	2.46816	Sz	19.376	1.52219
PcyM_0627700	-3.49329	1.60262	Sz	17.9248	1.2666
PcyM_1206400	-3.49362	2.53113	Sz	31.5072	2.46183
PcyM_0950900	-3.49375	2.00599	Sz	39.1619	2.94662
PcyM_0840300	-3.49463	0.896166	Sz	2.60387	0.0989026
PcyM_1350400	-3.49485	2.80919	Sz	131.953	10.5589
PcyM_1126600	-3.49492	1.74281	Sz	3.5818	0.257348
PcyM_1103000	-3.49543	2.58573	Sz	6.85704	0.543061
PcyM_0828200	-3.49607	1.52809	Sz	9.68895	0.693518
PcyM_1128300	-3.49696	1.37258	Sz	1.26247	0.0894313
PcyM_0422400	-3.49774	1.77411	Sz	29.6463	2.1609
PcyM_0712800	-3.50021	1.30915	Sz	9.06192	0.612426
PcyM_0417900	-3.50105	1.45204	Sz	8.30305	0.533304
PcyM_1456400	-3.50191	1.29906	Sz	35.5951	2.29087
PcyM_0614400	-3.50207	2.61903	Sz	26.5901	2.099
PcyM_0324900	-3.50299	2.06811	Sz	114.785	8.65734
PcyM_1335400	-3.50336	2.0491	Sz	21.4134	1.58497
PcyM_1125900	-3.50355	1.25405	Sz	10.638	0.697196
PcyM_1452100	-3.50443	2.54657	Sz	2.70626	0.207292
PcyM_0323200	-3.50494	1.82836	Sz	76.2397	5.58114
PcyM_0726800	-3.5056	3.54456	Sz	1040.99	84.7987
PcyM_1256300	-3.50725	1.8806	Sz	11.6558	0.85208
PcyM_0935900	-3.50787	2.95906	Sz	56.5911	4.52366
PcyM_1460900	-3.50879	2.83085	Sz	237.934	18.835
PcyM_1311000	-3.50882	1.37133	Sz	1.17337	0.0713296
PcyM_1257400	-3.50917	2.10236	Sz	39.954	3.03989
PcyM_0921000	-3.51022	1.6497	Sz	85.6346	5.99031
PcyM_0945500	-3.51245	2.14114	Sz	12.2638	0.929924
PcyM_1331000	-3.51284	1.45708	Sz	19.588	1.27133
PcyM_1143800	-3.51632	1.25207	Sz	22.4172	1.37841
PcyM_0707400	-3.51653	1.9678	Sz	93.9904	6.91771
PcyM_0910600	-3.5169	1.53349	Sz	1.49504	0.101619
PcyM_0909600	-3.51729	2.04436	Sz	44.9031	3.32366
PcyM_0727700	-3.5183	1.35372	Sz	6.58272	0.440182
PcyM_1312000	-3.51873	2.79861	Sz	216.979	16.9989
PcyM_1342900	-3.51896	1.05715	Sz	13.6187	0.780488
PcyM_1008200	-3.52137	2.89784	Sz	42.9999	3.36607
PcyM_0215600	-3.52151	2.8154	Sz	244.325	19.1195
PcyM_1332900	-3.52285	2.36994	Sz	72.6112	5.52964
PcyM_1023900	-3.52333	1.23703	Sz	3.13493	0.190392
PcyM_1354300	-3.52373	1.04495	Sz	0.650786	0.0380692
PcyM_0823300	-3.52506	1.48851	Sz	3.19795	0.21037
PcyM_0725500	-3.5254	1.89227	Sz	0.912806	0.065316
PcyM_1105100	-3.5254	1.69433	Sz	10.8439	0.774244
PcyM_1124900	-3.52584	3.19694	Sz	172.273	13.6484
PcyM_1238000	-3.52709	2.51795	Sz	99.4682	7.61891
PcyM_0817800	-3.5277	2.74603	Sz	91.577	7.10748
PcyM_0932600	-3.52779	2.19422	Sz	234.108	17.4671
PcyM_0718600	-3.52864	1.2296	Sz	22.3517	1.43634
PcyM_1405300	-3.52867	3.01536	Sz	9.16313	0.720681
PcyM_1236100	-3.53089	1.47947	Sz	32.5255	2.14156
PcyM_0623400	-3.53103	2.06789	Sz	79.9375	5.87379
PcyM_1256800	-3.53186	3.66908	Sz	102.516	8.21532
PcyM_0939500	-3.53315	2.65738	Sz	24.9783	1.91857
PcyM_0945600	-3.53317	1.51936	Sz	4.78765	0.314693
PcyM_1412400	-3.53339	1.94347	Sz	29.4759	2.12854
PcyM_0709900	-3.5342	2.06425	Sz	78.1626	5.70925
PcyM_1129400	-3.53487	2.86147	Sz	29.9255	2.32056
PcyM_0611800	-3.5355	2.02837	Sz	5.10735	0.365393
PcyM_1449600	-3.53565	1.8611	Sz	40.5029	2.87387
PcyM_1224700	-3.54232	2.74943	Sz	9.19896	0.703779
PcyM_1203200	-3.54336	2.05748	Sz	11.073	0.802471
PcyM_1306700	-3.54417	2.72023	Sz	3.86906	0.29268
PcyM_1250900	-3.54478	2.43855	Sz	16.1239	1.21534
PcyM_0946900	-3.54495	2.27082	Sz	137.844	10.2408
PcyM_1140000	-3.54504	1.90804	Sz	7.58126	0.539542
PcyM_0114900	-3.54523	2.42923	Sz	43.4831	3.24827
PcyM_1302800	-3.5471	2.04241	Sz	31.7759	2.28442
PcyM_0218900	-3.54751	3.08166	Sz	192.805	14.9699
PcyM_1246300	-3.54934	1.09673	Sz	3.68701	0.208517
PcyM_0322100	-3.54972	2.60632	Sz	25.7159	1.97183
PcyM_1220500	-3.55142	2.0493	Sz	19.4918	1.40539
PcyM_1213500	-3.5519	2.16379	Sz	110.966	8.1157
PcyM_1118200	-3.5534	2.39065	Sz	44.3673	3.31626
PcyM_0926300	-3.55915	2.36818	Sz	103.146	7.6317
PcyM_0936700	-3.55925	2.09965	Sz	140.034	10.1053
PcyM_0945200	-3.55961	2.21465	Sz	114.35	8.32464
PcyM_1139500	-3.56253	2.88401	Sz	45.7817	3.46818
PcyM_1240900	-3.56262	2.49487	Sz	82.128	6.09441
PcyM_0508400	-3.56397	2.36664	Sz	14.5467	1.07246
PcyM_0915800	-3.56629	2.517	Sz	26.2093	1.93969
PcyM_0211400	-3.56705	1.87183	Sz	51.0863	3.578
PcyM_1005300	-3.56759	3.41908	Sz	337.762	26.1535
PcyM_0514200	-3.56802	2.81973	Sz	234.102	17.7311
PcyM_0416100	-3.57044	1.13917	Sz	7.93236	0.422142
PcyM_0836800	-3.57143	2.93788	Sz	33.1335	2.49024
PcyM_0934100	-3.57252	2.05532	Sz	52.9282	3.73304
PcyM_1409300	-3.57312	3.39761	Sz	154.03	11.8681
PcyM_0929200	-3.57399	3.25853	Sz	26.6736	2.05311
PcyM_1105800	-3.57656	2.09464	Sz	7.88039	0.558619
PcyM_1418200	-3.57806	2.56826	Sz	107.765	7.94636
PcyM_1406800	-3.57813	3.89791	Sz	74.9719	5.83385
PcyM_0306000	-3.57868	1.09056	Sz	7.53444	0.427031
PcyM_0950800	-3.57913	2.3282	Sz	18.2082	1.31344
PcyM_1301100	-3.57956	3.19222	Sz	182.585	13.9079
PcyM_0417700	-3.57988	3.06169	Sz	17.7018	1.34039
PcyM_0939700	-3.57993	4.16705	Sz	143.397	11.2085
PcyM_0710900	-3.58232	3.06776	Sz	700.099	52.8913
PcyM_0616500	-3.58232	2.55944	Sz	192.082	14.1117
PcyM_1322600	-3.58323	2.87679	Sz	5.78328	0.430941
PcyM_0912000	-3.58349	2.43597	Sz	39.7112	2.9373
PcyM_0928400	-3.58543	2.57027	Sz	182.469	13.3735
PcyM_0707100	-3.58586	3.35354	Sz	153.086	11.6341
PcyM_0516700	-3.58588	1.27066	Sz	2.5913	0.148614
PcyM_1444000	-3.58702	2.02583	Sz	66.6021	4.63131
PcyM_1273400	-3.58825	2.09226	Sz	8.08043	0.562324
PcyM_0815100	-3.58855	3.52868	Sz	207.908	15.8832
PcyM_1408200	-3.58911	2.2908	Sz	40.9637	2.93104
PcyM_1133900	-3.58941	2.12447	Sz	7.40858	0.519027
PcyM_0835000	-3.59167	2.31367	Sz	248.095	17.7527
PcyM_0701300	-3.59177	2.09945	Sz	3.42511	0.238826
PcyM_0516600	-3.59238	3.20011	Sz	797.69	60.1174
PcyM_0120900	-3.59293	2.79916	Sz	31.4869	2.3297
PcyM_1306400	-3.59305	2.05505	Sz	172.898	11.9869
PcyM_1409700	-3.5931	1.32264	Sz	10.6687	0.647815
PcyM_0405600	-3.5931	1.88515	Sz	51.5728	3.50167
PcyM_0732500	-3.59354	2.24572	Sz	120.429	8.54483
PcyM_0802600	-3.59427	1.77273	Sz	41.1204	2.72428
PcyM_0803200	-3.59474	2.73655	Sz	72.719	5.3535
PcyM_0727400	-3.59516	1.50197	Sz	4.03568	0.248264
PcyM_0718000	-3.5952	2.69154	Sz	50.8144	3.76084
PcyM_1305300	-3.59628	2.35952	Sz	39.912	2.852
PcyM_0622300	-3.5983	2.6994	Sz	87.4206	6.39498
PcyM_0835900	-3.59905	3.54652	Sz	48.2887	3.65443
PcyM_1475700	-3.5991	3.52868	Sz	521.772	39.5503
PcyM_1009800	-3.6005	1.35562	Sz	23.6261	1.39783
PcyM_1334300	-3.60149	3.55787	Sz	28.6811	2.17586
PcyM_1430100	-3.60181	3.30434	Sz	32.1685	2.41681
PcyM_0306900	-3.60243	0.979241	Sz	3.18766	0.148769
PcyM_0614900	-3.60306	2.38247	Sz	238.098	17.066
PcyM_0510800	-3.60429	1.73298	Sz	1.7322	0.115771
PcyM_1338500	-3.60471	2.14771	Sz	32.1619	2.28159
PcyM_0817400	-3.60478	2.32374	Sz	19.892	1.40719
PcyM_0808700	-3.60703	1.49544	Sz	3.6442	0.228561
PcyM_1008400	-3.60791	1.6083	Sz	0.916124	0.0585524
PcyM_0812000	-3.60836	1.90228	Sz	4.57576	0.299545
PcyM_0926700	-3.61131	1.73769	Sz	0.249096	0.0164787
PcyM_0119100	-3.61152	1.49282	Sz	91.5044	5.56601
PcyM_1237700	-3.61189	2.13513	Sz	147.303	10.1588
PcyM_0811700	-3.61204	3.79912	Sz	462.34	34.9856
PcyM_0924100	-3.61507	3.31191	Sz	35.0205	2.60532
PcyM_1255900	-3.61624	2.0879	Sz	138.672	9.4997
PcyM_1325800	-3.61659	2.42823	Sz	3.62965	0.257835
PcyM_1267500	-3.61673	2.18065	Sz	35.8501	2.45331
PcyM_1006400	-3.61829	1.54381	Sz	6.31602	0.393782
PcyM_0802800	-3.61943	2.07445	Sz	28.8205	1.966
PcyM_0611100	-3.6198	3.13755	Sz	40.9906	3.00654
PcyM_1270300	-3.62156	3.28398	Sz	115.729	8.56457
PcyM_0930600	-3.62201	1.42853	Sz	8.34973	0.515861
PcyM_API00400	-3.62255	1.17195	Sz	21.6203	0.914458
PcyM_1255800	-3.62332	3.09652	Sz	213.385	15.6344
PcyM_1145000	-3.62339	4.28974	Sz	405.98	30.7843
PcyM_0939900	-3.62473	2.79471	Sz	1.9714	0.139916
PcyM_0620400	-3.62614	2.29329	Sz	9.22117	0.635555
PcyM_1228800	-3.62675	3.47398	Sz	37.4903	2.77489
PcyM_1449300	-3.6268	2.62787	Sz	56.3672	4.03691
PcyM_0305700	-3.62703	2.51931	Sz	94.583	6.67929
PcyM_1213200	-3.62738	2.35595	Sz	22.3518	1.55775
PcyM_0829000	-3.62914	3.72055	Sz	191.411	14.2516
PcyM_0504900	-3.62967	3.13851	Sz	115.554	8.43614
PcyM_0311700	-3.62978	2.84026	Sz	205.067	14.7618
PcyM_0952600	-3.63002	2.08818	Sz	104.854	7.06692
PcyM_1114100	-3.63006	3.62672	Sz	259.052	19.2556
PcyM_1117700	-3.63093	2.37578	Sz	21.0831	1.47968
PcyM_0704800	-3.63302	2.72563	Sz	83.9327	6.05059
PcyM_0406100	-3.63324	1.73323	Sz	46.4871	2.97366
PcyM_1342400	-3.63527	2.31035	Sz	103.131	7.11338
PcyM_1254600	-3.63598	2.28784	Sz	7.80855	0.547394
PcyM_0737200	-3.63616	2.84595	Sz	74.3643	5.33771
PcyM_1254000	-3.63703	2.76095	Sz	28.6257	2.03753
PcyM_0313000	-3.63761	2.31918	Sz	9.54707	0.662939
PcyM_1115600	-3.63771	2.12447	Sz	76.1182	5.13594
PcyM_1445900	-3.63864	1.75682	Sz	1.29194	0.0829942
PcyM_0738200	-3.64041	1.51585	Sz	3.80328	0.234952
PcyM_0309400	-3.64354	3.55383	Sz	248.474	18.218
PcyM_1245100	-3.644	3.06219	Sz	13.8693	0.996165
PcyM_0732700	-3.64423	2.48486	Sz	86.392	5.99014
PcyM_1231300	-3.64631	1.53747	Sz	38.9109	2.32423
PcyM_1246700	-3.6467	1.97246	Sz	8.10935	0.540366
PcyM_0808100	-3.64904	3.14477	Sz	133.666	9.54563
PcyM_1411700	-3.64938	2.01512	Sz	9.78732	0.66018
PcyM_0939300	-3.6497	2.0515	Sz	19.6823	1.30929
PcyM_1436200	-3.65064	2.18434	Sz	44.1431	2.97732
PcyM_1247900	-3.65127	1.67678	Sz	4.58715	0.289411
PcyM_0120000	-3.65301	2.62994	Sz	8.18464	0.57229
PcyM_0216600	-3.65561	2.90275	Sz	106.159	7.51671
PcyM_1420300	-3.65577	1.28641	Sz	1.45031	0.0798262
PcyM_1004400	-3.65589	1.73096	Sz	20.5058	1.32383
PcyM_1305700	-3.65645	3.20109	Sz	4.11091	0.294062
PcyM_1272400	-3.6567	2.50387	Sz	8.22365	0.56639
PcyM_0105600	-3.657	3.02865	Sz	17.1974	1.2225
PcyM_0416400	-3.65719	1.51627	Sz	4.09437	0.231877
PcyM_0946400	-3.65738	2.59759	Sz	184.854	12.8252
PcyM_1445600	-3.65898	1.58079	Sz	26.2838	1.50311
PcyM_0216300	-3.65991	1.76609	Sz	9.09483	0.585682
PcyM_0942600	-3.66018	1.75694	Sz	136.559	8.53566
PcyM_1004000	-3.66183	3.2963	Sz	17.0824	1.22248
PcyM_1443500	-3.66274	3.23943	Sz	37.1381	2.64817
PcyM_1020400	-3.66312	2.05125	Sz	97.6008	6.39591
PcyM_0513500	-3.66483	1.81279	Sz	1.5749	0.103334
PcyM_0412500	-3.665	3.25869	Sz	63.5779	4.55033
PcyM_1469400	-3.66526	3.19104	Sz	59.3935	4.20375
PcyM_1466300	-3.66537	3.90433	Sz	406.043	29.5616
PcyM_0810900	-3.66664	3.90311	Sz	315.838	22.9946
PcyM_0828400	-3.66699	3.60572	Sz	277.05	19.9767
PcyM_0933100	-3.66871	3.56471	Sz	450.05	32.362
PcyM_1103100	-3.67089	1.80077	Sz	59.9001	3.70842
PcyM_0717500	-3.67097	2.40994	Sz	14.9368	1.00643
PcyM_1280500	-3.6717	1.72174	Sz	31.2714	1.85071
PcyM_1474900	-3.67281	2.49764	Sz	10.47	0.711605
PcyM_0918000	-3.6733	3.20172	Sz	56.5979	3.99375
PcyM_0907300	-3.67398	3.37524	Sz	286.581	20.393
PcyM_1239800	-3.6744	4.43936	Sz	284.7	20.8463
PcyM_1239900	-3.67514	4.14113	Sz	441.97	32.1518
PcyM_0215300	-3.67557	3.57408	Sz	259.328	18.5636
PcyM_1128600	-3.67635	3.55353	Sz	96.9774	6.93487
PcyM_0928700	-3.67637	2.54663	Sz	90.4631	6.18149
PcyM_1464100	-3.67802	3.28668	Sz	169.598	11.9864
PcyM_1253800	-3.68203	2.36782	Sz	4.07498	0.276134
PcyM_0519600	-3.68248	1.64876	Sz	0.935926	0.0556919
PcyM_0937500	-3.6826	2.11569	Sz	17.5089	1.11833
PcyM_1475000	-3.68447	2.00873	Sz	17.0495	1.07477
PcyM_0623200	-3.68628	3.59339	Sz	79.6566	5.64592
PcyM_0602400	-3.68689	1.48485	Sz	2.19218	0.118199
PcyM_0316100	-3.68726	3.64816	Sz	370.032	26.3131
PcyM_0212600	-3.68742	3.22139	Sz	330.684	23.1838
PcyM_0807900	-3.68806	2.08454	Sz	35.8872	2.2877
PcyM_1019300	-3.69133	1.53759	Sz	98.9777	5.69864
PcyM_1431900	-3.6914	1.65952	Sz	23.9657	1.42712
PcyM_0614600	-3.69233	2.87028	Sz	39.836	2.72711
PcyM_1241600	-3.69291	3.14518	Sz	183.041	12.6822
PcyM_0726900	-3.69374	2.58837	Sz	286.69	19.2743
PcyM_1001600	-3.69376	3.80534	Sz	96.2385	6.88162
PcyM_0812200	-3.69433	3.17609	Sz	93.1847	6.50414
PcyM_0108400	-3.69433	2.66409	Sz	42.3668	2.86682
PcyM_1414000	-3.69554	3.56733	Sz	290.084	20.418
PcyM_1324900	-3.69606	1.70066	Sz	2.5187	0.154076
PcyM_1216300	-3.69747	1.29757	Sz	0.614918	0.0339984
PcyM_1412800	-3.69756	2.5427	Sz	10.2521	0.68075
PcyM_0527100	-3.69996	2.30099	Sz	17.8967	1.167
PcyM_0710300	-3.70051	2.2571	Sz	37.9828	2.46662
PcyM_0836700	-3.70061	1.82081	Sz	194.7	11.8888
PcyM_0830400	-3.7009	2.41103	Sz	150.206	9.92511
PcyM_0415300	-3.70219	4.12597	Sz	284.158	20.2308
PcyM_0926600	-3.70528	4.33407	Sz	60.129	4.28798
PcyM_1352000	-3.70697	1.71246	Sz	17.376	1.0248
PcyM_1002400	-3.70726	1.06829	Sz	17.6696	0.819889
PcyM_0831600	-3.70741	3.97173	Sz	904.012	63.8702
PcyM_1332400	-3.70999	1.1179	Sz	3.86571	0.13959
PcyM_0803800	-3.71009	2.03392	Sz	11.0577	0.693941
PcyM_0710100	-3.7123	2.47638	Sz	67.8429	4.43922
PcyM_1420100	-3.71274	4.23369	Sz	54.8987	3.89144
PcyM_1010100	-3.71275	2.31846	Sz	130.189	8.43391
PcyM_MT02700	-3.71375	1.04935	Sz	17.7916	0.968493
PcyM_1350000	-3.71497	2.97473	Sz	37.4436	2.54127
PcyM_0510600	-3.7178	2.01615	Sz	57.9941	3.56281
PcyM_1323900	-3.71791	2.46003	Sz	64.9713	4.23169
PcyM_0802700	-3.71866	2.15289	Sz	32.4319	2.10073
PcyM_0715100	-3.72007	2.34471	Sz	89.9827	5.8636
PcyM_1204900	-3.72082	3.71469	Sz	216.231	15.0119
PcyM_0947600	-3.72094	3.31936	Sz	107.192	7.33854
PcyM_1431100	-3.72116	2.33966	Sz	1.21624	0.0817516
PcyM_0935600	-3.72255	2.89271	Sz	101.524	6.81569
PcyM_0528300	-3.72274	4.23329	Sz	386.583	27.1669
PcyM_1310500	-3.72279	3.51643	Sz	85.0105	5.85515
PcyM_1414700	-3.72319	1.16201	Sz	7.05462	0.388217
PcyM_1461100	-3.72363	3.6041	Sz	28.8187	1.99616
PcyM_0602800	-3.7247	1.77033	Sz	70.5043	4.21448
PcyM_1317300	-3.72632	4.10201	Sz	94.9451	6.63699
PcyM_1305400	-3.72687	2.37278	Sz	141.645	9.06813
PcyM_0503800	-3.72734	2.55982	Sz	25.2287	1.66472
PcyM_1469900	-3.72928	2.33232	Sz	20.853	1.32672
PcyM_0215700	-3.73093	2.15689	Sz	28.3113	1.77781
PcyM_1405200	-3.73137	1.69691	Sz	5.36142	0.316021
PcyM_1434800	-3.73187	1.57684	Sz	2.46572	0.148588
PcyM_0919300	-3.73281	2.00084	Sz	5.75618	0.347812
PcyM_0915400	-3.73281	2.1252	Sz	144.51	8.99205
PcyM_0503700	-3.73443	1.91593	Sz	28.1905	1.70604
PcyM_0112200	-3.73449	1.50805	Sz	4.39452	0.224696
PcyM_1009000	-3.73525	2.72271	Sz	192.138	12.6201
PcyM_1473500	-3.7377	2.4791	Sz	239.219	15.4452
PcyM_0523200	-3.73827	3.09831	Sz	147.395	9.86203
PcyM_0624100	-3.74005	2.80332	Sz	32.8344	2.16215
PcyM_0212200	-3.74097	2.2582	Sz	51.0547	3.26463
PcyM_0522400	-3.74134	1.31957	Sz	20.0047	0.909275
PcyM_0951700	-3.74239	2.29081	Sz	84.7536	5.29915
PcyM_1312800	-3.74348	1.96573	Sz	2.11075	0.1267
PcyM_1354200	-3.74352	1.32264	Sz	2.71656	0.133305
PcyM_1210200	-3.74405	1.70989	Sz	36.5017	2.05867
PcyM_0921400	-3.74441	2.73833	Sz	140.132	9.1739
PcyM_0217400	-3.74616	3.23914	Sz	383.243	25.6511
PcyM_0912900	-3.74678	1.60218	Sz	54.4915	3.03362
PcyM_1271400	-3.75005	1.96635	Sz	118.105	7.13609
PcyM_1459000	-3.75038	2.62812	Sz	88.1792	5.67596
PcyM_0725100	-3.75212	3.34482	Sz	28.8151	1.93045
PcyM_1120700	-3.75385	0.971957	Sz	16.0803	0.466064
PcyM_0202900	-3.75578	1.87998	Sz	1.9715	0.119549
PcyM_0940600	-3.7558	1.42436	Sz	14.5545	0.756957
PcyM_1407700	-3.75603	2.29852	Sz	161.239	9.93368
PcyM_1351900	-3.75647	2.44534	Sz	26.5523	1.6612
PcyM_0913500	-3.7565	2.03398	Sz	73.2095	4.37947
PcyM_1141100	-3.75663	3.70452	Sz	47.8412	3.23242
PcyM_1343800	-3.75664	1.24863	Sz	3.03264	0.142793
PcyM_1260900	-3.7569	3.48881	Sz	32.055	2.14937
PcyM_1125800	-3.75692	3.75692	Sz	121.906	8.25863
PcyM_1264500	-3.75741	2.58998	Sz	18.4702	1.18362
PcyM_1311800	-3.75883	1.88085	Sz	4.1064	0.23899
PcyM_0945300	-3.75933	3.5812	Sz	66.7521	4.48383
PcyM_1232800	-3.75952	4.3513	Sz	113.608	7.78001
PcyM_1025900	-3.76011	4.60921	Sz	548.973	37.7923
PcyM_1325100	-3.76152	2.37515	Sz	107.349	6.72533
PcyM_0418300	-3.76168	2.53303	Sz	402.168	25.4102
PcyM_0731300	-3.76188	2.94697	Sz	10.2915	0.672395
PcyM_0840700	-3.76197	3.33344	Sz	102.298	6.79355
PcyM_0421200	-3.76199	1.88467	Sz	20.8084	1.21697
PcyM_0606000	-3.76448	2.54099	Sz	91.498	5.81361
PcyM_0837900	-3.76452	4.10975	Sz	458.091	31.0981
PcyM_1314300	-3.76914	1.95132	Sz	95.9188	5.71266
PcyM_0623900	-3.76921	2.24422	Sz	48.621	3.00091
PcyM_0610300	-3.76921	3.57554	Sz	11.5518	0.769664
PcyM_0203600	-3.7709	2.83164	Sz	109.062	7.01851
PcyM_1225700	-3.77132	3.62079	Sz	1026.03	68.3261
PcyM_1437300	-3.77226	2.74535	Sz	299.547	19.1297
PcyM_1257300	-3.7727	3.24325	Sz	166.452	10.9159
PcyM_1273700	-3.77367	1.85636	Sz	14.8222	0.854589
PcyM_0814900	-3.77447	1.63436	Sz	28.4398	1.52965
PcyM_1034500	-3.77733	1.81002	Sz	1.76011	0.107916
PcyM_1448800	-3.77738	3.16208	Sz	42.6184	2.77226
PcyM_1245300	-3.77864	2.22272	Sz	165.988	10.0747
PcyM_0115100	-3.77944	3.2671	Sz	3.70581	0.243297
PcyM_0612500	-3.78063	1.85277	Sz	4.76509	0.258022
PcyM_1310300	-3.78184	2.1901	Sz	18.0793	1.11614
PcyM_0729600	-3.78214	1.50539	Sz	8.0843	0.419451
PcyM_1125300	-3.78357	1.36479	Sz	10.2083	0.476539
PcyM_0715000	-3.78416	1.6379	Sz	19.1299	1.03215
PcyM_1126400	-3.7852	2.60838	Sz	6.02729	0.378864
PcyM_0720800	-3.78627	1.50676	Sz	1.27302	0.069161
PcyM_1222500	-3.78665	1.54232	Sz	24.0252	1.26288
PcyM_1257700	-3.78777	2.91195	Sz	14.2865	0.910678
PcyM_0916000	-3.78923	1.32315	Sz	7.36253	0.352755
PcyM_0609100	-3.79054	1.72174	Sz	10.8225	0.592265
PcyM_0106100	-3.79118	2.63096	Sz	33.7745	2.09957
PcyM_1333900	-3.79175	2.71429	Sz	3.83829	0.24327
PcyM_1278100	-3.79196	2.18741	Sz	58.812	3.49967
PcyM_0526200	-3.79222	3.60572	Sz	350.536	22.9548
PcyM_0210900	-3.79223	2.52462	Sz	3.62792	0.222056
PcyM_1314800	-3.79372	3.73818	Sz	1073.56	70.5199
PcyM_1241300	-3.79466	2.41922	Sz	226.453	13.8074
PcyM_1429800	-3.79611	2.87873	Sz	127.496	8.04734
PcyM_1209200	-3.79618	2.65006	Sz	35.6128	2.20286
PcyM_0111300	-3.7976	2.67321	Sz	16.624	1.03435
PcyM_0115200	-3.7983	2.28366	Sz	17.6887	1.07078
PcyM_0912600	-3.79858	2.16394	Sz	26.9969	1.61601
PcyM_1022900	-3.79902	2.96198	Sz	313.949	19.8452
PcyM_1146100	-3.79922	2.24171	Sz	1.74499	0.10528
PcyM_1445500	-3.79994	2.16211	Sz	62.7583	3.68974
PcyM_1104000	-3.80192	2.65519	Sz	36.3728	2.26726
PcyM_1308800	-3.80262	1.75123	Sz	12.1043	0.648174
PcyM_0939400	-3.80402	4.64672	Sz	2149.28	143.269
PcyM_0706400	-3.80615	1.93182	Sz	11.7874	0.658302
PcyM_0906200	-3.80896	2.80316	Sz	158.699	9.85264
PcyM_0618300	-3.81129	3.07837	Sz	11.9112	0.761454
PcyM_0950700	-3.81189	4.43616	Sz	81.7194	5.3894
PcyM_0946500	-3.81253	2.73629	Sz	113.691	7.00067
PcyM_0836400	-3.81314	1.83698	Sz	129.955	7.25243
PcyM_1134300	-3.81623	3.20706	Sz	195.495	12.3464
PcyM_1247800	-3.81867	2.95861	Sz	107.277	6.6824
PcyM_0313200	-3.81906	1.92587	Sz	3.45469	0.190039
PcyM_0105900	-3.82009	3.52512	Sz	134.069	8.57678
PcyM_1147100	-3.82066	3.52335	Sz	119.115	7.60998
PcyM_0909400	-3.8211	3.1216	Sz	46.313	2.90508
PcyM_1344000	-3.82142	1.88103	Sz	13.5022	0.750184
PcyM_0702200	-3.82145	1.5383	Sz	8.2966	0.397021
PcyM_0835100	-3.82191	3.44292	Sz	174.043	11.0886
PcyM_1119000	-3.82333	3.62002	Sz	19.9923	1.28476
PcyM_1325400	-3.8254	2.82778	Sz	20.8859	1.28099
PcyM_1265400	-3.8256	2.37425	Sz	116.531	6.90824
PcyM_1270800	-3.82562	3.57274	Sz	78.6598	5.03106
PcyM_1315300	-3.82648	4.4823	Sz	99.5041	6.50177
PcyM_0107100	-3.82747	3.47005	Sz	247.836	15.7205
PcyM_1009400	-3.82929	2.891	Sz	26.8337	1.65027
PcyM_1343600	-3.82961	4.03037	Sz	55.0906	3.57163
PcyM_1426900	-3.82976	1.2483	Sz	1.29999	0.0601432
PcyM_1120000	-3.8305	2.56893	Sz	18.987	1.13547
PcyM_1448500	-3.83118	4.03592	Sz	85.6447	5.51443
PcyM_1314200	-3.83168	3.79083	Sz	29.479	1.88432
PcyM_0311100	-3.83209	1.62611	Sz	67.8948	3.50458
PcyM_0420800	-3.83502	1.54745	Sz	49.2495	2.41221
PcyM_0702500	-3.83541	1.37957	Sz	0.849335	0.0416267
PcyM_0603200	-3.83777	2.0024	Sz	28.325	1.58862
PcyM_0208400	-3.83795	2.30795	Sz	127.313	7.42073
PcyM_1248500	-3.83815	4.06724	Sz	621.497	39.8402
PcyM_1406600	-3.83854	1.87483	Sz	9.88093	0.533988
PcyM_1456800	-3.83968	3.64007	Sz	161.961	10.2348
PcyM_MT02600	-3.84085	1.44272	Sz	52.9538	2.20232
PcyM_1322700	-3.84161	3.46839	Sz	366.848	22.966
PcyM_0913900	-3.84288	2.94413	Sz	141.552	8.63985
PcyM_1010300	-3.84355	1.8871	Sz	79.6646	4.33994
PcyM_0216800	-3.84361	3.37287	Sz	84.99	5.3029
PcyM_1033800	-3.84641	3.94929	Sz	94.7666	6.03374
PcyM_0906900	-3.84691	4.20717	Sz	6272.3	400.9
PcyM_0821900	-3.84698	2.2643	Sz	48.5337	2.69034
PcyM_0509200	-3.84714	2.63806	Sz	38.493	2.28808
PcyM_0316300	-3.84759	2.15082	Sz	109.629	6.22177
PcyM_0312700	-3.84776	2.49155	Sz	3.18534	0.186514
PcyM_1434200	-3.84819	2.52153	Sz	19.8521	1.17113
PcyM_1259700	-3.84866	2.4707	Sz	12.6968	0.736915
PcyM_0206900	-3.84962	1.9283	Sz	59.4686	3.08788
PcyM_1472700	-3.85133	2.37278	Sz	7.46017	0.43468
PcyM_1318900	-3.85168	3.52868	Sz	140.032	8.73223
PcyM_0609700	-3.85182	3.1382	Sz	14.4016	0.884166
[truncated: 2,638 more rows]
