# Supplementary material for: A comparative transcriptomic analysis of replicating and dormant liver stages of the relapsing malaria parasite Plasmodium cynomolgi
Source: eLife. 2017 Dec 7;6:e29605. doi: 10.7554/eLife.29605 (PMC5758109; doi:10.7554/eLife.29605)
Supplement: Supplementary file 6. [file elife-29605-supp6.xlsx]

## Sheet: Supplementary_Table_6
Supplementary File 6: Orthology groups obtained from the mapping of P. cynomolgi proteins to the proteomes of the the following species: P. falciparum 3D7, P. berghei ANKA, P. knowlesi H, P. vivax Sal1, P. yoelii yoelii 17X, H. sapiens, D. melanogaster, M. musculus, R. norvegicus, and S. cerevisiae, related to Figure 3
Ortholog Group	Gene ID
G1_000006	PcyM_0001000
G1_000006	PcyM_0001900
G1_000006	PcyM_0002000
G1_000006	PcyM_0002100
G1_000006	PcyM_0002300
G1_000006	PcyM_0002400
G1_000006	PcyM_0003900
G1_000006	PcyM_0004100
G1_000006	PcyM_0004200
G1_000006	PcyM_0004500
G1_000006	PcyM_0004600
G1_000006	PcyM_0006400
G1_000006	PcyM_0006800
G1_000006	PcyM_0008000
G1_000006	PcyM_0008700
G1_000006	PcyM_0009000
G1_000006	PcyM_0009200
G1_000006	PcyM_0010500
G1_000006	PcyM_0011000
G1_000006	PcyM_0011300
G1_000006	PcyM_0011800
G1_000006	PcyM_0014400
G1_000006	PcyM_0015200
G1_000006	PcyM_0016000
G1_000006	PcyM_0017500
G1_000006	PcyM_0020700
G1_000006	PcyM_0021500
G1_000006	PcyM_0023200
G1_000006	PcyM_0023700
G1_000006	PcyM_0024400
G1_000006	PcyM_0024600
G1_000006	PcyM_0024700
G1_000006	PcyM_0024900
G1_000006	PcyM_0025000
G1_000006	PcyM_0025300
G1_000006	PcyM_0025500
G1_000006	PcyM_0025600
G1_000006	PcyM_0027100
G1_000006	PcyM_0027700
G1_000006	PcyM_0028900
G1_000006	PcyM_0029000
G1_000006	PcyM_0029700
G1_000006	PcyM_0032100
G1_000006	PcyM_0032300
G1_000006	PcyM_0032500
G1_000006	PcyM_0032900
G1_000006	PcyM_0033200
G1_000006	PcyM_0034200
G1_000006	PcyM_0035000
G1_000006	PcyM_0037700
G1_000006	PcyM_0037800
G1_000006	PcyM_0038100
G1_000006	PcyM_0038200
G1_000006	PcyM_0039200
G1_000006	PcyM_0042500
G1_000006	PcyM_0042600
G1_000006	PcyM_0042800
G1_000006	PcyM_0043100
G1_000006	PcyM_0044900
G1_000006	PcyM_0045000
G1_000006	PcyM_0045100
G1_000006	PcyM_0045300
G1_000006	PcyM_0047700
G1_000006	PcyM_0048600
G1_000006	PcyM_0048700
G1_000006	PcyM_0048800
G1_000006	PcyM_0049400
G1_000006	PcyM_0052400
G1_000006	PcyM_0053700
G1_000006	PcyM_0054100
G1_000006	PcyM_0055400
G1_000006	PcyM_0056100
G1_000006	PcyM_0057500
G1_000006	PcyM_0057900
G1_000006	PcyM_0059000
G1_000006	PcyM_0059700
G1_000006	PcyM_0059800
G1_000006	PcyM_0060000
G1_000006	PcyM_0060800
G1_000006	PcyM_0060900
G1_000006	PcyM_0061000
G1_000006	PcyM_0061400
G1_000006	PcyM_0061600
G1_000006	PcyM_0062800
G1_000006	PcyM_0064200
G1_000006	PcyM_0065400
G1_000006	PcyM_0066400
G1_000006	PcyM_0068300
G1_000006	PcyM_0070100
G1_000006	PcyM_0070400
G1_000006	PcyM_0070500
G1_000006	PcyM_0070900
G1_000006	PcyM_0071000
G1_000006	PcyM_0071400
G1_000006	PcyM_0071500
G1_000006	PcyM_0072000
G1_000006	PcyM_0072600
G1_000006	PcyM_0072900
G1_000006	PcyM_0073000
G1_000006	PcyM_0073100
G1_000006	PcyM_0073300
G1_000006	PcyM_0073400
G1_000006	PcyM_0073700
G1_000006	PcyM_0074400
G1_000006	PcyM_0074600
G1_000006	PcyM_0076600
G1_000006	PcyM_0077900
G1_000006	PcyM_0078200
G1_000006	PcyM_0078300
G1_000006	PcyM_0079700
G1_000006	PcyM_0080800
G1_000006	PcyM_0080900
G1_000006	PcyM_0081000
G1_000006	PcyM_0124000
G1_000006	PcyM_0300400
G1_000006	PcyM_0300600
G1_000006	PcyM_0301200
G1_000006	PcyM_0303000
G1_000006	PcyM_0330600
G1_000006	PcyM_0330800
G1_000006	PcyM_0332000
G1_000006	PcyM_0332900
G1_000006	PcyM_0500500
G1_000006	PcyM_0800100
G1_000006	PcyM_0901700
G1_000006	PcyM_0955600
G1_000006	PcyM_0956200
G1_000006	PcyM_0960800
G1_000006	PcyM_1036000
G1_000006	PcyM_1036300
G1_000006	PcyM_1036500
G1_000006	PcyM_1201600
G1_000006	PcyM_1283500
G1_000006	PcyM_1284200
G1_000006	PcyM_1285000
G1_000006	PcyM_1288100
G1_000006	PcyM_1300500
G1_000006	PcyM_1300700
G1_000006	PcyM_1400400
G1_000010	A0A0G2JVI3
G1_000010	F1LZI1
G1_000010	M0RCB1
G1_000010	O97125
G1_000010	P02825
G1_000010	P06761
G1_000010	P09435
G1_000010	P0CS90
G1_000010	P0DMV8
G1_000010	P0DMV9
G1_000010	P0DMW0
G1_000010	P0DMW1
G1_000010	P10591
G1_000010	P10592
G1_000010	P11021
G1_000010	P11142
G1_000010	P11146
G1_000010	P11147
G1_000010	P11484
G1_000010	P14659
G1_000010	P16474
G1_000010	P16627
G1_000010	P17066
G1_000010	P17156
G1_000010	P17879
G1_000010	P20029
G1_000010	P22202
G1_000010	P29843
G1_000010	P29844
G1_000010	P29845
G1_000010	P34931
G1_000010	P38646
G1_000010	P38647
G1_000010	P39987
G1_000010	P40150
G1_000010	P48721
G1_000010	P48741
G1_000010	P54652
G1_000010	P55063
G1_000010	P63017
G1_000010	P63018
G1_000010	P82910
G1_000010	PBANKA_0711900
G1_000010	PBANKA_0818900
G1_000010	PBANKA_0914400
G1_000010	PF3D7_0818900
G1_000010	PF3D7_0831700
G1_000010	PF3D7_0917900
G1_000010	PF3D7_1134000
G1_000010	PKNH_0715900
G1_000010	PKNH_0932200
G1_000010	PKNH_1312700
G1_000010	PVX_089425
G1_000010	PVX_092310
G1_000010	PVX_099315
G1_000010	PY17X_0712100
G1_000010	PY17X_0822200
G1_000010	PY17X_0915900
G1_000010	PcyM_0515400
G1_000010	PcyM_0716200
G1_000010	PcyM_0938800
G1_000010	Q05931
G1_000010	Q61696
G1_000010	Q8INI8
G1_000010	Q9BIR7
G1_000010	Q9BIS2
G1_000010	Q9VG58
G1_000012	A0A0G2JUL0
G1_000012	A0A0G2JUL6
G1_000012	A0A0G2JUM9
G1_000012	A0A0G2JVD7
G1_000012	A0A0G2JVX1
G1_000012	A0A0G2JVY3
G1_000012	A0A0G2JX86
G1_000012	A0A0G2JXA2
G1_000012	A0A0G2JZN4
G1_000012	A0A0G2JZP4
G1_000012	A0A0G2K002
G1_000012	A0A0G2K1P6
G1_000012	A0A0G2K1W6
G1_000012	A0A0G2K3S2
G1_000012	A0A0G2K3W3
G1_000012	A0A0G2K433
G1_000012	A0A0G2K4L9
G1_000012	A0A0G2K576
G1_000012	A0A0G2K5R1
G1_000012	A0A0G2K5Z0
G1_000012	A0A0G2K614
G1_000012	A0A0G2K683
G1_000012	A0A0G2K6A3
G1_000012	A0A0G2K7B5
G1_000012	A0A0G2K7H3
G1_000012	A0A0G2K9H1
G1_000012	A0A0G2K9M1
G1_000012	A0A0G2KB45
G1_000012	A0A0G2KBC8
G1_000012	E9PSR7
G1_000012	F6U8B9
G1_000012	F7E4S0
G1_000012	F7ESZ5
G1_000012	F7F9J5
G1_000012	F7FDC8
G1_000012	J3KMP5
G1_000012	J3QPK1
G1_000012	L7N228
G1_000012	L7N280
G1_000012	M0R449
G1_000012	M0R595
G1_000012	M0R5C9
G1_000012	M0R606
G1_000012	M0R6A8
G1_000012	M0R6H0
G1_000012	M0R6X6
G1_000012	M0R7G2
G1_000012	M0R9Y8
G1_000012	M0R9Y9
G1_000012	M0RAE2
G1_000012	M0RAH1
G1_000012	M0RAJ0
G1_000012	M0RAW8
G1_000012	M0RCX1
G1_000012	M0RD43
G1_000012	M0RD73
G1_000012	O00370
G1_000012	P11369
G1_000012	PcyM_0060200
G1_000012	PcyM_0060400
G1_000012	Q6QI82
G1_000013	A0A087WR13
G1_000013	A0A0B4KHJ4
G1_000013	A0A0B4LH20
G1_000013	A0A0G2JYL5
G1_000013	A8Y5B7
G1_000013	B1AR51
G1_000013	D3YYQ8
G1_000013	D4A599
G1_000013	E9PU24
G1_000013	E9Q0B6
G1_000013	E9Q0T8
G1_000013	E9Q7N9
G1_000013	E9Q8T7
G1_000013	F1LV07
G1_000013	F1LXT8
G1_000013	F1MAM6
G1_000013	L7N1Y0
G1_000013	M0R8U1
G1_000013	M0RAB9
G1_000013	P0C6F1
G1_000013	P36022
G1_000013	P37276
G1_000013	P38650
G1_000013	PBANKA_0214000
G1_000013	PF3D7_0729900
G1_000013	PKNH_0214800
G1_000013	PVX_081792
G1_000013	PY17X_0215400
G1_000013	PcyM_0219100
G1_000013	Q0E8P6
G1_000013	Q0KI05
G1_000013	Q14204
G1_000013	Q45VK7
G1_000013	Q5LJP0
G1_000013	Q63164
G1_000013	Q63170
G1_000013	Q69Z23
G1_000013	Q7KVA7
G1_000013	Q8BW94
G1_000013	Q8IVF4
G1_000013	Q8NCM8
G1_000013	Q8TD57
G1_000013	Q8TE73
G1_000013	Q8VHE6
G1_000013	Q8WXX0
G1_000013	Q91XQ0
G1_000013	Q96DT5
G1_000013	Q96JB1
G1_000013	Q9C0G6
G1_000013	Q9JHU4
G1_000013	Q9JJ79
G1_000013	Q9NYC9
G1_000013	Q9P225
G1_000013	Q9P2D7
G1_000013	Q9UFH2
G1_000013	Q9VAV5
G1_000013	Q9VJC6
G1_000013	Q9VWZ3
G1_000013	Q9VZ77
G1_000016	PcyM_0007900
G1_000016	PcyM_0011700
G1_000016	PcyM_0014200
G1_000016	PcyM_0015300
G1_000016	PcyM_0016100
G1_000016	PcyM_0018900
G1_000016	PcyM_0022800
G1_000016	PcyM_0024500
G1_000016	PcyM_0025100
G1_000016	PcyM_0026900
G1_000016	PcyM_0030600
G1_000016	PcyM_0032200
G1_000016	PcyM_0032400
G1_000016	PcyM_0039100
G1_000016	PcyM_0042900
G1_000016	PcyM_0043200
G1_000016	PcyM_0046200
G1_000016	PcyM_0051100
G1_000016	PcyM_0053300
G1_000016	PcyM_0056300
G1_000016	PcyM_0056400
G1_000016	PcyM_0058900
G1_000016	PcyM_0061500
G1_000016	PcyM_0061700
G1_000016	PcyM_0061800
G1_000016	PcyM_0065800
G1_000016	PcyM_0071700
G1_000016	PcyM_0071800
G1_000016	PcyM_0075100
G1_000016	PcyM_0201000
G1_000016	PcyM_0221600
G1_000016	PcyM_0221700
G1_000016	PcyM_0221800
G1_000016	PcyM_0302400
G1_000016	PcyM_0303100
G1_000016	PcyM_0303200
G1_000016	PcyM_0303300
G1_000016	PcyM_0303400
G1_000016	PcyM_0330700
G1_000016	PcyM_0331100
G1_000016	PcyM_0331200
G1_000016	PcyM_0331800
G1_000016	PcyM_0331900
G1_000016	PcyM_0333000
G1_000016	PcyM_0901600
G1_000016	PcyM_1035800
G1_000016	PcyM_1152500
G1_000016	PcyM_1152700
G1_000016	PcyM_1283700
G1_000016	PcyM_1287600
G1_000016	PcyM_1400300
G1_000016	PcyM_1400600
G1_000018	A0A0G2JTM6
G1_000018	A0A0G2K283
G1_000018	A1Z9L3
G1_000018	A2A4P0
G1_000018	A2ACQ1
G1_000018	D3ZD97
G1_000018	D3ZSV6
G1_000018	D4A321
G1_000018	G3X8X0
G1_000018	O35286
G1_000018	O43143
G1_000018	O60231
G1_000018	P15938
G1_000018	P20095
G1_000018	P24384
G1_000018	P53131
G1_000018	PBANKA_0514100
G1_000018	PBANKA_0818600
G1_000018	PBANKA_1140200
G1_000018	PBANKA_1446300
G1_000018	PF3D7_0917600
G1_000018	PF3D7_1030100
G1_000018	PF3D7_1231600
G1_000018	PF3D7_1364300
G1_000018	PKNH_0614800
G1_000018	PKNH_0715600
G1_000018	PKNH_1107000
G1_000018	PKNH_1451000
G1_000018	PVX_099300
G1_000018	PVX_100525
G1_000018	PVX_111220
G1_000018	PY17X_0515200
G1_000018	PY17X_0821900
G1_000018	PY17X_1141600
G1_000018	PY17X_1448800
G1_000018	PcyM_0618800
G1_000018	PcyM_0715900
G1_000018	PcyM_1107000
G1_000018	PcyM_1454200
G1_000018	Q14562
G1_000018	Q6MG13
G1_000018	Q7K3M5
G1_000018	Q80VY9
G1_000018	Q80X98
G1_000018	Q92620
G1_000018	Q9H5Z1
G1_000018	Q9H6R0
G1_000018	Q9VIZ3
G1_000018	Q9VL25
G1_000018	Q9VR29
G1_000018	Q9VY54
G1_000021	A5A3E0
G1_000021	B2RU33
G1_000021	D3ZRN3
G1_000021	H3BUK9
G1_000021	P02572
G1_000021	P02574
G1_000021	P0CG38
G1_000021	P0CG39
G1_000021	P10981
G1_000021	P10987
G1_000021	P45891
G1_000021	P53501
G1_000021	P60010
G1_000021	P60709
G1_000021	P60710
G1_000021	P60711
G1_000021	P62736
G1_000021	P62737
G1_000021	P62738
G1_000021	P63259
G1_000021	P63260
G1_000021	P63261
G1_000021	P63267
G1_000021	P63268
G1_000021	P63269
G1_000021	P68032
G1_000021	P68033
G1_000021	P68035
G1_000021	P68133
G1_000021	P68134
G1_000021	P68136
G1_000021	P83967
G1_000021	PBANKA_1030100
G1_000021	PBANKA_1459300
G1_000021	PF3D7_1246200
G1_000021	PF3D7_1412500
G1_000021	PKNH_1345800
G1_000021	PKNH_1465800
G1_000021	PVX_085830
G1_000021	PVX_101200
G1_000021	PY17X_1032500
G1_000021	PY17X_1461900
G1_000021	PcyM_1469700
G1_000021	Q562R1
G1_000021	Q6S8J3
G1_000021	Q8BFZ3
G1_000021	Q9BYX7
G1_000027	PBANKA_0304800
G1_000027	PBANKA_0304900
G1_000027	PBANKA_0305000
G1_000027	PBANKA_0305100
G1_000027	PF3D7_0207400
G1_000027	PF3D7_0207500
G1_000027	PF3D7_0207600
G1_000027	PF3D7_0207700
G1_000027	PF3D7_0207800
G1_000027	PF3D7_0207900
G1_000027	PF3D7_0208000
G1_000027	PF3D7_0902800
G1_000027	PKNH_0413100
G1_000027	PKNH_0413200
G1_000027	PKNH_0413400
G1_000027	PKNH_0413600
G1_000027	PKNH_0413700
G1_000027	PVX_003795
G1_000027	PVX_003800
G1_000027	PVX_003805
G1_000027	PVX_003810
G1_000027	PVX_003820
G1_000027	PVX_003825
G1_000027	PVX_003830
G1_000027	PVX_003835
G1_000027	PVX_003840
G1_000027	PVX_003845
G1_000027	PVX_003850
G1_000027	PY17X_0305400
G1_000027	PY17X_0305500
G1_000027	PY17X_0305600
G1_000027	PY17X_0305700
G1_000027	PcyM_0416000
G1_000027	PcyM_0416200
G1_000027	PcyM_0416300
G1_000027	PcyM_0416500
G1_000027	PcyM_0416600
G1_000027	PcyM_0416700
G1_000027	PcyM_0417100
G1_000027	PcyM_0417200
G1_000027	PcyM_0417300
G1_000027	PcyM_0417400
G1_000028	A0A0H2UHM7
G1_000028	A6NHL2
G1_000028	F1LUM5
G1_000028	P05213
G1_000028	P05214
G1_000028	P06603
G1_000028	P06604
G1_000028	P06605
G1_000028	P06606
G1_000028	P09733
G1_000028	P09734
G1_000028	P68363
G1_000028	P68366
G1_000028	P68368
G1_000028	P68369
G1_000028	P68370
G1_000028	P68373
G1_000028	PBANKA_0417700
G1_000028	PBANKA_0522700
G1_000028	PF3D7_0422300
G1_000028	PF3D7_0903700
G1_000028	PKNH_0514200
G1_000028	PKNH_0701400
G1_000028	PVX_090155
G1_000028	PVX_098630
G1_000028	PY17X_0420500
G1_000028	PY17X_0524100
G1_000028	PcyM_0532100
G1_000028	PcyM_0701400
G1_000028	Q13748
G1_000028	Q3UX10
G1_000028	Q5XIF6
G1_000028	Q68FR8
G1_000028	Q6AY56
G1_000028	Q6AYZ1
G1_000028	Q6P9V9
G1_000028	Q6PEY2
G1_000028	Q71U36
G1_000028	Q9BQE3
G1_000028	Q9JJZ2
G1_000028	Q9NY65
G1_000029	A0A0G2K3P7
G1_000029	A0A0G2KAZ5
G1_000029	A2ANX3
G1_000029	A3FIN4
G1_000029	B7YZF8
G1_000029	D3ZE62
G1_000029	D3ZFC5
G1_000029	D4A3X6
G1_000029	D4A509
G1_000029	D4A7K5
G1_000029	D4AA47
G1_000029	F1LUT4
G1_000029	M0R7E2
G1_000029	O43520
G1_000029	O60423
G1_000029	P32660
G1_000029	P39524
G1_000029	P70704
G1_000029	P98196
G1_000029	P98197
G1_000029	P98198
G1_000029	P98199
G1_000029	P98200
G1_000029	PBANKA_1434800
G1_000029	PF3D7_1219600
G1_000029	PKNH_1438800
G1_000029	PVX_123625
G1_000029	PY17X_1437200
G1_000029	PcyM_1439700
G1_000029	Q12675
G1_000029	Q148W0
G1_000029	Q6DFW5
G1_000029	Q6UQ17
G1_000029	Q8NB49
G1_000029	Q8TF62
G1_000029	Q9NTI2
G1_000029	Q9QZW0
G1_000029	Q9VGD4
G1_000029	Q9VXG7
G1_000029	Q9Y2G3
G1_000029	Q9Y2Q0
G1_000032	A0A0G2K6E3
G1_000032	B0I1T2
G1_000032	D3ZJP6
G1_000032	D4A7X9
G1_000032	E9Q634
G1_000032	F8VQB6
G1_000032	M0R829
G1_000032	O00159
G1_000032	O00160
G1_000032	O43795
G1_000032	O88329
G1_000032	O94832
G1_000032	P36006
G1_000032	P46735
G1_000032	P70248
G1_000032	PBANKA_1355700
G1_000032	PF3D7_1342600
G1_000032	PKNH_1258800
G1_000032	PVX_083030
G1_000032	PY17X_1361400
G1_000032	PcyM_1214000
G1_000032	Q04439
G1_000032	Q05096
G1_000032	Q12965
G1_000032	Q23978
G1_000032	Q23979
G1_000032	Q4AB27
G1_000032	Q5SUA5
G1_000032	Q5SYD0
G1_000032	Q62774
G1_000032	Q63355
G1_000032	Q63356
G1_000032	Q63357
G1_000032	Q8N1T3
G1_000032	Q9D6A1
G1_000032	Q9HD67
G1_000032	Q9UBC5
G1_000032	Q9WTI7
G1_000033	A2AQ07
G1_000033	A6NNZ2
G1_000033	B4F7C2
G1_000033	I3L2F9
G1_000033	M0R8B6
G1_000033	P02557
G1_000033	P04350
G1_000033	P07437
G1_000033	P08841
G1_000033	P61857
G1_000033	P68371
G1_000033	P68372
G1_000033	P69897
G1_000033	P85108
G1_000033	P99024
G1_000033	PBANKA_1206900
G1_000033	PF3D7_1008700
G1_000033	PKNH_0807700
G1_000033	PVX_094635
G1_000033	PY17X_1210100
G1_000033	PcyM_0808300
G1_000033	Q13509
G1_000033	Q13885
G1_000033	Q24560
G1_000033	Q3KRE8
G1_000033	Q3ZCM7
G1_000033	Q4QQV0
G1_000033	Q4QRB4
G1_000033	Q6P9T8
G1_000033	Q7TMM9
G1_000033	Q8MST5
G1_000033	Q922F4
G1_000033	Q9BUF5
G1_000033	Q9BVA1
G1_000033	Q9CWF2
G1_000033	Q9D6F9
G1_000033	Q9ERD7
G1_000033	Q9H4B7
G1_000042	PVX_053190
G1_000042	PcyM_0006000
G1_000042	PcyM_0009300
G1_000042	PcyM_0015100
G1_000042	PcyM_0016400
G1_000042	PcyM_0017200
G1_000042	PcyM_0017800
G1_000042	PcyM_0028200
G1_000042	PcyM_0030800
G1_000042	PcyM_0031700
G1_000042	PcyM_0033800
G1_000042	PcyM_0035100
G1_000042	PcyM_0035700
G1_000042	PcyM_0040100
G1_000042	PcyM_0043400
G1_000042	PcyM_0050000
G1_000042	PcyM_0051400
G1_000042	PcyM_0054400
G1_000042	PcyM_0062000
G1_000042	PcyM_0063100
G1_000042	PcyM_0066700
G1_000042	PcyM_0072800
G1_000042	PcyM_0075300
G1_000042	PcyM_0101400
G1_000042	PcyM_0222100
G1_000042	PcyM_0301900
G1_000042	PcyM_0333400
G1_000042	PcyM_0536300
G1_000042	PcyM_0955200
G1_000042	PcyM_1201700
G1_000042	PcyM_1283200
G1_000042	PcyM_1356300
G1_000042	PcyM_1400100
G1_000045	PcyM_0004300
G1_000045	PcyM_0008100
G1_000045	PcyM_0014300
G1_000045	PcyM_0014500
G1_000045	PcyM_0015900
G1_000045	PcyM_0027800
G1_000045	PcyM_0029400
G1_000045	PcyM_0038400
G1_000045	PcyM_0039300
G1_000045	PcyM_0043000
G1_000045	PcyM_0046300
G1_000045	PcyM_0048400
G1_000045	PcyM_0049200
G1_000045	PcyM_0051200
G1_000045	PcyM_0053400
G1_000045	PcyM_0053900
G1_000045	PcyM_0055000
G1_000045	PcyM_0055700
G1_000045	PcyM_0056500
G1_000045	PcyM_0057300
G1_000045	PcyM_0063900
G1_000045	PcyM_0065300
G1_000045	PcyM_0065600
G1_000045	PcyM_0074200
G1_000045	PcyM_0301100
G1_000045	PcyM_0302300
G1_000045	PcyM_0333100
G1_000045	PcyM_0955800
G1_000045	PcyM_1200300
G1_000045	PcyM_1283800
G1_000045	PcyM_1284400
G1_000045	PcyM_1400500
G1_000049	A0A0G2JYY8
G1_000049	A0A0G2K3I6
G1_000049	A0A0G2K7M1
G1_000049	A0A0G2K8S2
G1_000049	D3YYI5
G1_000049	D3ZGY4
G1_000049	D3ZQT0
G1_000049	D3ZWV2
G1_000049	E9PTN6
G1_000049	E9PTV9
G1_000049	F1LU03
G1_000049	F1LUV3
G1_000049	F1M4G6
G1_000049	M0R590
G1_000049	M0R660
G1_000049	P00359
G1_000049	P00360
G1_000049	P04406
G1_000049	P04797
G1_000049	P07486
G1_000049	P07487
G1_000049	P16858
G1_000049	PBANKA_1326400
G1_000049	PF3D7_1462800
G1_000049	PKNH_1218700
G1_000049	PVX_117322
G1_000049	PY17X_1330200
G1_000049	PcyM_1250000
G1_000049	Q498M9
G1_000049	S4R1W1
G1_000052	P02828
G1_000052	P02829
G1_000052	P07900
G1_000052	P07901
G1_000052	P08113
G1_000052	P08238
G1_000052	P11499
G1_000052	P14625
G1_000052	P15108
G1_000052	P34058
G1_000052	P82995
G1_000052	PBANKA_0805700
G1_000052	PBANKA_1437300
G1_000052	PF3D7_0708400
G1_000052	PF3D7_1222300
G1_000052	PKNH_0107000
G1_000052	PKNH_1441400
G1_000052	PVX_087950
G1_000052	PVX_123745
G1_000052	PY17X_0808800
G1_000052	PY17X_1439800
G1_000052	PcyM_0109400
G1_000052	PcyM_1442300
G1_000052	Q14568
G1_000052	Q58FF3
G1_000052	Q58FF6
G1_000052	Q58FF7
G1_000052	Q66HD0
G1_000052	Q9VAY2
G1_000058	PcyM_0000400
G1_000058	PcyM_0003600
G1_000058	PcyM_0008500
G1_000058	PcyM_0014800
G1_000058	PcyM_0023800
G1_000058	PcyM_0027500
G1_000058	PcyM_0035900
G1_000058	PcyM_0039600
G1_000058	PcyM_0046800
G1_000058	PcyM_0058100
G1_000058	PcyM_0066100
G1_000058	PcyM_0067100
G1_000058	PcyM_0074800
G1_000058	PcyM_0301500
G1_000058	PcyM_0331500
G1_000058	PcyM_0400300
G1_000058	PcyM_0536900
G1_000058	PcyM_0959400
G1_000058	PcyM_0959500
G1_000058	PcyM_0959800
G1_000058	PcyM_0959900
G1_000058	PcyM_0960000
G1_000058	PcyM_1201000
G1_000058	PcyM_1202000
G1_000058	PcyM_1202100
G1_000058	PcyM_1202300
G1_000058	PcyM_1202500
G1_000058	PcyM_1401100
G1_000059	PcyM_0005100
G1_000059	PcyM_0005700
G1_000059	PcyM_0007300
G1_000059	PcyM_0009500
G1_000059	PcyM_0010600
G1_000059	PcyM_0011500
G1_000059	PcyM_0016900
G1_000059	PcyM_0022500
G1_000059	PcyM_0026200
G1_000059	PcyM_0029300
G1_000059	PcyM_0030300
G1_000059	PcyM_0031800
G1_000059	PcyM_0036800
G1_000059	PcyM_0040400
G1_000059	PcyM_0041300
G1_000059	PcyM_0043800
G1_000059	PcyM_0050200
G1_000059	PcyM_0059200
G1_000059	PcyM_0064600
G1_000059	PcyM_0067000
G1_000059	PcyM_0067700
G1_000059	PcyM_0076100
G1_000059	PcyM_0201100
G1_000059	PcyM_0222600
G1_000059	PcyM_0954900
G1_000059	PcyM_0958200
G1_000059	PcyM_1282900
G1_000059	PcyM_1355900
G1_000060	PVX_078695
G1_000060	PcyM_0001200
G1_000060	PcyM_0006200
G1_000060	PcyM_0012000
G1_000060	PcyM_0014000
G1_000060	PcyM_0016500
G1_000060	PcyM_0016600
G1_000060	PcyM_0017300
G1_000060	PcyM_0021300
G1_000060	PcyM_0028300
G1_000060	PcyM_0035200
G1_000060	PcyM_0043500
G1_000060	PcyM_0044300
G1_000060	PcyM_0051300
G1_000060	PcyM_0052900
G1_000060	PcyM_0063000
G1_000060	PcyM_0064400
G1_000060	PcyM_0066600
G1_000060	PcyM_0077300
G1_000060	PcyM_0101200
G1_000060	PcyM_0200300
G1_000060	PcyM_0221100
G1_000060	PcyM_0222200
G1_000060	PcyM_0600300
G1_000060	PcyM_0955400
G1_000060	PcyM_0958100
G1_000060	PcyM_1037400
G1_000060	PcyM_1283300
G1_000070	PcyM_0005900
G1_000070	PcyM_0009400
G1_000070	PcyM_0017100
G1_000070	PcyM_0028100
G1_000070	PcyM_0031600
G1_000070	PcyM_0033700
G1_000070	PcyM_0035600
G1_000070	PcyM_0040200
G1_000070	PcyM_0041100
G1_000070	PcyM_0044000
G1_000070	PcyM_0045500
G1_000070	PcyM_0047400
G1_000070	PcyM_0050100
G1_000070	PcyM_0063200
G1_000070	PcyM_0064500
G1_000070	PcyM_0066800
G1_000070	PcyM_0222800
G1_000070	PcyM_0329800
G1_000070	PcyM_0400500
G1_000070	PcyM_0955100
G1_000070	PcyM_0956600
G1_000070	PcyM_0956700
G1_000070	PcyM_1283100
G1_000070	PcyM_1300200
G1_000070	PcyM_1300800
G1_000070	PcyM_1300900
G1_000070	PcyM_1356200
G1_000071	PVX_001610
G1_000071	PcyM_0004400
G1_000071	PcyM_0014600
G1_000071	PcyM_0019500
G1_000071	PcyM_0019600
G1_000071	PcyM_0023600
G1_000071	PcyM_0029500
G1_000071	PcyM_0038500
G1_000071	PcyM_0048300
G1_000071	PcyM_0049100
G1_000071	PcyM_0053500
G1_000071	PcyM_0055100
G1_000071	PcyM_0057200
G1_000071	PcyM_0059900
G1_000071	PcyM_0063800
G1_000071	PcyM_0068900
G1_000071	PcyM_0071200
G1_000071	PcyM_0071300
G1_000071	PcyM_0073200
G1_000071	PcyM_0074300
G1_000071	PcyM_0078500
G1_000071	PcyM_0301000
G1_000071	PcyM_0302200
G1_000071	PcyM_0955900
G1_000071	PcyM_1200200
G1_000071	PcyM_1283900
G1_000071	PcyM_1284500
G1_000073	A0A0N4SVP8
G1_000073	E9PV04
G1_000073	P10081
G1_000073	P10630
G1_000073	P38919
G1_000073	P60842
G1_000073	P60843
G1_000073	PBANKA_0523100
G1_000073	PBANKA_1331900
G1_000073	PF3D7_0422700
G1_000073	PF3D7_1468700
G1_000073	PKNH_0514600
G1_000073	PKNH_1212500
G1_000073	PVX_090175
G1_000073	PVX_117030
G1_000073	PY17X_0524500
G1_000073	PY17X_1336600
G1_000073	PcyM_1243500
G1_000073	Q02748
G1_000073	Q12099
G1_000073	Q14240
G1_000073	Q3B8Q2
G1_000073	Q5RKI1
G1_000073	Q6P3V8
G1_000073	Q91VC3
G1_000073	Q9VHS8
G1_000078	PVX_004503
G1_000078	PVX_006080
G1_000078	PVX_010100
G1_000078	PVX_011110
G1_000078	PVX_013120
G1_000078	PVX_015130
G1_000078	PVX_016640
G1_000078	PVX_017145
G1_000078	PVX_017650
G1_000078	PVX_019165
G1_000078	PVX_020675
G1_000078	PVX_021180
G1_000078	PVX_055190
G1_000078	PVX_062690
G1_000078	PVX_066190
G1_000078	PVX_068190
G1_000078	PVX_068690
G1_000078	PVX_093705
G1_000078	PVX_101617
G1_000078	PVX_103150
G1_000078	PVX_104700
G1_000078	PVX_107230
G1_000078	PVX_112125
G1_000078	PVX_124708
G1_000078	PVX_241295
G1_000078	PcyM_0123000
G1_000082	F1M6C2
G1_000082	M0R757
G1_000082	P02994
G1_000082	P05303
G1_000082	P08736
G1_000082	P10126
G1_000082	P62630
G1_000082	P62631
G1_000082	P62632
G1_000082	P68104
G1_000082	PBANKA_1133300
G1_000082	PBANKA_1133400
G1_000082	PF3D7_1357000
G1_000082	PF3D7_1357100
G1_000082	PKNH_1114400
G1_000082	PKNH_1114500
G1_000082	PVX_114830
G1_000082	PVX_114832
G1_000082	PVX_138260
G1_000082	PY17X_1134800
G1_000082	PY17X_1134900
G1_000082	PcyM_1114600
G1_000082	PcyM_1114700
G1_000082	Q05639
G1_000082	Q5VTE0
G1_000088	PVX_096937
G1_000088	PcyM_0000700
G1_000088	PcyM_0007700
G1_000088	PcyM_0020300
G1_000088	PcyM_0020600
G1_000088	PcyM_0023100
G1_000088	PcyM_0026600
G1_000088	PcyM_0034700
G1_000088	PcyM_0036900
G1_000088	PcyM_0037200
G1_000088	PcyM_0049600
G1_000088	PcyM_0058300
G1_000088	PcyM_0064300
G1_000088	PcyM_0070600
G1_000088	PcyM_0078000
G1_000088	PcyM_0202100
G1_000088	PcyM_0330400
G1_000088	PcyM_0331600
G1_000088	PcyM_0500600
G1_000088	PcyM_0960700
G1_000088	PcyM_0960900
G1_000088	PcyM_1036900
G1_000088	PcyM_1200600
G1_000088	PcyM_1201200
G1_000088	PcyM_1287500
G1_000089	P11166
G1_000089	P11167
G1_000089	P11168
G1_000089	P11169
G1_000089	P12336
G1_000089	P13181
G1_000089	P14142
G1_000089	P14246
G1_000089	P14672
G1_000089	P17809
G1_000089	P19357
G1_000089	P30605
G1_000089	P32037
G1_000089	P38142
G1_000089	P38695
G1_000089	P40885
G1_000089	PBANKA_0302500
G1_000089	PF3D7_0204700
G1_000089	PKNH_0416200
G1_000089	PVX_003665
G1_000089	PY17X_0303100
G1_000089	PcyM_0420100
G1_000089	Q07647
G1_000089	Q8IRI6
G1_000089	Q8TDB8
G1_000091	D4AE24
G1_000091	P06244
G1_000091	P18961
G1_000091	P23443
G1_000091	P31749
G1_000091	P31750
G1_000091	P31751
G1_000091	P47196
G1_000091	P47197
G1_000091	P67999
G1_000091	PBANKA_1460000
G1_000091	PF3D7_1246900
G1_000091	PKNH_1466600
G1_000091	PVX_101240
G1_000091	PY17X_1462600
G1_000091	PcyM_1470500
G1_000091	Q60823
G1_000091	Q63484
G1_000091	Q8BSK8
G1_000091	Q8INB9
G1_000091	Q94533
G1_000091	Q9UBS0
G1_000091	Q9WUA6
G1_000091	Q9Y243
G1_000091	Q9Z1M4
G1_000093	B5X0E4
G1_000093	D4AEL4
G1_000093	O70127
G1_000093	O95342
G1_000093	P06795
G1_000093	P08183
G1_000093	P12866
G1_000093	P21439
G1_000093	P21440
G1_000093	P21447
G1_000093	P43245
G1_000093	PBANKA_1237800
G1_000093	PF3D7_0523000
G1_000093	PKNH_1009900
G1_000093	PVX_080100
G1_000093	PY17X_1241000
G1_000093	PcyM_1008800
G1_000093	Q00449
G1_000093	Q00748
G1_000093	Q08201
G1_000093	Q2M3G0
G1_000093	Q5BI62
G1_000093	Q9QY30
G1_000093	Q9VRW2
G1_000095	A0A0G2JW72
G1_000095	A1ZBF7
G1_000095	G3V887
G1_000095	P15920
G1_000095	P25286
G1_000095	P32563
G1_000095	P37296
G1_000095	PBANKA_1223800
G1_000095	PF3D7_0806800
G1_000095	PKNH_0112000
G1_000095	PVX_088205
G1_000095	PY17X_1227000
G1_000095	PcyM_0115100
G1_000095	Q13488
G1_000095	Q920R6
G1_000095	Q93050
G1_000095	Q9HBG4
G1_000095	Q9JHF5
G1_000095	Q9VE75
G1_000095	Q9VE77
G1_000095	Q9VKF6
G1_000095	Q9XZ10
G1_000095	Q9Y487
G1_000095	Q9Z1G4
G1_000102	PcyM_0000100
G1_000102	PcyM_0003300
G1_000102	PcyM_0003800
G1_000102	PcyM_0015000
G1_000102	PcyM_0031100
G1_000102	PcyM_0036100
G1_000102	PcyM_0037300
G1_000102	PcyM_0039400
G1_000102	PcyM_0047000
G1_000102	PcyM_0048100
G1_000102	PcyM_0058400
G1_000102	PcyM_0068600
G1_000102	PcyM_0069700
G1_000102	PcyM_0072300
G1_000102	PcyM_0100500
G1_000102	PcyM_0221000
G1_000102	PcyM_0301300
G1_000102	PcyM_0329400
G1_000102	PcyM_0901400
G1_000102	PcyM_0960200
G1_000102	PcyM_1037200
G1_000102	PcyM_1201800
G1_000102	PcyM_1287200
G1_000102	PcyM_1401300
G1_000103	PVX_048690
G1_000103	PcyM_0005200
G1_000103	PcyM_0007400
G1_000103	PcyM_0015600
G1_000103	PcyM_0020400
G1_000103	PcyM_0026300
G1_000103	PcyM_0032700
G1_000103	PcyM_0034400
G1_000103	PcyM_0036700
G1_000103	PcyM_0039900
G1_000103	PcyM_0049900
G1_000103	PcyM_0051800
G1_000103	PcyM_0052100
G1_000103	PcyM_0060100
G1_000103	PcyM_0067600
G1_000103	PcyM_0070200
G1_000103	PcyM_0070800
G1_000103	PcyM_0077700
G1_000103	PcyM_0300800
G1_000103	PcyM_0500300
G1_000103	PcyM_0956000
G1_000103	PcyM_0958900
G1_000103	PcyM_1036700
G1_000103	PcyM_1200800
G1_000104	PF3D7_0402200
G1_000104	PcyM_0001800
G1_000104	PcyM_0003400
G1_000104	PcyM_0007800
G1_000104	PcyM_0008300
G1_000104	PcyM_0020800
G1_000104	PcyM_0023400
G1_000104	PcyM_0026700
G1_000104	PcyM_0028500
G1_000104	PcyM_0034300
G1_000104	PcyM_0038900
G1_000104	PcyM_0052700
G1_000104	PcyM_0058700
G1_000104	PcyM_0067800
G1_000104	PcyM_0069600
G1_000104	PcyM_0124100
G1_000104	PcyM_0330500
G1_000104	PcyM_0331700
G1_000104	PcyM_0400100
G1_000104	PcyM_0960300
G1_000104	PcyM_1037000
G1_000104	PcyM_1201100
G1_000104	PcyM_1258100
G1_000104	PcyM_1400900
G1_000106	M0R3X7
G1_000106	O08528
G1_000106	P04806
G1_000106	P04807
G1_000106	P05708
G1_000106	P17710
G1_000106	P19367
G1_000106	P27881
G1_000106	P27926
G1_000106	P52789
G1_000106	P52790
G1_000106	PBANKA_1122900
G1_000106	PF3D7_0624000
G1_000106	PKNH_1126200
G1_000106	PVX_114315
G1_000106	PY17X_1124300
G1_000106	PcyM_1126200
G1_000106	Q2TB90
G1_000106	Q3TRM8
G1_000106	Q7JYW9
G1_000106	Q91W97
G1_000106	Q9NFT7
G1_000106	Q9W330
G1_000108	F1M9V3
G1_000108	M0R5J4
G1_000108	P00924
G1_000108	P00925
G1_000108	P04764
G1_000108	P06733
G1_000108	P07323
G1_000108	P09104
G1_000108	P0CX10
G1_000108	P0CX11
G1_000108	P13929
G1_000108	P15007
G1_000108	P15429
G1_000108	P17182
G1_000108	P17183
G1_000108	P21550
G1_000108	P42222
G1_000108	PBANKA_1214300
G1_000108	PF3D7_1015900
G1_000108	PKNH_0816200
G1_000108	PVX_095015
G1_000108	PY17X_1217500
G1_000108	PcyM_0816700
G1_000111	PVX_086870
G1_000111	PcyM_0005400
G1_000111	PcyM_0007600
G1_000111	PcyM_0020200
G1_000111	PcyM_0020500
G1_000111	PcyM_0021900
G1_000111	PcyM_0026500
G1_000111	PcyM_0034600
G1_000111	PcyM_0036600
G1_000111	PcyM_0039700
G1_000111	PcyM_0041700
G1_000111	PcyM_0049700
G1_000111	PcyM_0051600
G1_000111	PcyM_0052200
G1_000111	PcyM_0056900
G1_000111	PcyM_0067400
G1_000111	PcyM_0070700
G1_000111	PcyM_0075600
G1_000111	PcyM_0077500
G1_000111	PcyM_0500100
G1_000111	PcyM_0958800
G1_000111	PcyM_1036800
G1_000111	PcyM_1200700
G1_000112	PVX_031690
G1_000112	PVX_145260
G1_000112	PcyM_0008200
G1_000112	PcyM_0009600
G1_000112	PcyM_0016800
G1_000112	PcyM_0024100
G1_000112	PcyM_0036300
G1_000112	PcyM_0038600
G1_000112	PcyM_0039000
G1_000112	PcyM_0041400
G1_000112	PcyM_0042400
G1_000112	PcyM_0043700
G1_000112	PcyM_0055300
G1_000112	PcyM_0065200
G1_000112	PcyM_0069400
G1_000112	PcyM_0075200
G1_000112	PcyM_0201300
G1_000112	PcyM_0222500
G1_000112	PcyM_0901100
G1_000112	PcyM_0954800
G1_000112	PcyM_1152900
G1_000112	PcyM_1287800
G1_000112	PcyM_1355800
G1_000114	D4AD35
G1_000114	O35643
G1_000114	P36000
G1_000114	P52303
G1_000114	P62944
G1_000114	P63010
G1_000114	PBANKA_0214300
G1_000114	PBANKA_1242700
G1_000114	PF3D7_0528100
G1_000114	PF3D7_0730200
G1_000114	PKNH_0215100
G1_000114	PKNH_1004600
G1_000114	PVX_079845
G1_000114	PVX_081805
G1_000114	PY17X_0215700
G1_000114	PY17X_1246100
G1_000114	PcyM_0219400
G1_000114	PcyM_1003400
G1_000114	Q10567
G1_000114	Q24253
G1_000114	Q9DBG3
G1_000114	Q9WV76
G1_000114	Q9Y6B7
G1_000117	A0A0A0MSL8
G1_000117	B5DF91
G1_000117	M9PBZ2
G1_000117	O09032
G1_000117	P16914
G1_000117	P26378
G1_000117	P70372
G1_000117	PBANKA_1135700
G1_000117	PF3D7_1359400
G1_000117	PKNH_1111900
G1_000117	PVX_114940
G1_000117	PY17X_1137200
G1_000117	PcyM_1112200
G1_000117	Q12926
G1_000117	Q14576
G1_000117	Q15717
G1_000117	Q60899
G1_000117	Q60900
G1_000117	Q61701
G1_000117	Q76IJ9
G1_000117	Q8CH84
G1_000117	Q9VYI0
G1_000127	D3ZIE5
G1_000127	F1LNL2
G1_000127	F1M7H3
G1_000127	M0R3Y7
G1_000127	O60264
G1_000127	P28370
G1_000127	P38144
G1_000127	P43610
G1_000127	PBANKA_0312700
G1_000127	PBANKA_0942700
G1_000127	PF3D7_1104200
G1_000127	PKNH_0901800
G1_000127	PVX_090890
G1_000127	PY17X_0313200
G1_000127	PY17X_0945200
G1_000127	PcyM_0906000
G1_000127	Q08773
G1_000127	Q24368
G1_000127	Q60848
G1_000127	Q6PGB8
G1_000127	Q91ZW3
G1_000127	Q9NRZ9
G1_000128	B5DFB2
G1_000128	D4A250
G1_000128	P13712
G1_000128	P39984
G1_000128	PBANKA_1011600
G1_000128	PBANKA_1344300
G1_000128	PF3D7_1329300
G1_000128	PF3D7_1433300
G1_000128	PKNH_0419900
G1_000128	PKNH_1271100
G1_000128	PVX_082410
G1_000128	PVX_084870
G1_000128	PY17X_1013100
G1_000128	PY17X_1349100
G1_000128	PcyM_1228600
G1_000128	PcyM_1318400
G1_000128	Q09028
G1_000128	Q16576
G1_000128	Q24572
G1_000128	Q60972
G1_000128	Q60973
G1_000128	Q71UF4
G1_000129	O35186
G1_000129	O70370
G1_000129	P00786
G1_000129	P09668
G1_000129	P25774
G1_000129	P43235
G1_000129	P49935
G1_000129	P55097
G1_000129	PBANKA_0932400
G1_000129	PF3D7_1115400
G1_000129	PF3D7_1115700
G1_000129	PKNH_0912800
G1_000129	PKNH_0912900
G1_000129	PKNH_0913000
G1_000129	PVX_091405
G1_000129	PVX_091410
G1_000129	PVX_091415
G1_000129	PY17X_0934400
G1_000129	PcyM_0917600
G1_000129	PcyM_0917700
G1_000129	PcyM_0917900
G1_000129	Q02765
G1_000134	D4ABJ9
G1_000134	O00767
G1_000134	P07308
G1_000134	P13011
G1_000134	P13516
G1_000134	P21147
G1_000134	PBANKA_1110700
G1_000134	PF3D7_0511200
G1_000134	PKNH_1022400
G1_000134	PVX_080675
G1_000134	PY17X_1111900
G1_000134	PcyM_1021900
G1_000134	Q6P7B9
G1_000134	Q6T707
G1_000134	Q7K4Y0
G1_000134	Q86SK9
G1_000134	Q99PL7
G1_000134	Q9VFX5
G1_000134	Q9VG68
G1_000134	Q9VTD4
G1_000134	Z4YNJ9
G1_000139	D3ZI07
G1_000139	F1LQZ3
G1_000139	O14782
G1_000139	O15066
G1_000139	O35066
G1_000139	O55165
G1_000139	P28741
G1_000139	P28743
G1_000139	P32364
G1_000139	P46867
G1_000139	PBANKA_0202700
G1_000139	PF3D7_0111000
G1_000139	PF3D7_1211000
G1_000139	PKNH_0202500
G1_000139	PVX_081250
G1_000139	PY17X_0204100
G1_000139	PcyM_0205600
G1_000139	Q61771
G1_000139	Q9V4A1
G1_000139	Q9VRK9
G1_000139	Q9Y496
G1_000141	P12982
G1_000141	P32598
G1_000141	P36873
G1_000141	P48461
G1_000141	P48462
G1_000141	P62136
G1_000141	P62137
G1_000141	P62138
G1_000141	P62140
G1_000141	P62141
G1_000141	P62142
G1_000141	P63087
G1_000141	P63088
G1_000141	PBANKA_1028300
G1_000141	PF3D7_1414400
G1_000141	PKNH_1343700
G1_000141	PVX_085730
G1_000141	PY17X_1030700
G1_000141	PcyM_1340500
G1_000141	Q05547
G1_000142	E2CWF0
G1_000142	P14747
G1_000142	P16298
G1_000142	P20651
G1_000142	P23287
G1_000142	P48453
G1_000142	P48454
G1_000142	P48455
G1_000142	P48456
G1_000142	P63328
G1_000142	P63329
G1_000142	PBANKA_1227400
G1_000142	PF3D7_0802800
G1_000142	PKNH_0116100
G1_000142	PVX_093605
G1_000142	PY17X_1230900
G1_000142	PcyM_0119700
G1_000142	Q08209
G1_000142	Q27889
G1_000142	Q9VXF1
G1_000143	D3YYI8
G1_000143	D3ZVU7
G1_000143	F7ENH8
G1_000143	O09106
G1_000143	O15379
G1_000143	O88895
G1_000143	P32561
G1_000143	P70288
G1_000143	PBANKA_0826500
G1_000143	PF3D7_0925700
G1_000143	PKNH_0723600
G1_000143	PVX_099700
G1_000143	PY17X_0829800
G1_000143	PcyM_0724900
G1_000143	Q13547
G1_000143	Q4QQW4
G1_000143	Q6P6W3
G1_000143	Q7KTS4
G1_000143	Q92769
G1_000143	Q94517
G1_000144	A6ZI46
G1_000144	A6ZI47
G1_000144	P00884
G1_000144	P04075
G1_000144	P05062
G1_000144	P05063
G1_000144	P05064
G1_000144	P05065
G1_000144	P07764
G1_000144	P09117
G1_000144	P09972
G1_000144	PBANKA_1308600
G1_000144	PF3D7_1444800
G1_000144	PKNH_1237500
G1_000144	PVX_118255
G1_000144	PY17X_1312400
G1_000144	PcyM_1271000
G1_000144	Q6AY07
G1_000144	Q91Y97
G1_000144	Q9VBF5
G1_000151	PVX_241290
G1_000151	PcyM_0001100
G1_000151	PcyM_0006300
G1_000151	PcyM_0014100
G1_000151	PcyM_0017400
G1_000151	PcyM_0018200
G1_000151	PcyM_0021400
G1_000151	PcyM_0028400
G1_000151	PcyM_0037900
G1_000151	PcyM_0044400
G1_000151	PcyM_0045200
G1_000151	PcyM_0062900
G1_000151	PcyM_0066500
G1_000151	PcyM_0079200
G1_000151	PcyM_0900100
G1_000151	PcyM_0955500
G1_000151	PcyM_1035900
G1_000151	PcyM_1037500
G1_000151	PcyM_1037600
G1_000151	PcyM_1283400
G1_000154	P00367
G1_000154	P07262
G1_000154	P10860
G1_000154	P26443
G1_000154	P39708
G1_000154	P49448
G1_000154	P54385
G1_000154	PBANKA_1014000
G1_000154	PBANKA_1026200
G1_000154	PF3D7_1416500
G1_000154	PF3D7_1430700
G1_000154	PKNH_1328000
G1_000154	PKNH_1341600
G1_000154	PVX_085005
G1_000154	PVX_085625
G1_000154	PY17X_1015500
G1_000154	PY17X_1028600
G1_000154	PcyM_1321700
G1_000154	PcyM_1337800
G1_000154	Q9VCN3
G1_000155	A0A0G2K4C1
G1_000155	A0A0G2K735
G1_000155	A0A0G2K8A5
G1_000155	A0AVT1
G1_000155	D4A8H3
G1_000155	P22314
G1_000155	P22515
G1_000155	P31254
G1_000155	P41226
G1_000155	PBANKA_1440700
G1_000155	PF3D7_1225800
G1_000155	PKNH_1445200
G1_000155	PVX_123920
G1_000155	PY17X_1443200
G1_000155	PcyM_1446700
G1_000155	Q02053
G1_000155	Q5U300
G1_000155	Q8C7R4
G1_000155	Q8T0L3
G1_000155	Q9DBK7
G1_000156	A0A0B4KEJ7
G1_000156	G3V624
G1_000156	O89046
G1_000156	O89053
G1_000156	P31146
G1_000156	PBANKA_1464100
G1_000156	PF3D7_1251200
G1_000156	PKNH_1471200
G1_000156	PVX_101450
G1_000156	PY17X_1466700
G1_000156	PcyM_1475300
G1_000156	Q06440
G1_000156	Q6QEF8
G1_000156	Q91ZN1
G1_000156	Q920J3
G1_000156	Q920M5
G1_000156	Q9BR76
G1_000156	Q9ULV4
G1_000156	Q9WUM3
G1_000156	Q9WUM4
G1_000158	P25294
G1_000158	P59910
G1_000158	PBANKA_0310000
G1_000158	PF3D7_0201800
G1_000158	PF3D7_0213100
G1_000158	PKNH_0407900
G1_000158	PKNH_1246700
G1_000158	PVX_002875
G1_000158	PVX_118690
G1_000158	PY17X_0310500
G1_000158	PcyM_0409800
G1_000158	PcyM_1280800
G1_000158	Q24133
G1_000158	Q5XIP0
G1_000158	Q5YKV6
G1_000158	Q80Y75
G1_000158	Q9D832
G1_000158	Q9UDY4
G1_000158	Q9VPY9
G1_000159	A2ATU0
G1_000159	A8JNU6
G1_000159	D3ZQD3
G1_000159	E9Q7L0
G1_000159	P20967
G1_000159	PBANKA_0710100
G1_000159	PF3D7_0820700
G1_000159	PKNH_1314700
G1_000159	PVX_089325
G1_000159	PY17X_0710300
G1_000159	PcyM_0513300
G1_000159	Q02218
G1_000159	Q4KLP0
G1_000159	Q5XI78
G1_000159	Q60597
G1_000159	Q95T35
G1_000159	Q96HY7
G1_000159	Q9ULD0
G1_000159	Q9VA02
G1_000160	A2A3N6
G1_000160	D3ZSI8
G1_000160	O14986
G1_000160	O60331
G1_000160	O70161
G1_000160	P38994
G1_000160	P70181
G1_000160	P70182
G1_000160	PBANKA_0203100
G1_000160	PF3D7_0110600
G1_000160	PKNH_0203300
G1_000160	PVX_081270
G1_000160	PY17X_0204500
G1_000160	PcyM_0206100
G1_000160	Q0E8Y1
G1_000160	Q5CZZ9
G1_000160	Q5I6B8
G1_000160	Q99755
G1_000160	Q9W2R3
G1_000161	A9UMV8
G1_000161	D3ZXP3
G1_000161	P02262
G1_000161	P04911
G1_000161	P04912
G1_000161	P0C169
G1_000161	P16104
G1_000161	P27661
G1_000161	P84051
G1_000161	PBANKA_1117000
G1_000161	PF3D7_0617800
G1_000161	PKNH_1132600
G1_000161	PVX_114015
G1_000161	PY17X_1118100
G1_000161	PcyM_1133000
G1_000161	Q4AB57
G1_000161	Q8R1M2
G1_000161	Q93077
G1_000161	Q9BTM1
G1_000162	M0R5V1
G1_000162	O75688
G1_000162	P20650
G1_000162	P34221
G1_000162	P35813
G1_000162	P35815
G1_000162	P36993
G1_000162	P49443
G1_000162	PBANKA_1318700
G1_000162	PF3D7_1455000
G1_000162	PKNH_1227100
G1_000162	PVX_117730
G1_000162	PY17X_1322500
G1_000162	PcyM_1260000
G1_000162	Q5SGD2
G1_000162	Q8BHN0
G1_000162	Q961C5
G1_000162	Q9VBF9
G1_000162	Q9XZ28
G1_000163	D3ZHE7
G1_000163	D3ZPV2
G1_000163	P23254
G1_000163	P29401
G1_000163	P33315
G1_000163	P40142
G1_000163	P50137
G1_000163	P51854
G1_000163	PBANKA_0109100
G1_000163	PF3D7_0610800
G1_000163	PKNH_1139600
G1_000163	PVX_113675
G1_000163	PY17X_0110700
G1_000163	PcyM_1140600
G1_000163	Q99MX0
G1_000163	Q9D4D4
G1_000163	Q9H0I9
G1_000163	Q9VHN7
G1_000163	Q9VVP4
G1_000164	PBANKA_0402800
G1_000164	PF3D7_0304200
G1_000164	PKNH_0838900
G1_000164	PVX_119335
G1_000164	PY17X_0405000
G1_000164	PcyM_0840100
G1_000164	Q4V8H8
G1_000164	Q641Z6
G1_000164	Q8BH64
G1_000164	Q8R3Z7
G1_000164	Q8R491
G1_000164	Q8T8W3
G1_000164	Q9EQP2
G1_000164	Q9H223
G1_000164	Q9H4M9
G1_000164	Q9NZN3
G1_000164	Q9NZN4
G1_000164	Q9QXY6
G1_000164	Q9WVK4
G1_000166	A0A0G2JSV3
G1_000166	G3UXL2
G1_000166	M0RBK1
G1_000166	P09330
G1_000166	P11908
G1_000166	P21108
G1_000166	P38063
G1_000166	P60891
G1_000166	P60892
G1_000166	PBANKA_1340300
G1_000166	PF3D7_1325100
G1_000166	PKNH_1203700
G1_000166	PVX_116620
G1_000166	PY17X_1345000
G1_000166	PcyM_1233900
G1_000166	Q8C5R8
G1_000166	Q9CS42
G1_000166	Q9D7G0
G1_000166	Q9VT33
G1_000172	P00338
G1_000172	P00342
G1_000172	P04642
G1_000172	P06151
G1_000172	P07195
G1_000172	P07864
G1_000172	P16125
G1_000172	P19629
G1_000172	P42123
G1_000172	PBANKA_1340100
G1_000172	PF3D7_1324900
G1_000172	PKNH_1203900
G1_000172	PVX_116630
G1_000172	PY17X_1344800
G1_000172	PcyM_1234100
G1_000172	Q6ZMR3
G1_000172	Q8BVP2
G1_000172	Q95028
G1_000172	Q9BYZ2
G1_000177	P00796
G1_000177	P00797
G1_000177	P06281
G1_000177	P07267
G1_000177	P07339
G1_000177	P08424
G1_000177	P18242
G1_000177	P24268
G1_000177	PBANKA_1034400
G1_000177	PF3D7_1407800
G1_000177	PF3D7_1407900
G1_000177	PF3D7_1408000
G1_000177	PF3D7_1408100
G1_000177	PKNH_1350300
G1_000177	PVX_086040
G1_000177	PY17X_1036800
G1_000177	PcyM_1348200
G1_000177	Q7K485
G1_000178	A6NDG6
G1_000178	D3ZDK7
G1_000178	P19881
G1_000178	P60487
G1_000178	PBANKA_1421300
G1_000178	PF3D7_0715000
G1_000178	PKNH_1424000
G1_000178	PVX_122960
G1_000178	PY17X_1423300
G1_000178	PcyM_1425200
G1_000178	Q8CHP8
G1_000178	Q8SXC0
G1_000178	Q8SXC9
G1_000178	Q8VD52
G1_000178	Q96GD0
G1_000178	Q9VVL5
G1_000178	Q9VZW4
G1_000178	Q9W272
G1_000179	A0A0G2K0G3
G1_000179	O89049
G1_000179	P91938
G1_000179	PBANKA_0824700
G1_000179	PF3D7_0923800.1
G1_000179	PF3D7_0923800.2
G1_000179	PKNH_0721800
G1_000179	PVX_099600
G1_000179	PY17X_0828000
G1_000179	PcyM_0722800
G1_000179	Q16881
G1_000179	Q86VQ6
G1_000179	Q99MD6
G1_000179	Q9JLT4
G1_000179	Q9JMH6
G1_000179	Q9NNW7
G1_000179	Q9VNT5
G1_000179	Q9Z0J5
G1_000182	O00139
G1_000182	P28740
G1_000182	PBANKA_1458300
G1_000182	PF3D7_1245100
G1_000182	PKNH_1464800
G1_000182	PVX_101150
G1_000182	PY17X_1460900
G1_000182	PcyM_1468500
G1_000182	Q5XI51
G1_000182	Q62909
G1_000182	Q8C0N1
G1_000182	Q8N4N8
G1_000182	Q922S8
G1_000182	Q960Z0
G1_000182	Q99661
G1_000182	Q9W1U1
G1_000182	Q9W1U4
G1_000182	Q9WV63
G1_000188	PVX_060690
G1_000188	PcyM_0004700
G1_000188	PcyM_0006900
G1_000188	PcyM_0008900
G1_000188	PcyM_0010400
G1_000188	PcyM_0021600
G1_000188	PcyM_0025700
G1_000188	PcyM_0029800
G1_000188	PcyM_0037600
G1_000188	PcyM_0052300
G1_000188	PcyM_0059600
G1_000188	PcyM_0068100
G1_000188	PcyM_0076500
G1_000188	PcyM_0078700
G1_000188	PcyM_0300300
G1_000188	PcyM_0629200
G1_000188	PcyM_1285200
G1_000188	PcyM_1286400
G1_000189	B1AVH7
G1_000189	B5DFA1
G1_000189	D3ZAF7
G1_000189	PBANKA_0933400.1
G1_000189	PBANKA_0933400.2
G1_000189	PF3D7_1114200
G1_000189	PKNH_0911800
G1_000189	PVX_091355
G1_000189	PY17X_0935400
G1_000189	PcyM_0916600
G1_000189	Q12317
G1_000189	Q3U0J8
G1_000189	Q4QQU7
G1_000189	Q5TC63
G1_000189	Q9BYX2
G1_000189	Q9D3N8
G1_000189	Q9UPU7
G1_000189	Q9VEY4
G1_000190	P04785
G1_000190	P07237
G1_000190	P08003
G1_000190	P09103
G1_000190	P11598
G1_000190	P13667
G1_000190	P17967
G1_000190	P27773
G1_000190	P30101
G1_000190	P38659
G1_000190	P54399
G1_000190	PBANKA_0702800
G1_000190	PF3D7_0827900
G1_000190	PKNH_1322000
G1_000190	PVX_088960
G1_000190	PY17X_0703100
G1_000190	PcyM_0505300
G1_000190	Q3YMU0
G1_000191	P20108
G1_000191	P30048
G1_000191	P32119
G1_000191	P34760
G1_000191	P35700
G1_000191	P35704
G1_000191	PBANKA_1302800
G1_000191	PF3D7_1438900
G1_000191	PKNH_1243400
G1_000191	PVX_118545
G1_000191	PY17X_1306600
G1_000191	PcyM_1277200
G1_000191	Q06830
G1_000191	Q61171
G1_000191	Q63716
G1_000191	Q9V3P0
G1_000191	Q9VEJ0
G1_000191	Q9Z0V6
G1_000192	O00429
G1_000192	O35303
G1_000192	P21576
G1_000192	P54861
G1_000192	PBANKA_0520400
G1_000192	PBANKA_0903600
G1_000192	PF3D7_1037500
G1_000192	PF3D7_1145400
G1_000192	PKNH_0622000
G1_000192	PKNH_0943300
G1_000192	PVX_092875
G1_000192	PVX_110885
G1_000192	PY17X_0521500
G1_000192	PY17X_0905000
G1_000192	PcyM_0626900
G1_000192	PcyM_0950500
G1_000192	Q8K1M6
G1_000192	Q9VQE0
G1_000193	A0A0G2K612
G1_000193	A2A5Z6
G1_000193	F1M3F2
G1_000193	P51593
G1_000193	PBANKA_0704500
G1_000193	PF3D7_0826100
G1_000193	PKNH_1320300
G1_000193	PVX_089055
G1_000193	PY17X_0704800
G1_000193	PcyM_0507300
G1_000193	Q03280
G1_000193	Q7TMY8
G1_000193	Q7Z6Z7
G1_000193	Q9CUN6
G1_000193	Q9HAU4
G1_000193	Q9HCE7
G1_000193	Q9V853
G1_000193	X2JF73
G1_000194	P20081
G1_000194	P26883
G1_000194	P30416
G1_000194	P48375
G1_000194	P62942
G1_000194	PBANKA_1460400
G1_000194	PF3D7_1247400
G1_000194	PKNH_1467100
G1_000194	PVX_101260
G1_000194	PY17X_1463000
G1_000194	PcyM_1471000
G1_000194	Q02790
G1_000194	Q13451
G1_000194	Q5U2T9
G1_000194	Q62658
G1_000194	Q64378
G1_000194	Q9QVC8
G1_000194	Q9VL78
G1_000195	A0A0G2JXE0
G1_000195	G3V8B3
G1_000195	P02283
G1_000195	P02293
G1_000195	P10853
G1_000195	P33778
G1_000195	P62807
G1_000195	PBANKA_1420600
G1_000195	PF3D7_0714000
G1_000195	PKNH_1422900
G1_000195	PVX_122930
G1_000195	PY17X_1422300
G1_000195	PcyM_1424200
G1_000195	Q16778
[truncated: 33,544 more rows]
