# Supplementary material for: A comparative transcriptomic analysis of replicating and dormant liver stages of the relapsing malaria parasite Plasmodium cynomolgi
Source: eLife. 2017 Dec 7;6:e29605. doi: 10.7554/eLife.29605 (PMC5758109; doi:10.7554/eLife.29605)
Supplement: Supplementary file 7. [file elife-29605-supp7.xlsx]

## Sheet: Supplementary_Table_7
Supplementary File 7: P. cynomolgi proteins linked to malaria pathways mapped from PlasmoDB, related to Figure 3
Pathway	Protein
Pre-ribosomal particles along the 40S assembly pathway	PcyM_1263400
Pre-ribosomal particles along the 40S assembly pathway	PcyM_1453400
Pre-ribosomal particles along the 40S assembly pathway	PcyM_0715900
Pre-ribosomal particles along the 40S assembly pathway	PcyM_1448200
Pre-ribosomal particles along the 40S assembly pathway	PcyM_1335400
Pre-ribosomal particles along the 40S assembly pathway	PcyM_1224900
Pre-ribosomal particles along the 40S assembly pathway	PcyM_0205700
Pre-ribosomal particles along the 40S assembly pathway	PcyM_1107000
Pre-ribosomal particles along the 40S assembly pathway	PcyM_1454200
Pre-ribosomal particles along the 40S assembly pathway	PcyM_1454200
Pre-ribosomal particles along the 40S assembly pathway	PcyM_1107000
Pre-ribosomal particles along the 40S assembly pathway	PcyM_0618800
Pre-ribosomal particles along the 40S assembly pathway	PcyM_0715900
Pre-ribosomal particles along the 40S assembly pathway	PcyM_0618800
Pre-ribosomal particles along the 40S assembly pathway	PcyM_1454200
Pre-ribosomal particles along the 40S assembly pathway	PcyM_1107000
Pre-ribosomal particles along the 40S assembly pathway	PcyM_0715900
Pre-ribosomal particles along the 40S assembly pathway	PcyM_1118900
Pre-ribosomal particles along the 40S assembly pathway	PcyM_0618800
Pre-ribosomal particles along the 40S assembly pathway	PcyM_0941500
Pre-ribosomal particles along the 40S assembly pathway	PcyM_0530200
Pre-ribosomal particles along the 40S assembly pathway	PcyM_0608500
Pre-ribosomal particles along the 40S assembly pathway	PcyM_1404100
Pre-ribosomal particles along the 60S assembly pathway	PcyM_1350200
Pre-ribosomal particles along the 60S assembly pathway	PcyM_0506400
Pre-ribosomal particles along the 60S assembly pathway	PcyM_1454200
Pre-ribosomal particles along the 60S assembly pathway	PcyM_1138300
Pre-ribosomal particles along the 60S assembly pathway	PcyM_1319600
Pre-ribosomal particles along the 60S assembly pathway	PcyM_0618800
Pre-ribosomal particles along the 60S assembly pathway	PcyM_1119400
Pre-ribosomal particles along the 60S assembly pathway	PcyM_1330800
Pre-ribosomal particles along the 60S assembly pathway	PcyM_0218500
Pre-ribosomal particles along the 60S assembly pathway	PcyM_1131200
Pre-ribosomal particles along the 60S assembly pathway	PcyM_0715900
Pre-ribosomal particles along the 60S assembly pathway	PcyM_0927200
Pre-ribosomal particles along the 60S assembly pathway	PcyM_1319500
Pre-ribosomal particles along the 60S assembly pathway	PcyM_1335400
Pre-ribosomal particles along the 60S assembly pathway	PcyM_1408800
Pre-ribosomal particles along the 60S assembly pathway	PcyM_1475600
Pre-ribosomal particles along the 60S assembly pathway	PcyM_1118900
Pre-ribosomal particles along the 60S assembly pathway	PcyM_1243200
Pre-ribosomal particles along the 60S assembly pathway	PcyM_0112500
Pre-ribosomal particles along the 60S assembly pathway	PcyM_0909500
Proteasome-mediated degradation of non-native ER proteins	PcyM_0112500
Pre-ribosomal particles along the 60S assembly pathway	PcyM_1427200
Pre-ribosomal particles along the 60S assembly pathway	PcyM_1107000
Pre-ribosomal particles along the 60S assembly pathway	PcyM_1118900
Pre-ribosomal particles along the 60S assembly pathway	PcyM_1007300
Pre-ribosomal particles along the 60S assembly pathway	PcyM_1321000
Pre-ribosomal particles along the 60S assembly pathway	PcyM_1216600
The ubiquitylation machineries of the ER for misfolded secretory proteins	PcyM_1427200
Pre-ribosomal particles along the 60S assembly pathway	PcyM_1118900
The ubiquitylation machineries of the ER for misfolded secretory proteins	PcyM_0112500
Proteasome-mediated degradation of non-native ER proteins	PcyM_1427200
Pre-ribosomal particles along the 60S assembly pathway	PcyM_1448200
The ATG autophagic pathway	PcyM_0510700
The ATG autophagic pathway	PcyM_1219600
The ATG autophagic pathway	PcyM_0831600
The ATG autophagic pathway	PcyM_0404500
The ATG autophagic pathway	PcyM_1320700
The ATG autophagic pathway	PcyM_1242000
The ATG autophagic pathway	PcyM_1320700
The ATG autophagic pathway	PcyM_0510900
The ATG autophagic pathway	PcyM_1464000
Phosphoproteome -Collins et al 2014	PcyM_0110700
The ATG autophagic pathway	PcyM_0605900
The ATG autophagic pathway	PcyM_1017300
The ATG autophagic pathway	PcyM_1017300
The ATG autophagic pathway	PcyM_1429000
The ATG autophagic pathway	PcyM_0110700
The ATG autophagic pathway	PcyM_0405400
ATP synthase complex	PcyM_0944800
ATP synthase complex	PcyM_1425700
ATP synthase complex	PcyM_0952900
ATP synthase complex	PcyM_1214900
ATP synthase complex	PcyM_0115100
ATP synthase complex	PcyM_0211500
ATP synthase complex	PcyM_0736400
ATP synthase complex	PcyM_0106500
ATP synthase complex	PcyM_1413600
ATP synthase complex	PcyM_1310400
ATP synthase complex	PcyM_1408100
ATP synthase complex	PcyM_0308400
ATP synthase complex	PcyM_1012800
ATP synthase complex	PcyM_1413000
ATP synthase complex	PcyM_1236200
ATP synthase complex	PcyM_0405000
ATP synthase complex	PcyM_1117700
ATP synthase complex	PcyM_1411600
ATP synthase complex	PcyM_1459000
ATP synthase complex	PcyM_1248100
The Atg8 and Atg12 ubiquitin-like conjugation systems	PcyM_0510900
The Atg8 and Atg12 ubiquitin-like conjugation systems	PcyM_0605900
The Atg8 and Atg12 ubiquitin-like conjugation systems	PcyM_1242000
The Atg8 and Atg12 ubiquitin-like conjugation systems	PcyM_0703400
The Atg8 and Atg12 ubiquitin-like conjugation systems	PcyM_0703400
Biogenesis of cytochrome oxidase	PcyM_0944500
Biogenesis of cytochrome oxidase	PcyM_1316600
Nuclear proteome	PcyM_1109500
Phosphoproteome -Collins et al 2014	PcyM_1109500
A model for global single-strand break (SSB) repair	PcyM_1109500
Biogenesis of cytochrome oxidase	PcyM_1301600
Biogenesis of cytochrome oxidase	PcyM_0507800
Biogenesis of cytochrome oxidase	PcyM_MT00600
Biogenesis of cytochrome oxidase	PcyM_1321500
Mitochondrial disulfide relay system	PcyM_1109700
Biogenesis of cytochrome oxidase	PcyM_0320700
Biogenesis of cytochrome oxidase	PcyM_1109700
Biogenesis of cytochrome oxidase	PcyM_1434900
Biogenesis of cytochrome oxidase	PcyM_0727800
Biogenesis of cytochrome oxidase	PcyM_0504800
Biogenesis of cytochrome oxidase	PcyM_1279700
Biogenesis of cytochrome oxidase	PcyM_1012600
Biogenesis of cytochrome oxidase	PcyM_0110000
Biogenesis of cytochrome oxidase	PcyM_0109800
Mitochondrial disulfide relay system	PcyM_0727800
Biogenesis of cytochrome oxidase	PcyM_0727800
Biogenesis of cytochrome oxidase	PcyM_0613700
Biogenesis of cytochrome oxidase	PcyM_1419800
Biogenesis of cytochrome oxidase	PcyM_0702600
Biosynthesis of Fe-S proteins in the apicoplast	PcyM_0526300
Biosynthesis of Fe-S proteins in the apicoplast	PcyM_0509900
Biosynthesis of Fe-S proteins in the apicoplast	PcyM_1419800
Biosynthesis of Fe-S proteins in the apicoplast	PcyM_0418800
Biosynthesis of Fe-S proteins in the apicoplast	PcyM_1341500
Biosynthesis of Fe-S proteins in the apicoplast	PcyM_API00100
Biosynthesis of Fe-S proteins in the apicoplast	PcyM_0509900
Biosynthesis of Fe-S proteins in the apicoplast	PcyM_0720200
Biosynthesis of Fe-S proteins in the apicoplast	PcyM_0315900
Biosynthesis of Fe-S proteins in the apicoplast	PcyM_0315900
Biosynthesis of Fe-S proteins in the apicoplast	PcyM_0216400
Biosynthesis of Fe-S proteins in the apicoplast	PcyM_0320700
Biosynthesis of Fe-S proteins in the apicoplast	PcyM_0610100
Biosynthesis of Fe-S proteins in the apicoplast	PcyM_0944500
Biosynthesis of Fe-S proteins in the apicoplast	PcyM_1127100
Biosynthesis of Fe-S proteins in the apicoplast	PcyM_0841800
Biosynthesis of Fe-S proteins in the apicoplast	PcyM_1009100
CCR4 NOT complex	PcyM_0820900
CCR4 NOT complex	PcyM_1430300
CCR4 NOT complex	PcyM_0623400
CCR4 NOT complex	PcyM_0209800
CCR4 NOT complex	PcyM_0510300
CCR4 NOT complex	PcyM_1317600
CCR4 NOT complex	PcyM_1012400
CCR4 NOT complex	PcyM_0815300
CCR4 NOT complex	PcyM_1026400
CCR4 NOT complex	PcyM_0822700
CCR4 NOT complex	PcyM_1272300
Model of the Ube2w/CHIP/Ataxin-3 Ubiquitination Cycle	PcyM_1015800
Model of the Ube2w/CHIP/Ataxin-3 Ubiquitination Cycle	PcyM_1105400
Model of the Ube2w/CHIP/Ataxin-3 Ubiquitination Cycle	PcyM_1342200
Model of the Ube2w/CHIP/Ataxin-3 Ubiquitination Cycle	PcyM_1442300
Phosphoproteome -Collins et al 2014	PcyM_0108600
Model of the Ube2w/CHIP/Ataxin-3 Ubiquitination Cycle	PcyM_1271900
Model of the Ube2w/CHIP/Ataxin-3 Ubiquitination Cycle	PcyM_0919700
Proteasome-mediated degradation of non-native ER proteins	PcyM_1447800
Model of the Ube2w/CHIP/Ataxin-3 Ubiquitination Cycle	PcyM_1461900
The ubiquitylation machineries of the ER for misfolded secretory proteins	PcyM_1461900
Model of the Ube2w/CHIP/Ataxin-3 Ubiquitination Cycle	PcyM_0109400
Model of the Ube2w/CHIP/Ataxin-3 Ubiquitination Cycle	PcyM_1004300
Model of the Ube2w/CHIP/Ataxin-3 Ubiquitination Cycle	PcyM_0109400
Model of the Ube2w/CHIP/Ataxin-3 Ubiquitination Cycle	PcyM_1442300
Nuclear proteome	PcyM_0108600
Model of the Ube2w/CHIP/Ataxin-3 Ubiquitination Cycle	PcyM_0520700
Model of the Ube2w/CHIP/Ataxin-3 Ubiquitination Cycle	PcyM_1447800
Model of the Ube2w/CHIP/Ataxin-3 Ubiquitination Cycle	PcyM_0521800
Model of the Ube2w/CHIP/Ataxin-3 Ubiquitination Cycle	PcyM_1416500
Model of the Ube2w/CHIP/Ataxin-3 Ubiquitination Cycle	PcyM_1252900
Nuclear proteome	PcyM_1448200
Model of the Ube2w/CHIP/Ataxin-3 Ubiquitination Cycle	PcyM_0108600
Model of the Ube2w/CHIP/Ataxin-3 Ubiquitination Cycle	PcyM_1418700
Model of the Ube2w/CHIP/Ataxin-3 Ubiquitination Cycle	PcyM_1115400
Classical COPI-mediated vesicular transport	PcyM_1404700
Classical COPI-mediated vesicular transport	PcyM_1416200
Classical COPI-mediated vesicular transport	PcyM_1004700
Classical COPI-mediated vesicular transport	PcyM_1466300
Myristoylated proteins	PcyM_0719200
Classical COPI-mediated vesicular transport	PcyM_1467900
Classical COPI-mediated vesicular transport	PcyM_0607300
Classical COPI-mediated vesicular transport	PcyM_1224200
ADP ribosylation factors functions in the secretory pathway	PcyM_0719200
Phosphoproteome -Collins et al 2014	PcyM_1272900
Classical COPI-mediated vesicular transport	PcyM_1273900
Classical COPI-mediated vesicular transport	PcyM_1462200
Classical COPI-mediated vesicular transport	PcyM_1322600
Classical COPI-mediated vesicular transport	PcyM_0708900
Nuclear proteome	PcyM_0703700
Classical COPI-mediated vesicular transport	PcyM_0950200
Classical COPI-mediated vesicular transport	PcyM_0703700
Classical COPI-mediated vesicular transport	PcyM_0719200
Classical COPI-mediated vesicular transport	PcyM_1234300
Classical COPI-mediated vesicular transport	PcyM_0523500
Classical COPI-mediated vesicular transport	PcyM_0939700
Classical COPI-mediated vesicular transport	PcyM_0117700
Classical COPI-mediated vesicular transport	PcyM_0526400
Classical COPI-mediated vesicular transport	PcyM_0624600
Classical COPI-mediated vesicular transport	PcyM_0828200
Classical COPI-mediated vesicular transport	PcyM_1145400
Single Gene/enzyme deletions predicted to cause impairment of metabolic network	PcyM_0719200
Classical COPI-mediated vesicular transport	PcyM_1111800
Classical COPI-mediated vesicular transport	PcyM_1417900
Classical COPI-mediated vesicular transport	PcyM_1266800
Classical COPI-mediated vesicular transport	PcyM_0531600
Classical COPI-mediated vesicular transport	PcyM_0811500
Phosphoproteome -Collins et al 2014	PcyM_1322500
Phosphoproteome -Collins et al 2014	PcyM_1322600
Single Gene/enzyme deletions predicted to cause impairment of metabolic network	PcyM_0719500
Classical COPI-mediated vesicular transport	PcyM_0113000
Classical COPII-mediated vesicular transport	PcyM_0624600
Classical COPII-mediated vesicular transport	PcyM_1234300
Classical COPII-mediated vesicular transport	PcyM_0607300
Classical COPII-mediated vesicular transport	PcyM_1004700
Classical COPII-mediated vesicular transport	PcyM_1224200
Classical COPII-mediated vesicular transport	PcyM_0307200
Classical COPII-mediated vesicular transport	PcyM_0526400
Classical COPII-mediated vesicular transport	PcyM_0708900
Classical COPII-mediated vesicular transport	PcyM_1417900
Classical COPII-mediated vesicular transport	PcyM_0531600
Classical COPII-mediated vesicular transport	PcyM_1416200
Classical COPII-mediated vesicular transport	PcyM_1273900
Classical COPII-mediated vesicular transport	PcyM_0828200
Classical COPII-mediated vesicular transport	PcyM_0511100
Classical COPII-mediated vesicular transport	PcyM_1111800
Classical COPII-mediated vesicular transport	PcyM_1467900
Classical COPII-mediated vesicular transport	PcyM_1110400
Classical COPII-mediated vesicular transport	PcyM_0918900
Classical COPII-mediated vesicular transport	PcyM_0811500
Classical COPII-mediated vesicular transport	PcyM_0719200
Classical COPII-mediated vesicular transport	PcyM_1266800
Classical COPII-mediated vesicular transport	PcyM_1404700
Classical COPII-mediated vesicular transport	PcyM_0408500
Classical COPII-mediated vesicular transport	PcyM_1465300
Nuclear proteome	PcyM_0701400
Centriole proteins	PcyM_0532100
Centriole proteins	PcyM_1269200
Centriole proteins	PcyM_0616100
Centriole proteins	PcyM_0532100
Centriole proteins	PcyM_0701400
Nuclear proteome	PcyM_0532200
Centriole proteins	PcyM_0701400
Nuclear proteome	PcyM_0532100
Centriole proteins	PcyM_0103200
Effect of different motors on spindle length	PcyM_0532100
Centriole proteins	PcyM_0808300
Centriole proteins	PcyM_1114800
Centriole proteins	PcyM_1205800
Effect of different motors on spindle length	PcyM_0701400
Centriole proteins	PcyM_0118700
Centriole proteins	PcyM_0943700
Centriole proteins	PcyM_1217100
Centriole proteins	PcyM_0907300
Centriole proteins	PcyM_1449700
Nuclear proteome	PcyM_1449700
Centriole proteins	PcyM_1280100
Centriole proteins	PcyM_1104200
Centriole proteins	PcyM_1144400
DNA binding proteins with AP2 domain(s)	PcyM_1246400
DNA binding proteins with AP2 domain(s)	PcyM_1406700
DNA binding proteins with AP2 domain(s)	PcyM_0219500
Model for translesion DNA synthesis	PcyM_1428800
Model for translesion DNA synthesis	PcyM_0520700
Model for translesion DNA synthesis	PcyM_0812400
Model for translesion DNA synthesis	PcyM_0602300
Model for translesion DNA synthesis	PcyM_0836100
Model for translesion DNA synthesis	PcyM_0404000
Model for translesion DNA synthesis	PcyM_1119600
A model for global single-strand break (SSB) repair	PcyM_0836100
Nuclear proteome	PcyM_0404000
Nuclear proteome	PcyM_0835900
Phosphoproteome -Collins et al 2014	PcyM_0835900
Model for translesion DNA synthesis	PcyM_1105400
Model for translesion DNA synthesis	PcyM_0312200
Model for translesion DNA synthesis	PcyM_1461900
Model for translesion DNA synthesis	PcyM_0702500
Model for translesion DNA synthesis	PcyM_1109500
A model for global single-strand break (SSB) repair	PcyM_0404000
Nuclear proteome	PcyM_1465000
Genes coding for enzymes/proteins involved in DNA replication	PcyM_1318100
Genes coding for enzymes/proteins involved in DNA replication	PcyM_0205300
Genes coding for enzymes/proteins involved in DNA replication	PcyM_1209300
Genes coding for enzymes/proteins involved in DNA replication	PcyM_1114100
Genes coding for enzymes/proteins involved in DNA replication	PcyM_1126300
Genes coding for enzymes/proteins involved in DNA replication	PcyM_0709200
Genes coding for enzymes/proteins involved in DNA replication	PcyM_1245700
Genes coding for enzymes/proteins involved in DNA replication	PcyM_0920300
Genes coding for enzymes/proteins involved in DNA replication	PcyM_1024700
Genes coding for enzymes/proteins involved in DNA replication	PcyM_1322500
Genes coding for enzymes/proteins involved in DNA replication	PcyM_1474900
Genes coding for enzymes/proteins involved in DNA replication	PcyM_1028600
Genes coding for enzymes/proteins involved in DNA replication	PcyM_1405600
Crosstalk between ubiquitination and SUMOylation	PcyM_0708800
Genes coding for enzymes/proteins involved in DNA replication	PcyM_0708800
Genes coding for enzymes/proteins involved in DNA replication	PcyM_1147400
Genes coding for enzymes/proteins involved in DNA replication	PcyM_0705900
Genes coding for enzymes/proteins involved in DNA replication	PcyM_0702500
Genes coding for enzymes/proteins involved in DNA replication	PcyM_1465000
Nuclear proteome	PcyM_0726700
Genes coding for enzymes/proteins involved in DNA replication	PcyM_0726700
Genes coding for enzymes/proteins involved in DNA replication	PcyM_0314600
Genes coding for enzymes/proteins involved in DNA replication	PcyM_0314500
Genes coding for enzymes/proteins involved in DNA replication	PcyM_0312200
Genes coding for enzymes/proteins involved in DNA replication	PcyM_1019200
Genes coding for enzymes/proteins involved in DNA replication	PcyM_1432000
Genes coding for enzymes/proteins involved in DNA replication	PcyM_1022800
Genes coding for enzymes/proteins involved in DNA replication	PcyM_1437400
Genes coding for enzymes/proteins involved in DNA replication	PcyM_0812000
Genes coding for enzymes/proteins involved in DNA replication	PcyM_0736000
Genes coding for enzymes/proteins involved in DNA replication	PcyM_1277400
Genes coding for enzymes/proteins involved in DNA replication	PcyM_1312200
A model for global single-strand break (SSB) repair	PcyM_1465000
Proteins targeted by the thioredoxin superfamily enzymes	PcyM_1277200
Genes coding for enzymes/proteins involved in DNA replication	PcyM_0836100
Genes coding for enzymes/proteins involved in DNA replication	PcyM_1102400
Genes coding for enzymes/proteins involved in DNA replication	PcyM_0913200
A model for global single-strand break (SSB) repair	PcyM_0913200
Nuclear proteome	PcyM_0913200
Genes coding for enzymes/proteins involved in DNA replication	PcyM_0715400
Genes coding for enzymes/proteins involved in DNA replication	PcyM_0838600
A model for global single-strand break (SSB) repair	PcyM_0402500
Genes coding for enzymes/proteins involved in DNA replication	PcyM_0215400
Genes coding for enzymes/proteins involved in DNA replication	PcyM_1249600
Genes coding for enzymes/proteins involved in DNA replication	PcyM_0107600
Genes coding for enzymes/proteins involved in DNA replication	PcyM_1325300
Genes coding for enzymes/proteins involved in DNA replication	PcyM_0402500
Subcellular location of exported proteins	PcyM_0525300
Genes coding for enzymes/proteins involved in DNA replication	PcyM_1347900
Genes coding for enzymes/proteins involved in DNA replication	PcyM_0908500
Genes coding for enzymes/proteins involved in DNA replication	PcyM_0716900
Genes coding for enzymes/proteins involved in DNA replication	PcyM_0907800
Phosphoproteome -Collins et al 2014	PcyM_0402500
Nuclear proteome	PcyM_0402500
Genes coding for enzymes/proteins involved in DNA replication	PcyM_1119600
Genes coding for enzymes/proteins involved in DNA replication	PcyM_1327800
Genes coding for enzymes/proteins involved in DNA replication	PcyM_0404000
Genes coding for enzymes/proteins involved in DNA replication	PcyM_1109200
Nuclear proteome	PcyM_0602300
Genes coding for enzymes/proteins involved in DNA replication	PcyM_0713000
Crosstalk between ubiquitination and SUMOylation	PcyM_0402500
Genes coding for enzymes/proteins involved in DNA replication	PcyM_0602300
A model for global single-strand break (SSB) repair	PcyM_0602300
Genes coding for enzymes/proteins involved in DNA replication	PcyM_1339800
Phosphoproteome -Collins et al 2014	PcyM_1339800
Genes coding for enzymes/proteins involved in DNA replication	PcyM_1249500
Nuclear proteome	PcyM_1339800
DNA mismatch repair system	PcyM_1465000
DNA mismatch repair system	PcyM_1028600
DNA mismatch repair system	PcyM_1350600
DNA mismatch repair system	PcyM_1447500
DNA mismatch repair system	PcyM_1109500
DNA mismatch repair system	PcyM_0314500
DNA mismatch repair system	PcyM_0836100
DNA mismatch repair system	PcyM_1119600
DNA mismatch repair system	PcyM_1321800
DNA mismatch repair system	PcyM_0920300
Single Gene/enzyme deletions predicted to cause impairment of metabolic network	PcyM_1108900
DNA mismatch repair system	PcyM_1108900
DNA mismatch repair system	PcyM_0314600
DNA mismatch repair system	PcyM_0602300
DNA mismatch repair system	PcyM_0215400
DNA mismatch repair system	PcyM_0107600
DNA mismatch repair system	PcyM_0312200
DNA mismatch repair system	PcyM_0107600
DNA mismatch repair system	PcyM_1325300
DNA mismatch repair system	PcyM_1273800
A model for global single-strand break (SSB) repair	PcyM_1108200
DNA mismatch repair system	PcyM_1325300
DNA mismatch repair system	PcyM_0509400
DNA mismatch repair system	PcyM_0211700
DNA mismatch repair system	PcyM_0702500
DNA mismatch repair system	PcyM_1249500
DNA mismatch repair system	PcyM_0420000
DNA mismatch repair system	PcyM_0420200
Proteins of detergent-resistant membranes	PcyM_0609600
Proteins of detergent-resistant membranes	PcyM_0825400
Proteins of detergent-resistant membranes	PcyM_0321500
Proteins of detergent-resistant membranes	PcyM_1133400
Proteins of detergent-resistant membranes	PcyM_0933900
Proteins of detergent-resistant membranes	PcyM_0703100
Proteins of detergent-resistant membranes	PcyM_1133600
Single Gene/enzyme deletions predicted to cause impairment of metabolic network	PcyM_0937700
Proteins of detergent-resistant membranes	PcyM_0735400
Proteins of detergent-resistant membranes	PcyM_1012800
Proteins of detergent-resistant membranes	PcyM_0515400
Proteins of detergent-resistant membranes	PcyM_0934700
Proteins of detergent-resistant membranes	PcyM_1276700
Proteins of detergent-resistant membranes	PcyM_0716200
Proteins of detergent-resistant membranes	PcyM_1454800
Proteins of detergent-resistant membranes	PcyM_0934400
Proteins of detergent-resistant membranes	PcyM_0515400
Proteins of detergent-resistant membranes	PcyM_0815400
Proteins of detergent-resistant membranes	PcyM_0716200
Proteins of detergent-resistant membranes	PcyM_1248100
Proteins of detergent-resistant membranes	PcyM_0729600
Proteins of detergent-resistant membranes	PcyM_0417400
Proteins of detergent-resistant membranes	PcyM_0730000
Proteins of detergent-resistant membranes	PcyM_1246900
Proteins of detergent-resistant membranes	PcyM_0919300
Proteins of detergent-resistant membranes	PcyM_0701400
Proteins of detergent-resistant membranes	PcyM_0834100
Proteins of detergent-resistant membranes	PcyM_0937700
Proteins of detergent-resistant membranes	PcyM_0924700
Proteins of detergent-resistant membranes	PcyM_1016500
Proteins of detergent-resistant membranes	PcyM_0731200
Proteins of detergent-resistant membranes	PcyM_1114700
Proteins of detergent-resistant membranes	PcyM_1114600
Proteins of detergent-resistant membranes	PcyM_1321500
Proteins of detergent-resistant membranes	PcyM_1114600
Proteins of detergent-resistant membranes	PcyM_1129300
Proteins of detergent-resistant membranes	PcyM_0938800
Proteins of detergent-resistant membranes	PcyM_0532100
Proteins of detergent-resistant membranes	PcyM_1461800
Proteins of detergent-resistant membranes	PcyM_1256600
Phosphoproteome -Collins et al 2014	PcyM_1208900
Proteins of detergent-resistant membranes	PcyM_1223000
Proteins of detergent-resistant membranes	PcyM_0416200
Proteins of detergent-resistant membranes	PcyM_1442700
Proteins of detergent-resistant membranes	PcyM_0416300
Proteins of detergent-resistant membranes	PcyM_0416500
Proteins of detergent-resistant membranes	PcyM_0416600
Proteins of detergent-resistant membranes	PcyM_0416700
Proteins of detergent-resistant membranes	PcyM_0417100
Proteins of detergent-resistant membranes	PcyM_0416000
Proteins of detergent-resistant membranes	PcyM_0417200
Proteins of detergent-resistant membranes	PcyM_0308400
Proteins of detergent-resistant membranes	PcyM_0417300
Proteins of detergent-resistant membranes	PcyM_0308500
Proteins of detergent-resistant membranes	PcyM_0808300
Proteins of detergent-resistant membranes	PcyM_0716200
Proteins of detergent-resistant membranes	PcyM_0938800
Proteins of detergent-resistant membranes	PcyM_0417400
Mitochondrial disulfide relay system	PcyM_1321500
Proteins of detergent-resistant membranes	PcyM_0515400
Proteins of detergent-resistant membranes	PcyM_0115000
Proteins of detergent-resistant membranes	PcyM_0307000
Proteins of detergent-resistant membranes	PcyM_1218900
Proteins of detergent-resistant membranes	PcyM_1209200
Phosphoproteome -Collins et al 2014	PcyM_1209200
Proteins of detergent-resistant membranes	PcyM_1235600
Proteins of detergent-resistant membranes	PcyM_0938800
Proteins of detergent-resistant membranes	PcyM_1333200
Proteins of detergent-resistant membranes	PcyM_0604900
Proteins of detergent-resistant membranes	PcyM_1332600
Proteins of detergent-resistant membranes	PcyM_1138500
Proteins of detergent-resistant membranes	PcyM_1220200
Proteins of detergent-resistant membranes	PcyM_0115100
Proteins of detergent-resistant membranes	PcyM_1233900
Proteins of detergent-resistant membranes	PcyM_0716300
Proteins of detergent-resistant membranes	PcyM_0818300
Proteins of detergent-resistant membranes	PcyM_1008800
Proteins of detergent-resistant membranes	PcyM_1214800
Proteins of detergent-resistant membranes	PcyM_1008700
Proteins of detergent-resistant membranes	PcyM_1312700
Proteins of detergent-resistant membranes	PcyM_1312800
Proteins of detergent-resistant membranes	PcyM_1211700
Proteins of detergent-resistant membranes	PcyM_0532200
Proteins of detergent-resistant membranes	PcyM_1114700
Proteins of detergent-resistant membranes	PcyM_0517200
Proteins of detergent-resistant membranes	PcyM_0737900
Phosphoproteome -Collins et al 2014	PcyM_1025900
Proteins of detergent-resistant membranes	PcyM_1025900
Proteins of detergent-resistant membranes	PcyM_0417300
Proteins of detergent-resistant membranes	PcyM_0102700
Proteins of detergent-resistant membranes	PcyM_0420100
Proteins of detergent-resistant membranes	PcyM_1402000
Nuclear proteome	PcyM_1025700
Proteins of detergent-resistant membranes	PcyM_1107300
Proteins of detergent-resistant membranes	PcyM_1430400
Proteins of detergent-resistant membranes	PcyM_1469700
Proteins of detergent-resistant membranes	PcyM_0950500
Proteins of detergent-resistant membranes	PcyM_1034100
Proteins of detergent-resistant membranes	PcyM_1469700
Proteins of detergent-resistant membranes	PcyM_1472200
Proteins of detergent-resistant membranes	PcyM_0626900
Proteins of detergent-resistant membranes	PcyM_1105400
Myristoylated proteins	PcyM_1105400
Proteins of detergent-resistant membranes	PcyM_0417800
Proteins of detergent-resistant membranes	PcyM_0907200
Proteins of detergent-resistant membranes	PcyM_0906800
Proteins of detergent-resistant membranes	PcyM_1404200
Proteins of detergent-resistant membranes	PcyM_0214900
Phosphoproteome -Collins et al 2014	PcyM_0214900
Proteins of detergent-resistant membranes	PcyM_1268800
Proteins of detergent-resistant membranes	PcyM_1251500
Proteins of detergent-resistant membranes	PcyM_0737900
Proteins of detergent-resistant membranes	PcyM_1476200
Proteins of detergent-resistant membranes	PcyM_1406100
Proteins of detergent-resistant membranes	PcyM_1250100
Proteins of detergent-resistant membranes	PcyM_1267900
Proteins of detergent-resistant membranes	PcyM_1268100
Proteins of detergent-resistant membranes	PcyM_1402000
Proteins of detergent-resistant membranes	PcyM_1034100
Proteins of detergent-resistant membranes	PcyM_1240800
Proteins of detergent-resistant membranes	PcyM_0416500
Proteins of detergent-resistant membranes	PcyM_0416200
Proteins of detergent-resistant membranes	PcyM_1413600
Proteins of detergent-resistant membranes	PcyM_0417200
Proteins of detergent-resistant membranes	PcyM_0417100
Proteins of detergent-resistant membranes	PcyM_1345100
Proteins of detergent-resistant membranes	PcyM_0712900
Proteins of detergent-resistant membranes	PcyM_0416300
Proteins of detergent-resistant membranes	PcyM_0626700
Proteins of detergent-resistant membranes	PcyM_0416700
Proteins of detergent-resistant membranes	PcyM_0416600
Proteins of detergent-resistant membranes	PcyM_1243500
Proteins of detergent-resistant membranes	PcyM_1255400
Proteins of detergent-resistant membranes	PcyM_0416000
Proteins of detergent-resistant membranes	PcyM_1034300
Domains of merozoite surface proteins	PcyM_1476400
Domains of merozoite surface proteins	PcyM_0604200
Domains of merozoite surface proteins	PcyM_0938200
Domains of merozoite surface proteins	PcyM_0424000
Domains of merozoite surface proteins	PcyM_0826900
Domains of merozoite surface proteins	PcyM_1438300
Domains of merozoite surface proteins	PcyM_1221400
Domains of merozoite surface proteins	PcyM_0953000
Domains of merozoite surface proteins	PcyM_0535100
Transporters of the ER/Golgi and digestive vacuole membranes	PcyM_0944800
Transporters of the ER/Golgi and digestive vacuole membranes	PcyM_1267900
Transporters of the ER/Golgi and digestive vacuole membranes	PcyM_1028800
Transporters of the ER/Golgi and digestive vacuole membranes	PcyM_1310500
Transporters of the ER/Golgi and digestive vacuole membranes	PcyM_0411000
Transporters of the ER/Golgi and digestive vacuole membranes	PcyM_1008000
Transporters of the ER/Golgi and digestive vacuole membranes	PcyM_0115100
Transporters of the ER/Golgi and digestive vacuole membranes	PcyM_1444100
Transporters of the ER/Golgi and digestive vacuole membranes	PcyM_1008800
Transporters of the ER/Golgi and digestive vacuole membranes	PcyM_1413600
Transporters of the ER/Golgi and digestive vacuole membranes	PcyM_1248100
Transporters of the ER/Golgi and digestive vacuole membranes	PcyM_1214900
Transporters of the ER/Golgi and digestive vacuole membranes	PcyM_0626100
Transporters of the ER/Golgi and digestive vacuole membranes	PcyM_1117700
Transporters of the ER/Golgi and digestive vacuole membranes	PcyM_1458500
Transporters of the ER/Golgi and digestive vacuole membranes	PcyM_0915700
Transporters of the ER/Golgi and digestive vacuole membranes	PcyM_1256600
Transporters of the ER/Golgi and digestive vacuole membranes	PcyM_0211300
Transporters of the ER/Golgi and digestive vacuole membranes	PcyM_1408100
Transporters of the ER/Golgi and digestive vacuole membranes	PcyM_0308400
Transporters of the ER/Golgi and digestive vacuole membranes	PcyM_1012800
Transporters of the ER/Golgi and digestive vacuole membranes	PcyM_0736400
Transporters of the ER/Golgi and digestive vacuole membranes	PcyM_0211300
Transporters of the ER/Golgi and digestive vacuole membranes	PcyM_0509100
Transporters of the ER/Golgi and digestive vacuole membranes	PcyM_1452600
Transporters of the ER/Golgi and digestive vacuole membranes	PcyM_1236200
Transporters of the ER/Golgi and digestive vacuole membranes	PcyM_0211500
Genes involved in excision-repair	PcyM_1109500
Genes involved in excision-repair	PcyM_1102400
Genes involved in excision-repair	PcyM_0107600
Genes involved in excision-repair	PcyM_1322500
Genes involved in excision-repair	PcyM_1350600
Genes involved in excision-repair	PcyM_0907800
Genes involved in excision-repair	PcyM_1325300
Genes involved in excision-repair	PcyM_1220100
Genes involved in excision-repair	PcyM_0107600
Genes involved in excision-repair	PcyM_0810400
Genes involved in excision-repair	PcyM_1325300
Genes involved in excision-repair	PcyM_0421700
Genes involved in excision-repair	PcyM_0404000
Genes involved in excision-repair	PcyM_0812000
Genes involved in excision-repair	PcyM_1321800
Genes involved in excision-repair	PcyM_0402500
Genes involved in excision-repair	PcyM_0716000
Genes involved in excision-repair	PcyM_1147400
Genes involved in excision-repair	PcyM_1118500
Genes involved in excision-repair	PcyM_1109200
Genes involved in excision-repair	PcyM_0934100
Genes involved in excision-repair	PcyM_0420200
Genes involved in excision-repair	PcyM_1108200
Genes involved in excision-repair	PcyM_1107900
Genes involved in excision-repair	PcyM_0913200
Genes involved in excision-repair	PcyM_0321100
Genes involved in excision-repair	PcyM_0321200
Genes involved in excision-repair	PcyM_0627000
Genes involved in excision-repair	PcyM_1206400
Genes involved in excision-repair	PcyM_1135900
Genes involved in excision-repair	PcyM_0111900
Genes involved in excision-repair	PcyM_1347900
Genes involved in excision-repair	PcyM_0705900
Genes involved in excision-repair	PcyM_1119600
Genes involved in excision-repair	PcyM_1249600
Genes involved in excision-repair	PcyM_0420000
Genes involved in excision-repair	PcyM_0715400
Genes involved in excision-repair	PcyM_0215400
Genes involved in excision-repair	PcyM_0602300
Genes involved in excision-repair	PcyM_1344000
Genes involved in excision-repair	PcyM_0205300
Genes involved in excision-repair	PcyM_1114100
Genes involved in excision-repair	PcyM_0708800
Genes involved in excision-repair	PcyM_1213100
Genes involved in excision-repair	PcyM_1343500
Genes involved in excision-repair	PcyM_1301300
Genes involved in excision-repair	PcyM_1343400
Genes involved in excision-repair	PcyM_0920300
Nuclear proteome	PcyM_0838600
Genes involved in excision-repair	PcyM_0838600
Genes involved in excision-repair	PcyM_0832900
Genes involved in excision-repair	PcyM_0211700
Genes involved in excision-repair	PcyM_0736000
Genes involved in excision-repair	PcyM_1432000
Genes involved in excision-repair	PcyM_0312200
Genes involved in excision-repair	PcyM_1459800
Genes involved in excision-repair	PcyM_1226400
Genes involved in excision-repair	PcyM_1405600
Genes involved in excision-repair	PcyM_1474900
Genes involved in excision-repair	PcyM_1029900
Genes involved in excision-repair	PcyM_1028600
Genes involved in excision-repair	PcyM_1225000
Genes involved in excision-repair	PcyM_0807800
Genes involved in excision-repair	PcyM_1273800
Genes involved in excision-repair	PcyM_1319100
Genes involved in excision-repair	PcyM_1029700
Genes involved in excision-repair	PcyM_0702500
Genes involved in excision-repair	PcyM_1416600
Genes involved in excision-repair	PcyM_1274000
Genes involved in excision-repair	PcyM_0716900
Genes involved in excision-repair	PcyM_1465000
Genes involved in excision-repair	PcyM_0509400
Genes involved in excision-repair	PcyM_0310900
Genes involved in excision-repair	PcyM_1457500
Genes involved in excision-repair	PcyM_1265600
Genes involved in excision-repair	PcyM_1467500
Genes involved in excision-repair	PcyM_1447500
Hemoglobin digestion	PcyM_1269000
Hemozoin and b-hematin formation	PcyM_1269000
Genes coding for Fe-S containing proteins	PcyM_1214700
Genes coding for Fe-S containing proteins	PcyM_1006700
Genes coding for Fe-S containing proteins	PcyM_1276700
Genes coding for Fe-S containing proteins	PcyM_1433200
Genes coding for Fe-S containing proteins	PcyM_0320700
Genes coding for Fe-S containing proteins	PcyM_1135900
Genes coding for Fe-S containing proteins	PcyM_1419800
Genes coding for Fe-S containing proteins	PcyM_1434900
Genes coding for Fe-S containing proteins	PcyM_1103000
Genes coding for Fe-S containing proteins	PcyM_1128300
Genes coding for Fe-S containing proteins	PcyM_0709100
Genes coding for Fe-S containing proteins	PcyM_0727300
Genes coding for Fe-S containing proteins	PcyM_1211900
Genes coding for Fe-S containing proteins	PcyM_1449200
Genes coding for Fe-S containing proteins	PcyM_1349100
Mechanism of FeS-protein biogenesis	PcyM_1310000
Mechanism of FeS-protein biogenesis	PcyM_1419800
Mechanism of FeS-protein biogenesis	PcyM_1203900
Mechanism of FeS-protein biogenesis	PcyM_0610100
Mechanism of FeS-protein biogenesis	PcyM_0206500
Mechanism of FeS-protein biogenesis	PcyM_0944500
Mechanism of FeS-protein biogenesis	PcyM_1260500
Mechanism of FeS-protein biogenesis	PcyM_0320700
Mechanism of FeS-protein biogenesis	PcyM_0519700
Mechanism of FeS-protein biogenesis	PcyM_0526300
Mechanism of FeS-protein biogenesis	PcyM_0818800
Mechanism of FeS-protein biogenesis	PcyM_1260500
Mechanism of FeS-protein biogenesis	PcyM_1009100
Mechanism of FeS-protein biogenesis	PcyM_0417600
Mechanism of FeS-protein biogenesis	PcyM_0702900
Mechanism of FeS-protein biogenesis	PcyM_1109800
Mechanism of FeS-protein biogenesis	PcyM_0709100
Nuclear proteome	PcyM_0841800
Mechanism of FeS-protein biogenesis	PcyM_0841800
Mechanism of FeS-protein biogenesis	PcyM_0938800
Mechanism of FeS-protein biogenesis	PcyM_0720200
Maturation of snRNAs requires nuclear and cytoplasmic regulatory steps	PcyM_0841500
Mechanism of FeS-protein biogenesis	PcyM_1434900
Nuclear proteome	PcyM_0841500
Phosphoproteome -Collins et al 2014	PcyM_0841500
Mechanism of FeS-protein biogenesis	PcyM_0716200
Mechanism of FeS-protein biogenesis	PcyM_0732000
Mechanism of FeS-protein biogenesis	PcyM_0716200
Mechanism of FeS-protein biogenesis	PcyM_0938800
Mechanism of FeS-protein biogenesis	PcyM_0515400
Mechanism of FeS-protein biogenesis	PcyM_0839800
Mechanism of FeS-protein biogenesis	PcyM_0933100
Mechanism of FeS-protein biogenesis	PcyM_0928600
Mechanism of FeS-protein biogenesis	PcyM_0315900
Mechanism of FeS-protein biogenesis	PcyM_0216400
Mechanism of FeS-protein biogenesis	PcyM_1412700
Mechanism of FeS-protein biogenesis	PcyM_0515400
Genes coding for GPI-anchored membrane proteins	PcyM_1018600
Genes coding for GPI-anchored membrane proteins	PcyM_1033300
Genes coding for GPI-anchored membrane proteins	PcyM_0529800
Genes coding for GPI-anchored membrane proteins	PcyM_1025900
Genes coding for GPI-anchored membrane proteins	PcyM_0731200
Genes coding for GPI-anchored membrane proteins	PcyM_0619600
Genes coding for GPI-anchored membrane proteins	PcyM_0619700
Genes coding for GPI-anchored membrane proteins	PcyM_0619800
Genes coding for GPI-anchored membrane proteins	PcyM_1209700
Genes coding for GPI-anchored membrane proteins	PcyM_1209600
Genes coding for GPI-anchored membrane proteins	PcyM_1333200
Genes coding for GPI-anchored membrane proteins	PcyM_1107300
Genes coding for GPI-anchored membrane proteins	PcyM_0619900
Genes coding for GPI-anchored membrane proteins	PcyM_0824800
Genes coding for GPI-anchored membrane proteins	PcyM_1138400
Putative Golgi disassembly and reassembly mechanisms	PcyM_1209600
Genes coding for GPI-anchored membrane proteins	PcyM_0417900
Genes coding for GPI-anchored membrane proteins	PcyM_0417800
Genes coding for GPI-anchored membrane proteins	PcyM_1138500
Genes coding for GPI-anchored membrane proteins	PcyM_0306500
Genes coding for GPI-anchored membrane proteins	PcyM_1317200
Genes coding for GPI-anchored membrane proteins	PcyM_1029600
Glyoxalase metabolism	PcyM_1106700
Glyoxalase metabolism	PcyM_0308600
Glyoxalase metabolism	PcyM_1106700
Glyoxalase metabolism	PcyM_1147300
Glyoxalase metabolism	PcyM_1305900
Glyoxalase metabolism	PcyM_1347200
Glyoxalase metabolism	PcyM_0916100
Glyoxalase metabolism	PcyM_1347200
Histone acetylation	PcyM_0921200
Histone acetylation	PcyM_0207700
Histone acetylation	PcyM_1427300
Histone acetylation	PcyM_1133000
Histone acetylation	PcyM_0510300
Histone acetylation	PcyM_1208900
Histone acetylation	PcyM_1132800
Histone acetylation	PcyM_0815300
Histone acetylation	PcyM_0802700
Histone acetylation	PcyM_0805700
Histone acetylation	PcyM_1236000
Histone acetylation	PcyM_1432200
Histone acetylation	PcyM_0820800
Histone acetylation	PcyM_1223800
Histone acetylation	PcyM_1424200
Histone acetylation	PcyM_0724900
Histone acetylation	PcyM_0906800
Histone acetylation	PcyM_1141000
Histone acetylation	PcyM_0906900
Histone acetylation	PcyM_1210100
Histone acetylation	PcyM_1229200
Involvement of GTP-binding proteins and ribosomes in amino acid shortage	PcyM_1313300
Involvement of GTP-binding proteins and ribosomes in amino acid shortage	PcyM_1406800
Involvement of GTP-binding proteins and ribosomes in amino acid shortage	PcyM_1007300
Kinetochores power chromosome movements in mitosis	PcyM_0614600
Kinetochores power chromosome movements in mitosis	PcyM_0219000
Kinetochores power chromosome movements in mitosis	PcyM_0118700
Kinetochores power chromosome movements in mitosis	PcyM_0727500
Kinetochores power chromosome movements in mitosis	PcyM_0205600
Kinetochores power chromosome movements in mitosis	PcyM_0916400
Kinetochores power chromosome movements in mitosis	PcyM_0825500
Kinetochores power chromosome movements in mitosis	PcyM_1247000
Kinetochores power chromosome movements in mitosis	PcyM_0808300
Kinetochores power chromosome movements in mitosis	PcyM_1133400
Kinetochores power chromosome movements in mitosis	PcyM_0532100
Kinetochores power chromosome movements in mitosis	PcyM_0701400
Kinetochores power chromosome movements in mitosis	PcyM_0219100
Kinetochores power chromosome movements in mitosis	PcyM_0511200
Kinetochores power chromosome movements in mitosis	PcyM_1437900
Kinetochores power chromosome movements in mitosis	PcyM_1433900
Kinetochores power chromosome movements in mitosis	PcyM_0701400
Kinetochores power chromosome movements in mitosis	PcyM_1468500
Kinetochores power chromosome movements in mitosis	PcyM_0834500
Kinetochores power chromosome movements in mitosis	PcyM_0532100
Kinetochores power chromosome movements in mitosis	PcyM_1125700
Kinetochores power chromosome movements in mitosis	PcyM_1034000
Kinetochores power chromosome movements in mitosis	PcyM_1114400
Kinetochores power chromosome movements in mitosis	PcyM_1280100
Kinetochores power chromosome movements in mitosis	PcyM_1247000
Kinetochores power chromosome movements in mitosis	PcyM_0735700
Kinetochores power chromosome movements in mitosis	PcyM_0824400
Kinetochores power chromosome movements in mitosis	PcyM_0610300
Kinetochores power chromosome movements in mitosis	PcyM_0323800
Kinetochores power chromosome movements in mitosis	PcyM_0606500
Kinetochores power chromosome movements in mitosis	PcyM_0205600
Kinetochores power chromosome movements in mitosis	PcyM_1333100
Kinetochores power chromosome movements in mitosis	PcyM_0951800
Kinetochores power chromosome movements in mitosis	PcyM_1210500
Kinetochores power chromosome movements in mitosis	PcyM_0115400
Kinetochores power chromosome movements in mitosis	PcyM_1326800
Kinetochores power chromosome movements in mitosis	PcyM_0610300
Kinetochores power chromosome movements in mitosis	PcyM_1134400
Leucine, Isoleucine and Valine metabolism	PcyM_1414400
Leucine, Isoleucine and Valine metabolism	PcyM_1029500
Leucine, Isoleucine and Valine metabolism	PcyM_1224700
Leucine, Isoleucine and Valine metabolism	PcyM_1464200
Leucine, Isoleucine and Valine metabolism	PcyM_0832000
Leucine, Isoleucine and Valine metabolism	PcyM_1127700
Leucine, Isoleucine and Valine metabolism	PcyM_0410000
Phosphoproteome -Collins et al 2014	PcyM_0410000
Leucine, Isoleucine and Valine metabolism	PcyM_1250900
Leucine, Isoleucine and Valine metabolism	PcyM_0602500
Leucine, Isoleucine and Valine metabolism	PcyM_0840600
Leucine, Isoleucine and Valine metabolism	PcyM_0505000
Leucine, Isoleucine and Valine metabolism	PcyM_1454900
Leucine, Isoleucine and Valine metabolism	PcyM_1328100
Single Gene/enzyme deletions predicted to cause impairment of metabolic network	PcyM_1011300
U6 snRNP role in pre-mRNA splicing	PcyM_1011500
Lsm proteins and RNA processing	PcyM_0908800
Lsm proteins and RNA processing	PcyM_0514200
Lsm proteins and RNA processing	PcyM_0707600
Lsm proteins and RNA processing	PcyM_0503900
Lsm proteins and RNA processing	PcyM_1272500
U6 snRNP role in pre-mRNA splicing	PcyM_1011500
Lsm proteins and RNA processing	PcyM_0928300
U6 snRNP role in pre-mRNA splicing	PcyM_0503900
Lsm proteins and RNA processing	PcyM_1410500
Lsm proteins and RNA processing	PcyM_1011500
Lsm proteins and RNA processing	PcyM_1309800
Nuclear proteome	PcyM_1011500
Lysine metabolism	PcyM_0402900
Lysine metabolism	PcyM_0521600
Lysine metabolism	PcyM_1337500
Lysine metabolism	PcyM_1206100
Established and putative Maurers clefts proteins	PcyM_1034100
Established and putative Maurers clefts proteins	PcyM_1250000
Established and putative Maurers clefts proteins	PcyM_0506700
Established and putative Maurers clefts proteins	PcyM_1402000
Established and putative Maurers clefts proteins	PcyM_0709600
Established and putative Maurers clefts proteins	PcyM_0737900
Established and putative Maurers clefts proteins	PcyM_1402000
Established and putative Maurers clefts proteins	PcyM_1017600
Established and putative Maurers clefts proteins	PcyM_0505300
Established and putative Maurers clefts proteins	PcyM_0737900
Established and putative Maurers clefts proteins	PcyM_0737900
Established and putative Maurers clefts proteins	PcyM_1403600
Established and putative Maurers clefts proteins	PcyM_1271000
Established and putative Maurers clefts proteins	PcyM_1442300
Established and putative Maurers clefts proteins	PcyM_1402000
Established and putative Maurers clefts proteins	PcyM_0716200
Established and putative Maurers clefts proteins	PcyM_0515400
Established and putative Maurers clefts proteins	PcyM_1270100
Established and putative Maurers clefts proteins	PcyM_0626700
Established and putative Maurers clefts proteins	PcyM_1034300
Established and putative Maurers clefts proteins	PcyM_0511100
Established and putative Maurers clefts proteins	PcyM_0841300
Established and putative Maurers clefts proteins	PcyM_0906200
Established and putative Maurers clefts proteins	PcyM_0102700
Established and putative Maurers clefts proteins	PcyM_0109400
Established and putative Maurers clefts proteins	PcyM_0938800
Established and putative Maurers clefts proteins	PcyM_1436500
Established and putative Maurers clefts proteins	PcyM_0416000
Established and putative Maurers clefts proteins	PcyM_0800900
Established and putative Maurers clefts proteins	PcyM_0628900
Established and putative Maurers clefts proteins	PcyM_1213600
Established and putative Maurers clefts proteins	PcyM_0122200
Established and putative Maurers clefts proteins	PcyM_0816700
Established and putative Maurers clefts proteins	PcyM_0738200
Established and putative Maurers clefts proteins	PcyM_0408500
Established and putative Maurers clefts proteins	PcyM_0109400
Established and putative Maurers clefts proteins	PcyM_1234100
Established and putative Maurers clefts proteins	PcyM_0503600
Established and putative Maurers clefts proteins	PcyM_0716200
Established and putative Maurers clefts proteins	PcyM_0515400
MSPDBL and MSP1 mediate merozoite invasion	PcyM_0703100
Established and putative Maurers clefts proteins	PcyM_1451400
Phosphoproteome -Collins et al 2014	PcyM_0703100
Established and putative Maurers clefts proteins	PcyM_0526400
Established and putative Maurers clefts proteins	PcyM_1313500
Proteins of erythrocyte-derived microvesicles	PcyM_0703100
Established and putative Maurers clefts proteins	PcyM_0938800
Established and putative Maurers clefts proteins	PcyM_1148600
Established and putative Maurers clefts proteins	PcyM_0416200
Established and putative Maurers clefts proteins	PcyM_0416300
Established and putative Maurers clefts proteins	PcyM_0808900
Established and putative Maurers clefts proteins	PcyM_0308500
Established and putative Maurers clefts proteins	PcyM_1240800
Established and putative Maurers clefts proteins	PcyM_0416500
Established and putative Maurers clefts proteins	PcyM_0416600
Established and putative Maurers clefts proteins	PcyM_0716200
Established and putative Maurers clefts proteins	PcyM_0416700
Established and putative Maurers clefts proteins	PcyM_0417200
Established and putative Maurers clefts proteins	PcyM_0417300
Established and putative Maurers clefts proteins	PcyM_1006200
Established and putative Maurers clefts proteins	PcyM_0813000
Established and putative Maurers clefts proteins	PcyM_0516800
Established and putative Maurers clefts proteins	PcyM_0417400
Established and putative Maurers clefts proteins	PcyM_0515400
Established and putative Maurers clefts proteins	PcyM_0417100
Established and putative Maurers clefts proteins	PcyM_0703100
Established and putative Maurers clefts proteins	PcyM_0938800
Established and putative Maurers clefts proteins	PcyM_0730000
Established and putative Maurers clefts proteins	PcyM_0924700
Established and putative Maurers clefts proteins	PcyM_0833000
Phosphoproteome -Collins et al 2014	PcyM_0833000
Established and putative Maurers clefts proteins	PcyM_0417400
Established and putative Maurers clefts proteins	PcyM_0417300
Established and putative Maurers clefts proteins	PcyM_0417200
Established and putative Maurers clefts proteins	PcyM_0920200
Established and putative Maurers clefts proteins	PcyM_0417100
Established and putative Maurers clefts proteins	PcyM_1123400
Established and putative Maurers clefts proteins	PcyM_0416700
Established and putative Maurers clefts proteins	PcyM_0416600
Established and putative Maurers clefts proteins	PcyM_0416500
Established and putative Maurers clefts proteins	PcyM_0422500
Established and putative Maurers clefts proteins	PcyM_0729600
Established and putative Maurers clefts proteins	PcyM_1340500
Established and putative Maurers clefts proteins	PcyM_0416300
Established and putative Maurers clefts proteins	PcyM_0416200
Established and putative Maurers clefts proteins	PcyM_1276000
Established and putative Maurers clefts proteins	PcyM_0407300
Established and putative Maurers clefts proteins	PcyM_1442300
Established and putative Maurers clefts proteins	PcyM_1280500
Established and putative Maurers clefts proteins	PcyM_1256600
Established and putative Maurers clefts proteins	PcyM_0316900
Established and putative Maurers clefts proteins	PcyM_0416000
Established and putative Maurers clefts proteins	PcyM_0318000
Possible reasons for increased permeability of host cell membrane	PcyM_0737900
Possible reasons for increased permeability of host cell membrane	PcyM_0737900
Possible reasons for increased permeability of host cell membrane	PcyM_1402000
Possible reasons for increased permeability of host cell membrane	PcyM_1402000
Exported parasite proteins associated with Maurers clefts	PcyM_0730000
Exported parasite proteins associated with Maurers clefts	PcyM_0729600
Exported parasite proteins associated with Maurers clefts	PcyM_1034300
Exported parasite proteins associated with Maurers clefts	PcyM_0505300
Exported parasite proteins associated with Maurers clefts	PcyM_0800900
Exported parasite proteins associated with Maurers clefts	PcyM_1340500
Maurers clefts	PcyM_0013500
Maurers clefts	PcyM_1403200
Functional annotation of merozoite invasion-related proteins	PcyM_1033300
Functional annotation of merozoite invasion-related proteins	PcyM_0918500
Functional annotation of merozoite invasion-related proteins	PcyM_1107300
Functional annotation of merozoite invasion-related proteins	PcyM_0424000
Functional annotation of merozoite invasion-related proteins	PcyM_0307400
Functional annotation of merozoite invasion-related proteins	PcyM_0938200
Functional annotation of merozoite invasion-related proteins	PcyM_1222300
Functional annotation of merozoite invasion-related proteins	PcyM_1438300
Functional annotation of merozoite invasion-related proteins	PcyM_0529800
Functional annotation of merozoite invasion-related proteins	PcyM_0826000
Functional annotation of merozoite invasion-related proteins	PcyM_1034100
Functional annotation of merozoite invasion-related proteins	PcyM_0535100
Hemoglobin digestion	PcyM_0941900
Functional annotation of merozoite invasion-related proteins	PcyM_1223000
Functional annotation of merozoite invasion-related proteins	PcyM_1138500
Functional annotation of merozoite invasion-related proteins	PcyM_0817800
Functional annotation of merozoite invasion-related proteins	PcyM_1476200
Functional annotation of merozoite invasion-related proteins	PcyM_0424000
Functional annotation of merozoite invasion-related proteins	PcyM_0703100
Functional annotation of merozoite invasion-related proteins	PcyM_1421800
Functional annotation of merozoite invasion-related proteins	PcyM_0535100
Functional annotation of merozoite invasion-related proteins	PcyM_1476400
Functional annotation of merozoite invasion-related proteins	PcyM_1034100
Functional annotation of merozoite invasion-related proteins	PcyM_1137800
Functional annotation of merozoite invasion-related proteins	PcyM_1152100
Functional annotation of merozoite invasion-related proteins	PcyM_0628800
Functional annotation of merozoite invasion-related proteins	PcyM_0533700
Functional annotation of merozoite invasion-related proteins	PcyM_0941900
Functional annotation of merozoite invasion-related proteins	PcyM_0307000
Functional annotation of merozoite invasion-related proteins	PcyM_0417900
Functional annotation of merozoite invasion-related proteins	PcyM_1025900
Functional annotation of merozoite invasion-related proteins	PcyM_1422400
Merozoite ligands, their erythrocyte receptors	PcyM_1263300
Functional annotation of merozoite invasion-related proteins	PcyM_1476400
Functional annotation of merozoite invasion-related proteins	PcyM_0730000
Functional annotation of merozoite invasion-related proteins	PcyM_0729600
Functional annotation of merozoite invasion-related proteins	PcyM_0417300
Functional annotation of merozoite invasion-related proteins	PcyM_0417400
Functional annotation of merozoite invasion-related proteins	PcyM_0737900
Functional annotation of merozoite invasion-related proteins	PcyM_1402000
Functional annotation of merozoite invasion-related proteins	PcyM_0417400
Functional annotation of merozoite invasion-related proteins	PcyM_0417300
Functional annotation of merozoite invasion-related proteins	PcyM_0417200
Functional annotation of merozoite invasion-related proteins	PcyM_0417100
Functional annotation of merozoite invasion-related proteins	PcyM_0416700
Functional annotation of merozoite invasion-related proteins	PcyM_0416600
Functional annotation of merozoite invasion-related proteins	PcyM_0416500
Functional annotation of merozoite invasion-related proteins	PcyM_0737900
Functional annotation of merozoite invasion-related proteins	PcyM_1402000
Functional annotation of merozoite invasion-related proteins	PcyM_0416300
Functional annotation of merozoite invasion-related proteins	PcyM_0416200
Functional annotation of merozoite invasion-related proteins	PcyM_0416000
Functional annotation of merozoite invasion-related proteins	PcyM_0518000
Functional annotation of merozoite invasion-related proteins	PcyM_0731200
Functional annotation of merozoite invasion-related proteins	PcyM_0737900
Functional annotation of merozoite invasion-related proteins	PcyM_0416000
Functional annotation of merozoite invasion-related proteins	PcyM_0416300
Functional annotation of merozoite invasion-related proteins	PcyM_0602400
Functional annotation of merozoite invasion-related proteins	PcyM_0322500
Functional annotation of merozoite invasion-related proteins	PcyM_0410400
Functional annotation of merozoite invasion-related proteins	PcyM_0416000
Functional annotation of merozoite invasion-related proteins	PcyM_0416200
Functional annotation of merozoite invasion-related proteins	PcyM_0416300
Functional annotation of merozoite invasion-related proteins	PcyM_0416500
Functional annotation of merozoite invasion-related proteins	PcyM_0416600
Functional annotation of merozoite invasion-related proteins	PcyM_0416700
Functional annotation of merozoite invasion-related proteins	PcyM_0417100
Functional annotation of merozoite invasion-related proteins	PcyM_0417200
Functional annotation of merozoite invasion-related proteins	PcyM_0417400
Functional annotation of merozoite invasion-related proteins	PcyM_0417300
Functional annotation of merozoite invasion-related proteins	PcyM_0417200
Functional annotation of merozoite invasion-related proteins	PcyM_0417100
Functional annotation of merozoite invasion-related proteins	PcyM_1345100
Functional annotation of merozoite invasion-related proteins	PcyM_0416700
Functional annotation of merozoite invasion-related proteins	PcyM_0416600
Functional annotation of merozoite invasion-related proteins	PcyM_0416500
Functional annotation of merozoite invasion-related proteins	PcyM_0416200
Functional annotation of merozoite invasion-related proteins	PcyM_1402000
Functional annotation of merozoite invasion-related proteins	PcyM_1333200
Functional annotation of merozoite invasion-related proteins	PcyM_1402000
Functional annotation of merozoite invasion-related proteins	PcyM_1402000
Functional annotation of merozoite invasion-related proteins	PcyM_0737900
Functional annotation of merozoite invasion-related proteins	PcyM_1263300
Phosphoproteome -Collins et al 2014	PcyM_1263300
Functional annotation of merozoite invasion-related proteins	PcyM_0417800
Functional annotation of merozoite invasion-related proteins	PcyM_0737900
Protein N-terminal acetylation	PcyM_0503900
Protein N-terminal acetylation	PcyM_1467400
Protein N-terminal acetylation	PcyM_1236000
Protein N-terminal acetylation	PcyM_0607300
Protein N-terminal acetylation	PcyM_0802700
Protein N-terminal acetylation	PcyM_0116800
Phosphoproteome -Collins et al 2014	PcyM_1421100
Phosphoproteome -Collins et al 2014	PcyM_1421600
Putative Golgi disassembly and reassembly mechanisms	PcyM_1421600
Protein N-terminal acetylation	PcyM_0116800
Protein N-terminal acetylation	PcyM_1421100
Cotranslational cleavage of N-terminal methionine residues and N-terminal acetylation	PcyM_0802700
Cotranslational cleavage of N-terminal methionine residues and N-terminal acetylation	PcyM_1317000
Cotranslational cleavage of N-terminal methionine residues and N-terminal acetylation	PcyM_0724900
Cotranslational cleavage of N-terminal methionine residues and N-terminal acetylation	PcyM_0207700
Cotranslational cleavage of N-terminal methionine residues and N-terminal acetylation	PcyM_1263900
Cotranslational cleavage of N-terminal methionine residues and N-terminal acetylation	PcyM_1467400
Cotranslational cleavage of N-terminal methionine residues and N-terminal acetylation	PcyM_0816000
Cotranslational cleavage of N-terminal methionine residues and N-terminal acetylation	PcyM_1229200
Cotranslational cleavage of N-terminal methionine residues and N-terminal acetylation	PcyM_0207700
Cotranslational cleavage of N-terminal methionine residues and N-terminal acetylation	PcyM_1004200
Nucleosome assembly and regulation	PcyM_1228600
Nucleosome assembly and regulation	PcyM_0906800
Nucleosome assembly and regulation	PcyM_0905400
Nuclear proteome	PcyM_0905400
ADP ribosylation factors functions in the secretory pathway	PcyM_0624600
Nucleosome assembly and regulation	PcyM_1133000
Nucleosome assembly and regulation	PcyM_1274500
Nucleosome assembly and regulation	PcyM_1274500
Nucleosome assembly and regulation	PcyM_0206000
Nucleosome assembly and regulation	PcyM_1424200
Nucleosome assembly and regulation	PcyM_1440900
Nucleosome assembly and regulation	PcyM_1303700
Nucleosome assembly and regulation	PcyM_0624600
ADP ribosylation factors functions in the secretory pathway	PcyM_0624600
Nucleosome assembly and regulation	PcyM_0927700
Nucleosome assembly and regulation	PcyM_1014900
Myristoylated proteins	PcyM_0624600
Nucleosome assembly and regulation	PcyM_0719200
Nucleosome assembly and regulation	PcyM_0906900
Nucleosome assembly and regulation	PcyM_1417900
Nucleosome assembly and regulation	PcyM_1223800
Nucleosome assembly and regulation	PcyM_1444900
Nucleosome assembly and regulation	PcyM_1132800
Nucleosome assembly and regulation	PcyM_1302700
Nucleosome assembly and regulation	PcyM_1273900
Nucleosome assembly and regulation	PcyM_1112400
Nucleosome assembly and regulation	PcyM_1140000
Nucleosome assembly and regulation	PcyM_1114100
Nucleosome assembly and regulation	PcyM_0906000
Nucleosome assembly and regulation	PcyM_0717400
Nuclear proteome	PcyM_0905500
Nucleosome assembly and regulation	PcyM_0517200
Nucleosome assembly and regulation	PcyM_1318400
Phosphoproteome -Collins et al 2014	PcyM_0905500
Nucleosome assembly and regulation	PcyM_0607300
Nucleosome assembly and regulation	PcyM_0921200
Nucleosome assembly and regulation	PcyM_1228600
Nucleosome assembly and regulation	PcyM_0516200
Nucleosome assembly and regulation	PcyM_1318400
Nucleosome assembly and regulation	PcyM_0906000
Nucleosome assembly and regulation	PcyM_0820800
Nucleosome assembly and regulation	PcyM_1141000
A model for UbpX function in the regulation of PCNA deubiquitylation	PcyM_1109500
A model for UbpX function in the regulation of PCNA deubiquitylation	PcyM_1105400
A model for UbpX function in the regulation of PCNA deubiquitylation	PcyM_0521800
Hemoglobin digestion	PcyM_1004200
A model for UbpX function in the regulation of PCNA deubiquitylation	PcyM_1428800
A model for UbpX function in the regulation of PCNA deubiquitylation	PcyM_0602300
A model for UbpX function in the regulation of PCNA deubiquitylation	PcyM_1004300
Phosphoproteome -Collins et al 2014	PcyM_1004300
Nuclear proteome	PcyM_1004300
A model for UbpX function in the regulation of PCNA deubiquitylation	PcyM_1418700
A model for UbpX function in the regulation of PCNA deubiquitylation	PcyM_1340100
A model for UbpX function in the regulation of PCNA deubiquitylation	PcyM_1004500
A model for UbpX function in the regulation of PCNA deubiquitylation	PcyM_0708800
A model for UbpX function in the regulation of PCNA deubiquitylation	PcyM_1416500
A model for UbpX function in the regulation of PCNA deubiquitylation	PcyM_0520700
A model for UbpX function in the regulation of PCNA deubiquitylation	PcyM_1213100
A model for UbpX function in the regulation of PCNA deubiquitylation	PcyM_1015800
A model for UbpX function in the regulation of PCNA deubiquitylation	PcyM_1213100
A model for UbpX function in the regulation of PCNA deubiquitylation	PcyM_1340100
Hemoglobin digestion	PcyM_1253300
Phosphatidylinositol 3-kinase (PI3K)-controlled endocytosis of host cell hemoglobin	PcyM_1017300
Phosphoproteome -Collins et al 2014	PcyM_1017300
ADP ribosylation factors functions in the secretory pathway	PcyM_0831600
Shared themes in cascading Rab and phosphoinositide pathways	PcyM_0831600
Phosphatidylinositol 3-kinase (PI3K)-controlled endocytosis of host cell hemoglobin	PcyM_1253300
Shared themes in cascading Rab and phosphoinositide pathways	PcyM_0831600
Phosphatidylinositol 3-kinase (PI3K)-controlled endocytosis of host cell hemoglobin	PcyM_0831600
Phosphoinositides and membrane traffic	PcyM_1017300
Phosphoinositides and membrane traffic	PcyM_1412200
Phosphoinositides and membrane traffic	PcyM_1439700
Phosphoinositides and membrane traffic	PcyM_0620100
Phosphoinositides and membrane traffic	PcyM_0411900
Phosphoinositides and membrane traffic	PcyM_0206100
Phosphoinositides and membrane traffic	PcyM_0831600
Phosphoinositides and membrane traffic	PcyM_0936600
Phosphoinositides and membrane traffic	PcyM_1004000
Phosphoinositides and membrane traffic	PcyM_1469100
Phosphoinositides and membrane traffic	PcyM_0813500
Phosphoinositides and membrane traffic	PcyM_1117900
Phosphoinositides and membrane traffic	PcyM_0622100
Phosphoinositides and membrane traffic	PcyM_1253300
Phosphoinositides and membrane traffic	PcyM_0920600
Phosphoinositides and membrane traffic	PcyM_1235800
Phosphoinositides and membrane traffic	PcyM_0120100
Phosphoinositides and membrane traffic	PcyM_1017300
Model for metabolic compartmentalization of PI biosynthesis	PcyM_0621500
Model for metabolic compartmentalization of PI biosynthesis	PcyM_1125500
Model for metabolic compartmentalization of PI biosynthesis	PcyM_0737300
Model for metabolic compartmentalization of PI biosynthesis	PcyM_1126200
Model for metabolic compartmentalization of PI biosynthesis	PcyM_0709300
Model for metabolic compartmentalization of PI biosynthesis	PcyM_1021300
Model for metabolic compartmentalization of PI biosynthesis	PcyM_0946100
Model for metabolic compartmentalization of PI biosynthesis	PcyM_1417300
Single Gene/enzyme deletions predicted to cause impairment of metabolic network	PcyM_1417300
Model for metabolic compartmentalization of PI biosynthesis	PcyM_1131700
Model for metabolic compartmentalization of PI biosynthesis	PcyM_0420100
Transporters of the plasma membrane	PcyM_1325200
Transporters of the plasma membrane	PcyM_0413500
Transporters of the plasma membrane	PcyM_1256600
Transporters of the plasma membrane	PcyM_0944800
Transporters of the plasma membrane	PcyM_0609900
Transporters of the plasma membrane	PcyM_0937400
Transporters of the plasma membrane	PcyM_0609400
Phosphoproteome -Collins et al 2014	PcyM_0825300
Transporters of the plasma membrane	PcyM_1240700
Transporters of the plasma membrane	PcyM_0609300
Transporters of the plasma membrane	PcyM_0937700
Transporters of the plasma membrane	PcyM_1331900
Transporters of the plasma membrane	PcyM_1426100
Transporters of the plasma membrane	PcyM_1209200
Transporters of the plasma membrane	PcyM_0822900
Transporters of the plasma membrane	PcyM_0923300
Phosphoproteome -Collins et al 2014	PcyM_1325200
Transporters of the plasma membrane	PcyM_0804200
Phosphoproteome -Collins et al 2014	PcyM_0825400
Transporters of the plasma membrane	PcyM_1312800
Transporters of the plasma membrane	PcyM_1215900
Transporters of the plasma membrane	PcyM_1439700
Transporters of the plasma membrane	PcyM_1242800
Transporters of the plasma membrane	PcyM_1117700
Transporters of the plasma membrane	PcyM_0316200
Transporters of the plasma membrane	PcyM_1142600
Transporters of the plasma membrane	PcyM_1148500
Transporters of the plasma membrane	PcyM_0308400
Transporters of the plasma membrane	PcyM_1443500
Transporters of the plasma membrane	PcyM_1443600
Transporters of the plasma membrane	PcyM_1214900
Transporters of the plasma membrane	PcyM_1426000
Transporters of the plasma membrane	PcyM_0825400
Transporters of the plasma membrane	PcyM_0412900
Transporters of the plasma membrane	PcyM_1312800
Phosphoproteome -Collins et al 2014	PcyM_0726100
Transporters of the plasma membrane	PcyM_0919000
Transporters of the plasma membrane	PcyM_1405700
Transporters of the plasma membrane	PcyM_0211500
Transporters of the plasma membrane	PcyM_0420100
Phosphoproteome -Collins et al 2014	PcyM_0919000
Transporters of the plasma membrane	PcyM_1017100
Transporters of the plasma membrane	PcyM_0736400
Transporters of the plasma membrane	PcyM_1275100
Transporters of the plasma membrane	PcyM_1012800
Transporters of the plasma membrane	PcyM_0906600
Transporters of the plasma membrane	PcyM_1248100
Transporters of the plasma membrane	PcyM_1277100
Transporters of the plasma membrane	PcyM_1458500
Transporters of the plasma membrane	PcyM_1267900
Transporters of the plasma membrane	PcyM_0214900
Transporters of the plasma membrane	PcyM_0509100
Transporters of the plasma membrane	PcyM_1120500
Transporters of the plasma membrane	PcyM_0702600
Transporters of the plasma membrane	PcyM_1236200
Transporters of the plasma membrane	PcyM_1408100
Transporters of the plasma membrane	PcyM_0626700
Transporters of the plasma membrane	PcyM_0726100
Single Gene/enzyme deletions predicted to cause impairment of metabolic network	PcyM_0726500
Transporters of the plasma membrane	PcyM_1448500
Transporters of the plasma membrane	PcyM_0504600
Transporters of the plasma membrane	PcyM_0115100
Transporters of the plasma membrane	PcyM_0418700
Transporters of the plasma membrane	PcyM_1413600
Phosphoproteome -Collins et al 2014	PcyM_0907800
Nuclear proteome	PcyM_0907800
Translocon of exported proteins (PTEX)	PcyM_1240800
Translocon of exported proteins (PTEX)	PcyM_0919300
Proteins of the parasitophorous vacuolar membrane	PcyM_0907400
Translocon of exported proteins (PTEX)	PcyM_0907400
Translocon of exported proteins (PTEX)	PcyM_1211300
Subcellular location of exported proteins	PcyM_0907400
Nuclear proteome	PcyM_0514200
Encoded proteins that could be constituents of P-bodies	PcyM_0822700
Encoded proteins that could be constituents of P-bodies	PcyM_0833200
Encoded proteins that could be constituents of P-bodies	PcyM_1272300
Encoded proteins that could be constituents of P-bodies	PcyM_0514200
Encoded proteins that could be constituents of P-bodies	PcyM_0209800
U6 snRNP role in pre-mRNA splicing	PcyM_0514200
Encoded proteins that could be constituents of P-bodies	PcyM_1208900
Encoded proteins that could be constituents of P-bodies	PcyM_0725100
Encoded proteins that could be constituents of P-bodies	PcyM_1272500
Encoded proteins that could be constituents of P-bodies	PcyM_1346300
Encoded proteins that could be constituents of P-bodies	PcyM_0820900
Single Gene/enzyme deletions predicted to cause impairment of metabolic network	PcyM_1206800
Encoded proteins that could be constituents of P-bodies	PcyM_1206800
Encoded proteins that could be constituents of P-bodies	PcyM_0707600
Phosphoproteome -Collins et al 2014	PcyM_1206400
Encoded proteins that could be constituents of P-bodies	PcyM_1410500
Encoded proteins that could be constituents of P-bodies	PcyM_0714800
Encoded proteins that could be constituents of P-bodies	PcyM_1430300
Encoded proteins that could be constituents of P-bodies	PcyM_1309800
Encoded proteins that could be constituents of P-bodies	PcyM_1352100
Encoded proteins that could be constituents of P-bodies	PcyM_0827000
Encoded proteins that could be constituents of P-bodies	PcyM_0928300
Encoded proteins that could be constituents of P-bodies	PcyM_1210100
Encoded proteins that could be constituents of P-bodies	PcyM_0529700
Myristoylated proteins	PcyM_0522700
Encoded proteins that could be constituents of P-bodies	PcyM_0522600
Encoded proteins that could be constituents of P-bodies	PcyM_1427300
Encoded proteins that could be constituents of P-bodies	PcyM_0805700
Encoded proteins that could be constituents of P-bodies	PcyM_1230600
Encoded proteins that could be constituents of P-bodies	PcyM_1012400
Encoded proteins that could be constituents of P-bodies	PcyM_1314600
Encoded proteins that could be constituents of P-bodies	PcyM_0804900
Encoded proteins that could be constituents of P-bodies	PcyM_1026400
Encoded proteins that could be constituents of P-bodies	PcyM_1011500
Putative Golgi disassembly and reassembly mechanisms	PcyM_0722400
Role of perforin 1 in merozoite egress	PcyM_1437000
Role of perforin 1 in merozoite egress	PcyM_0311200
Role of perforin 1 in merozoite egress	PcyM_0514800
Role of perforin 1 in merozoite egress	PcyM_0722100
Role of perforin 1 in merozoite egress	PcyM_0515000
Genes coding for chaperones and their regulators	PcyM_0821500
Genes coding for chaperones and their regulators	PcyM_0944300
Genes coding for chaperones and their regulators	PcyM_1435500
Genes coding for chaperones and their regulators	PcyM_0938800
Nuclear proteome	PcyM_1238600
Genes coding for chaperones and their regulators	PcyM_1271900
Genes coding for chaperones and their regulators	PcyM_1317300
Genes coding for chaperones and their regulators	PcyM_1471000
Genes coding for chaperones and their regulators	PcyM_1313400
Genes coding for chaperones and their regulators	PcyM_0716200
Genes coding for chaperones and their regulators	PcyM_1032900
Genes coding for chaperones and their regulators	PcyM_1331600
Genes coding for chaperones and their regulators	PcyM_0325000
Genes coding for chaperones and their regulators	PcyM_0515400
Genes coding for chaperones and their regulators	PcyM_1412400
Genes coding for chaperones and their regulators	PcyM_0716200
Genes coding for chaperones and their regulators	PcyM_0515400
Genes coding for chaperones and their regulators	PcyM_0115500
Genes coding for chaperones and their regulators	PcyM_0938800
Genes coding for chaperones and their regulators	PcyM_0705200
Genes coding for chaperones and their regulators	PcyM_1021100
Genes coding for chaperones and their regulators	PcyM_0115500
Genes coding for chaperones and their regulators	PcyM_0717500
Genes coding for chaperones and their regulators	PcyM_0941800
Genes coding for chaperones and their regulators	PcyM_1227200
Genes coding for chaperones and their regulators	PcyM_0505300
Genes coding for chaperones and their regulators	PcyM_0519700
Genes coding for chaperones and their regulators	PcyM_0408600
Genes coding for chaperones and their regulators	PcyM_0117800
Genes coding for chaperones and their regulators	PcyM_1023100
Genes coding for chaperones and their regulators	PcyM_0311900
Genes coding for chaperones and their regulators	PcyM_1415000
Genes coding for chaperones and their regulators	PcyM_1408700
Genes coding for chaperones and their regulators	PcyM_1312300
Genes coding for chaperones and their regulators	PcyM_0702200
Localization and function of some Hsp40s and Hsp70s	PcyM_1312300
Genes coding for chaperones and their regulators	PcyM_0731500
Genes coding for chaperones and their regulators	PcyM_1004000
Genes coding for chaperones and their regulators	PcyM_1406000
Phosphoproteome -Collins et al 2014	PcyM_1150100
Nuclear proteome	PcyM_1312300
Myristoylated proteins	PcyM_1118800
Genes coding for chaperones and their regulators	PcyM_1118800
Nuclear proteome	PcyM_0705500
Genes coding for chaperones and their regulators	PcyM_0705300
Genes coding for chaperones and their regulators	PcyM_1432700
Genes coding for chaperones and their regulators	PcyM_1002800
Phosphoproteome -Collins et al 2014	PcyM_1002800
Nuclear proteome	PcyM_0705300
Genes coding for chaperones and their regulators	PcyM_1435600
Genes coding for chaperones and their regulators	PcyM_0948000
Genes coding for chaperones and their regulators	PcyM_0509700
Genes coding for chaperones and their regulators	PcyM_1224500
Genes coding for chaperones and their regulators	PcyM_1212300
Genes coding for chaperones and their regulators	PcyM_0819300
Genes coding for chaperones and their regulators	PcyM_1465200
Genes coding for chaperones and their regulators	PcyM_1223300
Genes coding for chaperones and their regulators	PcyM_0311900
Genes coding for chaperones and their regulators	PcyM_1452800
Genes coding for chaperones and their regulators	PcyM_1422700
Genes coding for chaperones and their regulators	PcyM_1311900
Genes coding for chaperones and their regulators	PcyM_1302200
Genes coding for chaperones and their regulators	PcyM_1238600
Genes coding for chaperones and their regulators	PcyM_0119600
Genes coding for chaperones and their regulators	PcyM_1261400
Genes coding for chaperones and their regulators	PcyM_0720400
Genes coding for chaperones and their regulators	PcyM_0816300
Phosphoproteome -Collins et al 2014	PcyM_0720400
Genes coding for chaperones and their regulators	PcyM_1454800
Genes coding for chaperones and their regulators	PcyM_1214500
Genes coding for chaperones and their regulators	PcyM_1451600
Genes coding for chaperones and their regulators	PcyM_1442300
Genes coding for chaperones and their regulators	PcyM_0909300
Genes coding for chaperones and their regulators	PcyM_1008400
Genes coding for chaperones and their regulators	PcyM_0409800
Genes coding for chaperones and their regulators	PcyM_0830600
Genes coding for chaperones and their regulators	PcyM_0716200
Genes coding for chaperones and their regulators	PcyM_0913900
Genes coding for chaperones and their regulators	PcyM_1128200
Genes coding for chaperones and their regulators	PcyM_1008400
Genes coding for chaperones and their regulators	PcyM_0515400
Genes coding for chaperones and their regulators	PcyM_1280800
Genes coding for chaperones and their regulators	PcyM_0837400
Genes coding for chaperones and their regulators	PcyM_0923900
Genes coding for chaperones and their regulators	PcyM_0836800
Genes coding for chaperones and their regulators	PcyM_0318200
Genes coding for chaperones and their regulators	PcyM_1120900
Genes coding for chaperones and their regulators	PcyM_1349600
Genes coding for chaperones and their regulators	PcyM_1280800
Genes coding for chaperones and their regulators	PcyM_0937100
Genes coding for chaperones and their regulators	PcyM_0838000
Genes coding for chaperones and their regulators	PcyM_1129800
Genes coding for chaperones and their regulators	PcyM_0932700
Genes coding for chaperones and their regulators	PcyM_0930600
Genes coding for chaperones and their regulators	PcyM_0109400
Genes coding for chaperones and their regulators	PcyM_0938800
Genes coding for chaperones and their regulators	PcyM_1116500
Genes coding for chaperones and their regulators	PcyM_1337400
Localization and function of some Hsp40s and Hsp70s	PcyM_0409800
Localization and function of some Hsp40s and Hsp70s	PcyM_1280800
Genes coding for chaperones and their regulators	PcyM_1442300
Genes coding for chaperones and their regulators	PcyM_0928600
Genes coding for chaperones and their regulators	PcyM_0109700
Genes coding for chaperones and their regulators	PcyM_0828300
Genes coding for chaperones and their regulators	PcyM_0109900
Genes coding for chaperones and their regulators	PcyM_0409800
Genes coding for chaperones and their regulators	PcyM_0910700
Genes coding for chaperones and their regulators	PcyM_1115000
Genes coding for chaperones and their regulators	PcyM_1113800
Genes coding for chaperones and their regulators	PcyM_1346000
Genes coding for chaperones and their regulators	PcyM_1341100
Rab GTPase regulation of membrane identity	PcyM_0918900
Genes coding for chaperones and their regulators	PcyM_0515400
Genes coding for chaperones and their regulators	PcyM_0835500
Genes coding for chaperones and their regulators	PcyM_0835900
Genes coding for chaperones and their regulators	PcyM_1333900
Genes coding for chaperones and their regulators	PcyM_0918100
Genes coding for chaperones and their regulators	PcyM_0920700
Genes coding for chaperones and their regulators	PcyM_0938800
Genes coding for chaperones and their regulators	PcyM_0109400
Genes coding for chaperones and their regulators	PcyM_0919300
Nuclear proteome	PcyM_0918800
Genes coding for chaperones and their regulators	PcyM_0716200
Genes coding for chaperones and their regulators	PcyM_0918800
ADP ribosylation factors functions in the secretory pathway	PcyM_0918900
Phosphatases of Plasmodium falciparum and their timed expression	PcyM_1306400
Phosphatases of Plasmodium falciparum and their timed expression	PcyM_1260000
Phosphatases of Plasmodium falciparum and their timed expression	PcyM_1259800
Phosphatases of Plasmodium falciparum and their timed expression	PcyM_0119700
Phosphatases of Plasmodium falciparum and their timed expression	PcyM_0809600
Phosphatases of Plasmodium falciparum and their timed expression	PcyM_0716300
Phosphatases of Plasmodium falciparum and their timed expression	PcyM_1431400
Phosphatases of Plasmodium falciparum and their timed expression	PcyM_1115300
Phosphatases of Plasmodium falciparum and their timed expression	PcyM_1260000
Phosphatases of Plasmodium falciparum and their timed expression	PcyM_1431200
Nuclear proteome	PcyM_1216200
Phosphatases of Plasmodium falciparum and their timed expression	PcyM_0324800
Phosphatases of Plasmodium falciparum and their timed expression	PcyM_0931400
Phosphatases of Plasmodium falciparum and their timed expression	PcyM_0827800
Phosphatases of Plasmodium falciparum and their timed expression	PcyM_1011800
Phosphatases of Plasmodium falciparum and their timed expression	PcyM_1243000
Phosphatases of Plasmodium falciparum and their timed expression	PcyM_1263600
Phosphatases of Plasmodium falciparum and their timed expression	PcyM_0727700
Phosphatases of Plasmodium falciparum and their timed expression	PcyM_0939900
Phosphatases of Plasmodium falciparum and their timed expression	PcyM_0518600
Phosphatases of Plasmodium falciparum and their timed expression	PcyM_1352200
Phosphatases of Plasmodium falciparum and their timed expression	PcyM_1246700
Phosphatases of Plasmodium falciparum and their timed expression	PcyM_0834900
Phosphatases of Plasmodium falciparum and their timed expression	PcyM_1340500
Phosphatases of Plasmodium falciparum and their timed expression	PcyM_1410800
Phosphatases of Plasmodium falciparum and their timed expression	PcyM_1016700
Phosphatases of Plasmodium falciparum and their timed expression	PcyM_1116500
Phosphatases of Plasmodium falciparum and their timed expression	PcyM_1309500
Phosphoproteome -Collins et al 2014	PcyM_1216200
Phosphatases of Plasmodium falciparum and their timed expression	PcyM_1330100
Phosphatases of Plasmodium falciparum and their timed expression	PcyM_1248200
Phosphatases of Plasmodium falciparum and their timed expression	PcyM_0521300
Phosphatases of Plasmodium falciparum and their timed expression	PcyM_0116600
Phosphatases of Plasmodium falciparum and their timed expression	PcyM_1421600
Phosphatases of Plasmodium falciparum and their timed expression	PcyM_1447000
Phosphatases of Plasmodium falciparum and their timed expression	PcyM_0833200
Phosphatases of Plasmodium falciparum and their timed expression	PcyM_0710600
Phosphatases of Plasmodium falciparum and their timed expression	PcyM_1425200
Phosphatases of Plasmodium falciparum and their timed expression	PcyM_0920900
Phosphatases of Plasmodium falciparum and their timed expression	PcyM_0622100
Phosphatases of Plasmodium falciparum and their timed expression	PcyM_0943600
Phosphatases of Plasmodium falciparum and their timed expression	PcyM_1407000
Nuclear proteome	PcyM_1349300
Phosphatases of Plasmodium falciparum and their timed expression	PcyM_0915400
Phosphatases of Plasmodium falciparum and their timed expression	PcyM_0312700
Phosphatases of Plasmodium falciparum and their timed expression	PcyM_1349300
Phosphatases of Plasmodium falciparum and their timed expression	PcyM_1440500
Phosphatases of Plasmodium falciparum and their timed expression	PcyM_1216200
Phosphatases of Plasmodium falciparum and their timed expression	PcyM_1125200
Phosphatases of Plasmodium falciparum and their timed expression	PcyM_0724600
Protein kinase coding genes	PcyM_1449700
Protein kinase coding genes	PcyM_0404500
Protein kinase coding genes	PcyM_0917000
Protein kinase coding genes	PcyM_1219600
Protein kinase coding genes	PcyM_0925100
Protein kinase coding genes	PcyM_0833600
Protein kinase coding genes	PcyM_1314900
Phosphoproteome -Collins et al 2014	PcyM_1021300
Protein kinase coding genes	PcyM_0119300
Protein kinase coding genes	PcyM_1021400
Protein kinase coding genes	PcyM_1463100
Protein kinase coding genes	PcyM_1114800
Protein kinase coding genes	PcyM_1416800
Protein kinase coding genes	PcyM_1220300
Protein kinase coding genes	PcyM_0527500
Protein kinase coding genes	PcyM_1443200
Protein kinase coding genes	PcyM_1453400
Protein kinase coding genes	PcyM_0834500
Protein kinase coding genes	PcyM_1249100
Protein kinase coding genes	PcyM_0910400
Protein kinase coding genes	PcyM_1425500
Protein kinase coding genes	PcyM_1005700
Protein kinase coding genes	PcyM_1417700
Protein kinase coding genes	PcyM_0926600
Protein kinase coding genes	PcyM_0530200
Protein kinase coding genes	PcyM_0916300
Protein kinase coding genes	PcyM_0905500
Protein kinase coding genes	PcyM_0736700
Protein kinase coding genes	PcyM_1431500
Protein kinase coding genes	PcyM_1320700
Protein kinase coding genes	PcyM_1013600
Protein kinase coding genes	PcyM_1218100
Protein kinase coding genes	PcyM_1272900
Protein kinase coding genes	PcyM_1470500
Protein kinase coding genes	PcyM_0316800
Protein kinase coding genes	PcyM_1471100
Protein kinase coding genes	PcyM_1214400
Protein kinase coding genes	PcyM_0725400
Protein kinase coding genes	PcyM_0317800
Protein kinase coding genes	PcyM_1301400
Protein kinase coding genes	PcyM_0725700
Protein kinase coding genes	PcyM_0953200
Protein kinase coding genes	PcyM_1030500
Protein kinase coding genes	PcyM_1270400
Protein kinase coding genes	PcyM_0820100
Protein kinase coding genes	PcyM_1406200
Protein kinase coding genes	PcyM_0319700
Protein kinase coding genes	PcyM_1265300
Protein kinase coding genes	PcyM_0941500
Protein kinase coding genes	PcyM_0409500
Protein kinase coding genes	PcyM_0815100
Protein kinase coding genes	PcyM_0116400
KEOPS complex	PcyM_1021400
Protein kinase coding genes	PcyM_0411300
Characteristics of Plasmodium falciparum export proteins that remodel infected erythrocyte	PcyM_0841300
Characteristics of Plasmodium falciparum export proteins that remodel infected erythrocyte	PcyM_0526400
Characteristics of Plasmodium falciparum export proteins that remodel infected erythrocyte	PcyM_1008400
Characteristics of Plasmodium falciparum export proteins that remodel infected erythrocyte	PcyM_0422500
Characteristics of Plasmodium falciparum export proteins that remodel infected erythrocyte	PcyM_1240800
Characteristics of Plasmodium falciparum export proteins that remodel infected erythrocyte	PcyM_0924700
Characteristics of Plasmodium falciparum export proteins that remodel infected erythrocyte	PcyM_0924800
Characteristics of Plasmodium falciparum export proteins that remodel infected erythrocyte	PcyM_0408500
Characteristics of Plasmodium falciparum export proteins that remodel infected erythrocyte	PcyM_0308500
Characteristics of Plasmodium falciparum export proteins that remodel infected erythrocyte	PcyM_1034300
Characteristics of Plasmodium falciparum export proteins that remodel infected erythrocyte	PcyM_0511100
Characteristics of Plasmodium falciparum export proteins that remodel infected erythrocyte	PcyM_0919300
RNA Degradation Factors	PcyM_0928300
RNA Degradation Factors	PcyM_0312800
RNA Degradation Factors	PcyM_1114600
U6 snRNP role in pre-mRNA splicing	PcyM_0908800
RNA Degradation Factors	PcyM_1265600
RNA Degradation Factors	PcyM_1410500
RNA Degradation Factors	PcyM_1011500
RNA Degradation Factors	PcyM_1272500
RNA Degradation Factors	PcyM_0503900
RNA Degradation Factors	PcyM_0729000
Single Gene/enzyme deletions predicted to cause impairment of metabolic network	PcyM_0729000
RNA Degradation Factors	PcyM_1408500
RNA Degradation Factors	PcyM_1106800
RNA Degradation Factors	PcyM_1112300
RNA Degradation Factors	PcyM_1150100
RNA Degradation Factors	PcyM_1026400
RNA Degradation Factors	PcyM_0908800
RNA Degradation Factors	PcyM_1440500
RNA Degradation Factors	PcyM_1325000
RNA Degradation Factors	PcyM_0320400
RNA Degradation Factors	PcyM_1216200
Nuclear proteome	PcyM_0908800
RNA Degradation Factors	PcyM_1216800
RNA Degradation Factors	PcyM_0707600
RNA Degradation Factors	PcyM_1012400
RNA Degradation Factors	PcyM_0804900
RNA Degradation Factors	PcyM_0514200
RNA Degradation Factors	PcyM_1462500
RNA Degradation Factors	PcyM_0815300
RNA Degradation Factors	PcyM_1225200
RNA Degradation Factors	PcyM_1267900
RNA Degradation Factors	PcyM_1114700
RNA Degradation Factors	PcyM_1309800
RNA Degradation Factors	PcyM_0822700
Phosphoproteome -Collins et al 2014	PcyM_0815300
Phosphoproteome -Collins et al 2014	PcyM_0932800
RNA polymerase I transcribes rRNA	PcyM_1302700
RNA polymerase I transcribes rRNA	PcyM_0841000
RNA polymerase I transcribes rRNA	PcyM_1339600
RNA polymerase I transcribes rRNA	PcyM_0939600
RNA polymerase I transcribes rRNA	PcyM_0932800
RNA polymerase I transcribes rRNA	PcyM_1105900
RNA polymerase I transcribes rRNA	PcyM_0948100
RNA polymerase I transcribes rRNA	PcyM_1027800
RNA polymerase II transcribes mRNA	PcyM_1424700
RNA polymerase II transcribes mRNA	PcyM_1323700
RNA polymerase II transcribes mRNA	PcyM_1242300
RNA polymerase II transcribes mRNA	PcyM_1027800
RNA polymerase II transcribes mRNA	PcyM_0823700
RNA polymerase II transcribes mRNA	PcyM_1467500
RNA polymerase II transcribes mRNA	PcyM_0316600
RNA polymerase II transcribes mRNA	PcyM_0721800
RNA polymerase II transcribes mRNA	PcyM_1406400
RNA polymerase II transcribes mRNA	PcyM_1434000
RNA polymerase II transcribes mRNA	PcyM_0418200
Transcription and processing of snRNAs	PcyM_1118500
RNA polymerase II transcribes mRNA	PcyM_1118500
RNA polymerase II transcribes mRNA	PcyM_0109100
RNA polymerase II transcribes mRNA	PcyM_1409700
RNA polymerase II transcribes mRNA	PcyM_0702000
RNA polymerase II transcribes mRNA	PcyM_0615800
RNA polymerase II transcribes mRNA	PcyM_1140500
RNA polymerase II transcribes mRNA	PcyM_0618700
RNA polymerase II transcribes mRNA	PcyM_1417500
RNA polymerase II transcribes mRNA	PcyM_0712800
RNA polymerase II transcribes mRNA	PcyM_0205800
RNA polymerase II transcribes mRNA	PcyM_1279400
RNA polymerase II transcribes mRNA	PcyM_0309700
RNA polymerase II transcribes mRNA	PcyM_0406600
Phosphoproteome -Collins et al 2014	PcyM_0309700
RNA polymerase II transcribes mRNA	PcyM_1106500
RNA polymerase II transcribes mRNA	PcyM_1025300
Transcription and processing of snRNAs	PcyM_0406600
RNA polymerase II transcribes mRNA	PcyM_1274000
RNA polymerase II transcribes mRNA	PcyM_0206400
RNA polymerase II transcribes mRNA	PcyM_0511700
RNA polymerase II transcribes mRNA	PcyM_1416600
RNA polymerase III transcribes tRNA and 5S rRNA	PcyM_1417500
RNA polymerase III transcribes tRNA and 5S rRNA	PcyM_1266000
RNA polymerase III transcribes tRNA and 5S rRNA	PcyM_1252400
RNA polymerase III transcribes tRNA and 5S rRNA	PcyM_1249400
RNA polymerase III transcribes tRNA and 5S rRNA	PcyM_1229000
RNA polymerase III transcribes tRNA and 5S rRNA	PcyM_1307000
RNA polymerase III transcribes tRNA and 5S rRNA	PcyM_0704200
RNA polymerase III transcribes tRNA and 5S rRNA	PcyM_1415400
RNA polymerase III transcribes tRNA and 5S rRNA	PcyM_1323700
RNA polymerase III transcribes tRNA and 5S rRNA	PcyM_1311300
RNA polymerase III transcribes tRNA and 5S rRNA	PcyM_0526100
RNA polymerase III transcribes tRNA and 5S rRNA	PcyM_1327000
RNA polymerase III transcribes tRNA and 5S rRNA	PcyM_0906500
The structures of RNA polymerases	PcyM_0948100
The structures of RNA polymerases	PcyM_0841000
The structures of RNA polymerases	PcyM_1307000
Nuclear proteome	PcyM_1106500
The structures of RNA polymerases	PcyM_0206400
The structures of RNA polymerases	PcyM_0906500
Single Gene/enzyme deletions predicted to cause impairment of metabolic network	PcyM_1338900
A model for global single-strand break (SSB) repair	PcyM_1434000
Single Gene/enzyme deletions predicted to cause impairment of metabolic network	PcyM_0906600
The structures of RNA polymerases	PcyM_1434000
The structures of RNA polymerases	PcyM_1106500
Nuclear proteome	PcyM_1434000
A model for global single-strand break (SSB) repair	PcyM_0906500
The structures of RNA polymerases	PcyM_1406400
The structures of RNA polymerases	PcyM_1339600
The structures of RNA polymerases	PcyM_1213900
The structures of RNA polymerases	PcyM_1249400
The structures of RNA polymerases	PcyM_1229000
The structures of RNA polymerases	PcyM_0109100
The structures of RNA polymerases	PcyM_0939600
The structures of RNA polymerases	PcyM_1249400
Nuclear proteome	PcyM_1339500
The structures of RNA polymerases	PcyM_0823700
The structures of RNA polymerases	PcyM_0418200
The structures of RNA polymerases	PcyM_0841000
Phosphoproteome -Collins et al 2014	PcyM_0841000
The structures of RNA polymerases	PcyM_0406600
The structures of RNA polymerases	PcyM_0615800
The structures of RNA polymerases	PcyM_0721800
Genes coding for components involved in ribosome assembly	PcyM_1122200
Genes coding for components involved in ribosome assembly	PcyM_1475600
Genes coding for components involved in ribosome assembly	PcyM_1027900
Phosphoproteome -Collins et al 2014	PcyM_1404100
Genes coding for components involved in ribosome assembly	PcyM_1453000
Genes coding for components involved in ribosome assembly	PcyM_1265600
Genes coding for components involved in ribosome assembly	PcyM_1454100
Nuclear proteome	PcyM_1404200
Phosphoproteome -Collins et al 2014	PcyM_1404200
Genes coding for components involved in ribosome assembly	PcyM_0720600
Genes coding for components involved in ribosome assembly	PcyM_1351600
Genes coding for components involved in ribosome assembly	PcyM_1453400
Genes coding for components involved in ribosome assembly	PcyM_1404100
Genes coding for components involved in ribosome assembly	PcyM_1107000
Genes coding for components involved in ribosome assembly	PcyM_1408600
Genes coding for components involved in ribosome assembly	PcyM_1350200
Genes coding for components involved in ribosome assembly	PcyM_0511500
Genes coding for components involved in ribosome assembly	PcyM_1471500
Genes coding for components involved in ribosome assembly	PcyM_1468100
Genes coding for components involved in ribosome assembly	PcyM_1106800
Genes coding for components involved in ribosome assembly	PcyM_1454200
Genes coding for components involved in ribosome assembly	PcyM_0911700
Genes coding for components involved in ribosome assembly	PcyM_0910400
Genes coding for components involved in ribosome assembly	PcyM_1243500
Phosphoproteome -Collins et al 2014	PcyM_1468100
Genes coding for components involved in ribosome assembly	PcyM_1254300
Nuclear proteome	PcyM_1103600
Genes coding for components involved in ribosome assembly	PcyM_0909500
Genes coding for components involved in ribosome assembly	PcyM_1019400
Genes coding for components involved in ribosome assembly	PcyM_1348900
Genes coding for components involved in ribosome assembly	PcyM_1411100
Genes coding for components involved in ribosome assembly	PcyM_1022300
Phosphoproteome -Collins et al 2014	PcyM_1103500
Genes coding for components involved in ribosome assembly	PcyM_0618800
Genes coding for components involved in ribosome assembly	PcyM_1273700
Genes coding for components involved in ribosome assembly	PcyM_0715900
Nuclear proteome	PcyM_0909500
Genes coding for components involved in ribosome assembly	PcyM_1473900
Genes coding for components involved in ribosome assembly	PcyM_1474000
Genes coding for components involved in ribosome assembly	PcyM_1118900
Genes coding for components involved in ribosome assembly	PcyM_1341200
Genes coding for components involved in ribosome assembly	PcyM_1267800
Genes coding for components involved in ribosome assembly	PcyM_1419600
Phosphoproteome -Collins et al 2014	PcyM_1419600
Genes coding for components involved in ribosome assembly	PcyM_0108800
Genes coding for components involved in ribosome assembly	PcyM_0403600
Genes coding for components involved in ribosome assembly	PcyM_0515100
Genes coding for components involved in ribosome assembly	PcyM_1461700
Genes coding for components involved in ribosome assembly	PcyM_0506400
Genes coding for components involved in ribosome assembly	PcyM_0530200
Genes coding for components involved in ribosome assembly	PcyM_0915900
Genes coding for components involved in ribosome assembly	PcyM_0421300
Genes coding for components involved in ribosome assembly	PcyM_0712200
Genes coding for components involved in ribosome assembly	PcyM_0724400
Genes coding for components involved in ribosome assembly	PcyM_0110900
Genes coding for components involved in ribosome assembly	PcyM_1408500
Genes coding for components involved in ribosome assembly	PcyM_1119400
Genes coding for components involved in ribosome assembly	PcyM_0520400
Genes coding for components involved in ribosome assembly	PcyM_1103600
Single Gene/enzyme deletions predicted to cause impairment of metabolic network	PcyM_1103500
Genes coding for components involved in ribosome assembly	PcyM_0512300
Genes coding for components involved in ribosome assembly	PcyM_1251900
Genes coding for components involved in ribosome assembly	PcyM_1313300
Genes coding for components involved in ribosome assembly	PcyM_0606600
Genes coding for components involved in ribosome assembly	PcyM_1240900
Genes coding for components involved in ribosome assembly	PcyM_1322900
Genes coding for components involved in ribosome assembly	PcyM_0120300
Genes coding for components involved in ribosome assembly	PcyM_0829000
Nuclear proteome	PcyM_1223800
Phosphoproteome -Collins et al 2014	PcyM_0120300
Single Gene/enzyme deletions predicted to cause impairment of metabolic network	PcyM_0120100
Genes coding for components involved in ribosome assembly	PcyM_0616800
Phosphoproteome -Collins et al 2014	PcyM_1223900
Genes coding for components involved in ribosome assembly	PcyM_1223900
Genes coding for components involved in ribosome assembly	PcyM_1003600
Genes coding for components involved in ribosome assembly	PcyM_0414000
Genes coding for components involved in ribosome assembly	PcyM_0809200
Genes coding for components involved in ribosome assembly	PcyM_0927700
Genes coding for components involved in ribosome assembly	PcyM_0621100
Genes coding for components involved in ribosome assembly	PcyM_1321000
Genes coding for components involved in ribosome assembly	PcyM_0808400
Genes coding for components involved in ribosome assembly	PcyM_1437500
Genes coding for components involved in ribosome assembly	PcyM_1224800
Genes coding for components involved in ribosome assembly	PcyM_1224900
Genes coding for components involved in ribosome assembly	PcyM_0415400
Genes coding for components involved in ribosome assembly	PcyM_1318700
Genes coding for components involved in ribosome assembly	PcyM_1005300
Genes coding for components involved in ribosome assembly	PcyM_0311700
Genes coding for components involved in ribosome assembly	PcyM_1440600
Genes coding for components involved in ribosome assembly	PcyM_0924800
Genes coding for components involved in ribosome assembly	PcyM_1007300
Genes coding for components involved in ribosome assembly	PcyM_0312800
Genes coding for components involved in ribosome assembly	PcyM_0121200
Genes coding for components involved in ribosome assembly	PcyM_1446400
Genes coding for components involved in ribosome assembly	PcyM_0616700
Genes coding for components involved in ribosome assembly	PcyM_1325000
Genes coding for components involved in ribosome assembly	PcyM_0734500
Genes coding for components involved in ribosome assembly	PcyM_0606000
Genes coding for components involved in ribosome assembly	PcyM_0516500
Genes coding for components involved in ribosome assembly	PcyM_0322900
Genes coding for components involved in ribosome assembly	PcyM_1138300
Genes coding for components involved in ribosome assembly	PcyM_1208000
Genes coding for components involved in ribosome assembly	PcyM_0608500
Genes coding for components involved in ribosome assembly	PcyM_0943600
Genes coding for components involved in ribosome assembly	PcyM_0321700
Genes coding for components involved in ribosome assembly	PcyM_1133900
Genes coding for components involved in ribosome assembly	PcyM_1335100
Genes coding for components involved in ribosome assembly	PcyM_0933900
Genes coding for components involved in ribosome assembly	PcyM_1330800
Genes coding for components involved in ribosome assembly	PcyM_1335400
Genes coding for components involved in ribosome assembly	PcyM_0951100
Genes coding for components involved in ribosome assembly	PcyM_0707600
Genes coding for components involved in ribosome assembly	PcyM_0515500
Genes coding for components involved in ribosome assembly	PcyM_1336800
Genes coding for components involved in ribosome assembly	PcyM_0218500
Genes coding for components involved in ribosome assembly	PcyM_1117800
Genes coding for components involved in ribosome assembly	PcyM_1306600
Genes coding for components involved in ribosome assembly	PcyM_0218600
Genes coding for components involved in ribosome assembly	PcyM_0615500
Genes coding for components involved in ribosome assembly	PcyM_0813700
Genes coding for components involved in ribosome assembly	PcyM_1150100
Genes coding for components involved in ribosome assembly	PcyM_1220100
Genes coding for components involved in ribosome assembly	PcyM_0928700
Genes coding for components involved in ribosome assembly	PcyM_1002700
Genes coding for components involved in ribosome assembly	PcyM_0313100
Genes coding for components involved in ribosome assembly	PcyM_1010300
Genes coding for components involved in ribosome assembly	PcyM_1263400
Genes coding for components involved in ribosome assembly	PcyM_1112200
Genes coding for components involved in ribosome assembly	PcyM_1231100
Genes coding for components involved in ribosome assembly	PcyM_1448200
Genes coding for components involved in ribosome assembly	PcyM_0607000
Genes coding for components involved in ribosome assembly	PcyM_0921100
Genes coding for components involved in ribosome assembly	PcyM_0703900
Genes coding for components involved in ribosome assembly	PcyM_1447700
Genes coding for components involved in ribosome assembly	PcyM_1338800
Genes coding for components involved in ribosome assembly	PcyM_1449300
Genes coding for components involved in ribosome assembly	PcyM_1113900
Genes coding for components involved in ribosome assembly	PcyM_1246100
SCF (Skp1-Cullin-F-box) ubiquitin-ligase	PcyM_0719700
Phosphoproteome -Collins et al 2014	PcyM_1462500
SCF (Skp1-Cullin-F-box) ubiquitin-ligase	PcyM_1462300
Phosphoproteome -Collins et al 2014	PcyM_1462300
Nuclear proteome	PcyM_1462300
SCF (Skp1-Cullin-F-box) ubiquitin-ligase	PcyM_0520700
SCF (Skp1-Cullin-F-box) ubiquitin-ligase	PcyM_1446700
SCF (Skp1-Cullin-F-box) ubiquitin-ligase	PcyM_1028200
SCF (Skp1-Cullin-F-box) ubiquitin-ligase	PcyM_0822800
SCF (Skp1-Cullin-F-box) ubiquitin-ligase	PcyM_1120100
SCF (Skp1-Cullin-F-box) ubiquitin-ligase	PcyM_1468700
SCF (Skp1-Cullin-F-box) ubiquitin-ligase	PcyM_1416500
SCF (Skp1-Cullin-F-box) ubiquitin-ligase	PcyM_1430700
SCF (Skp1-Cullin-F-box) ubiquitin-ligase	PcyM_0519000
SCF (Skp1-Cullin-F-box) ubiquitin-ligase	PcyM_0734900
SCF (Skp1-Cullin-F-box) ubiquitin-ligase	PcyM_0734900
SCF (Skp1-Cullin-F-box) ubiquitin-ligase	PcyM_1414700
SCF (Skp1-Cullin-F-box) ubiquitin-ligase	PcyM_1104200
SCF (Skp1-Cullin-F-box) ubiquitin-ligase	PcyM_0927000
One-carbon enzyme systems serine hydroxymethyltransferase and glycine-cleavage complex	PcyM_1458900
One-carbon enzyme systems serine hydroxymethyltransferase and glycine-cleavage complex	PcyM_0937800
One-carbon enzyme systems serine hydroxymethyltransferase and glycine-cleavage complex	PcyM_1263000
One-carbon enzyme systems serine hydroxymethyltransferase and glycine-cleavage complex	PcyM_0937800
One-carbon enzyme systems serine hydroxymethyltransferase and glycine-cleavage complex	PcyM_1454900
One-carbon enzyme systems serine hydroxymethyltransferase and glycine-cleavage complex	PcyM_1257400
One-carbon enzyme systems serine hydroxymethyltransferase and glycine-cleavage complex	PcyM_1212500
One-carbon enzyme systems serine hydroxymethyltransferase and glycine-cleavage complex	PcyM_1430500
Signal recognition particle-mediated targeting of membrane and secretory proteins	PcyM_0413200
Signal recognition particle-mediated targeting of membrane and secretory proteins	PcyM_1303000
Signal recognition particle-mediated targeting of membrane and secretory proteins	PcyM_1436600
Signal recognition particle-mediated targeting of membrane and secretory proteins	PcyM_1128600
Nuclear proteome	PcyM_0218200
Signal recognition particle-mediated targeting of membrane and secretory proteins	PcyM_0941400
Signal recognition particle-mediated targeting of membrane and secretory proteins	PcyM_1104700
Signal recognition particle-mediated targeting of membrane and secretory proteins	PcyM_1470400
Signal recognition particle-mediated targeting of membrane and secretory proteins	PcyM_1335400
Signal recognition particle-mediated targeting of membrane and secretory proteins	PcyM_0218200
Signal recognition particle-mediated targeting of membrane and secretory proteins	PcyM_1210300
Signal recognition particle-mediated targeting of membrane and secretory proteins	PcyM_1265200
Putative SUMO substrates	PcyM_0618800
Putative SUMO substrates	PcyM_0715900
Putative SUMO substrates	PcyM_1454200
Putative SUMO substrates	PcyM_1349000
Putative SUMO substrates	PcyM_0841300
Putative SUMO substrates	PcyM_1424500
Putative SUMO substrates	PcyM_1302200
Maturation of snRNAs requires nuclear and cytoplasmic regulatory steps	PcyM_1302300
Putative SUMO substrates	PcyM_1107000
Putative Golgi disassembly and reassembly mechanisms	PcyM_0841300
Putative SUMO substrates	PcyM_1314700
Putative SUMO substrates	PcyM_1318400
Putative SUMO substrates	PcyM_0906800
Putative SUMO substrates	PcyM_0626900
Putative SUMO substrates	PcyM_0950500
Putative SUMO substrates	PcyM_0804700
Putative SUMO substrates	PcyM_1228600
Putative SUMO substrates	PcyM_0310800
Putative SUMO substrates	PcyM_0941900
Post-translational modification SUMOylation	PcyM_0809500
Post-translational modification SUMOylation	PcyM_1461000
Post-translational modification SUMOylation	PcyM_1110800
Post-translational modification SUMOylation	PcyM_0949400
Post-translational modification SUMOylation	PcyM_0713300
Crosstalk between ubiquitination and SUMOylation	PcyM_0713300
Mechanism of ubiquitin transfer	PcyM_0949400
Post-translational modification SUMOylation	PcyM_1028200
Terpenoid metabolism	PcyM_1273400
Terpenoid metabolism	PcyM_1460800
Terpenoid metabolism	PcyM_0952600
Terpenoid metabolism	PcyM_0952700
Terpenoid metabolism	PcyM_0422300
Terpenoid metabolism	PcyM_1434600
Terpenoid metabolism	PcyM_1434700
Terpenoid metabolism	PcyM_0933000
Terpenoid metabolism	PcyM_0507000
Terpenoid metabolism	PcyM_1149700
Terpenoid metabolism	PcyM_0825700
Terpenoid metabolism	PcyM_1465900
Terpenoid metabolism	PcyM_1308200
Single Gene/enzyme deletions predicted to cause impairment of metabolic network	PcyM_0933000
Terpenoid metabolism	PcyM_0933000
Terpenoid metabolism	PcyM_1128300
Topogenesis of the Rieske FeS protein	PcyM_0735400
Topogenesis of the Rieske FeS protein	PcyM_1276700
Topogenesis of the Rieske FeS protein	PcyM_1148800
Topogenesis of the Rieske FeS protein	PcyM_1250100
Topogenesis of the Rieske FeS protein	PcyM_1413400
Topogenesis of the Rieske FeS protein	PcyM_1008700
Topogenesis of the Rieske FeS protein	PcyM_1326100
Topogenesis of the Rieske FeS protein	PcyM_0812900
Topogenesis of the Rieske FeS protein	PcyM_1352000
Topogenesis of the Rieske FeS protein	PcyM_1220400
Phosphoproteome -Collins et al 2014	PcyM_1313400
Phosphoproteome -Collins et al 2014	PcyM_1278000
Phosphoproteome -Collins et al 2014	PcyM_1313300
SRP independent translocation of GPI anchored proteins	PcyM_1313400
SRP independent translocation of GPI anchored proteins	PcyM_0523000
SRP independent translocation of GPI anchored proteins	PcyM_0409800
Localization and function of some Hsp40s and Hsp70s	PcyM_1313400
SRP independent translocation of GPI anchored proteins	PcyM_1210300
SRP independent translocation of GPI anchored proteins	PcyM_0413200
SRP independent translocation of GPI anchored proteins	PcyM_1420600
Nuclear proteome	PcyM_1313300
SRP independent translocation of GPI anchored proteins	PcyM_0311900
SRP independent translocation of GPI anchored proteins	PcyM_1278000
SRP independent translocation of GPI anchored proteins	PcyM_1280800
Acetylation recognition by the bromodomain and other modules	PcyM_1141000
Acetylation recognition by the bromodomain and other modules	PcyM_1223800
Acetylation recognition by the bromodomain and other modules	PcyM_0623200
Acetylation recognition by the bromodomain and other modules	PcyM_0516800
Acetylation recognition by the bromodomain and other modules	PcyM_1109300
Acetylation recognition by the bromodomain and other modules	PcyM_0724900
Acetylation recognition by the bromodomain and other modules	PcyM_1330900
Acetylation recognition by the bromodomain and other modules	PcyM_0906800
Acetylation recognition by the bromodomain and other modules	PcyM_1280000
Acetylation recognition by the bromodomain and other modules	PcyM_1433300
Acetylation recognition by the bromodomain and other modules	PcyM_1132800
Nuclear proteome	PcyM_0736700
The ubiquitylation machineries of the ER for misfolded secretory proteins	PcyM_0736600
Phosphoproteome -Collins et al 2014	PcyM_0736700
The acidocalcisome	PcyM_1405700
The acidocalcisome	PcyM_0609400
Phosphoproteome -Collins et al 2014	PcyM_0609600
The acidocalcisome	PcyM_0937700
The acidocalcisome	PcyM_1452600
The acidocalcisome	PcyM_0937400
Phosphoproteome -Collins et al 2014	PcyM_0609400
Proteasome-mediated degradation of non-native ER proteins	PcyM_0736600
The acidocalcisome	PcyM_1408100
The acidocalcisome	PcyM_1354100
The acidocalcisome	PcyM_0736400
The acidocalcisome	PcyM_1142600
The acidocalcisome	PcyM_1256600
The acidocalcisome	PcyM_0944800
The acidocalcisome	PcyM_1236200
The acidocalcisome	PcyM_1215900
The acidocalcisome	PcyM_1458500
The acidocalcisome	PcyM_1017100
The acidocalcisome	PcyM_1312800
The acidocalcisome	PcyM_1325200
The acidocalcisome	PcyM_1214900
The acidocalcisome	PcyM_1128200
The acidocalcisome	PcyM_1117700
The acidocalcisome	PcyM_0211500
The acidocalcisome	PcyM_1248100
The acidocalcisome	PcyM_1240700
The acidocalcisome	PcyM_1413600
The acidocalcisome	PcyM_1426100
The acidocalcisome	PcyM_0413500
The acidocalcisome	PcyM_0308400
The acidocalcisome	PcyM_0825700
The acidocalcisome	PcyM_0115100
The acidocalcisome	PcyM_0923300
The acidocalcisome	PcyM_1120500
The acidocalcisome	PcyM_1012800
The acidocalcisome	PcyM_1148500
Actin and filaments	PcyM_1331000
Actin and filaments	PcyM_1014700
Actin and filaments	PcyM_0912700
Actin and filaments	PcyM_0212400
Actin and filaments	PcyM_0905400
Actin and filaments	PcyM_0912700
Putative Golgi disassembly and reassembly mechanisms	PcyM_1470500
Actin and filaments	PcyM_0733500
Actin and filaments	PcyM_1110000
Nuclear proteome	PcyM_0806700
Phosphoproteome -Collins et al 2014	PcyM_0806700
Actin and filaments	PcyM_1259800
Actin and filaments	PcyM_1352300
Actin and filaments	PcyM_1127200
Actin and filaments	PcyM_0312500
Subcellular location of exported proteins	PcyM_0312600
Phosphoproteome -Collins et al 2014	PcyM_0312700
Actin and filaments	PcyM_0806700
Nuclear proteome	PcyM_1028900
Actin and filaments	PcyM_1028900
Actin and filaments	PcyM_1475300
Actin and filaments	PcyM_0834900
Actin and filaments	PcyM_1469700
Actin and filaments	PcyM_1030600
Actin and filaments	PcyM_1235000
Actin and filaments	PcyM_0217400
Actin and filaments	PcyM_1470500
Actin and filaments	PcyM_1219600
Actin and filaments	PcyM_1003000
Actin and filaments	PcyM_0404500
Proteins targeted by the thioredoxin superfamily enzymes	PcyM_1469700
Actin and filaments	PcyM_1469700
Actin and filaments	PcyM_0709000
Actin and filaments	PcyM_0214100
Modification of proteins by adenylylation and ADP-ribosylation	PcyM_1018500
Modification of proteins by adenylylation and ADP-ribosylation	PcyM_0804400
Modification of proteins by adenylylation and ADP-ribosylation	PcyM_1148300
Modification of proteins by adenylylation and ADP-ribosylation	PcyM_0815900
Modification of proteins by adenylylation and ADP-ribosylation	PcyM_1445600
Modification of proteins by adenylylation and ADP-ribosylation	PcyM_1445900
Modification of proteins by adenylylation and ADP-ribosylation	PcyM_0317000
Modification of proteins by adenylylation and ADP-ribosylation	PcyM_1024100
Modification of proteins by adenylylation and ADP-ribosylation	PcyM_1006500
Modification of proteins by adenylylation and ADP-ribosylation	PcyM_1127700
Modification of proteins by adenylylation and ADP-ribosylation	PcyM_1439000
Modification of proteins by adenylylation and ADP-ribosylation	PcyM_0624900
Modification of proteins by adenylylation and ADP-ribosylation	PcyM_1121300
Modification of proteins by adenylylation and ADP-ribosylation	PcyM_1434100
Modification of proteins by adenylylation and ADP-ribosylation	PcyM_1436300
Modification of proteins by adenylylation and ADP-ribosylation	PcyM_0113600
Modification of proteins by adenylylation and ADP-ribosylation	PcyM_1133900
Modification of proteins by adenylylation and ADP-ribosylation	PcyM_0905800
Modification of proteins by adenylylation and ADP-ribosylation	PcyM_0920100
Modification of proteins by adenylylation and ADP-ribosylation	PcyM_1475800
Modification of proteins by adenylylation and ADP-ribosylation	PcyM_1454700
Modification of proteins by adenylylation and ADP-ribosylation	PcyM_0724500
Modification of proteins by adenylylation and ADP-ribosylation	PcyM_0930300
Modification of proteins by adenylylation and ADP-ribosylation	PcyM_0712100
Modification of proteins by adenylylation and ADP-ribosylation	PcyM_1131100
Modification of proteins by adenylylation and ADP-ribosylation	PcyM_1463000
Modification of proteins by adenylylation and ADP-ribosylation	PcyM_0735900
Modification of proteins by adenylylation and ADP-ribosylation	PcyM_0505000
Modification of proteins by adenylylation and ADP-ribosylation	PcyM_0215200
Modification of proteins by adenylylation and ADP-ribosylation	PcyM_1207000
Modification of proteins by adenylylation and ADP-ribosylation	PcyM_1270700
Modification of proteins by adenylylation and ADP-ribosylation	PcyM_1250900
Modification of proteins by adenylylation and ADP-ribosylation	PcyM_1220500
Modification of proteins by adenylylation and ADP-ribosylation	PcyM_1103500
Modification of proteins by adenylylation and ADP-ribosylation	PcyM_1314600
Modification of proteins by adenylylation and ADP-ribosylation	PcyM_0207400
Modification of proteins by adenylylation and ADP-ribosylation	PcyM_1206100
Modification of proteins by adenylylation and ADP-ribosylation	PcyM_0411200
Modification of proteins by adenylylation and ADP-ribosylation	PcyM_0832000
Modification of proteins by adenylylation and ADP-ribosylation	PcyM_1414900
Modification of proteins by adenylylation and ADP-ribosylation	PcyM_0407300
Modification of proteins by adenylylation and ADP-ribosylation	PcyM_0407300
Modification of proteins by adenylylation and ADP-ribosylation	PcyM_1405600
Modification of proteins by adenylylation and ADP-ribosylation	PcyM_1114500
Modification of proteins by adenylylation and ADP-ribosylation	PcyM_1224700
Modification of proteins by adenylylation and ADP-ribosylation	PcyM_0407300
Modification of proteins by adenylylation and ADP-ribosylation	PcyM_0407300
Modification of proteins by adenylylation and ADP-ribosylation	PcyM_0407300
Modification of proteins by adenylylation and ADP-ribosylation	PcyM_0407300
Modification of proteins by adenylylation and ADP-ribosylation	PcyM_1225800
Modification of proteins by adenylylation and ADP-ribosylation	PcyM_1333600
Modification of proteins by adenylylation and ADP-ribosylation	PcyM_0407300
Modification of proteins by adenylylation and ADP-ribosylation	PcyM_0407300
Modification of proteins by adenylylation and ADP-ribosylation	PcyM_0407300
Modification of proteins by adenylylation and ADP-ribosylation	PcyM_1337500
Asparagine and Aspartate metabolism	PcyM_1211700
Asparagine and Aspartate metabolism	PcyM_1018500
Asparagine and Aspartate metabolism	PcyM_0420300
Asparagine and Aspartate metabolism	PcyM_0215200
Asparagine and Aspartate metabolism	PcyM_1024100
Asparagine and Aspartate metabolism	PcyM_0411200
Nuclear proteome	PcyM_0215200
Asparagine and Aspartate metabolism	PcyM_0834200
Asparagine and Aspartate metabolism	PcyM_1117400
Aminosugars metabolism	PcyM_0820500
Aminosugars metabolism	PcyM_1212900
Aminosugars metabolism	PcyM_0934500
Aminosugars metabolism	PcyM_0612600
Aminosugars metabolism	PcyM_0115600
Aminosugars metabolism	PcyM_0718000
Aminosugars metabolism	PcyM_0919100
Aminosugars metabolism	PcyM_0411400
Single Gene/enzyme deletions predicted to cause impairment of metabolic network	PcyM_0718000
Mitochondrial antioxidant system	PcyM_0520500
Mitochondrial antioxidant system	PcyM_0722500
Mitochondrial antioxidant system	PcyM_1454900
Mitochondrial antioxidant system	PcyM_0839800
Mitochondrial antioxidant system	PcyM_0840600
Mitochondrial antioxidant system	PcyM_0218400
Mitochondrial antioxidant system	PcyM_1416300
Mitochondrial antioxidant system	PcyM_1210700
Mitochondrial antioxidant system	PcyM_1334400
Mitochondrial antioxidant system	PcyM_1435300
Mitochondrial antioxidant system	PcyM_0509600
Mitochondrial antioxidant system	PcyM_1211300
Nuclear proteome	PcyM_1280000
The ubiquitylation machineries of the ER for misfolded secretory proteins	PcyM_1279900
Mitochondrial antioxidant system	PcyM_1279900
Mitochondrial antioxidant system	PcyM_1313000
[truncated: 8,392 more rows]
