# Supplementary material for: A comparative transcriptomic analysis of replicating and dormant liver stages of the relapsing malaria parasite Plasmodium cynomolgi
Source: eLife. 2017 Dec 7;6:e29605. doi: 10.7554/eLife.29605 (PMC5758109; doi:10.7554/eLife.29605)
Supplement: Supplementary file 8. — Gene sets from the Gene Ontology (GO) and PlasmoDB were used and mapped to P. cynomologi identifiers. p is the adjusted p-value (Benjamini-Hochberg), related to Figure 3 [file elife-29605-supp8.xlsx]

## Sheet: Sheet1
Supplementary File 8: Enrichment for expressed genes in the hypnozoite samples (Hz) with different criteria to consider genes expressed. Gene sets from the Gene Ontology (GO) and PlasmoDB were used and mapped to P cynomologi identifiers. p is the adjusted p-value (Benjamini-Hochberg), related to Figure 3
stage	category	set_id	p
Hz	GO	RNA binding	0.003
Hz	GO	cytosolic large ribosomal subunit	0.006
Hz	GO	mRNA splicing, via spliceosome	0.02
Hz	GO	Translation	0.037
Hz	PlasmoDB	Nuclear proteome	0
Hz	PlasmoDB	Ribosomal structure	0
Hz	PlasmoDB	Nuclear genes with mitochondrial signal sequences	0.003
Hz	PlasmoDB	mRNA degradation	0.02
Hz	PlasmoDB	Phosphoproteome - Treeck et al 2011	0.02
Hz_q1	PlasmoDB	Ribosomal structure	0
Hz_q1	PlasmoDB	Nuclear proteome	0.001
Hz_q3	GO	Translation	0.001
Hz_q3	GO	cytosolic large ribosomal subunit	0.009
Hz_q3	GO	RNA binding	0.009
Hz_q3	PlasmoDB	Nuclear proteome	0
Hz_q3	PlasmoDB	Ribosomal structure	0
Hz_q3	PlasmoDB	Nuclear genes with mitochondrial signal sequences	0.001
Hz_q3	PlasmoDB	Transcription related proteins encoding genes	0.013
Hz_q3	PlasmoDB	Genes coding for components involved in ribosome assembly	0.021
Hz_q3	PlasmoDB	Phosphoproteome - Treeck et al 2011	0.021
Hz_q3	PlasmoDB	U6 snRNP role in pre-mRNA splicing	0.03
Hz_q3	PlasmoDB	mRNA degradation	0.04
Hz_q3	PlasmoDB	RNA polymerase II transcribes mRNA	0.04
Hz_q3	PlasmoDB	Plasmodium falciparum histone acetylation and methylation	0.045
