# Supplementary material for: A comparative transcriptomic analysis of replicating and dormant liver stages of the relapsing malaria parasite Plasmodium cynomolgi
Source: eLife. 2017 Dec 7;6:e29605. doi: 10.7554/eLife.29605 (PMC5758109; doi:10.7554/eLife.29605)
Supplement: Supplementary file 9. — Gene sets from the Gene Ontology (GO) and PlasmoDB were used and mapped to P. cynomologi identifiers. p is the adjusted p-value (Benjamini-Hochberg), related to Figure 3 [file elife-29605-supp9.xlsx]

## Sheet: Sheet1
Supplementary File 9: Enrichment for genes expressed in the schizont samples (Sz). Gene sets from the Gene Ontology (GO) and PlasmoDB were used and mapped to P. cynomologi identifiers. p is the adjusted p-value (Benjamini-Hochberg), related to Figure 3
stage	category	set_id	p
Sz_q3	GO	translation	0
Sz_q3	GO	cytosolic large ribosomal subunit	0.001
Sz_q3	GO	RNA binding	0.001
Sz_q3	GO	structural constituent of ribosome	0.007
Sz_q3	GO	nucleus	0.008
Sz_q3	GO	ribosomal small subunit assembly	0.026
Sz_q3	PlasmoDB	Nuclear proteome	0
Sz_q3	PlasmoDB	Ribosomal structure	0
Sz_q3	PlasmoDB	S-nitrosylated proteins	0
Sz_q3	PlasmoDB	Nuclear genes with mitochondrial signal sequences	0
Sz_q3	PlasmoDB	Nuclear genes with apicoplast signal sequences	0
Sz_q3	PlasmoDB	Total palmitome of Plasmodium falciparum	0
Sz_q3	PlasmoDB	Phosphoproteome - Treeck et al 2011	0
Sz_q3	PlasmoDB	Transcription related proteins encoding genes	0
Sz_q3	PlasmoDB	Single Gene/enzyme deletions predicted to cause impairment of metabolic network	0.001
Sz_q3	PlasmoDB	S-Glutathionylated proteins	0.001
Sz_q3	PlasmoDB	Phosphoproteome -Collins et al 2014	0.001
Sz_q3	PlasmoDB	Compartmentation of redox metabolism	0.001
Sz_q3	PlasmoDB	Plasmodium falciparum histone acetylation and methylation	0.002
Sz_q3	PlasmoDB	mRNA degradation	0.003
Sz_q3	PlasmoDB	Genes coding for components of the proteasome degradation machinery & their timed transcription	0.003
Sz_q3	PlasmoDB	Histone acetylation	0.007
Sz_q3	PlasmoDB	Mitochondrial antioxidant system	0.007
Sz_q3	PlasmoDB	U6 snRNP role in pre-mRNA splicing	0.007
Sz_q3	PlasmoDB	Methionine and Polyamine metabolism	0.008
Sz_q3	PlasmoDB	Redox Metabolism	0.008
Sz_q3	PlasmoDB	Thioredoxin, Glutaredoxin and Peroxiredoxin	0.014
Sz_q3	PlasmoDB	Proteins targeted by the thioredoxin superfamily enzymes	0.023
Sz_q3	PlasmoDB	Genes coding for components involved in ribosome assembly	0.026
Sz_q3	PlasmoDB	Telomerase and some telomerase associated proteins	0.028
Sz_q3	PlasmoDB	Genes coding for transport proteins	0.028
Sz_q3	PlasmoDB	Thiamine metabolism	0.031
Sz_q3	PlasmoDB	RNA Degradation Factors	0.044
