# Supplementary material for: A comparative transcriptomic analysis of replicating and dormant liver stages of the relapsing malaria parasite Plasmodium cynomolgi
Source: eLife. 2017 Dec 7;6:e29605. doi: 10.7554/eLife.29605 (PMC5758109; doi:10.7554/eLife.29605)
Supplement: Supplementary file 10. [file elife-29605-supp10.xlsx]

## Sheet: Supplementary Table S8
Supplementary File 10: Gene expression values (>1 FPKM after host normalization) for putative transporters generated by RNA-seq of hypnozoite (Hz) and schizont (Sz) samples, related to Figure 4
Gene Id	Sz-1	Sz-2	Sz-3	Hz-1	Hz-2	Hz-3	Hz-4	Average FPKM Sz	Average FPKM Hz	P. vivax Gene ID, Description
PcyM_1120500	367.365	392.872	305.735	32.4575	9.38821	27.7853	84.2025	355.324	38.4584	PVX_114575, transmembrane amino acid transporter protein, putative
PcyM_1426000	301.826	402.684	381.499	29.9319	23.1765	41.0859	48.7542	362.003	35.7371	PVX_122995, transporter, putative (DMT1)
PcyM_0213000	82.601	44.2329	255.095	4.08925	0.706849	70.1997	0.066617	127.31	18.7656	PVX_081520, transporter, putative (MFR2)
PcyM_1331900	328.238	331.409	259.539	11.9764	9.74983	5.51811	24.3607	306.395	12.9013	PVX_085385, copper transporter, putative (CTR2)
PcyM_0841900	230.475	389.036	240.006	17.2936	0.20747	21.2226	9.07243	286.506	11.949	PVX_119255, ABC transporter B family member 4, putative (ABCB4)
PcyM_1426100	76.2113	94.5326	71.2659	14.1391	8.20069	11.859	9.91106	80.67	11.0275	PVX_123000, cation diffusion facilitator transporter domain containing protein (CDF)
PcyM_1259900	25.4614	49.8759	27.7356	7.81815	11.4377	3.99255	19.0011	34.3576	10.5624	PVX_117725, MFS-type transporter, putative
PcyM_1427800	139.744	132.829	279.928	12.8896	8.2827	0.722486	16.4466	184.167	9.58534	PVX_123085, ABC transporter F family member 1, putative (ABCF1)
PcyM_0950600	16.2079	8.66726	52.3589	0.887825	1.47646	1.39141	28.1844	25.7447	7.98503	PVX_092880, ABC transporter B family member 3, putative (ABCB3)
PcyM_1277100	86.5802	28.3297	380.138	1.19978	0.0983302	1.0421	22.1203	165.016	6.11513	PVX_118540, copper transporter, putative (CTR1)
PcyM_1310500	107.035	125.112	22.8851	2.95036	5.1793	10.8033	4.48764	85.0105	5.85515	PVX_084521, ABC transporter B family member 7, putative (ABCB7)
PcyM_0509100	41.204	55.3327	4.31907	0.0769286	0.251406	0.0959167	19.8502	33.6186	5.06861	PVX_089140, nucleoside transporter 2, putative (NT2)
PcyM_1240700	165.747	142.474	610.486	2.14791	5.65503	0.307188	11.7344	306.236	4.96113	PVX_116910, sulfate transporter, putative
PcyM_0714200	44.7585	22.3919	16.4538	2.96912	5.90135	10.4702	0.0166092	27.868	4.83932	PVX_099230, sugar transporter, putative (MFS2)
PcyM_0915700	68.6095	69.3272	114.21	5.32421	1.01244	2.36956	6.95915	84.0488	3.91634	PVX_091310, UDP-galactose transporter, putative
PcyM_0214900	424.28	405.648	344.227	4.9635	5.20445	3.39175	2.07205	391.385	3.90794	PVX_081595, nucleoside transporter 4 (NT4)
PcyM_0726100	186.036	149.009	340.447	1.77681	2.15727	4.59053	6.07147	225.164	3.64902	PVX_099745, monocarboxylate transporter, putative
PcyM_0412900	72.127	52.6268	0.78809	11.317	1.88032	0.280589	1.11622	41.8473	3.64854	PVX_003965, monocarboxylate transporter, putative
PcyM_0413500	11.6765	5.99957	8.68505	11.2484	0.359177	0.035063	1.17309	8.78704	3.20393	PVX_003935, amine transporter, putative
PcyM_1142600	7.74128	15.0574	3.49458	0.130824	0.125199	0.193112	11.5967	8.76441	3.01147	PVX_113615, transporter protein, putative
PcyM_1309000	23.6561	32.6845	34.3035	0.0706413	0.403254	5.03532	5.51921	30.2147	2.75711	PVX_084455, amino acid transporter, putative
PcyM_0934400	75.5309	58.7242	106.312	5.60715	1.74593	1.16548	2.15615	80.1892	2.66868	PVX_092105, transporter, putative (MFR5)
PcyM_0420100	15.9818	88.6599	0.140153	7.33769	0.406951	0.29697	2.46866	34.9273	2.62757	PVX_003665, hexose transporter
PcyM_1203900	74.9475	71.2119	70.5221	1.19322	7.76498	0.111583	0.569835	72.2271	2.4099	PVX_083495, ABC transporter B family member 6, putative (ABCB6)
PcyM_0609400	133.624	35.2559	1037.07	0.818969	2.53994	5.84713	0.244354	401.982	2.3626	PVX_001980, ZIP domain-containing protein, putative (ZIPCO)
PcyM_1326600	6.54553	16.9494	3.63942	1.91127	0.697348	6.11269	0.106282	9.0448	2.2069	PVX_085205, ABC transporter G family member 2, putative (ABCG2)
PcyM_1209200	27.9498	22.0029	56.8858	7.26761	0.788879	0.257413	0.497541	35.6128	2.20286	PVX_083260, nucleoside transporter 1, putative (NT1)
PcyM_0212800	9.78782	7.94003	11.1106	0.274055	6.88205	0.870093	0.178233	9.61283	2.05111	PVX_081515, transporter, putative
PcyM_0830100	39.8689	64.6096	7.16641	0.0992278	3.6191	0.138214	1.44962	37.215	1.32654	PVX_119735, transporter, putative
PcyM_1324400	39.2149	35.6546	4.48203	1.57085	1.82171	0.151185	0.930607	26.4505	1.11859	PVX_085130, transporter, putative
PcyM_1215900	4.58464	10.7956	0.0294709	0.0321672	0.0718783	0.0738118	4.17484	5.13658	1.08817	PVX_082960, sodium-dependent phosphate transporter, putative (PiT)
PcyM_1444100	117.507	109.124	223.991	0.554475	3.33979	0.102776	0.0602516	150.207	1.01432	PVX_123815, iron transporter, putative
