# Supplementary figures and images for: A comparative transcriptomic analysis of replicating and dormant liver stages of the relapsing malaria parasite Plasmodium cynomolgi
Source: eLife journal article supplement (doi:10.7554/elife.29605), 2017-12-07

Figure 1 - figure supplement 2

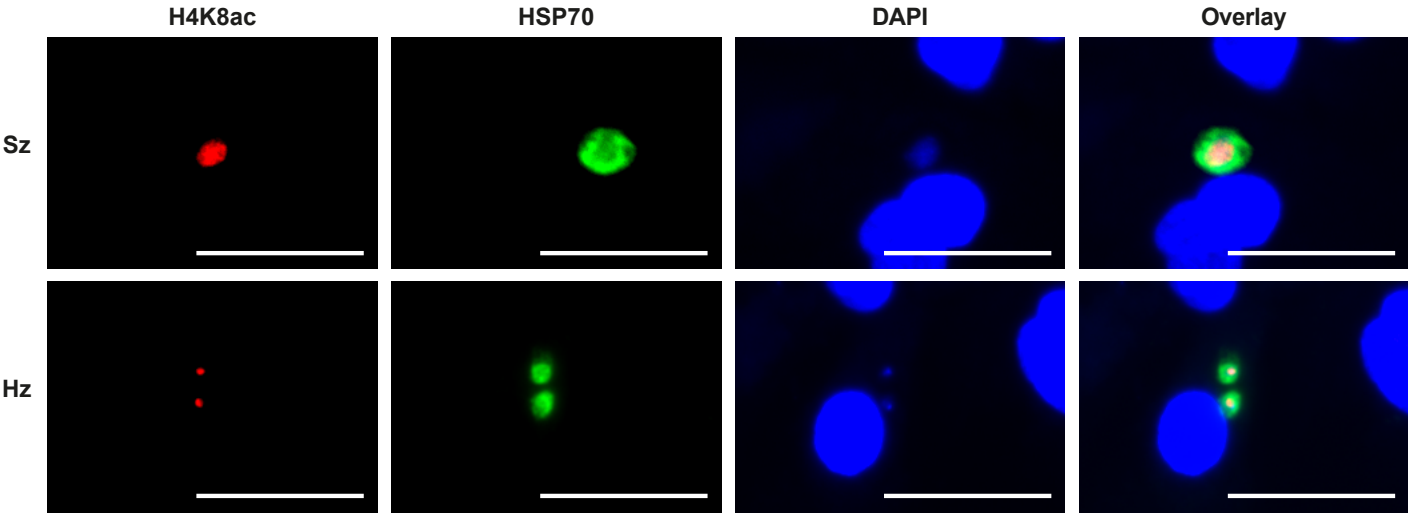

Supplement: supp [file elife-29605-supp-v1.zip]

Figure 2 - figure supplement 1

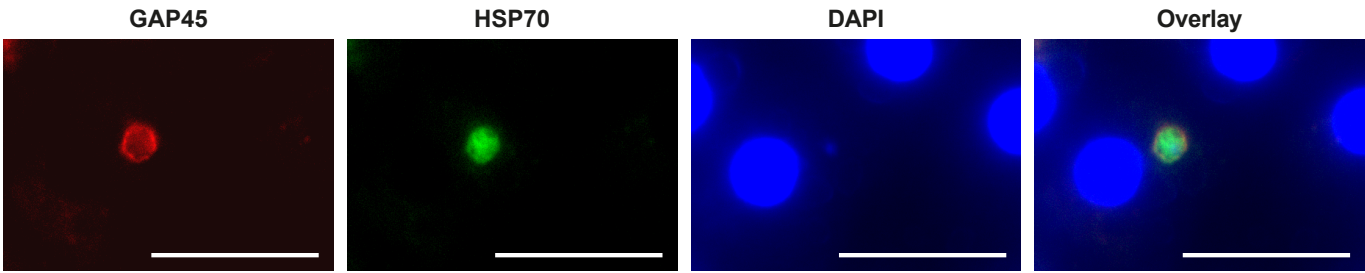

Supplement: supp [file elife-29605-supp-v1.zip]

Figure 1 - figure supplement 3

A

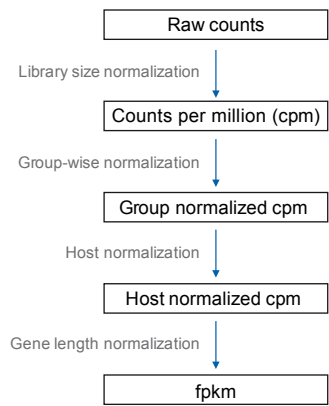

B

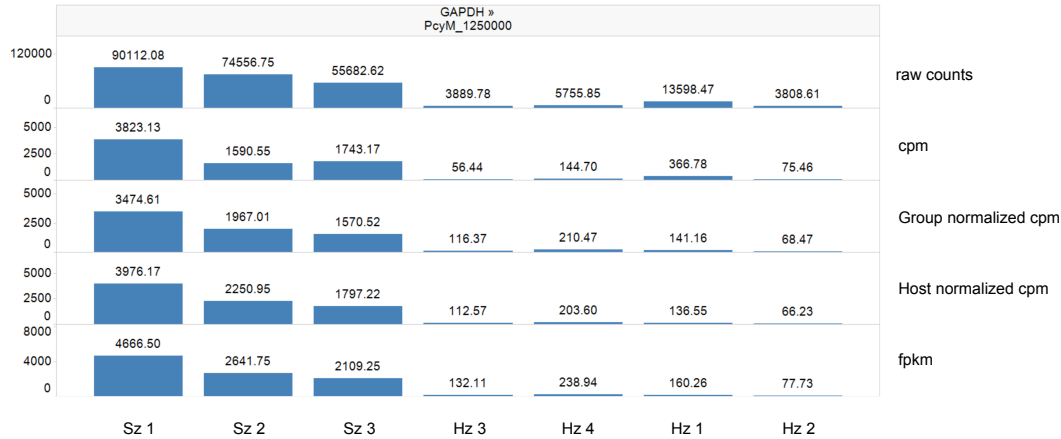

C

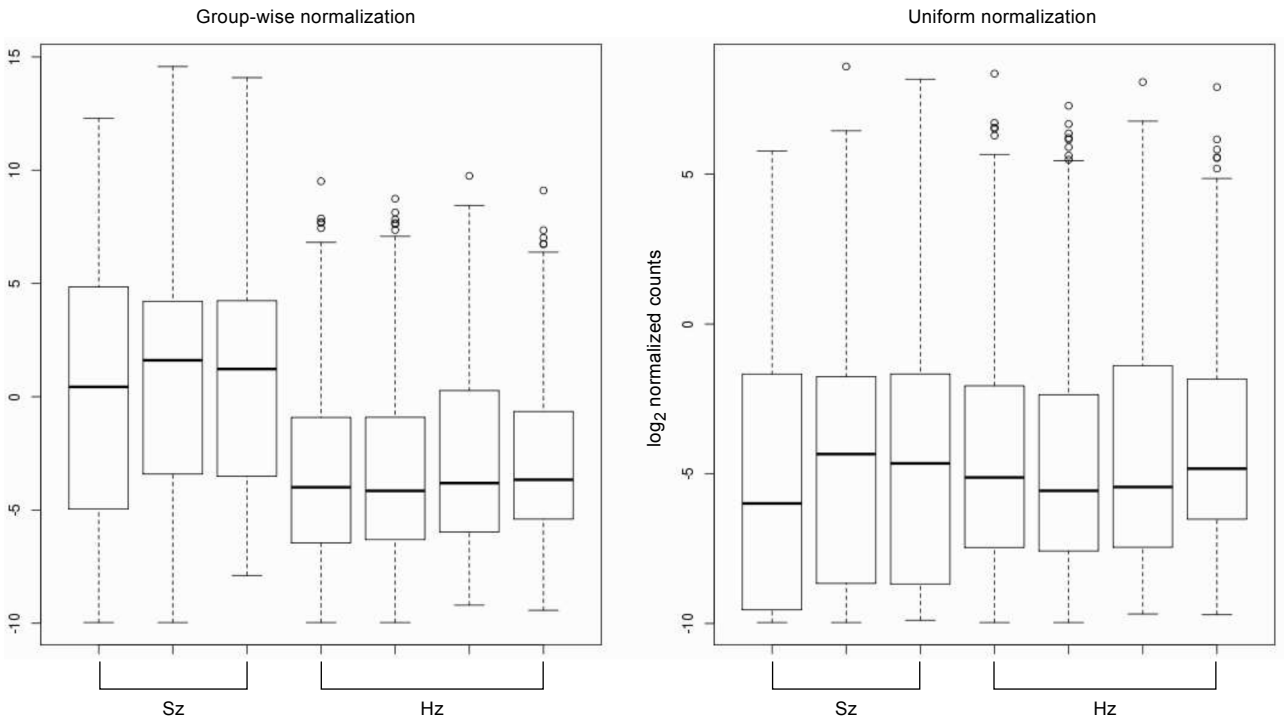

Supplement: supp [file elife-29605-supp-v1.zip]

Figure 1 - figure supplement 1

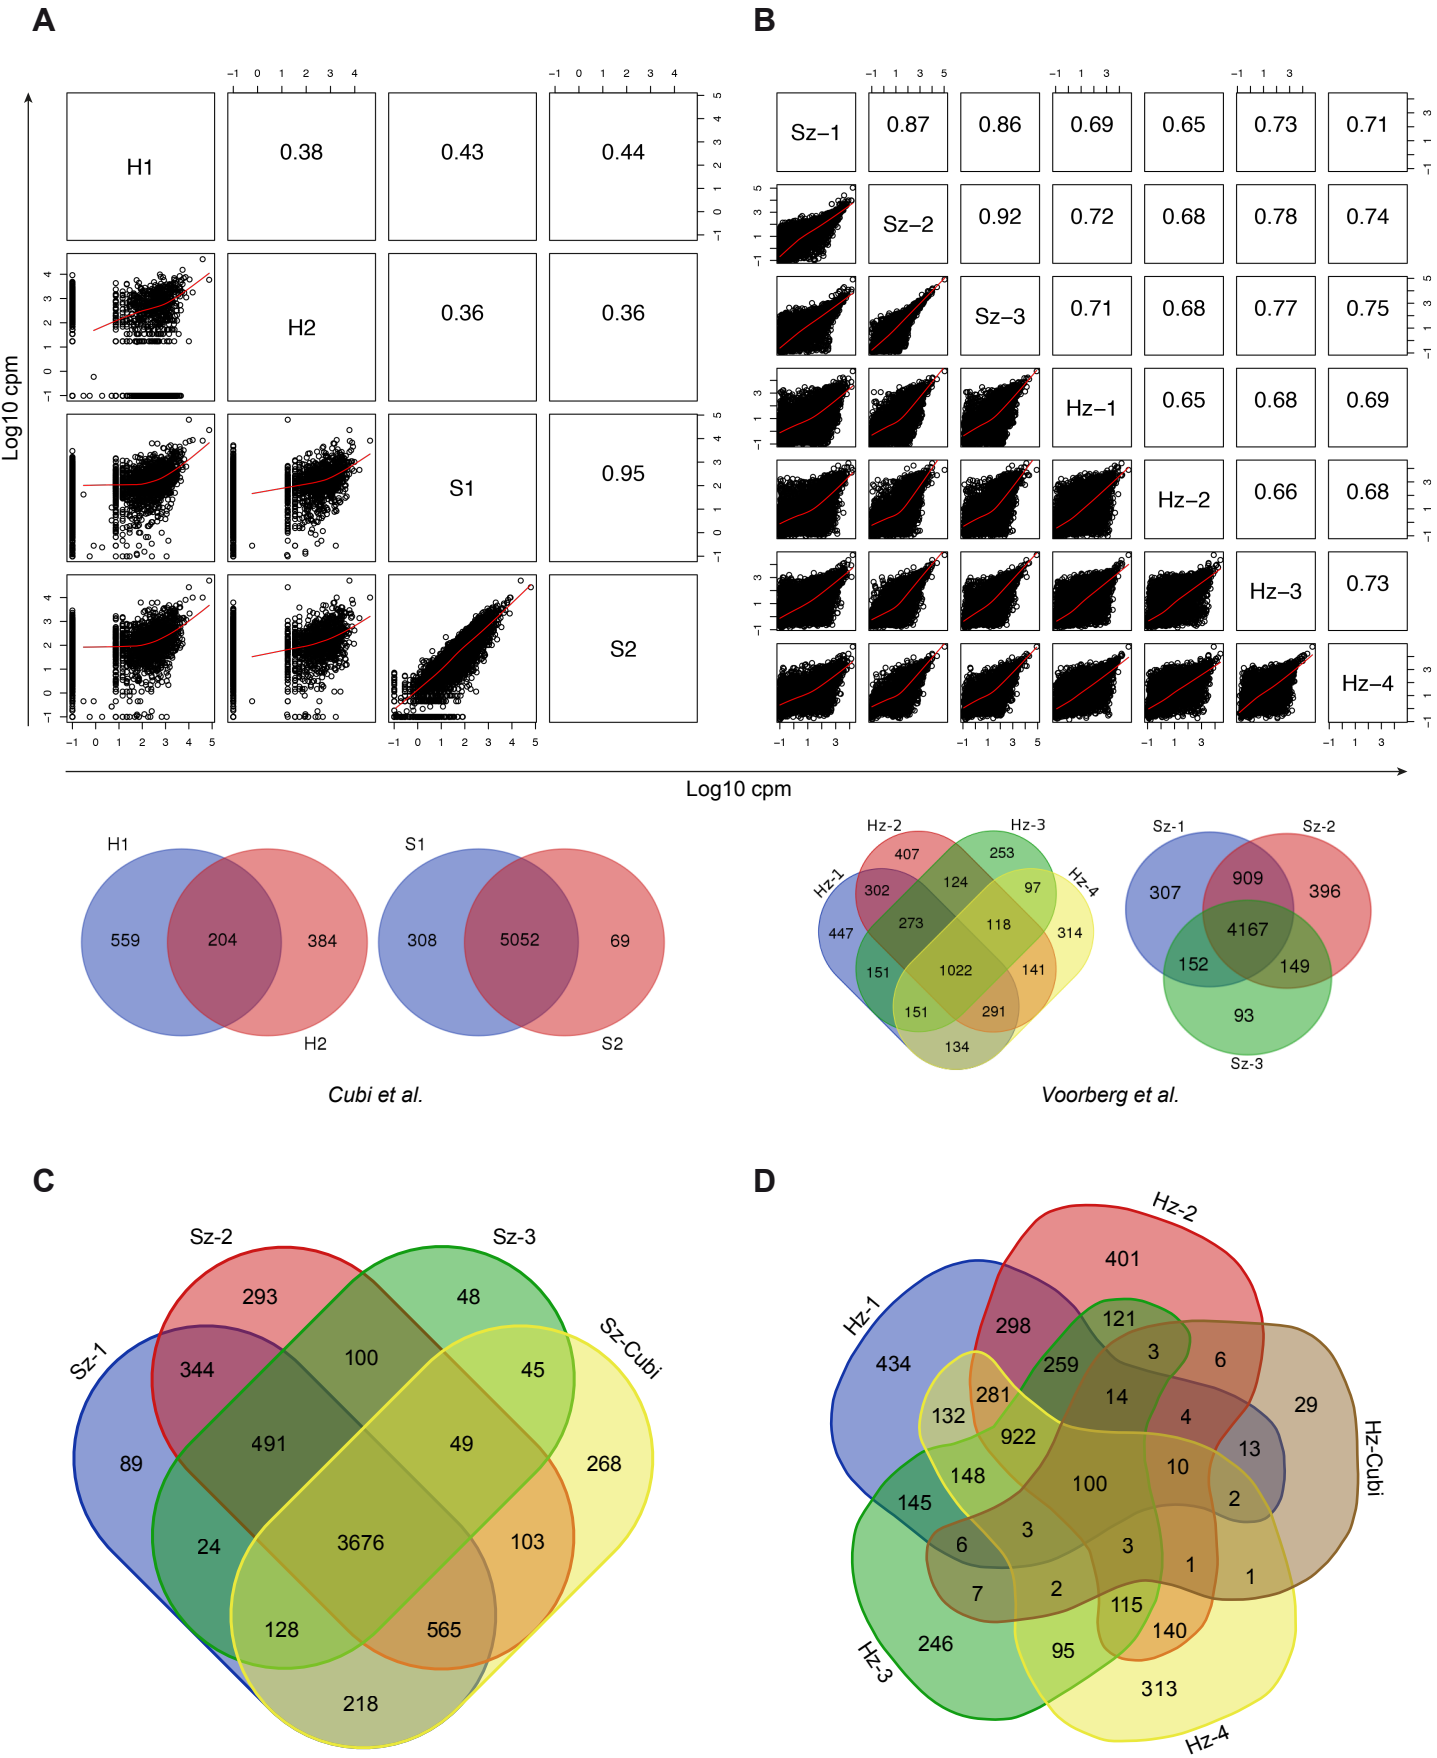

Supplement: supp [file elife-29605-supp-v1.zip]
